# Supplementary material
Source: publisher figshare collection journal article supplement (https://acs.figshare.com/ndownloader/files/20422662)

# Supporting Information

## Chemoselective Oxidative Spiroetherification and Spiroamination of Arenols Using I<sup>+</sup>/Oxone Catalysis

Muhammet Uyanik, Naoto Sahara, Outa Katade, Kazuaki Ishihara\*

Graduate School of Engineering, Nagoya University

Furo-cho, Chikusa, Nagoya 464-8603, Japan

E-mail: ishihara@cc.nagoya-u.ac.jp

### Table of Contents:

|                                                                                                  |     |
|--------------------------------------------------------------------------------------------------|-----|
| Material and Methods.....                                                                        | S1  |
| Additional Optimization of Reaction Conditions and Control Experiments.....                      | S2  |
| Table S1. Optimization of Conditions for Oxidative Spiroamination of <b>3b</b> .....             | S2  |
| Table S2. Control Experiments Using <b>1a</b> .....                                              | S2  |
| Table S3. Control Experiments Using <b>3a</b> .....                                              | S3  |
| Scheme S1. Additional Control Experiments for Spirolactonization and Comparison.....             | S4  |
| Scheme S2. Enantioselective Oxidative Spiroetherification and Spiroamination Reactions.....      | S4  |
| Synthesis and Characterization of Starting Materials.....                                        | S5  |
| Procedures for Oxidation and Characterization of Products.....                                   | S22 |
| Representative Procedure for Oxidative Dearomative Spiroetherification of Arenols <b>1</b> ..... | S22 |
| Representative Procedure for Oxidative Dearomative Spiroamination of Arenols <b>3</b> .....      | S27 |
| Procedures for Control Experiments.....                                                          | S32 |
| Control Experiments to Probe Active Species.....                                                 | S32 |
| Control Experiments to Probe the Influence of Tethers.....                                       | S33 |
| References.....                                                                                  | S34 |
| NMR Spectra.....                                                                                 | S35 |

## Materials and Methods

Infrared (IR) spectra were recorded on a JASCO FT/IR 460 plus spectrometer.  $^1\text{H}$  NMR spectra were measured on a JEOL ECS-400 (400 MHz) and Bruker AVANCE III HD (500 MHz) spectrometers at ambient temperature. Chemical shifts are reported in ppm from the solvent resonance ( $\text{CD}_3\text{CN}$ ; 1.94 ppm,  $\text{DMSO}-d_6$ ; 2.50 ppm) or  $\text{Me}_4\text{Si}$  resonance (0.00 ppm;  $\text{CDCl}_3$ ) as internal standard. Data were recorded as follows: chemical shift in ppm from internal tetramethylsilane on the  $\delta$  scale, multiplicity (s = singlet; d = doublet; t = triplet; q = quartet; quin = quintet; sept = septet; m = multiplet; brs = broad singlet), coupling constant (Hz), and integration.  $^{13}\text{C}$  NMR spectra were measured on a JEOL ECS-400 (100 MHz) and Bruker AVANCE III HD (125 MHz) spectrometers at ambient temperature. Chemical shifts were recorded in ppm from the solvent resonance employed as the internal standard ( $\text{CDCl}_3$ ; 77.00 ppm,  $\text{CD}_3\text{CN}$ ; 1.32 ppm,  $\text{C}_6\text{D}_6$ ; 128.00 ppm,  $\text{CD}_2\text{Cl}_2$ ; 53.84 ppm,  $\text{DMSO}-d_6$ ; 39.00 ppm). High-resolution mass spectral analysis (HRMS) was performed at Chemical Instrument Center, Nagoya University (JEOL JMS-700 (FAB)). For thin-layer chromatography (TLC) analysis, Merck precoated TLC plates (silica gel 60 F<sub>254</sub> 0.25 mm) were used. The products were purified by column chromatography on silica gel (E. Merck Art. 9385).

In experiments that required dry solvents, diethyl ether ( $\text{Et}_2\text{O}$ ), tetrahydrofuran (THF), *N,N*-dimethylformamide (DMF) and dichloromethane ( $\text{CH}_2\text{Cl}_2$ ), were purchased from FUJIFILM Wako Pure Chemical Industries, Ltd. as the “anhydrous” and stored over 4Å molecular sieves. Pure (deionized)-water, *tert*-butyl methyl ether (MTBE) and ethyl acetate (EtOAc) were purchased from FUJIFILM Wako Pure Chemical Industries, Ltd. and used without further purification. Other solvents were purchased from Aldrich Chemical Co., Inc., FUJIFILM Wako Pure Chemical Industries, Ltd. or Tokyo Chemical Industry Co., Ltd., and used without further purification. Tetrabutylammonium iodide ( $\text{Bu}_4\text{NI}$ ), tetrabutylammonium triiodide ( $\text{Bu}_4\text{NI}_3$ ) and cumene hydroperoxide (CHP, contains ca. 20% aromatic hydrocarbon) were purchased from Tokyo Chemical Industry Co. Ltd. and used without further purification. 30-wt% Aqueous hydrogen peroxide and 70% aqueous *tert*-butyl hydroperoxide (TBHP) were purchased from FUJIFILM Wako Pure Chemical Industries, Ltd. Oxone and anhydrous TBHP (5.5 M nonane solution) were purchased from Aldrich Chemical Co., Inc., and used without further purification. Other simple chemicals were analytical-grade and obtained commercially and used without further purification.

## Additional Optimization of Reaction Conditions and Control Experiments

**Table S1. Optimization of Conditions for Oxidative Spiroamination of 3b**

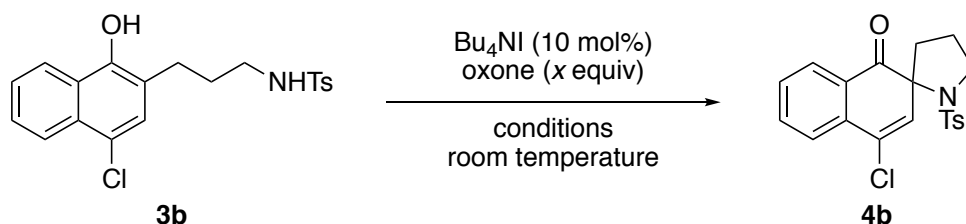

| entry          | x (equiv) | solvent                                             | time (h) | <b>3b</b> , conv. (%) <sup>a</sup> | <b>4b</b> , yield (%) <sup>a</sup> |
|----------------|-----------|-----------------------------------------------------|----------|------------------------------------|------------------------------------|
| 1 <sup>b</sup> | 0.6       | toluene (0.1 M)/H <sub>2</sub> O (2/1)              | 12       | <5                                 | <5                                 |
| 2              | 0.6       | CH <sub>3</sub> CN (0.1 M)/H <sub>2</sub> O (2/1)   | 3        | >95                                | 49                                 |
| 3              | 0.6       | CH <sub>3</sub> CN (0.02 M)/H <sub>2</sub> O (10/1) | 12       | 80                                 | 55                                 |
| 4              | 1         | CH <sub>3</sub> CN (0.02 M)/H <sub>2</sub> O (10/1) | 6        | >95                                | 65                                 |
| 5              | 1         | CH <sub>3</sub> CN (0.05 M)/H <sub>2</sub> O (5/1)  | 6        | >95                                | 61                                 |

<sup>a</sup> <sup>1</sup>H NMR analysis. <sup>b</sup> **3b** did not dissolved in a toluene–water biphasic solvent. Other arenols **3**, except **3a**, tethered to amides were found to be less soluble in toluene–water biphasic solvent.

**Table S2. Control Experiments Using 1a**

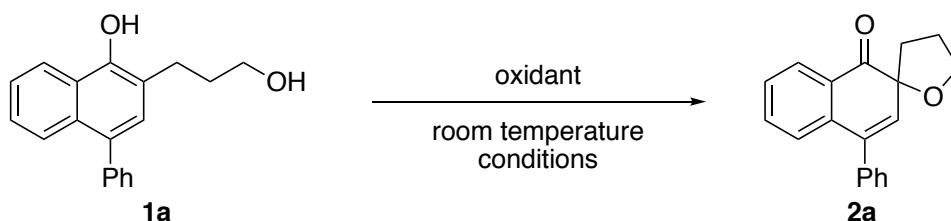

| entry          | oxidant (equiv)                                                          | solvent <sup>a</sup>                | time (h) | <b>1a</b> , conv. (%) <sup>b</sup> | <b>2a</b> , yield (%) <sup>b</sup> |
|----------------|--------------------------------------------------------------------------|-------------------------------------|----------|------------------------------------|------------------------------------|
| 1              | I <sub>2</sub> (1)                                                       | CH <sub>3</sub> CN/H <sub>2</sub> O | 1        | 40                                 | 35                                 |
| 2              | I <sub>2</sub> (1)                                                       | toluene/H <sub>2</sub> O            | 8        | 35                                 | 33                                 |
| 3              | I <sub>2</sub> (1) + AcOH (1)                                            | toluene/H <sub>2</sub> O            | 1        | 30                                 | 30                                 |
| 4 <sup>c</sup> | I <sub>2</sub> (1) + Bu <sub>4</sub> NOH (2)                             | CH <sub>3</sub> CN/H <sub>2</sub> O | 1        | 74                                 | 55                                 |
| 5 <sup>c</sup> | I <sub>2</sub> (1) + K <sub>2</sub> CO <sub>3</sub> (2)                  | toluene/H <sub>2</sub> O            | 1        | >95                                | >95                                |
| 6              | Bu <sub>4</sub> NI <sub>3</sub> (1)                                      | CH <sub>3</sub> CN/H <sub>2</sub> O | 1        | <5                                 | <1                                 |
| 7 <sup>c</sup> | Bu <sub>4</sub> NI <sub>3</sub> (1) + K <sub>2</sub> CO <sub>3</sub> (2) | CH <sub>3</sub> CN/H <sub>2</sub> O | 1        | 75                                 | 7                                  |
| 8              | NaIO <sub>3</sub> (1)                                                    | CH <sub>3</sub> CN/H <sub>2</sub> O | 24       | <5                                 | <1                                 |
| 9 <sup>d</sup> | NaIO <sub>4</sub> (1)                                                    | CH <sub>3</sub> CN/H <sub>2</sub> O | 12       | >95                                | 40                                 |

<sup>a</sup> Solvent (0.1 M)/H<sub>2</sub>O (2/1, v/v). <sup>b</sup> <sup>1</sup>H NMR analysis. <sup>c</sup> Hypoiodite species might be generated *in situ* under these conditions (see: Uyanik, M.; Hayashi, H.; Ishihara, K. *Science* **2014**, 345, 291). Notably, with the use of I<sub>2</sub>, compared to strong alkali conditions with Bu<sub>4</sub>NOH, cleaner reactions were observed under mild basic conditions with K<sub>2</sub>CO<sub>3</sub> (entry 5 versus entry 4). On the other hand, although oxidation of **1a** proceeded with the use of Bu<sub>4</sub>NI<sub>3</sub> in the presence of K<sub>2</sub>CO<sub>3</sub>, a complex reaction mixture was observed and **2a** was obtained in only 7% yield (entry 7). <sup>d</sup> Although oxidation of **1a** proceeded with the use of NaIO<sub>4</sub> to give **2a** in moderate yield along with several unidentified side products, according to the Raman analysis, high valent species ([IO<sub>4</sub>]<sup>−</sup> or [IO<sub>3</sub>]<sup>−</sup>) were not generated under the present Bu<sub>4</sub>NI/oxone catalytic conditions (see: Uyanik, M.; Kato, T.; Sahara, N.; Katade, O.; Ishihara, K. *ACS Catal.* **2019**, 9, 11619).

**Table S3. Control Experiments Using 3a**

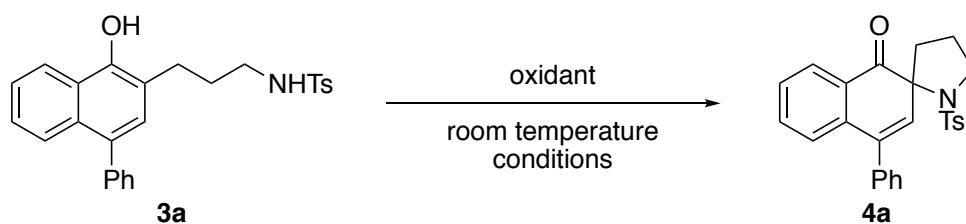

| entry          | oxidant (equiv)                                                          | solvent <sup>a</sup>     | time (h) | <b>1a</b> , conv. (%) <sup>b</sup> | <b>2a</b> , yield (%) <sup>b</sup> |
|----------------|--------------------------------------------------------------------------|--------------------------|----------|------------------------------------|------------------------------------|
| 1              | I <sub>2</sub> (1)                                                       | toluene/H <sub>2</sub> O | 1        | 30                                 | 30                                 |
| 2 <sup>c</sup> | I <sub>2</sub> (1) + Bu <sub>4</sub> NOH (2)                             | toluene/H <sub>2</sub> O | 1        | >95                                | <5                                 |
| 3 <sup>c</sup> | I <sub>2</sub> (1) + K <sub>2</sub> CO <sub>3</sub> (2)                  | toluene/H <sub>2</sub> O | 1        | >95                                | >95                                |
| 4 <sup>c</sup> | I <sub>2</sub> (1) + K <sub>2</sub> CO <sub>3</sub> (2)                  | toluene                  | 1        | 30                                 | 30                                 |
| 5              | Bu <sub>4</sub> NI <sub>3</sub> (1)                                      | toluene/H <sub>2</sub> O | 1        | <5                                 | <1                                 |
| 6 <sup>c</sup> | Bu <sub>4</sub> NI <sub>3</sub> (1) + K <sub>2</sub> CO <sub>3</sub> (2) | toluene/H <sub>2</sub> O | 1        | 40                                 | <5                                 |
| 7              | NaIO <sub>3</sub> (1)                                                    | toluene/H <sub>2</sub> O | 24       | <5                                 | <1                                 |
| 8              | NaIO <sub>4</sub> (1)                                                    | toluene/H <sub>2</sub> O | 12       | >5                                 | <1                                 |

<sup>a</sup> Toluene (0.1 M)/H<sub>2</sub>O (2/1, v/v). <sup>b</sup> <sup>1</sup>H NMR analysis. <sup>c</sup> Hypoiodite species might be generated *in situ* under these conditions (see: Uyanik, M.; Hayashi, H.; Ishihara, K. *Science* **2014**, 345, 291). Notably, compared to strong alkali conditions with Bu<sub>4</sub>NOH, cleaner reactions were observed with the use of I<sub>2</sub> under mild basic conditions with K<sub>2</sub>CO<sub>3</sub> (entries 3 and 4 versus entry 2). On the other hand, although oxidation of **3a** proceeded with the use of Bu<sub>4</sub>NI<sub>3</sub> in the presence of K<sub>2</sub>CO<sub>3</sub>, a complex reaction mixture was observed and **4a** was obtained in less than 5% yield (entry 6).



## Scheme S1. Additional Control Experiments for Spirolactonization and Comparison

Previous results (Uyanik, M.; Kato, T.; Sahara, N.; Katade, O.; Ishihara, K. *ACS Catal.* **2019**, *9*, 11619)

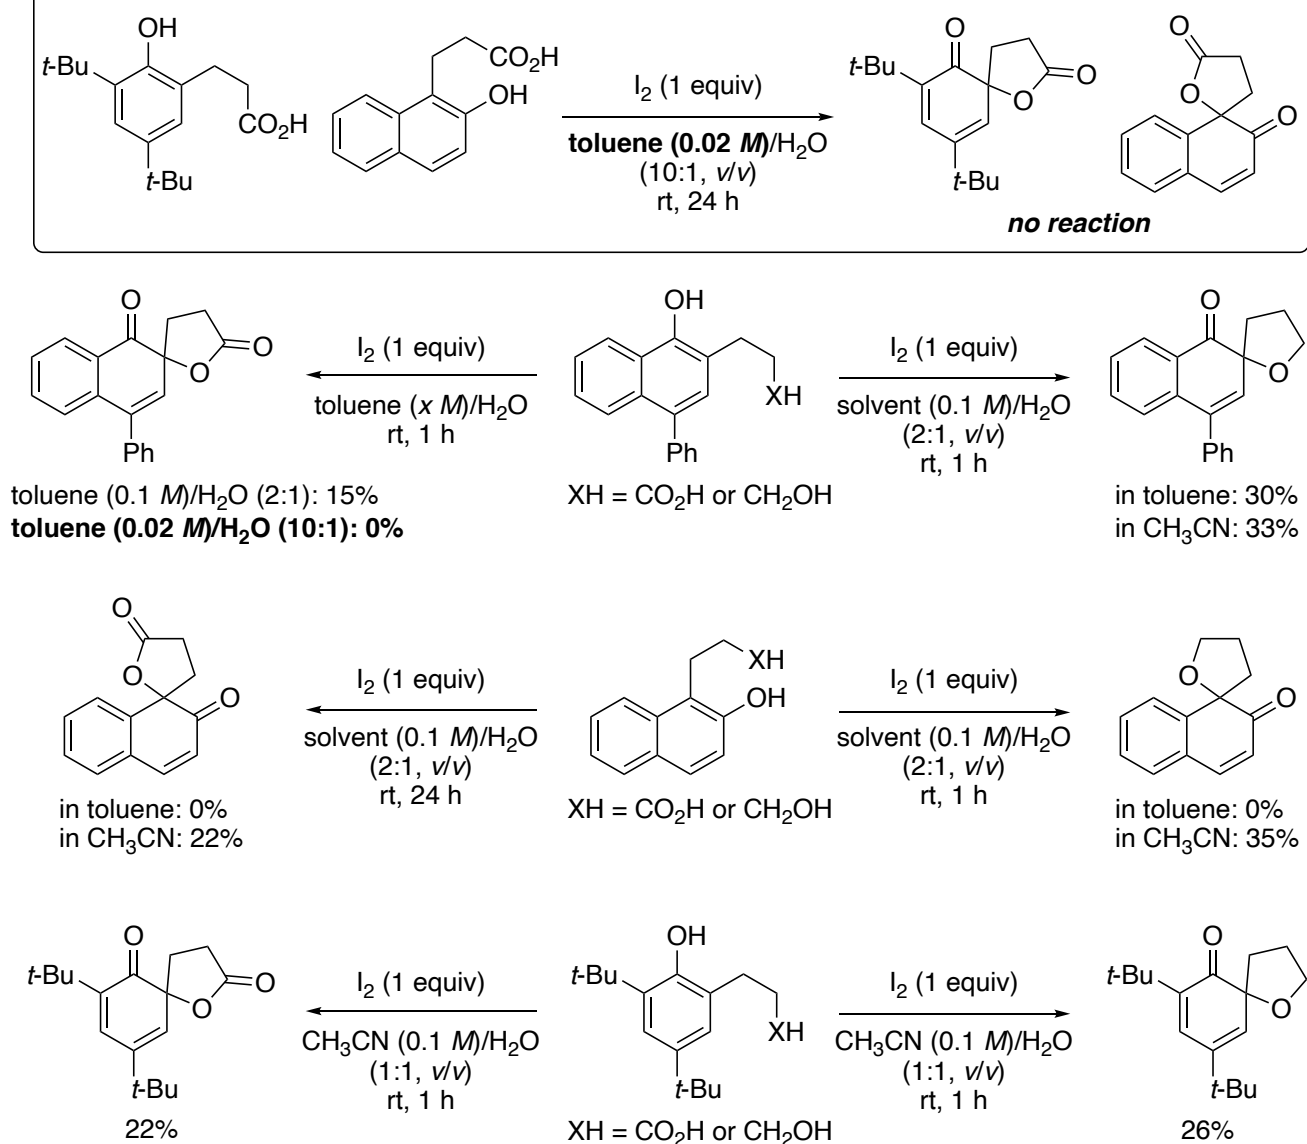

## Scheme S2. Enantioselective Oxidative Spiroetherification and Spiroamination Reactions

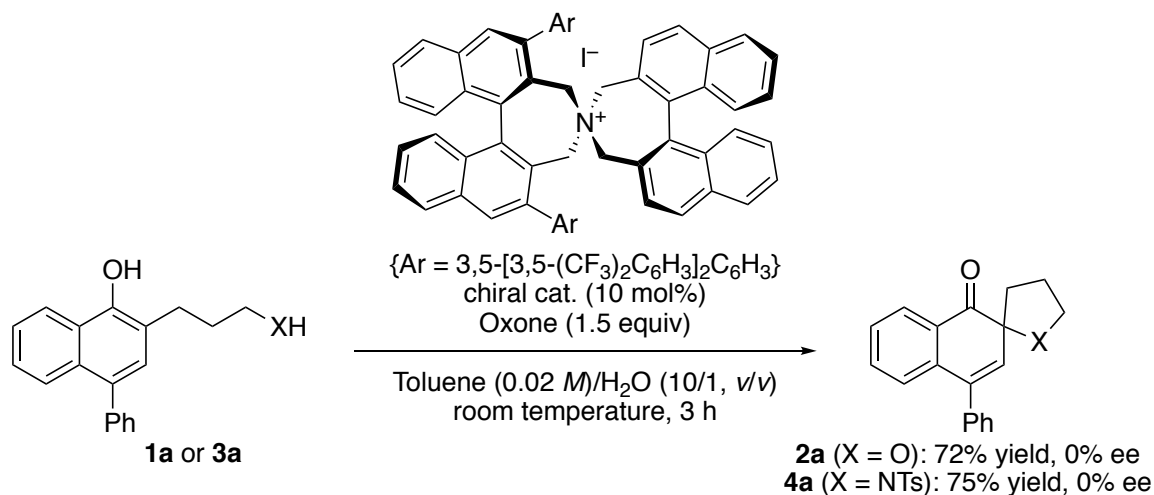

## Synthesis and Characterization of Substrates

Substrates **1a**,<sup>1</sup> **1b–1d**,<sup>2</sup> **1e**,<sup>3</sup> **1i**,<sup>4</sup> **1j**,<sup>4</sup> **1l**,<sup>3</sup> **1m**,<sup>3</sup> **3aa**<sup>1</sup> and **3ea**<sup>5</sup> were known compounds and prepared by following the literature procedures.

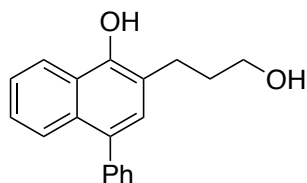

**2-(3-Hydroxypropyl)-4-phenylnaphthalen-1-ol (1a):**<sup>1</sup> White solid; **TLC**,  $R_f = 0.52$  (Hexane–EtOAc = 1:1); **<sup>1</sup>H NMR** (CDCl<sub>3</sub>, 400 MHz)  $\delta$  1.94–2.03 (m, 3H), 2.98 (t,  $J = 6.6$  Hz, 2H), 3.69–3.72 (m, 2H), 7.17 (s, 1H), 7.37–7.42 (m, 2H), 7.44–7.49 (m, 5H), 7.83–7.87 (m, 2H), 8.35 (d,  $J = 8.2$  Hz, 1H); **<sup>13</sup>C NMR** (CDCl<sub>3</sub>, 100 MHz)  $\delta$  25.1, 31.4, 60.3, 119.2, 122.4, 125.0, 125.5, 125.6, 125.7, 126.8, 128.2, 129.7, 130.2, 131.5, 132.6, 140.9, 149.8.

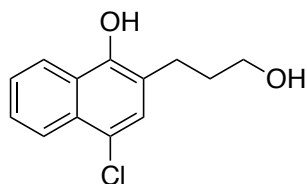

**4-Chloro-2-(3-hydroxypropyl)naphthalen-1-ol (1b):**<sup>2</sup> White solid; **TLC**,  $R_f = 0.48$  (Hexane–EtOAc = 1:1); **<sup>1</sup>H NMR** (CDCl<sub>3</sub>, 400 MHz)  $\delta$  1.93–2.00 (m, 3H), 2.92–2.95 (m, 2H), 3.68 (t,  $J = 5.7$  Hz, 2H), 7.31 (s, 1H), 7.50–7.58 (m, 2H), 7.99 (brs, 1H), 8.14–8.16 (m, 1H), 8.29–8.31 (m, 1H); **<sup>13</sup>C NMR** (CDCl<sub>3</sub>, 100 MHz)  $\delta$  24.9, 31.1, 60.1, 120.3, 122.6, 122.7, 124.0, 125.8, 126.5, 126.6, 128.3, 130.3, 149.4.

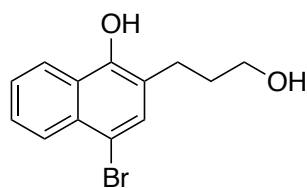

**4-Bromo-2-(3-hydroxypropyl)naphthalen-1-ol (1c):**<sup>2</sup> White solid; **TLC**,  $R_f = 0.48$  (Hexane–EtOAc = 1:1); **<sup>1</sup>H NMR** (CDCl<sub>3</sub>, 400 MHz)  $\delta$  1.93–2.05 (m, 3H), 2.91–2.95 (m, 2H), 3.67 (t,  $J = 5.7$  Hz, 2H), 7.49–7.57 (m, 3H), 8.03 (brs, 1H), 8.09–8.12 (m, 1H), 8.28–8.31 (m, 1H); **<sup>13</sup>C NMR** (CDCl<sub>3</sub>, 100 MHz)  $\delta$  24.8, 31.1, 60.1, 112.7, 120.8, 122.7, 125.8, 126.6, 126.7, 126.9, 131.6, 131.9, 150.3

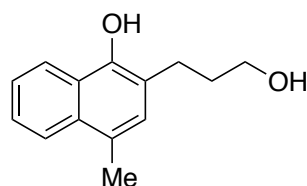

**2-(3-Hydroxypropyl)-4-methylnaphthalen-1-ol (1d):**<sup>2</sup> White solid;  $R_f = 0.50$  (Hexane–EtOAc = 1:1);  $^1\text{H NMR}$  ( $\text{CDCl}_3$ , 400 MHz)  $\delta$  1.92–1.98 (m, 3H), 2.59 (s, 3H), 2.91–2.94 (m, 2H), 3.66 (q,  $J = 5.2$  Hz, 2H), 7.04 (s, 1H), 7.47–7.49 (m, 2H), 7.59 (s, 1H), 7.87–7.90 (m, 1H), 8.28–8.30 (m, 1H);  $^{13}\text{C NMR}$  ( $\text{CDCl}_3$ , 100 MHz)  $\delta$  18.7, 25.0, 31.4, 60.3, 119.4, 122.5, 123.9, 124.8, 125.3, 125.5, 126.1, 129.0, 132.3, 148.3.

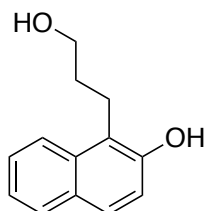

**1-(3-Hydroxypropyl)naphthalen-2-ol (1e):**<sup>3</sup> White solid;  $R_f = 0.35$  (Hexane–EtOAc = 1:1);  $^1\text{H NMR}$  ( $\text{CDCl}_3$ , 400 MHz)  $\delta$  2.01–2.07 (m, 2H), 2.43 (s, 1H), 3.24 (t,  $J = 6.6$  Hz, 2H), 3.63 (t,  $J = 5.5$  Hz, 2H), 7.16 (d,  $J = 8.7$  Hz, 1H), 7.33 (td,  $J = 7.4, 1.2$  Hz, 1H), 7.46–7.50 (m, 1H), 7.65–7.67 (m, 2H), 7.78 (d,  $J = 8.2$  Hz, 1H), 7.90 (d,  $J = 8.7$  Hz, 1H);  $^{13}\text{C NMR}$  ( $\text{CDCl}_3$ , 100 MHz)  $\delta$  20.0, 30.2, 60.5, 117.8, 118.7, 122.6, 122.9, 126.3, 128.1, 128.6, 129.5, 133.2, 152.3.

#### Synthesis of 1f:

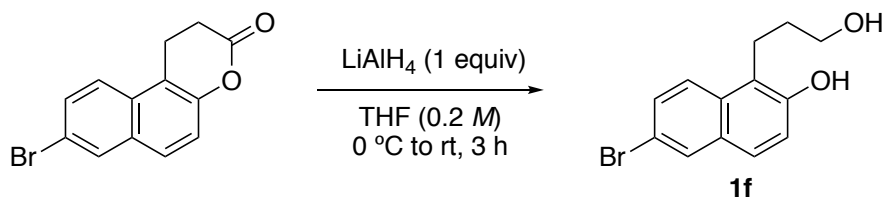

To a solution of 8-bromo-1,2-dihydro-3H-benzo[f]chromen-3-one<sup>6</sup> (0.415 g, 1.50 mmol) in THF (8.00 mL) was added  $\text{LiAlH}_4$  (0.0569 g, 1.50 mmol) at 0 °C. After stirring for 3 h at room temperature, resulting mixture was cooled at 0 °C and sequentially quenched by saturated aqueous Rochelle salt (15 mL). After stirring for 30 min at room temperature, the aqueous layers were extracted with EtOAc (twice). The combined organic layers were washed with brine and dried over anhydrous  $\text{MgSO}_4$ , then the solvents were removed *in vacuo*. The residue was purified by flash column chromatography on silica gel (E. Merck Art. 9385, eluent: hexane–EtOAc = 3:1) to give **1f** (0.240 g, 1.10 mmol, 73% yield).

**6-Bromo-1-(3-hydroxypropyl)naphthalen-2-ol (1f):** White solid;  $R_f = 0.32$  (Hexane–EtOAc = 1:1); **IR** (KBr) 3358, 3112, 1585, 1499, 1348, 1232, 1048, 890  $\text{cm}^{-1}$ ;  $^1\text{H NMR}$  ( $\text{CDCl}_3$ , 400 MHz)  $\delta$  1.99–2.05 (m, 2H), 2.36 (brs, 1H), 3.20 (t,  $J = 6.4$  Hz, 2H), 3.62 (t,  $J = 5.5$  Hz, 2H), 7.17 (d,  $J = 9.2$  Hz, 1H), 7.51–7.57 (m, 2H), 7.75 (d,  $J = 9.2$  Hz, 2H), 7.92 (d,  $J = 1.8$  Hz, 1H);  $^{13}\text{C NMR}$  ( $\text{CDCl}_3$ , 100 MHz)  $\delta$  20.0, 30.2, 60.4, 116.6, 118.2, 119.9, 124.5, 127.2, 129.4, 130.5, 130.7, 131.8, 152.7; **HRMS** (FAB)  $m/z$  calcd for  $[\text{C}_{13}\text{H}_{13}^{79}\text{BrO}_2]^+ / [\text{C}_{13}\text{H}_{13}^{81}\text{BrO}_2]^+$  280.0099/282.0078, found 280.0087/282.0078.

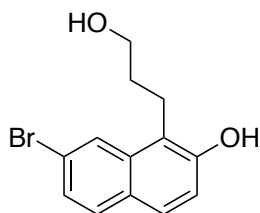

**7-Bromo-1-(3-hydroxypropyl)naphthalen-2-ol (1g):** This compound was synthesized from 9-bromo-1,2-dihydro-3*H*-benzo[*f*]chromen-3-one<sup>6</sup> as in **1f** in 76% yield (0.371 g, 1.32 mmol). White solid;  $R_f$  = 0.39 (Hexane–EtOAc = 1:1); **IR** (KBr) 3396, 3127, 1502, 1342, 1083, 977, 827  $\text{cm}^{-1}$ ; **<sup>1</sup>H NMR** ( $\text{CDCl}_3$ , 400 MHz)  $\delta$  2.00–2.06 (m, 2H), 2.67 (brs, 1H), 3.18 (t,  $J$  = 6.4 Hz, 2H), 3.63 (t,  $J$  = 5.5 Hz, 2H), 7.16 (d,  $J$  = 8.7 Hz, 1H), 7.39 (dd,  $J$  = 8.7, 1.8 Hz, 1H), 7.62 (t,  $J$  = 9.2 Hz, 2H), 8.01 (brs, 2H); **<sup>13</sup>C NMR** ( $\text{CDCl}_3$ , 100 MHz)  $\delta$  20.0, 30.1, 60.4, 117.2, 119.2, 120.9, 125.0, 126.2, 127.8, 128.1, 130.3, 134.6, 153.2; **HRMS** (FAB)  $m/z$  calcd for  $[\text{C}_{13}\text{H}_{13}^{79}\text{BrO}_2]^+ / [\text{C}_{13}\text{H}_{13}^{81}\text{BrO}_2]^+$  280.0099/282.0078, found 280.0098/282.0076.

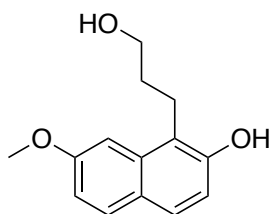

**1-(3-Hydroxypropyl)-7-methoxynaphthalen-2-ol (1g):** This compound was synthesized from 9-methoxy-1,2-dihydro-3*H*-benzo[*f*]chromen-3-one<sup>6</sup> as in **1f** in 75% yield (0.262 g, 1.13 mmol). Pale yellow solid;  $R_f$  = 0.33 (Hexane–EtOAc = 1:1); **IR** (KBr) 3435, 3140, 2937, 1631, 1513, 1462, 1227, 1029, 828  $\text{cm}^{-1}$ ; **<sup>1</sup>H NMR** ( $\text{CDCl}_3$ , 400 MHz)  $\delta$  2.02–2.08 (m, 3H), 3.20 (t,  $J$  = 6.4 Hz, 2H), 3.64–3.64 (m, 2H), 3.93 (s, 3H), 7.00–7.02 (m, 2H), 7.18 (d,  $J$  = 2.7 Hz, 1H), 7.33 (s, 1H), 7.58 (d,  $J$  = 8.7 Hz, 1H), 7.69 (d,  $J$  = 9.2 Hz, 1H); **<sup>13</sup>C NMR** ( $\text{CDCl}_3$ , 100 MHz)  $\delta$  20.2, 29.9, 55.3, 60.5, 102.1, 114.8, 116.0, 117.0, 124.8, 127.8, 130.2, 134.5, 152.7, 158.2; **HRMS** (FAB)  $m/z$  calcd for  $[\text{C}_{14}\text{H}_{16}\text{O}_3]^+$  232.1099, found 232.1093.

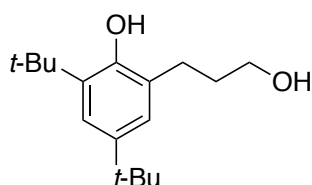

**2,4-Di-tert-butyl-6-(3-hydroxypropyl)phenol (1i):**<sup>4</sup> White solid; **TLC**,  $R_f$  = 0.31 (hexane–EtOAc = 1:1); **<sup>1</sup>H NMR** ( $\text{CDCl}_3$ , 400 MHz)  $\delta$  1.29 (s, 9H), 1.42 (s, 9H), 1.85–1.91 (m, 2H), 2.01 (brs, 1H), 2.76 (t,  $J$  = 6.9 Hz, 2H), 3.65–3.68 (m, 2H), 6.73 (s, 1H), 6.97 (d,  $J$  = 2.7 Hz, 1H), 7.18 (d,  $J$  = 2.7 Hz, 1H); **<sup>13</sup>C NMR** ( $\text{CDCl}_3$ , 100 MHz)  $\delta$  25.7, 29.9, 31.6, 32.2, 34.2, 34.9, 60.9, 122.1, 124.9, 126.6, 135.9, 142.0, 151.1.

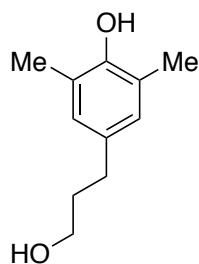

**4-(3-Hydroxypropyl)-2,6-dimethylphenol (1j):**<sup>4</sup> White solid; TLC,  $R_f = 0.78$  (Hexane–EtOAc = 1:1); <sup>1</sup>H NMR (CDCl<sub>3</sub>, 400 MHz)  $\delta$  1.26 (t,  $J = 5.0$  Hz, 1H), 1.81–1.88 (m, 2H), 2.22 (s, 6H), 2.58 (t,  $J = 7.6$  Hz, 2H), 3.67 (q,  $J = 5.8$  Hz, 2H), 4.51 (s, 1H), 6.81 (s, 2H); <sup>13</sup>C NMR (CDCl<sub>3</sub>, 100 MHz)  $\delta$  16.0, 31.3, 34.6, 62.5, 123.1, 128.6, 133.4, 150.4.

### Synthesis of 1k:

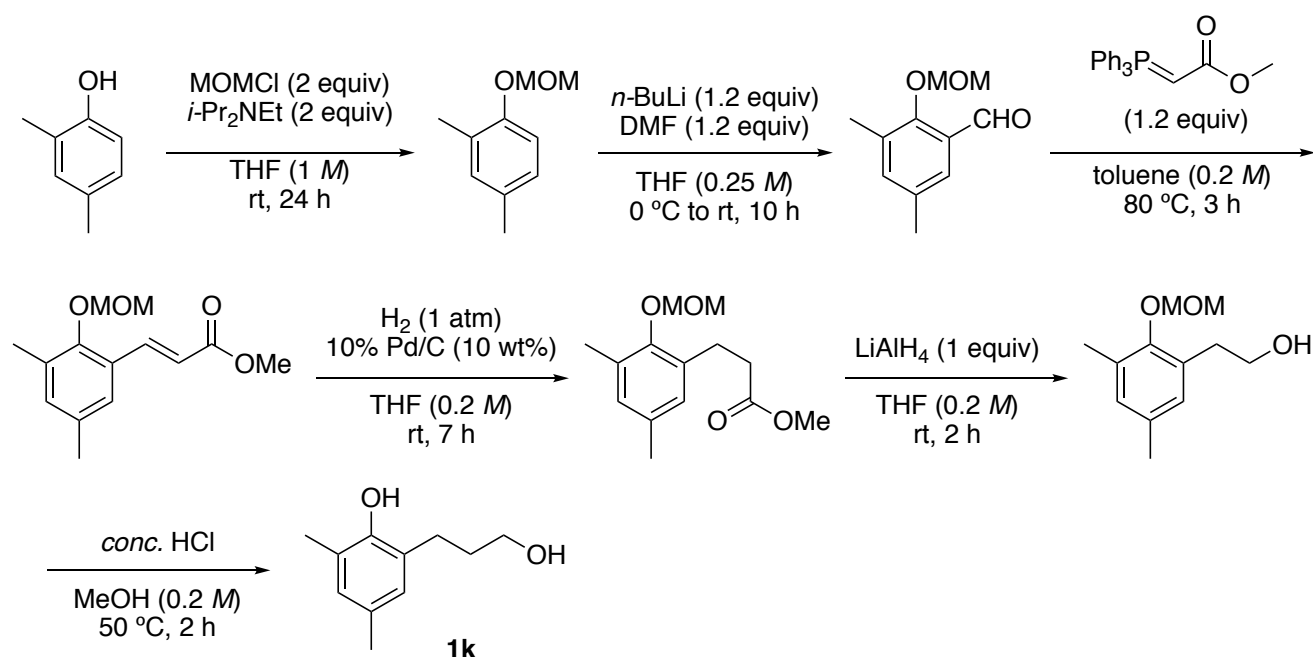

To a solution of 2,4-dimethylphenol (1.19 g, 10.0 mmol) in THF (10.0 mL) was added diisopropylamine (3.49 mL, 20.0 mmol) and chloromethyl methyl ether (1.52 mL, 20.0 mmol) at 0 °C. After stirring for 24 h at room temperature, resulting mixture was poured into H<sub>2</sub>O (20 mL), and the aqueous layers were extracted with EtOAc (twice). The combined organic layers were washed with brine and dried over anhydrous MgSO<sub>4</sub>, then the solvents were removed *in vacuo*. The residue was purified by flash column chromatography on silica gel (E. Merck Art. 9385, eluent: hexane–EtOAc = 20:1) to give 1-(methoxymethoxy)-2,4-dimethylbenzene (1.21 g, 7.27 mmol, 73% yield).

To a solution of this MOM ether (1.21 g, 7.27 mmol) in THF (37.0 mL) was added *n*-BuLi (5.02 mL, 8.03 mmol, 1.6 M in hexane) dropwise at 0 °C. After stirring for 1 h at room temperature, to the reaction mixture was added anhydrous DMF (1.14 mL, 14.6 mmol) at room temperature. After stirring for 12 h, the resulting mixture was quenched by saturated aqueous NH<sub>4</sub>Cl (10 mL). The aqueous layers were extracted with Et<sub>2</sub>O (twice). The combined organic layers were washed with brine and dried over anhydrous MgSO<sub>4</sub>, then the solvents were removed *in vacuo*. The residue was purified by

flash column chromatography on silica gel (E. Merck Art. 9385, eluent: hexane-EtOAc = 20:1) to give 2-(methoxymethoxy)-3,5-dimethylbenzaldehyde (0.715 g, 3.68 mmol, 50% yield).

To a solution of this aldehyde (0.715 g, 3.68 mmol) in toluene (20.0 mL) was added methyl(triphenylphosphoranylidene)acetate (1.47 g, 4.44 mmol) at room temperature. After stirring for 3 h at 80 °C, the resulting mixture was cooled to room temperature and diluted with water and EtOAc. The aqueous layers were separated and extracted with EtOAc (twice). The combined organic layers were washed with brine and dried over anhydrous MgSO<sub>4</sub>, then the solvents were removed *in vacuo*. The residue was purified by flash chromatography on silica gel (E. Merck Art. 9385, eluent: hexane-EtOAc = 10:1) to give methyl (*E*)-3-(2-(methoxymethoxy)-3,5-dimethylphenyl)acrylate (0.908 g, 3.62 mmol, 98% yield).

To a solution of this olefin (0.908 g, 3.62 mmol) in THF (18.0 mL) was added 10% Pd/C (0.0908 g). The flask containing the mixture was then evacuated and purged with H<sub>2</sub> three times. In an H<sub>2</sub> gas environment, the resulting mixture was stirred at room temperature for 7 h. Upon the completion of the reaction, the mixture was filtered through celite with EtOAc and the crude product was obtained after removal of the solvent *in vacuo*.

Without further purification, to a solution of this ester in THF (7.20 mL) was added LiAlH<sub>4</sub> (0.137 g, 3.62 mmol) at 0 °C. After stirring for 3 h at room temperature, resulting mixture was cooled at 0 °C and sequentially quenched by saturated aqueous Rochelle salt (15 mL). After stirring for 30 min at room temperature, the aqueous layers were extracted with EtOAc (twice). The combined organic layers were washed with brine and dried over anhydrous MgSO<sub>4</sub>, then the solvents were removed *in vacuo*. The residue was purified by flash column chromatography on silica gel (E. Merck Art. 9385, eluent: hexane-EtOAc = 5:1) to give 3-(2-(methoxymethoxy)-3,5-dimethylphenyl)propan-1-ol (0.796 g, 3.55 mmol, 98% yield, 2 steps).

To a solution of this alcohol (0.308 g, 1.70 mmol) in MeOH (8.50 mL) was added *conc.* HCl aq. (ca. 0.100 mL). After stirring for 2 h at 50 °C, the reaction mixture was cooled to room temperature, and to the mixture was added water (20 mL) and the aqueous layers were extracted with EtOAc (twice). The combined organic layers were washed with brine and dried over anhydrous MgSO<sub>4</sub>, then the solvents were removed *in vacuo*. The residue was purified by flash column chromatography on silica gel (E. Merck Art. 9385, eluent: hexane-EtOAc = 2:1) to give **1k** (0.256 g, 1.42 mmol, 84% yield).

**2-(3-Hydroxypropyl)-4,6-dimethylphenol (1k):** White solid; TLC, *R*<sub>f</sub> = 0.49 (Hexane-EtOAc = 1:1); IR (KBr) 3467, 2949, 1482, 1325, 1193, 1054, 997, 864 cm<sup>-1</sup>; <sup>1</sup>H NMR (CDCl<sub>3</sub>, 400 MHz) δ 1.83–1.89 (m, 2H), 2.18–2.29 (m, 1H), 2.22 (s, 6H), 2.73 (t, *J* = 6.9 Hz, 2H), 3.64 (t, *J* = 5.5 Hz, 2H), 6.59 (brs, 1H), 6.76 (s, 1H), 6.81 (s, 1H); <sup>13</sup>C NMR (CDCl<sub>3</sub>, 100 MHz) δ 16.2, 20.4, 25.2, 32.1, 60.7, 124.4, 126.4, 128.6, 129.3, 129.5, 150.5; HRMS (FAB) *m/z* calcd for [C<sub>11</sub>H<sub>16</sub>O<sub>2</sub>]<sup>+</sup> 180.1150, found 180.1144.

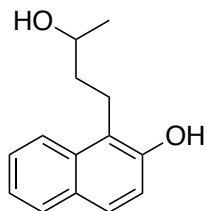

**1-(3-Hydroxybutyl)naphthalen-2-ol (1l):**<sup>3</sup> Pale yellow solid; TLC,  $R_f = 0.46$  (Hexane–EtOAc = 1:1);  $^1\text{H NMR}$  ( $\text{CDCl}_3$ , 400 MHz)  $\delta$  1.21 (d,  $J = 6.0$  Hz, 3H), 1.81–1.89 (m, 1H), 1.92–2.00 (m, 1H), 2.29 (brs, 1H), 3.18–3.28 (m, 2H), 3.70 (brs, 1H), 7.17 (d,  $J = 9.2$  Hz, 1H), 7.31–7.35 (m, 1H), 7.46–7.50 (m, 1H), 7.65 (d,  $J = 8.7$  Hz, 1H), 7.78 (d,  $J = 8.2$  Hz, 1H), 7.88 (d,  $J = 8.7$  Hz, 1H), 7.93 (s, 1H);  $^{13}\text{C NMR}$  ( $\text{CDCl}_3$ , 100 MHz)  $\delta$  20.8, 23.8, 37.3, 66.7, 118.3, 118.9, 122.6, 122.9, 126.2, 128.0, 128.7, 129.4, 133.2, 152.4.

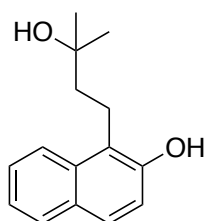

**1-(3-Hydroxy-3-methylbutyl)naphthalen-2-ol (1m):**<sup>3</sup> White solid; TLC,  $R_f = 0.44$  (Hexane–EtOAc = 1:1);  $^1\text{H NMR}$  ( $\text{CDCl}_3$ , 400 MHz)  $\delta$  1.33 (s, 6H), 1.91 (t,  $J = 7.1$  Hz, 2H), 2.14 (brs, 1H), 3.15 (t,  $J = 7.3$  Hz, 2H), 7.15 (d,  $J = 8.7$  Hz, 1H), 7.32 (t,  $J = 7.6$  Hz, 1H), 7.45–7.52 (m, 2H), 7.63 (d,  $J = 8.7$  Hz, 1H), 7.77 (d,  $J = 8.2$  Hz, 1H), 7.87 (d,  $J = 8.7$  Hz, 1H);  $^{13}\text{C NMR}$  ( $\text{CDCl}_3$ , 100 MHz)  $\delta$  19.3, 29.7, 42.2, 72.1, 119.0, 120.7, 122.6, 122.8, 126.2, 127.7, 128.6, 129.3, 133.0, 151.3.

### Synthesis of 1n:

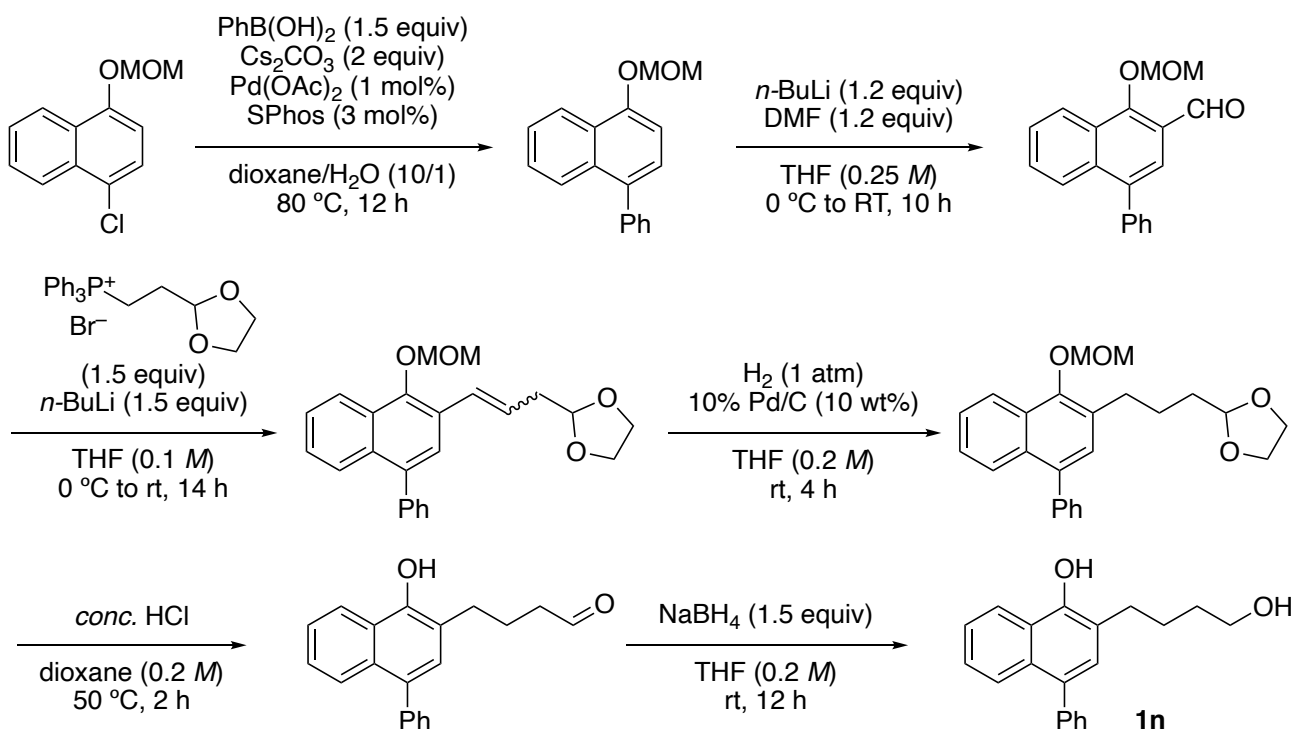

To a solution of 1-chloro-4-(methoxymethoxy)naphthalene<sup>7</sup> (2.22 g, 10.0 mmol), Cs<sub>2</sub>CO<sub>3</sub> (6.51 g, 20.0 mmol) and phenylboronic acid (1.83 g, 15.0 mmol) in degassed dioxane (50.0 mL) and H<sub>2</sub>O (5.00 mL) were added Pd(OAc)<sub>2</sub> (0.0224 g, 0.100 mmol) and SPhos (0.123 g, 0.300 mmol) at room temperature. After stirring for 12 h at 80 °C, resulting mixture was poured into H<sub>2</sub>O (20 mL), and the aqueous layers were extracted with EtOAc (twice). The combined organic layers were washed with brine and dried over anhydrous MgSO<sub>4</sub>, then the solvents were removed *in vacuo*. The residue was purified by flash column chromatography on silica gel (E. Merck Art. 9385, eluent: hexane-EtOAc = 20:1) to give 1-(methoxymethoxy)-2,4-dimethylbenzene (2.46 g, 9.31 mmol, 93% yield).

To a solution of this MOM ether (1.32 g, 5.00 mmol) in THF (20.0 mL) was added *n*BuLi (3.75 mL, 6.00 mmol, 1.6 M in hexane) dropwise at 0 °C. After stirring for 1 h at room temperature, to the reaction mixture was added anhydrous DMF (0.777 mL, 10.0 mmol) at room temperature. After stirring for 10 h, the resulting mixture was quenched by saturated aqueous NH<sub>4</sub>Cl (10 mL). The aqueous layers were extracted with EtOAc (twice). The combined organic layers were washed with brine and dried over anhydrous MgSO<sub>4</sub>, then the solvents were removed *in vacuo*. The residue was purified by flash column chromatography on silica gel (E. Merck Art. 9385, eluent: hexane-EtOAc = 10:1) to give 2-(methoxymethoxy)-3,5-dimethylbenzaldehyde (0.925 g, 3.16 mmol, 63% yield).

To a solution of 2-(1,3-dioxolan-2-yl)ethyltriphenylphosphonium bromide (2.32 g, 5.25 mmol) in THF (17.5 mL) was added *n*BuLi (3.28 mL, 5.25 mmol, 1.6 M in hexane) dropwise at 0 °C. After stirring for 1 h at 0 °C, to the resulting mixture was added aldehyde (0.925 g, 3.16 mmol) in THF (17.5 mL) dropwise at 0 °C. After stirring for 14 h, the resulting mixture was quenched by saturated aqueous NH<sub>4</sub>Cl (10 mL). The aqueous layers were extracted with EtOAc (twice). The combined organic layers were washed with brine and dried over anhydrous MgSO<sub>4</sub>, then the solvents were removed *in vacuo*. The residue was purified by flash column chromatography on silica gel (E. Merck Art. 9385, eluent: hexane-EtOAc = 10:1) to give 2-(3-(1-(methoxymethoxy)-4-phenylnaphthalen-2-yl)allyl)-1,3-dioxolane (1.20 g, 3.16 mmol, >99% yield).

To a solution of this olefin (1.20 g, 3.16 mmol) in THF (15.8 mL) was added 10% Pd/C (0.120 g). The flask containing the mixture was then evacuated and purged with H<sub>2</sub> three times. In an H<sub>2</sub> gas environment, the resulting mixture was stirred at room temperature for 4 h. Upon the completion of the reaction, the mixture was filtered through celite with EtOAc and the crude product was obtained after removal of the solvent *in vacuo*.

Without further purification, to a solution of this acetal in dioxane (15.8 mL) was added *conc.* HCl aq. (ca. 0.100 mL). After stirring for 2 h at 50 °C, the reaction mixture was cooled to room temperature, and to the mixture was added water (20 mL) and the aqueous layers were extracted with EtOAc (twice). The combined organic layers were washed with brine and dried over anhydrous MgSO<sub>4</sub>, then the solvents were removed *in vacuo*.



Without further purification, to a solution of this aldehyde in THF (15.8 mL) was added NaBH<sub>4</sub> (0.182 g, 4.80 mmol) at 0 °C. After stirring for 12 h at room temperature, to the mixture was added water (10 mL) and the aqueous layers were extracted with EtOAc (twice). The combined organic layers were washed with brine and dried over anhydrous MgSO<sub>4</sub>, then the solvents were removed *in vacuo*. The residue was purified by flash column chromatography on silica gel (E. Merck Art. 9385, eluent: hexane-EtOAc = 4:1) to give **1m** (0.687g, 2.35 mmol, 74% yield, 3 steps).

**2-(4-Hydroxybutyl)-4-phenylnaphthalen-1-ol (1m):** White solid; TLC, *R*<sub>f</sub> = 0.28 (hexane–EtOAc = 1:1); IR (KBr) 3500, 2948, 1578, 1415, 1226, 1067, 955, 701 cm<sup>-1</sup>; <sup>1</sup>H NMR (CDCl<sub>3</sub>, 400 MHz) δ 1.62–1.68 (m, 2H), 1.79 (brs, 1H), 1.86–1.93 (m, 2H), 2.91–2.95 (m, 2H), 3.88–3.91 (m, 2H), 7.11 (s, 1H), 7.19 (s, 1H), 7.37–7.40 (m, 2H), 7.44–7.50 (m, 5H), 7.85 (d, *J* = 8.2 Hz, 1H), 8.29 (d, *J* = 8.2 Hz, 1H); <sup>13</sup>C NMR (C<sub>6</sub>D<sub>6</sub>, 100 MHz) δ 28.8, 29.1, 29.6, 64.2, 120.7, 122.9, 125.4, 126.0, 126.2, 126.4, 127.0, 128.6, 130.1, 130.8, 132.3, 133.0, 141.8, 149.9; HRMS (EI) *m/z* calcd for [C<sub>20</sub>H<sub>20</sub>O<sub>2</sub>]<sup>+</sup> 292.1463, found 292.1458.

### Synthesis of 3a:

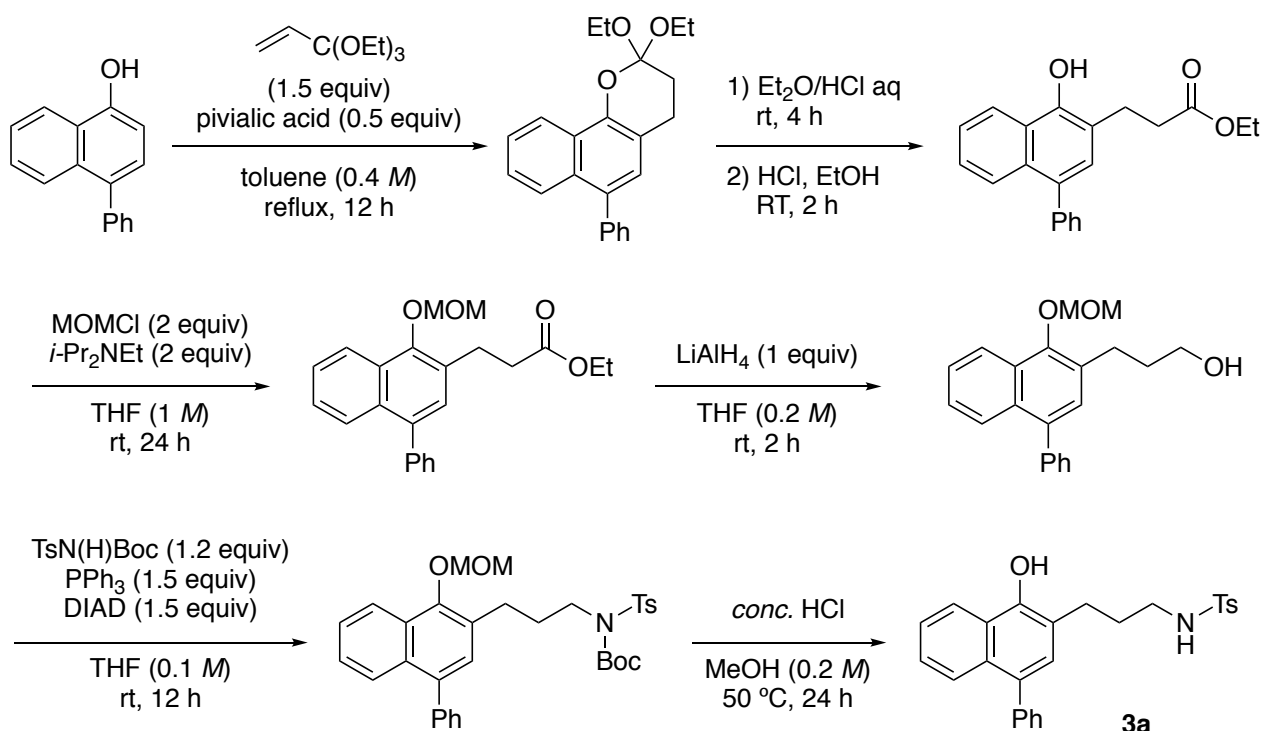

To a solution of 4-phenylnaphthalen-1-ol<sup>8</sup> (0.770 g, 3.50 mmol) and 3,3,3-triethoxyprop-1-ene<sup>9</sup> (0.653 mL, 5.25 mmol) in toluene (9.00 mL) was added pivalic acid (0.179 g, 1.75 mmol) at room temperature. After stirring for 12 h at 130 °C, the resulting mixture was poured into 2 M NaOH (10 mL), and the aqueous layers were extracted with Et<sub>2</sub>O (twice). The combined organic layers were washed with brine and dried over anhydrous MgSO<sub>4</sub>, then solvents were removed *in vacuo*.

Without further purification, to a solution of this acetal in Et<sub>2</sub>O (15.0 mL) was added 1 M HCl aq. (15.0 mL) at room temperature. After stirring for 4 h at room temperature, the resulting mixture was

poured into H<sub>2</sub>O (10 mL) and the aqueous layers were extracted with Et<sub>2</sub>O (twice). The combined organic layers were washed with brine and dried over anhydrous MgSO<sub>4</sub>, then solvents were removed *in vacuo*. To a solution of this residue in EtOH (10.0 mL) was added *conc.* HCl aq. (15.0 mL) at room temperature. After stirring for 2 h at 50 °C, the resulting mixture was poured into H<sub>2</sub>O (10 mL) and the aqueous layers were extracted with EtOAc (twice). The combined organic layers were washed with brine and dried over anhydrous MgSO<sub>4</sub>, then solvents were removed *in vacuo*.

Without further purification, to a solution of this phenol in THF (3.50 mL) was added diisopropylamine (1.22 mL, 7.00 mmol) and chloromethyl methyl ether (0.532 mL, 7.00 mmol) at 0 °C. After stirring for 24 h at room temperature, resulting mixture was poured into H<sub>2</sub>O (20 mL), and the aqueous layers were extracted with EtOAc (twice). The combined organic layers were washed with brine and dried over anhydrous MgSO<sub>4</sub>, then the solvents were removed *in vacuo*.

Without further purification, to a solution of this ether in THF (7.00 mL) was added LiAlH<sub>4</sub> (0.154 g, 3.50 mmol) at 0 °C. After stirring for 3 h at room temperature, resulting mixture was cooled at 0 °C and sequentially quenched by saturated aqueous Rochelle salt (15 mL). After stirring for 30 min at room temperature, the aqueous layers were extracted with EtOAc (twice). The combined organic layers were washed with brine and dried over anhydrous MgSO<sub>4</sub>, then the solvents were removed *in vacuo*.

To a solution of this alcohol, *N*-(*tert*-butoxycarbonyl)-*para*-toluenesulfonamide (1.14 g, 4.20 mmol) and PPh<sub>3</sub> (1.38 g, 5.25 mmol) in THF (35.0 mL) was added diisopropyl azodicarboxylate (2.78 mL, 5.25 mmol, 1.9 M in toluene) dropwise at 0 °C. After stirring for 12 h at room temperature, resulting mixture was poured into H<sub>2</sub>O (20 mL) and the aqueous layers were extracted with EtOAc (twice). The combined organic layers were washed with brine and dried over anhydrous MgSO<sub>4</sub>, then the solvents were removed *in vacuo*. The residue was purified by flash column chromatography on silica gel (E. Merck Art. 9385, eluent: hexane-EtOAc = 10:1) to give *tert*-butyl (3-(1-(methoxymethoxy)-4-phenylnaphthalen-2-yl)propyl)(tosyl)carbamate (1.37 g, 2.38 mmol, 68% yield, 5 steps).

To a solution of this amide (1.37 g, 2.38 mmol) in MeOH (11.9 mL) was added *conc.* HCl aq. (ca. 0.100 mL). After stirring for 24 h at 50 °C, the reaction mixture was cooled to room temperature, and to the mixture was added water (20 mL) and the aqueous layers were extracted with EtOAc (twice). The combined organic layers were washed with brine and dried over anhydrous MgSO<sub>4</sub>, then the solvents were removed *in vacuo*. The residue was purified by flash column chromatography on silica gel (E. Merck Art. 9385, eluent: hexane-EtOAc = 2:1) to give **3a** (0.772 g, 1.79 mmol, 75% yield).

***N*-(3-(1-Hydroxy-4-phenylnaphthalen-2-yl)propyl)-4-methylbenzenesulfonamide (3a):** White solid; TLC, *R*<sub>f</sub> = 0.56 (Hexane–EtOAc = 1:1); IR (KBr) 3465, 3262, 1392, 1321, 1159, 1139, 1091, 763, 705 cm<sup>-1</sup>; <sup>1</sup>H NMR (CDCl<sub>3</sub>, 400 MHz) δ 1.8–1.93 (m, 2H), 2.38 (s, 3H), 2.88 (t, *J* = 7.3 Hz, 2H),

2.97 (q,  $J = 6.1$  Hz, 2H), 4.85 (s, 1H), 5.82 (s, 1H), 7.11 (s, 1H), 7.25 (d,  $J = 7.8$  Hz, 3H), 7.38–7.52 (m, 7H), 7.74 (d,  $J = 8.2$  Hz, 2H), 7.85 (d,  $J = 8.7$  Hz, 1H), 8.15 (d,  $J = 8.7$  Hz, 1H);  $^{13}\text{C}$  NMR ( $\text{CDCl}_3$ , 100 MHz)  $\delta$  21.5, 26.2, 29.7, 42.2, 120.1, 121.2, 124.9, 125.3, 125.7, 126.0, 126.9, 127.1, 128.2, 129.1, 129.7, 130.2, 131.3, 133.2, 136.2, 140.6, 143.6, 148.0; HRMS (FAB)  $m/z$  calcd for  $[\text{C}_{26}\text{H}_{25}\text{NO}_3\text{S}]^+$  431.1555, found 431.1562.

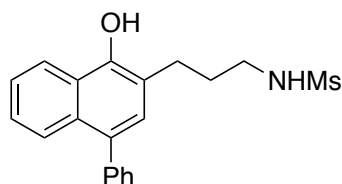

***N*-(3-(1-Hydroxy-4-phenylnaphthalen-2-yl)propyl)methanesulfonamide (3aa):**<sup>1</sup> White solid; TLC,  $R_f = 0.44$  (hexane–EtOAc = 1:2);  $^1\text{H}$  NMR ( $\text{DMSO}-d_6$ , 400 MHz)  $\delta$  1.81 (quin,  $J = 7.3$  Hz, 2H), 2.81–2.85 (m, 2H), 2.88 (s, 3H), 2.99–3.03 (m, 2H), 7.01 (brs, 1H), 7.22 (s, 1H), 7.38–7.52 (m, 7H), 7.74 (d,  $J = 8.2$  Hz, 1H), 8.28 (d,  $J = 8.2$  Hz, 1H), 9.20 (brs, 1H);  $^{13}\text{C}$  NMR ( $\text{DMSO}-d_6$ , 100 MHz)  $\delta$  27.0, 30.3, 39.3, 42.4, 121.8, 122.4, 124.8, 125.0, 125.5, 125.6, 126.9, 128.4, 129.8, 130.0, 130.6, 131.0, 140.4, 149.1.

#### Synthesis of 3ab:

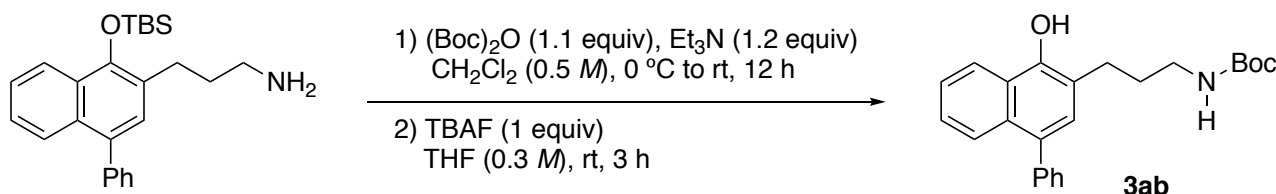

To a solution of 3-(1-((*tert*-butyldimethylsilyl)oxy)-4-phenylnaphthalen-2-yl)propan-1-amine<sup>1</sup> (0.392 g, 1.00 mmol) in  $\text{CH}_2\text{Cl}_2$  (2.00 mL) were added triethylamine (0.167 mL, 1.20 mmol) and  $(\text{Boc})_2\text{O}$  (0.240 mL, 1.10 mmol) at 0 °C. The reaction mixture was allowed to warm to room temperature. After stirring for 12 h, the resulting mixture was quenched by saturated aqueous  $\text{NH}_4\text{Cl}$  (10 mL). The aqueous layers were extracted with  $\text{CH}_2\text{Cl}_2$  (twice) and the organic layers were washed with brine. The combined organic layers were dried over anhydrous  $\text{Na}_2\text{SO}_4$ , then the solvents were removed in *vacuo*. Without further purification, to a solution of this residue in THF (3.00 mL) was added TBAF (1.00 mL, 1.00 mmol, 1 *M* in THF) at room temperature. After stirring for 3 h, the resulting mixture was poured into  $\text{H}_2\text{O}$  (10 mL). The aqueous layers were extracted with EtOAc (twice) and the organic layers were washed with brine. The combined organic layers were dried over anhydrous  $\text{MgSO}_4$ . The solvents were removed in *vacuo*. The residue was purified by flash column chromatography on silica gel (E. Merck Art. 9385, eluent: hexane–EtOAc = 10:1) to give **3ab** (0.347 g, 0.920 mmol, 92% yield).

***tert*-Butyl (3-(1-hydroxy-4-phenylnaphthalen-2-yl)propyl)carbamate (3ab):** White solid; TLC,  $R_f = 0.66$  (Hexane–EtOAc = 1:1); IR (neat) 3414, 2976, 1684, 1510, 1392, 1367, 1163, 757  $\text{cm}^{-1}$ ;  $^1\text{H}$

**NMR** (CDCl<sub>3</sub>, 400 MHz)  $\delta$  1.50 (s, 9H), 1.88–1.94 (m, 2H), 2.87 (t,  $J$  = 6.6 Hz, 2H), 3.17 (q,  $J$  = 6.0 Hz, 2H), 4.86 (brs, 1H), 7.16 (d,  $J$  = 1.4 Hz, 1H), 7.37–7.50 (m, 7H), 7.84 (d,  $J$  = 8.7 Hz, 1H), 7.97 (brs, 1H), 8.37 (d,  $J$  = 8.2 Hz, 1H); **<sup>13</sup>C NMR** (CDCl<sub>3</sub>, 100 MHz)  $\delta$  26.7, 28.4, 32.7, 39.3, 80.1, 120.4, 120.5, 122.4, 125.0, 125.6, 125.7, 126.7, 128.1, 129.6, 130.2, 131.3, 132.6, 140.9, 149.0, 157.5; **HRMS** (FAB)  $m/z$  calcd for [C<sub>24</sub>H<sub>27</sub>NO<sub>3</sub>]<sup>+</sup> 377.1991, found 377.1987.

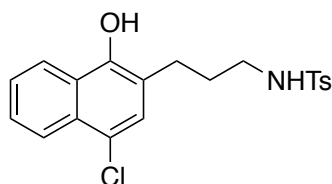

**N-(3-(4-Chloro-1-hydroxynaphthalen-2-yl)propyl)-4-methylbenzenesulfonamide (3b):** This compound was synthesized from 4-chloronaphthalen-1-ol as in **3a** in 43% yield (6 steps, 0.538 g, 1.38 mmol). Pale yellow solid; **TLC**,  $R_f$  = 0.51 (Hexane–EtOAc = 1:1); **IR** (KBr) 3447, 3278, 1595, 1449, 1314, 1264, 1243, 1153, 1139, 758, 673 cm<sup>-1</sup>; **<sup>1</sup>H NMR** (CDCl<sub>3</sub>, 400 MHz)  $\delta$  1.82–1.89 (m, 2H), 2.39 (s, 3H), 2.82 (t,  $J$  = 7.3 Hz, 2H), 2.94 (q,  $J$  = 6.3 Hz, 2H), 5.10 (t,  $J$  = 6.0 Hz, 1H), 6.12 (s, 1H), 7.23–7.27 (m, 3H), 7.50–7.58 (m, 2H), 7.74 (d,  $J$  = 8.2 Hz, 2H), 8.12–8.16 (m, 2H); **<sup>13</sup>C NMR** (CDCl<sub>3</sub>, 100 MHz)  $\delta$  21.5, 26.0, 29.5, 42.1, 121.0, 121.7, 123.3, 124.3, 126.0, 126.1, 126.6, 127.1, 127.7, 129.8, 130.2, 136.0, 143.8, 147.8.; **HRMS** (FAB)  $m/z$  calcd for [C<sub>20</sub>H<sub>20</sub><sup>35</sup>ClNO<sub>3</sub>S]<sup>+</sup>/[C<sub>20</sub>H<sub>20</sub><sup>37</sup>ClNO<sub>3</sub>S]<sup>+</sup> 389.0852/391.0823, found 389.0837/391.0836.

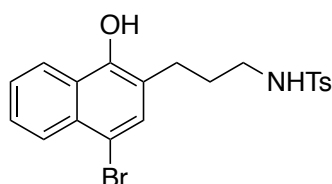

**N-(3-(4-Bromo-1-hydroxynaphthalen-2-yl)propyl)-4-methylbenzenesulfonamide (3c):** This compound was synthesized from 4-bromonaphthalen-1-ol as in **3a** in 40% yield (6 steps, 0.256 g, 0.598 mmol). Orange solid; **TLC**,  $R_f$  = 0.51 (Hexane–EtOAc = 1:1); **IR** (KBr) 3477, 3267, 1595, 1447, 1376, 1319, 1151, 1030, 907, 755, 668 cm<sup>-1</sup>; **<sup>1</sup>H NMR** (CDCl<sub>3</sub>, 400 MHz)  $\delta$  1.84–1.91 (m, 2H), 2.41 (s, 3H), 2.84 (t,  $J$  = 7.3 Hz, 2H), 2.95 (q,  $J$  = 6.3 Hz, 2H), 4.81 (t,  $J$  = 6.0 Hz, 1H), 5.99 (s, 1H), 7.28 (d,  $J$  = 8.2 Hz, 2H), 7.46 (s, 1H), 7.51–7.59 (m, 2H), 7.73–7.75 (m, 2H), 8.11–8.15 (m, 2H); **<sup>13</sup>C NMR** (CD<sub>2</sub>Cl<sub>2</sub>, 100 MHz)  $\delta$  21.6, 26.4, 30.0, 42.7, 113.5, 122.1, 122.3, 126.5, 126.6, 127.2, 127.4, 127.4, 130.2, 131.7, 131.9, 136.4, 144.4, 149.0; **HRMS** (FAB)  $m/z$  calcd for [C<sub>20</sub>H<sub>20</sub><sup>79</sup>BrNO<sub>3</sub>S+H]<sup>+</sup>/[C<sub>20</sub>H<sub>20</sub><sup>81</sup>BrNO<sub>3</sub>S+H]<sup>+</sup> 434.0426/436.0405, found 434.0412/436.0413.

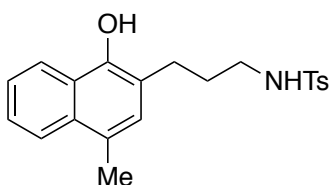

***N*-(3-(1-Hydroxy-4-methylnaphthalen-2-yl)propyl)-4-methylbenzenesulfonamide (3d):** This compound was synthesized from 4-chloronaphthalen-1-ol as in **3a** in 47% yield (6 steps, 0.733 g, 1.98 mmol). Pale yellow solid; **TLC**,  $R_f$  = 0.58 (Hexane–EtOAc = 1:1); **IR** (KBr) 3485, 3281, 2923, 1582, 1442, 1315, 1140, 1075, 762, 673  $\text{cm}^{-1}$ ;  **$^1\text{H}$  NMR** ( $\text{CDCl}_3$ , 400 MHz)  $\delta$  1.82–1.88 (m, 2H), 2.39 (s, 3H), 2.56 (s, 3H), 2.80 (t,  $J$  = 7.3 Hz, 2H), 2.92 (q,  $J$  = 6.3 Hz, 2H), 4.98 (s, 1H), 5.61 (s, 1H), 6.98 (s, 1H), 7.25 (d,  $J$  = 9.2 Hz, 2H), 7.47–7.52 (m, 2H), 7.73 (d,  $J$  = 8.2 Hz, 2H), 7.87–7.91 (m, 1H), 8.06–8.10 (m, 1H);  **$^{13}\text{C}$  NMR** ( $\text{CDCl}_3$ , 100 MHz)  $\delta$  18.7, 21.5, 26.0, 29.7, 42.1, 120.2, 121.4, 124.2, 125.0, 125.1, 125.3, 126.7, 127.1, 128.5, 129.7, 132.1, 136.3, 143.5, 146.8; **HRMS** (FAB)  $m/z$  calcd for  $[\text{C}_{21}\text{H}_{23}\text{NO}_3\text{S}]^+$  369.1399, found 369.1391.

### Synthesis of 3e:

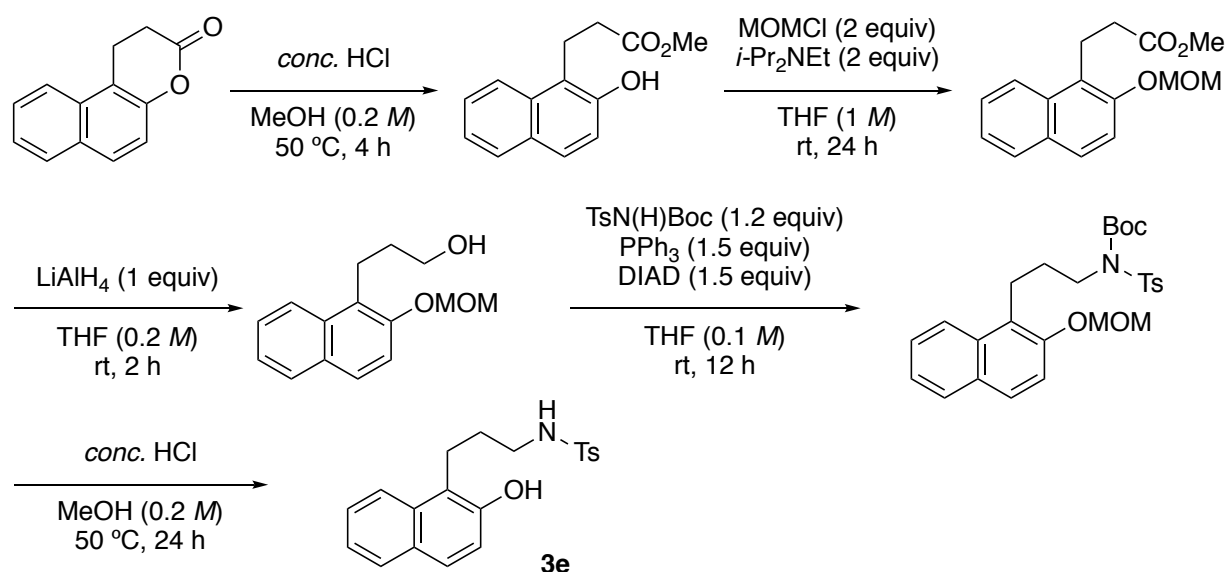

To a solution of 1,2-dihydro-3*H*-benzo[*f*]chromen-3-one<sup>6</sup> (0.793 g, 4.00 mmol) in MeOH (20.0 mL) was added *conc.* HCl aq. (ca. 0.100 mL). After stirring for 4 h at 50 °C, the reaction mixture was cooled to room temperature, and to the mixture was added water (20 mL) and the aqueous layers were extracted with EtOAc (twice). The combined organic layers were washed with brine and dried over anhydrous  $\text{MgSO}_4$ , then the solvents were removed *in vacuo* to give methyl 3-(2-hydroxynaphthalen-1-yl)propanoate. **3e** was synthesized from this compound as in **3a** in 66% yield (4 steps, 0.941 g, 2.64 mmol).

***N*-(3-(2-Hydroxynaphthalen-1-yl)propyl)-4-methylbenzenesulfonamide (3e):** White solid; **TLC**,  $R_f$  = 0.51 (Hexane–EtOAc = 1:1); **IR** (KBr) 3388, 3238, 1439, 1316, 1287, 1154, 1088, 814  $\text{cm}^{-1}$ ;  **$^1\text{H}$  NMR** ( $\text{CDCl}_3$ , 400 MHz)  $\delta$  1.83–1.89 (m, 2H), 2.38 (s, 3H), 2.89 (q,  $J$  = 6.3 Hz, 2H), 3.11 (t,  $J$  = 6.9 Hz, 2H), 5.61 (s, 1H), 6.20 (s, 1H), 7.06 (d,  $J$  = 9.2 Hz, 1H), 7.24 (d,  $J$  = 8.2 Hz, 2H), 7.31 (t,  $J$  = 7.3 Hz, 1H), 7.42–7.46 (m, 1H), 7.59 (d,  $J$  = 8.7 Hz, 1H), 7.72–7.80 (m, 4H);  **$^{13}\text{C}$  NMR** ( $\text{CDCl}_3$ , 100 MHz)  $\delta$  20.7, 21.4, 28.2, 41.8, 117.6, 117.9, 122.7, 123.0, 126.3, 127.0, 128.0, 128.6, 129.4, 129.7, 133.0, 136.5, 143.4, 150.8; **HRMS** (FAB)  $m/z$  calcd for  $[\text{C}_{20}\text{H}_{21}\text{NO}_3\text{S}+\text{H}]^+$  356.1320, found 356.1311.

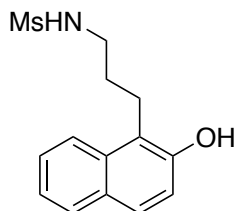

***N*-(3-(2-Hydroxynaphthalen-1-yl)propyl)methanesulfonamide (3ea):**<sup>10</sup> White solid; **TLC**,  $R_f$  = 0.48 (Hexane–EtOAc = 1:1); **<sup>1</sup>H NMR** (CDCl<sub>3</sub>, 400 MHz)  $\delta$  1.99–2.05 (m, 2H), 2.94 (s, 3H), 3.08 (q,  $J$  = 6.3 Hz, 2H), 3.21 (t,  $J$  = 6.9 Hz, 2H), 5.49 (t,  $J$  = 6.2 Hz, 1H), 6.45 (s, 1H), 7.10 (d,  $J$  = 8.7 Hz, 1H), 7.34 (t,  $J$  = 7.3 Hz, 1H), 7.47–7.51 (m, 1H), 7.63 (d,  $J$  = 9.2 Hz, 1H), 7.77 (d,  $J$  = 8.2 Hz, 1H), 7.88 (d,  $J$  = 8.7 Hz, 1H); **<sup>13</sup>C NMR** (CDCl<sub>3</sub>, 100 MHz)  $\delta$  20.8, 29.0, 40.1, 41.9, 117.5, 118.0, 122.7, 123.2, 126.6, 128.2, 128.7, 129.5, 133.1, 150.8.

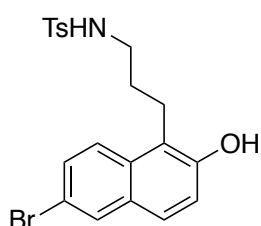

***N*-(3-(6-Bromo-2-hydroxynaphthalen-1-yl)propyl)-4-methylbenzenesulfonamide (3f):** This compound was synthesized from 8-bromo-1,2-dihydro-3*H*-benzo[*f*]chromen-3-one<sup>6</sup> as in **3e** in 53% yield (5 steps, 0.619 g, 1.42 mmol). White solid; **TLC**,  $R_f$  = 0.27 (Hexane–EtOAc = 1:1); **IR** (KBr) 3439, 3285, 1499, 1431, 1318, 1282, 1154, 812 cm<sup>-1</sup>; **<sup>1</sup>H NMR** (CDCl<sub>3</sub>, 400 MHz)  $\delta$  1.79–1.85 (m, 2H), 2.39 (s, 3H), 2.90 (q,  $J$  = 6.3 Hz, 2H), 3.08 (q,  $J$  = 7.0 Hz, 2H), 5.55 (t,  $J$  = 6.4 Hz, 1H), 6.41 (s, 1H), 7.09 (d,  $J$  = 8.7 Hz, 1H), 7.24 (d,  $J$  = 8.2 Hz, 2H), 7.46–7.51 (m, 2H), 7.64 (d,  $J$  = 9.2 Hz, 1H), 7.70–7.74 (m, 2H), 7.89 (d,  $J$  = 2.3 Hz, 1H); **<sup>13</sup>C NMR** (CDCl<sub>3</sub>, 100 MHz)  $\delta$  20.8, 21.5, 28.4, 41.9, 116.8, 118.5, 118.7, 124.6, 127.0, 127.1, 129.6, 129.7, 130.5, 130.6, 131.6, 136.5, 143.6, 151.0.; **HRMS** (FAB)  $m/z$  calcd for [C<sub>20</sub>H<sub>20</sub><sup>79</sup>BrNO<sub>3</sub>S+H]<sup>+</sup>/[C<sub>20</sub>H<sub>20</sub><sup>81</sup>BrNO<sub>3</sub>S+H]<sup>+</sup> 434.0426/436.0405, found 434.0418/436.0389.

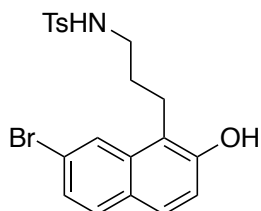

***N*-(3-(7-Bromo-2-hydroxynaphthalen-1-yl)propyl)-4-methylbenzenesulfonamide (3g):** This compound was synthesized from 9-bromo-1,2-dihydro-3*H*-benzo[*f*]chromen-3-one<sup>6</sup> as in **3e** in 43% yield (5 steps, 0.564 g, 1.30 mmol). White solid; **TLC**,  $R_f$  = 0.48 (Hexane–EtOAc = 1:1); **IR** (KBr) 3419, 3307, 1626, 1501, 1320, 1262, 1152, 1080, 830 cm<sup>-1</sup>; **<sup>1</sup>H NMR** (CDCl<sub>3</sub>, 400 MHz)  $\delta$  1.79–1.86 (m, 2H), 2.39 (s, 3H), 2.91 (q,  $J$  = 6.3 Hz, 2H), 3.04 (t,  $J$  = 6.9 Hz, 2H), 5.64 (t,  $J$  = 6.4 Hz, 1H), 6.65 (s, 1H), 7.09 (d,  $J$  = 8.7 Hz, 1H), 7.24 (s, 1H), 7.38 (dd,  $J$  = 8.7, 1.6 Hz, 1H), 7.55 (d,  $J$  = 8.7 Hz, 1H),

7.60 (d,  $J = 8.7$  Hz, 1H), 7.73 (d,  $J = 8.2$  Hz, 2H), 7.90 (d,  $J = 1.6$  Hz, 1H);  $^{13}\text{C}$  NMR ( $\text{CDCl}_3$ , 100 MHz)  $\delta$  20.8, 21.5, 28.3, 41.9, 117.5, 118.0, 121.1, 125.0, 126.5, 127.0, 127.8, 128.0, 129.8, 130.3, 134.4, 136.5, 143.6, 151.6; HRMS (FAB)  $m/z$  calcd for  $[\text{C}_{20}\text{H}_{20}^{79}\text{BrNO}_3\text{S}+\text{H}]^+ / [\text{C}_{20}\text{H}_{20}^{81}\text{BrNO}_3\text{S}+\text{H}]^+$  434.0426/436.0405, found 434.0431/436.0407.

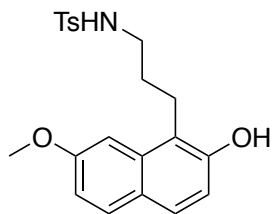

**N-(3-(2-Hydroxy-7-methoxynaphthalen-1-yl)propyl)-4-methylbenzenesulfonamide (3h):** This compound was synthesized from 9-methoxy-1,2-dihydro-3*H*-benzo[*f*]chromen-3-one<sup>6</sup> as in **3e** in 40% yield (5 steps, 0.381 g, 0.989 mmol). Pale yellow solid; TLC,  $R_f = 0.57$  (Hexane–EtOAc = 1:1); IR (KBr) 3398, 3349, 1628, 1514, 1291, 1221, 1146, 828, 659  $\text{cm}^{-1}$ ;  $^1\text{H}$  NMR ( $\text{CD}_3\text{CN}$ , 500 MHz)  $\delta$  1.69–1.75 (m, 2H), 2.38 (s, 3H), 2.87 (q,  $J = 6.8$  Hz, 2H), 2.96 (t,  $J = 7.5$  Hz, 2H), 3.88 (s, 3H), 5.59 (t,  $J = 6.1$  Hz, 1H), 6.93–6.97 (m, 2H), 7.00 (s, 1H), 7.13–7.14 (m, 1H), 7.29–7.32 (m, 2H), 7.54 (d,  $J = 8.9$  Hz, 1H), 7.61–7.64 (m, 2H), 7.67 (d,  $J = 9.2$  Hz, 1H);  $^{13}\text{C}$  NMR ( $\text{CD}_3\text{CN}$ , 125 MHz)  $\delta$  21.5, 22.4, 29.7, 43.8, 55.9, 102.7, 115.9, 115.9, 119.0, 125.4, 127.8, 128.3, 130.6, 131.0, 135.5, 138.3, 144.3, 153.1, 159.3; HRMS (FAB)  $m/z$  calcd for  $[\text{C}_{21}\text{H}_{23}\text{NO}_4\text{S}+\text{H}]^+$  386.1426, found 386.1419.

### Synthesis of 3i:

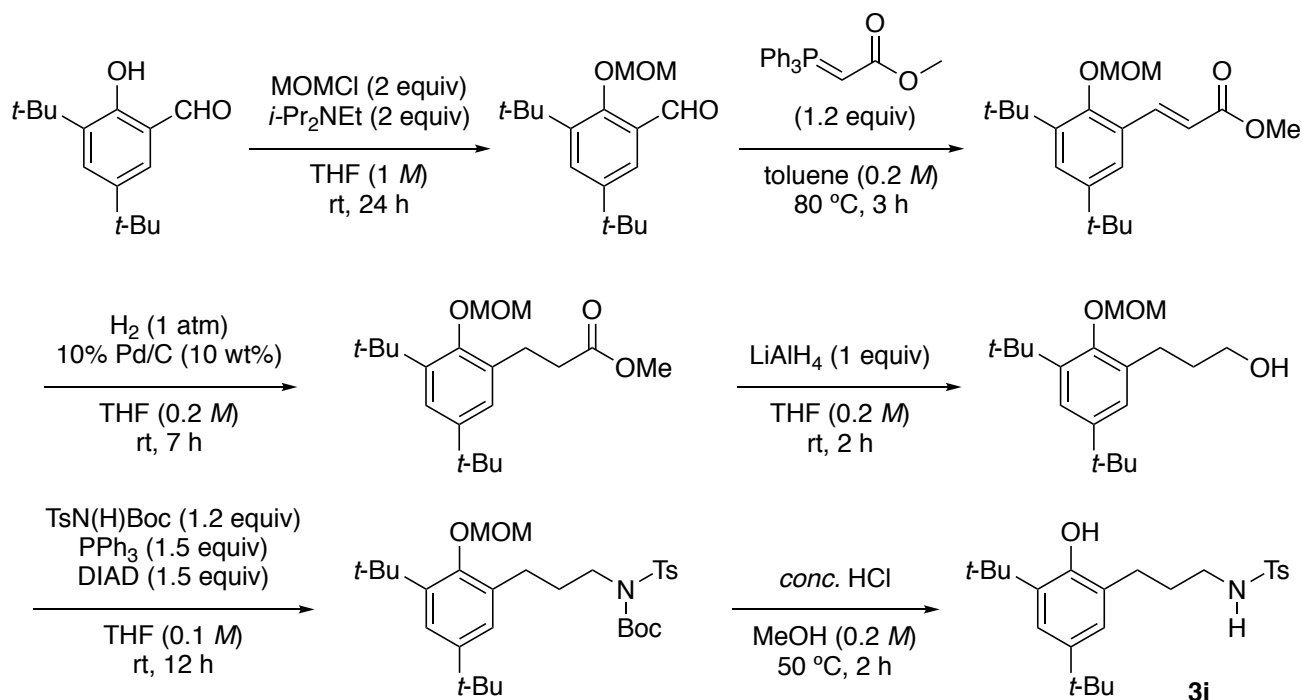

To a solution of 3,5-di-*tert*-butyl-2-hydroxybenzaldehyde (1.17 g, 5.00 mmol) in THF (5.00 mL) were added diisopropylamine (1.74 mL, 10.0 mmol) and chloromethyl methyl ether (0.759 mL, 10.0 mmol) at 0 °C. After stirring for 24 h at room temperature, resulting mixture was poured into  $\text{H}_2\text{O}$  (20

mL), and the aqueous layers were extracted with EtOAc (twice). The combined organic layers were washed with brine and dried over anhydrous MgSO<sub>4</sub>, then the solvents were removed *in vacuo*.

Without further purification, to a solution of this aldehyde in toluene (25.0 mL) was added methyl(triphenylphosphoranylidene)acetate (2.01 g, 6.00 mmol) at room temperature. After stirring for 3 h at 80 °C, the resulting mixture was cooled to room temperature and diluted with water and EtOAc. The aqueous layers were separated and extracted with EtOAc (twice). The combined organic layers were washed with brine and dried over anhydrous MgSO<sub>4</sub>, then the solvents were removed *in vacuo*. The residue was purified by flash chromatography on silica gel (E. Merck Art. 9385, eluent: hexane–EtOAc = 10:1) to give methyl (*E*)-3-(3,5-di-*tert*-butyl-2-(methoxymethoxy)phenyl)acrylate (1.66 g, 5.00 mmol, >99% yield).

To a solution of this olefin (1.66 g, 5.00 mmol) in THF (25.0 mL) was added 10% Pd/C (0.166 g). The flask containing the mixture was then evacuated and purged with H<sub>2</sub> three times. In an H<sub>2</sub> gas environment, the resulting mixture was stirred at room temperature for 7 h. Upon the completion of the reaction, the mixture was filtered through celite with EtOAc and the crude product was obtained after removal of the solvent *in vacuo*.

Without further purification, to a solution of this ester in THF (25.0 mL) was added LiAlH<sub>4</sub> (0.190 g, 5.00 mmol) at 0 °C. After stirring for 3 h at room temperature, resulting mixture was cooled at 0 °C and sequentially quenched by saturated aqueous Rochelle salt (15 mL). After stirring for 30 min at room temperature, the aqueous layers were extracted with EtOAc (twice). The combined organic layers were washed with brine and dried over anhydrous MgSO<sub>4</sub>, then the solvents were removed *in vacuo*.

Without further purification, to a solution of this alcohol, *N*-(*tert*-Butoxycarbonyl)-*para*-toluenesulfonamide (1.67 g, 6.00 mmol) and PPh<sub>3</sub> (1.97 g, 7.50 mmol) in THF (50.0 mL) was added diisopropyl azodicarboxylate (3.94 mL, 7.50 mmol, 1.9 M in toluene) dropwise at 0 °C. After stirring for 12 h at room temperature, resulting mixture was poured into H<sub>2</sub>O (30 mL) and the aqueous layers were extracted with EtOAc (twice). The combined organic layers were washed with brine and dried over anhydrous MgSO<sub>4</sub>, then the solvents were removed *in vacuo*. The residue was purified by flash column chromatography on silica gel (E. Merck Art. 9385, eluent: hexane–EtOAc = 10:1) to give *N*-(3-(3,5-di-*tert*-butyl-2-hydroxyphenyl)propyl)-4-methylbenzenesulfonamide (2.51 g, 4.47 mmol, 89% yield, 3 steps).

To a solution of this amide (2.51 g, 4.47 mmol) in MeOH (22.4 mL) was added *conc.* HCl aq. (ca. 0.100 mL). After stirring for 24 h at 50 °C, the reaction mixture was cooled to room temperature, and to the mixture was added water (20 mL) and the aqueous layers were extracted with EtOAc (twice). The combined organic layers were washed with brine and dried over anhydrous MgSO<sub>4</sub>, then the solvents were removed *in vacuo*. The residue was purified by flash column chromatography on silica gel (E. Merck Art. 9385, eluent: hexane–EtOAc = 2:1) to give **3i** (1.44 g, 3.44 mmol, 79% yield).



***N*-(3-(3,5-Di-*tert*-butyl-2-hydroxyphenyl)propyl)-4-methylbenzenesulfonamide (3i):** White solid; **TLC**,  $R_f$  = 0.76 (Hexane–EtOAc = 1:1); **IR** (KBr) 3529, 3308, 2957, 2866, 1597, 1480, 1288, 1148, 813, 665  $\text{cm}^{-1}$ ;  **$^1\text{H}$  NMR** ( $\text{CDCl}_3$ , 400 MHz)  $\delta$  1.26 (s, 9H), 1.40 (s, 9H), 1.75–1.82 (m, 2H), 2.42 (s, 3H), 2.61 (t,  $J$  = 7.6 Hz, 2H), 2.98 (q,  $J$  = 6.0 Hz, 2H), 4.82–4.94 (m, 2H), 6.92 (d,  $J$  = 2.5 Hz, 1H), 7.16 (d,  $J$  = 2.5 Hz, 1H), 7.30 (d,  $J$  = 8.0 Hz, 2H), 7.76 (d,  $J$  = 8.0 Hz, 2H);  **$^{13}\text{C}$  NMR** ( $\text{CDCl}_3$ , 100 MHz)  $\delta$  21.5, 27.2, 29.8, 30.0, 31.6, 34.2, 34.6, 42.6, 122.1, 124.7, 126.5, 127.1, 129.7, 135.2, 136.6, 142.5, 143.5, 149.9.; **HRMS** (FAB)  $m/z$  calcd for  $[\text{C}_{24}\text{H}_{35}\text{NO}_3\text{S}]^+$  417.2338, found 417.2342.

### Synthesis of 3j:

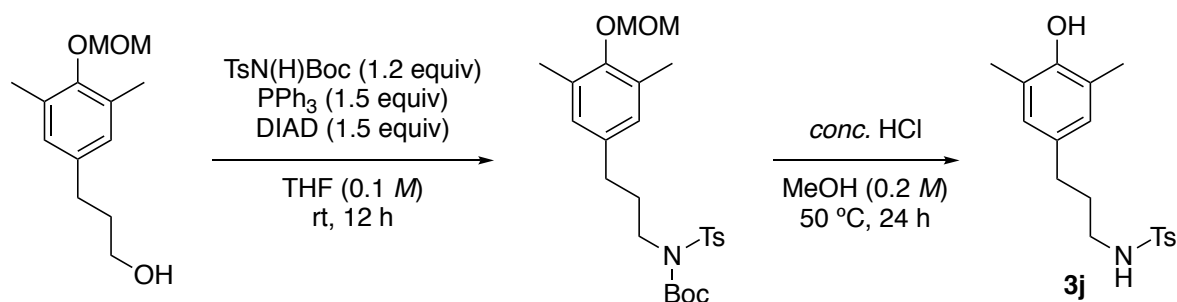

To a solution of 3-(4-(methoxymethoxy)-3,5-dimethylphenyl)propan-1-ol (0.561 g, 2.50 mmol), *N*-(*tert*-Butoxycarbonyl)-*para*-toluenesulfonamide (0.814 g, 3.00 mmol) and  $\text{PPh}_3$  (0.983 g, 3.75 mmol) in THF (25.0 mL) was added diisopropyl azodicarboxylate (1.97 mL, 3.75 mmol, 1.9 M in toluene) dropwise at 0 °C. After stirring for 12 h at room temperature, resulting mixture was poured into  $\text{H}_2\text{O}$  (30 mL) and the aqueous layers were extracted with EtOAc (twice). The combined organic layers were washed with brine and dried over anhydrous  $\text{MgSO}_4$ , then the solvents were removed *in vacuo*. The residue was purified by flash column chromatography on silica gel (E. Merck Art. 9385, eluent: hexane-EtOAc = 10:1) to give *tert*-butyl (3-(4-(methoxymethoxy)-3,5-dimethylphenyl)propyl)(tosyl)carbamate (1.19 g, 2.50 mmol, >99%).

To a solution of this amide (1.19 g, 2.50 mmol) in MeOH (12.5 mL) was added *conc.* HCl aq. (ca. 0.100 mL). After stirring for 24 h at 50 °C, the reaction mixture was cooled to room temperature, and to the mixture was added water (20 mL) and the aqueous layers were extracted with EtOAc (twice). The combined organic layers were washed with brine and dried over anhydrous  $\text{MgSO}_4$ , then the solvents were removed *in vacuo*. The residue was purified by flash column chromatography on silica gel (E. Merck Art. 9385, eluent: hexane-EtOAc = 2:1) to give **3j** (0.653 g, 1.95 mmol, 78% yield).

***N*-(3-(4-Hydroxy-3,5-dimethylphenyl)propyl)-4-methylbenzenesulfonamide (3j):** White solid; **TLC**,  $R_f$  = 0.64 (Hexane–EtOAc = 1:1); **IR** (KBr) 3467, 3260, 2924, 1598, 1487, 1427, 1315, 1208, 1149, 1093, 815, 690  $\text{cm}^{-1}$ ;  **$^1\text{H}$  NMR** ( $\text{CDCl}_3$ , 400 MHz)  $\delta$  1.68–1.75 (m, 2H), 2.19 (s, 6H), 2.43–2.48 (m, 2H), 2.43 (s, 3H), 2.95 (q,  $J$  = 6.7 Hz, 2H), 4.35 (brs, 1H), 4.50 (s, 1H), 6.69 (s, 2H), 7.30 (d,  $J$  = 8.0 Hz, 2H), 7.73 (d,  $J$  = 8.0 Hz, 2H);  **$^{13}\text{C}$  NMR** ( $\text{CDCl}_3$ , 100 MHz)  $\delta$  15.9, 21.5, 31.3, 31.8, 42.6, 76.7,

77.0, 77.3, 122.9, 127.1, 128.4, 129.6, 132.3, 136.8, 143.3, 150.4.; **HRMS** (FAB) m/z calcd for  $[\text{C}_{18}\text{H}_{23}\text{NO}_3\text{S}+\text{H}]^+$  334.1477, found 334.1469.

## Procedures for Oxidation and Characterization of Products

### Representative Procedures for Oxidative Dearomative Spiroetherification of Arenols 1

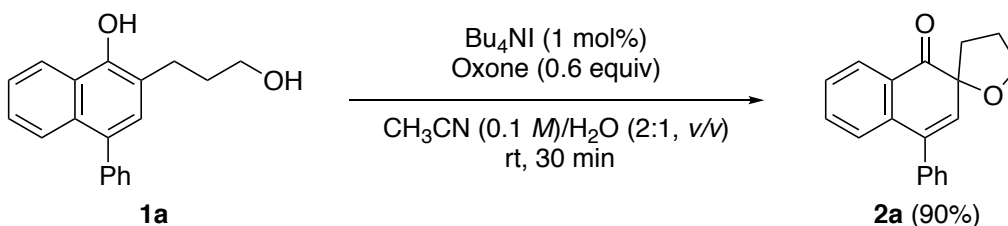

To a solution of **1a** (0.278 g, 1.00 mmol) and  $\text{Bu}_4\text{NI}$  (0.00369 g, 0.0100 mmol, 1 mol%) in  $\text{CH}_3\text{CN}$  (10.0 mL) and  $\text{H}_2\text{O}$  (5.00 mL) was added oxone (0.368 g, 0.600 mmol) at room temperature. The reaction was monitored by TLC analysis. After stirring for 30 min, the reaction was quenched by saturated aqueous  $\text{Na}_2\text{S}_2\text{O}_3$  (10 mL) at 0 °C. The aqueous layers were extracted with EtOAc (twice). The combined organic layers were washed with brine and dried over anhydrous  $\text{MgSO}_4$ . The solvents were removed *in vacuo*. The residue was purified by flash column chromatography on silica gel (E. Merck Art. 9385, eluent: hexane–EtOAc = 10:1) to give **2a** (0.252 g, 0.913 mmol) in 91% yield.

**4'-Phenyl-4,5-dihydro-1H,3H-spiro[furan-2,2'-naphthalen]-1-one (2a):**<sup>1</sup> White solid; TLC,  $R_f$  = 0.36 (hexane–EtOAc = 4:1);  $^1\text{H}$  NMR ( $\text{CDCl}_3$ , 400 MHz)  $\delta$  1.97–2.12 (m, 2H), 2.20–2.37 (m, 2H), 4.16 (q,  $J$  = 7.2 Hz, 1H), 4.30–4.35 (m, 1H), 6.11 (s, 1H), 7.10 (d,  $J$  = 7.8 Hz, 1H), 7.34–7.50 (m, 7H), 8.04 (dd,  $J$  = 7.6, 1.1 Hz, 1H);  $^{13}\text{C}$  NMR ( $\text{CDCl}_3$ , 100 MHz)  $\delta$  25.3, 36.6, 70.4, 84.3, 126.6, 127.4, 127.8, 128.0, 128.4, 128.8, 129.1, 134.2, 135.0, 137.4, 137.7, 138.5, 201.5.

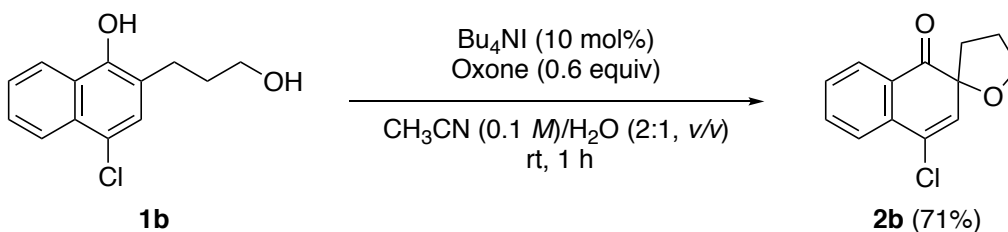

**4'-Chloro-4,5-dihydro-1H,3H-spiro[furan-2,2'-naphthalen]-1-one (2b):**<sup>2</sup> 0.0166 g, 0.0701 mmol. This compound was purified by flash column chromatography on silica gel (E. Merck Art. 9385, eluent: hexane–EtOAc = 10:1). Pale yellow solid; TLC,  $R_f$  = 0.46 (hexane–EtOAc = 4:1);  $^1\text{H}$  NMR ( $\text{CDCl}_3$ , 400 MHz)  $\delta$  1.93–2.10 (m, 2H), 2.19–2.30 (m, 2H), 4.12–4.18 (m, 1H), 4.26–4.31 (m, 1H), 6.36 (s, 1H), 7.45 (td,  $J$  = 7.4, 1.3 Hz, 1H), 7.65–7.72 (m, 2H), 8.01 (dd,  $J$  = 7.4, 1.3 Hz, 1H);  $^{13}\text{C}$  NMR ( $\text{CDCl}_3$ , 100 MHz)  $\delta$  25.3, 36.5, 70.6, 84.6, 125.4, 127.4, 128.8, 129.1, 129.2, 133.3, 134.8, 134.9, 199.5.

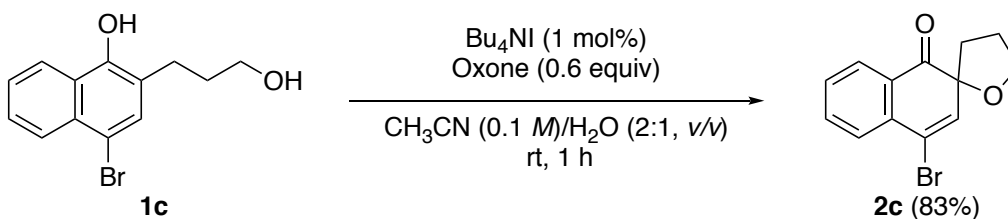

**4'-Bromo-4,5-dihydro-1'H,3H-spiro[furan-2,2'-naphthalen]-1'-one (2c):**<sup>2</sup> 0.0231 g, 0.0827 mmol. This compound was purified by flash column chromatography on silica gel (E. Merck Art. 9385, eluent: hexane–EtOAc = 10:1). Brwon oil; **TLC**,  $R_f$  = 0.45 (hexane–EtOAc = 4:1); **<sup>1</sup>H NMR** (CDCl<sub>3</sub>, 400 MHz)  $\delta$  1.94–2.12 (m, 2H), 2.18–2.29 (m, 2H), 4.12–4.18 (m, 1H), 4.26–4.31 (m, 1H), 6.63 (s, 1H), 7.41–7.45 (m, 1H), 7.64–7.69 (m, 2H), 7.98 (d,  $J$  = 8.2 Hz, 1H); **<sup>13</sup>C NMR** (CDCl<sub>3</sub>, 100 MHz)  $\delta$  25.2, 36.3, 70.6, 85.5, 119.7, 127.3, 128.1, 128.8, 129.2, 134.8, 135.5, 137.7, 199.6.

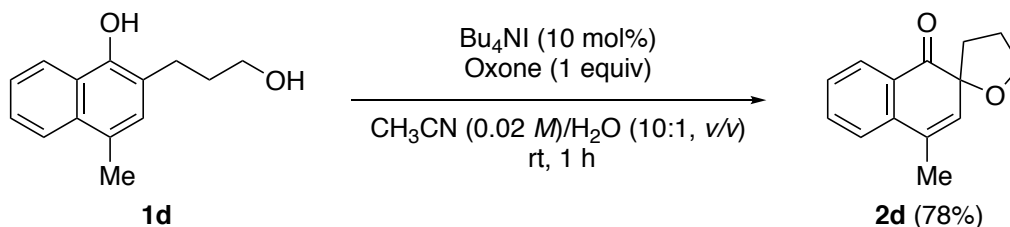

hexane–EtOAc = 4:1). Yellow oil; **TLC**,  $R_f$  = 0.65 (hexane–EtOAc = 1:1); **IR** (neat) 2952, 1682, 1554, 1479, 1225, 1201, 1064, 816  $\text{cm}^{-1}$ ;  **$^1\text{H}$  NMR** ( $\text{CDCl}_3$ , 400 MHz)  $\delta$  1.81–1.88 (m, 1H), 2.01–2.21 (m, 2H), 2.40–2.46 (m, 1H), 4.33–4.44 (m, 2H), 6.14 (d,  $J$  = 10.1 Hz, 1H), 7.28 (d,  $J$  = 10.1 Hz, 1H), 7.43 (d,  $J$  = 8.2 Hz, 2H), 7.49–7.51 (m, 1H);  **$^{13}\text{C}$  NMR** ( $\text{CDCl}_3$ , 100 MHz)  $\delta$  24.5, 40.4, 71.9, 87.6, 121.5, 125.2, 127.1, 131.4, 131.5, 132.8, 142.9, 144.1, 202.8; **HRMS** (FAB)  $m/z$  calcd for  $[\text{C}_{13}\text{H}_{11}^{79}\text{BrO}_2+\text{H}]^+ / [\text{C}_{13}\text{H}_{11}^{81}\text{BrO}_2+\text{H}]^+$  279.0021/281.0001, found 279.0021/281.0003.

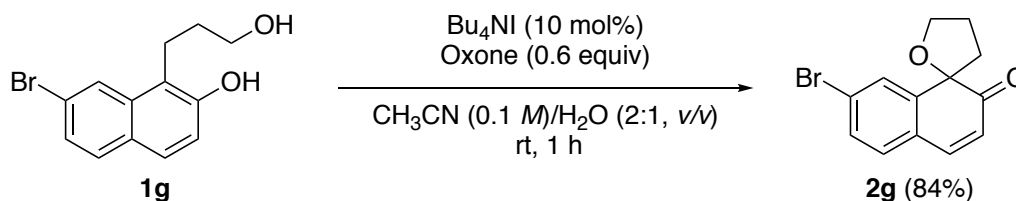

**7'-Bromo-4,5-dihydro-2'H,3H-spiro[furan-2,1'-naphthalen]-2'-one (2g)**: 0.0234 g, 0.0838 mmol. This compound was purified by flash column chromatography on silica gel (E. Merck Art. 9385, eluent: hexane–EtOAc = 4:1). Yellow oil; **TLC**,  $R_f$  = 0.65 (hexane–EtOAc = 1:1); **IR** (neat) 2975, 1682, 1584, 1384, 1129, 1078, 1061, 838  $\text{cm}^{-1}$ ;  **$^1\text{H}$  NMR** ( $\text{CDCl}_3$ , 400 MHz)  $\delta$  1.84–1.91 (m, 1H), 2.03–2.22 (m, 2H), 2.41–2.48 (m, 1H), 4.36–4.45 (m, 2H), 6.12 (d,  $J$  = 10.1 Hz, 1H), 7.14 (d,  $J$  = 8.1 Hz, 1H), 7.31 (d,  $J$  = 10.1 Hz, 1H), 7.43 (dd,  $J$  = 8.1, 2.0 Hz, 1H), 7.70 (d,  $J$  = 2.0 Hz, 1H);  **$^{13}\text{C}$  NMR** ( $\text{CDCl}_3$ , 100 MHz)  $\delta$  24.4, 40.5, 72.0, 87.4, 124.3, 125.0, 128.5, 128.6, 130.3, 131.0, 143.4, 147.2, 202.6; **HRMS** (FAB)  $m/z$  calcd for  $[\text{C}_{13}\text{H}_{11}^{79}\text{BrO}_2+\text{H}]^+ / [\text{C}_{13}\text{H}_{11}^{81}\text{BrO}_2+\text{H}]^+$  279.0021/281.0001, found 279.0024/281.0005.

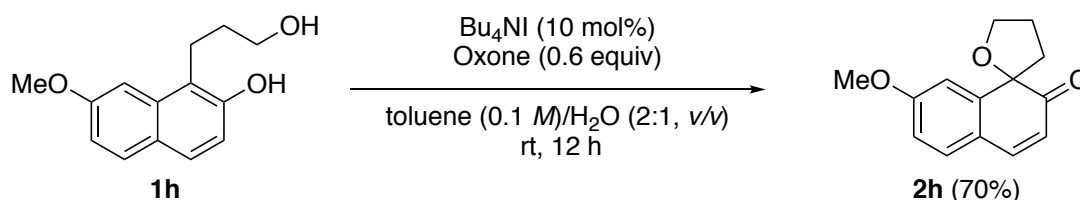

**7'-Methoxy-4,5-dihydro-2'H,3H-spiro[furan-2,1'-naphthalen]-2'-one (2h)**: 0.0161 g, 0.0699 mmol. This compound was purified by flash column chromatography on silica gel (E. Merck Art. 9385, eluent: hexane–EtOAc = 4:1). Yellow oil; **TLC**,  $R_f$  = 0.60 (hexane–EtOAc = 1:1); **IR** (neat) 2950, 1675, 1602, 1321, 1284, 1227, 1061, 833  $\text{cm}^{-1}$ ;  **$^1\text{H}$  NMR** ( $\text{CDCl}_3$ , 400 MHz)  $\delta$  1.83–1.90 (m, 1H), 2.02–2.21 (m, 2H), 2.40–2.47 (m, 1H), 3.86 (s, 3H), 4.34–4.46 (m, 2H), 5.97 (d,  $J$  = 9.8 Hz, 1H), 6.79 (dd,  $J$  = 8.2, 2.5 Hz, 1H), 7.11 (d,  $J$  = 2.5 Hz, 1H), 7.21 (d,  $J$  = 8.2 Hz, 1H), 7.31 (d,  $J$  = 9.8 Hz, 1H);  **$^{13}\text{C}$  NMR** ( $\text{CDCl}_3$ , 100 MHz)  $\delta$  24.4, 40.9, 55.4, 71.9, 88.0, 111.6, 112.6, 121.4, 122.8, 130.8, 144.4, 147.9, 161.5, 203.7; **HRMS** (FAB)  $m/z$  calcd for  $[\text{C}_{14}\text{H}_{14}\text{O}_3+\text{H}]^+$  231.1021, found 231.1021.

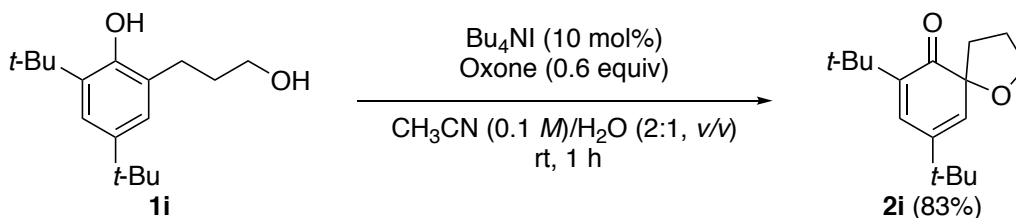

**4'-Methyl-4,5-dihydro-1'H,3H-spiro[furan-2,2'-naphthalen]-1'-one (2i):** 0.0218 g, 0.0832 mmol. This compound was purified by flash column chromatography on silica gel (E. Merck Art. 9385, eluent: hexane–EtOAc = 10:1). Yellow oil; **TLC**,  $R_f$  = 0.43 (hexane–EtOAc = 4:1); **IR** (KBr) 2960, 1680, 1459, 1366, 1272, 1030  $\text{cm}^{-1}$ ;  **$^1\text{H}$  NMR** ( $\text{CDCl}_3$ , 400 MHz)  $\delta$  1.11 (s, 9H), 1.22 (s, 9H), 1.70–1.78 (m, 1H), 1.91–2.01 (m, 1H), 2.05–2.18 (m, 2H), 4.08–4.14 (m, 1H), 4.22–4.27 (m, 1H), 5.96 (d,  $J$  = 2.7 Hz, 1H), 6.80 (d,  $J$  = 2.7 Hz, 1H);  **$^{13}\text{C}$  NMR** ( $\text{CDCl}_3$ , 100 MHz)  $\delta$  24.7, 28.6, 29.2, 34.1, 34.3, 35.7, 70.5, 86.7, 132.0, 134.8, 141.4, 143.4, 204.9; **HRMS** (FAB+)  $m/z$  calcd for  $[\text{C}_{17}\text{H}_{26}\text{O}_2 + \text{H}]^+$  263.2011, found 263.2001.

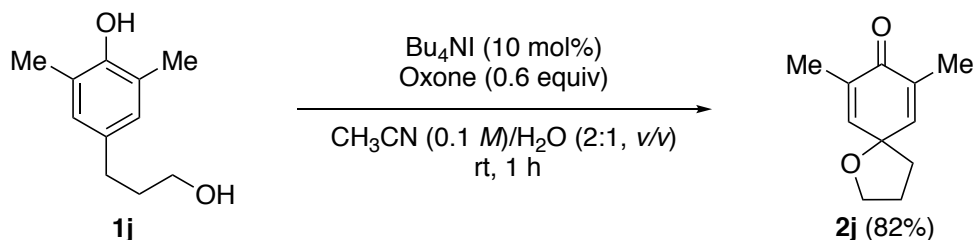

**7,9-Dimethyl-1-oxaspiro[4.5]deca-6,9-dien-8-one (2j):** 0.0146 g, 0.0819 mmol. This compound was purified by flash column chromatography on silica gel (E. Merck Art. 9385, eluent: hexane–EtOAc = 4:1). Colorless oil; **TLC**,  $R_f$  = 0.30 (hexane–EtOAc = 4:1); **IR** (neat) 2952, 1675, 1642, 1447, 1373, 1032, 762  $\text{cm}^{-1}$ ;  **$^1\text{H}$  NMR** ( $\text{CDCl}_3$ , 400 MHz)  $\delta$  1.87 (s, 6H), 1.99–2.03 (m, 2H), 2.11–2.18 (m, 2H), 4.05 (t,  $J$  = 6.6 Hz, 2H), 6.56 (s, 2H);  **$^{13}\text{C}$  NMR** ( $\text{CDCl}_3$ , 100 MHz)  $\delta$  15.8, 26.8, 36.7, 68.8, 77.5, 133.5, 144.7, 186.9; **HRMS** (FAB)  $m/z$  calcd for  $[\text{C}_{11}\text{H}_{14}\text{O}_2 + \text{H}]^+$  179.1072, found 179.1073.

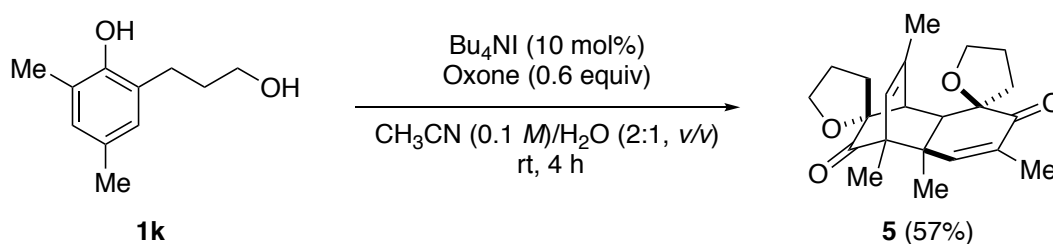

**(1'R\*,2R\*,4'R\*,4a'R\*,10'R\*)-2',4',4a',6'-Tetramethyl-1',4,4',4a',5,5'',8a'-octahydro-3H,3''H,7'H-dispiro[furan-2,8'-[1,4]ethanonaphthalene-10',2''-furan]-7',9'-dione (5):** 0.0101 g, 0.0285 mmol. This compound was purified by flash column chromatography on silica gel (E. Merck Art. 9385, eluent: hexane–EtOAc = 10:1). White solid; **TLC**,  $R_f$  = 0.20 (hexane–EtOAc = 1:1); **IR** (neat) 3406, 1722, 1691, 1451, 1375, 1032  $\text{cm}^{-1}$ ;  **$^1\text{H}$  NMR** ( $\text{CDCl}_3$ , 500 MHz)  $\delta$  1.16 (s, 3H), 1.26 (s, 3H), 1.59–1.66 (m, 1H), 1.78 (d,  $J$  = 1.5 Hz, 3H), 1.79 (d,  $J$  = 1.5 Hz, 3H), 1.80–1.98 (m, 6H), 2.05–

2.13 (m, 1H), 2.54 (d,  $J = 1.5$  Hz, 1H), 2.93 (t,  $J = 2.1$  Hz, 1H), 3.93–4.07 (m, 4H), 5.04 (t,  $J = 1.8$  Hz, 1H), 5.94 (s, 1H);  $^{13}\text{C}$  NMR ( $\text{CDCl}_3$ , 125 MHz)  $\delta$  12.5, 16.7, 21.7, 23.9, 24.9, 26.2, 34.8, 39.8, 45.5, 48.6, 49.9, 58.3, 68.6, 69.6, 82.1, 85.7, 128.1, 135.5, 143.4, 145.2, 199.8, 213.1; HRMS (FAB)  $m/z$  calcd for  $[\text{C}_{22}\text{H}_{28}\text{O}_4+\text{H}]^+$  357.2066, found 358.2063.

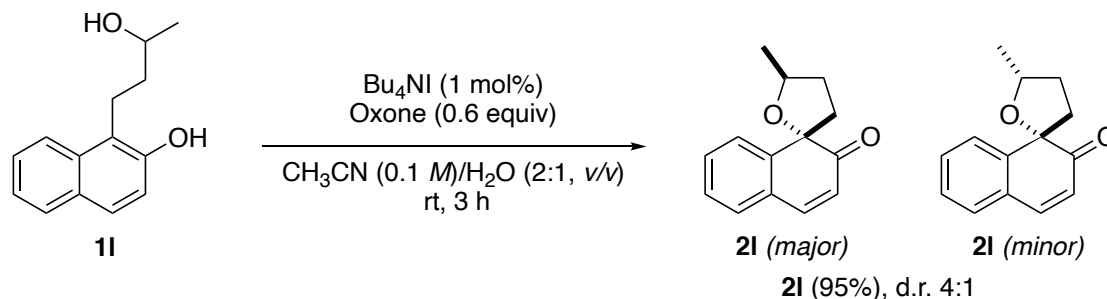

**(2*S*\*,5*S*\*)-5-Methyl-4,5-dihydro-2'*H*,3*H*-spiro[furan-2,1'-naphthalen]-2'-one (major) (2l):**<sup>3</sup> 0.0169 g, 0.0789 mmol. The diastereomer ratio (d.r. 4:1) was determined by crude  $^1\text{H}$  NMR. This compound was purified by flash column chromatography on silica gel (E. Merck Art. 9385, eluent: hexane–EtOAc = 20:1 to 15:1). Yellow oil; TLC,  $R_f$  = 0.32 (hexane–EtOAc = 4:1);  $^1\text{H}$  NMR ( $\text{CDCl}_3$ , 400 MHz)  $\delta$  1.49 (d,  $J = 6.4$  Hz, 3H), 1.64–1.73 (m, 1H), 1.89–1.95 (m, 1H), 2.14–2.22 (m, 1H), 2.38–2.45 (m, 1H), 4.66–4.74 (m, 1H), 6.09 (d,  $J = 10.1$  Hz, 1H), 7.26–7.41 (m, 4H), 7.60 (d,  $J = 7.3$  Hz, 1H);  $^{13}\text{C}$  NMR ( $\text{CDCl}_3$ , 100 MHz)  $\delta$  20.9, 31.9, 40.6, 78.8, 88.1, 124.0, 125.4, 127.7, 129.1, 129.5, 130.1, 144.6, 145.4, 204.2.

**(2*S*\*,5*R*\*)-5-Methyl-4,5-dihydro-2'*H*,3*H*-spiro[furan-2,1'-naphthalen]-2'-one (minor):** 0.00345 g, 0.0161 mmol. This compound was purified by flash column chromatography on silica gel (E. Merck Art. 9385, eluent: hexane–EtOAc = 15:1 to 10:1). Yellow oil; TLC,  $R_f$  = 0.35 (hexane–EtOAc = 4:1);  $^1\text{H}$  NMR ( $\text{CDCl}_3$ , 500 MHz)  $\delta$  1.55 (d,  $J = 6.1$  Hz, 3H), 1.81–1.95 (m, 2H), 2.03–2.08 (m, 1H), 2.47–2.51 (m, 1H), 4.64–4.70 (m, 1H), 6.10 (d,  $J = 10.1$  Hz, 1H), 7.24–7.31 (m, 2H), 7.33 (d,  $J = 10.1$  Hz, 1H), 7.39 (td,  $J = 7.4, 1.5$  Hz, 1H), 7.58–7.59 (m, 1H);  $^{13}\text{C}$  NMR ( $\text{CDCl}_3$ , 125 MHz)  $\delta$  20.8, 31.4, 41.3, 79.8, 88.6, 124.0, 125.4, 127.6, 128.9, 129.6, 130.2, 144.1, 146.1, 202.8.

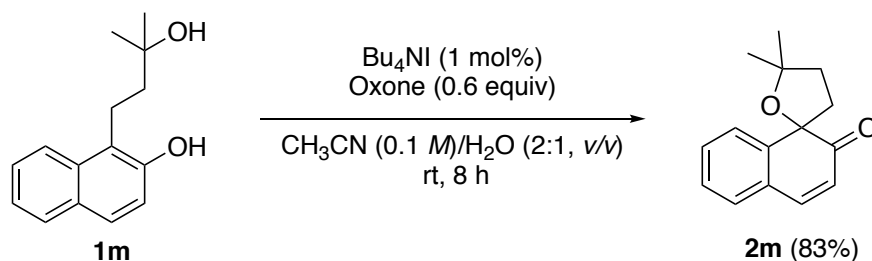

**5,5-Dimethyl-4,5-dihydro-2'*H*,3*H*-spiro[furan-2,1'-naphthalen]-2'-one (2m):**<sup>3</sup> 0.0189 g, 0.0827 mmol. This compound was purified by flash column chromatography on silica gel (E. Merck Art. 9385, eluent: hexane–EtOAc = 20:1). Yellow oil; TLC,  $R_f$  = 0.70 (hexane–EtOAc = 1:1);  $^1\text{H}$  NMR ( $\text{CDCl}_3$ , 400 MHz)  $\delta$  1.55 (s, 3H), 1.64 (s, 3H), 1.79–1.86 (m, 1H), 1.96–2.06 (m, 2H), 2.45–2.54 (m, 1H), 6.08 (d,  $J = 10.1$  Hz, 1H), 7.24–7.32 (m, 3H), 7.39 (td,  $J = 7.5, 1.7$  Hz, 1H), 7.66 (d,  $J = 7.5$  Hz,

1H); <sup>13</sup>C NMR (CDCl<sub>3</sub>, 100 MHz) δ 28.0, 28.8, 35.9, 40.1, 84.8, 89.9, 124.1, 125.4, 127.6, 129.0, 129.8, 130.1, 144.0, 145.7, 203.4.

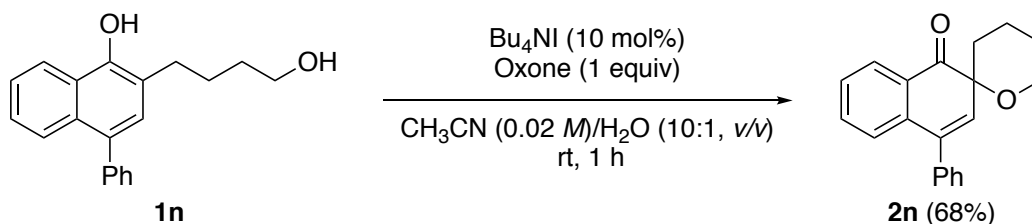

**4-Phenyl-3',4',5',6'-tetrahydro-1H-spiro[naphthalene-2,2'-pyran]-1-one (2n):** 0.0197 g, 0.0678 mmol. This compound was purified by flash column chromatography on silica gel (E. Merck Art. 9385, eluent: hexane–EtOAc = 15:1). Pale yellow solid; **TLC**,  $R_f$  = 0.49 (hexane–EtOAc = 4:1); **IR** (neat) 2935, 1693, 1592, 1443, 1274, 1199, 1078, 775 cm<sup>-1</sup>; **<sup>1</sup>H NMR** (CDCl<sub>3</sub>, 400 MHz) δ 1.59–2.01 (m, 6H), 3.94–4.00 (m, 1H), 4.29–4.34 (m, 1H), 6.39 (s, 1H), 7.07 (d,  $J$  = 7.3 Hz, 1H), 7.32–7.49 (m, 7H), 7.99 (dd,  $J$  = 7.3, 1.4 Hz, 1H); **<sup>13</sup>C NMR** (CDCl<sub>3</sub>, 100 MHz) δ 19.1, 25.2, 33.8, 63.2, 77.7, 126.4, 127.5, 127.9, 128.2, 128.4, 128.9, 130.0, 132.5, 134.0, 136.9, 137.5, 138.8, 201.5; **HRMS** (FAB)  $m/z$  calcd for [C<sub>20</sub>H<sub>18</sub>O<sub>2</sub>+H]<sup>+</sup> 291.1385, found 291.1384.

### Representative Procedures for Oxidative Dearomative Spiroamination of Arenols 3

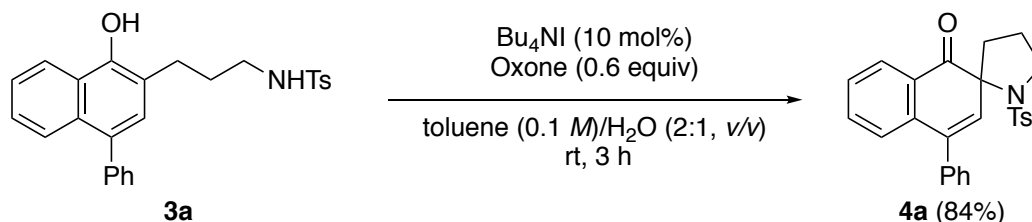

To a solution of **3a** (0.0431 g, 0.100 mmol) and Bu<sub>4</sub>NI (0.00369 g, 0.0100 mmol, 10 mol%) in toluene (1.00 mL) and H<sub>2</sub>O (0.500 mL) was added oxone (0.0368 g, 0.0600 mmol) at room temperature. The reaction was monitored by TLC analysis. After stirring for 3 h, the reaction was quenched by saturated aqueous Na<sub>2</sub>S<sub>2</sub>O<sub>3</sub> (1 mL) at 0 °C. The aqueous layers were extracted with EtOAc (twice). The combined organic layers were washed with brine and dried over anhydrous MgSO<sub>4</sub>. The solvents were removed *in vacuo*. The residue was purified by flash column chromatography on silica gel (E. Merck Art. 9385, eluent: hexane–EtOAc = 10:1) to give **4a** (0.0361 g, 0.0842 mmol) in 84% yield.

**4-Phenyl-1'-tosyl-1H-spiro[naphthalene-2,2'-pyrrolidin]-1-one (4a):** White solid; **TLC**,  $R_f$  = 0.17 (hexane–EtOAc = 4:1); **IR** (neat) 2924, 1687, 1593, 1339, 1154 cm<sup>-1</sup>; **<sup>1</sup>H NMR** (CDCl<sub>3</sub>, 400 MHz) δ 1.98–2.12 (m, 2H), 2.18–2.29 (m, 2H), 2.37 (s, 3H), 3.58–3.64 (m, 1H), 3.66–3.72 (m, 1H), 6.11 (s, 1H), 7.16–7.20 (m, 3H), 7.36–7.52 (m, 7H), 7.70 (d,  $J$  = 8.2 Hz, 2H), 8.12 (d,  $J$  = 7.3 Hz, 1H); **<sup>13</sup>C NMR** (CDCl<sub>3</sub>, 100 MHz) δ 21.5, 23.2, 39.8, 48.9, 70.7, 126.8, 127.6, 127.8, 127.9, 128.0, 128.4, 128.8, 129.0, 129.2, 134.4, 135.3, 136.1, 137.2, 137.6, 138.5, 143.1, 198.3; **HRMS** (FAB)  $m/z$  calcd for [C<sub>26</sub>H<sub>23</sub>NO<sub>3</sub>S+H]<sup>+</sup> 430.1477, found 430.1475.



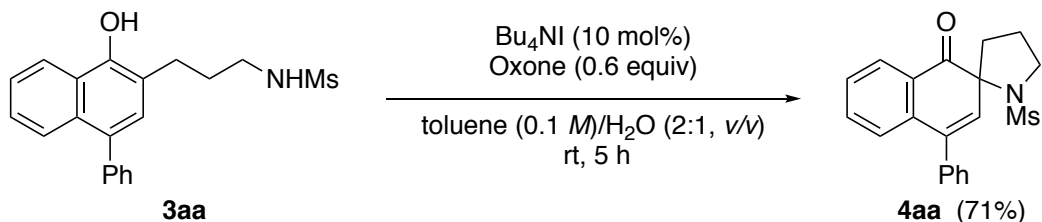

**1'-(Methylsulfonyl)-4-phenyl-1H-spiro[naphthalene-2,2'-pyrrolidin]-1-one (4aa):**<sup>1</sup> 0.0250 g, 0.0710 mmol. This compound was purified by flash column chromatography on silica gel (E. Merck Art. 9385, eluent: hexane–EtOAc = 10:1). White solid; **TLC**,  $R_f$  = 0.49 (hexane–EtOAc = 1:1); **<sup>1</sup>H NMR** (CDCl<sub>3</sub>, 400 MHz)  $\delta$  2.04–2.12 (m, 1H), 2.16–2.34 (m, 3H), 3.03 (s, 3H), 3.70–3.76 (m, 2H), 6.27 (s, 1H), 7.16 (d,  $J$  = 7.8 Hz, 1H), 7.36–7.44 (m, 6H), 7.51 (t,  $J$  = 7.6 Hz, 1H), 8.10 (d,  $J$  = 7.8 Hz, 1H); **<sup>13</sup>C NMR** (CDCl<sub>3</sub>, 100 MHz)  $\delta$  23.0, 39.6, 39.9, 49.3, 72.1, 126.8, 127.8(2C), 127.9, 128.4, 128.6, 129.1, 134.8, 135.3, 136.4, 138.1, 138.4, 199.3.

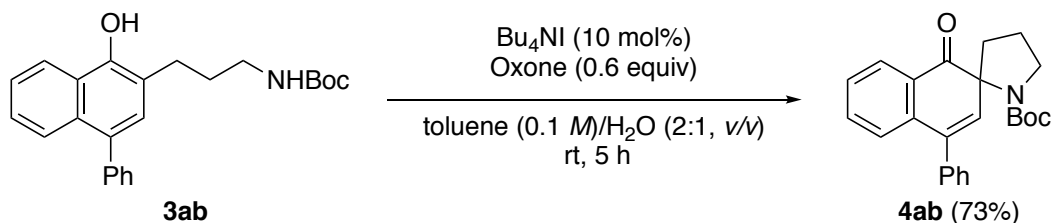

**tert-Butyl 1-oxo-4-phenyl-1H-spiro[naphthalene-2,2'-pyrrolidine]-1'-carboxylate (4ab):** 0.0274 g, 0.0732 mmol. This compound was purified by flash column chromatography on silica gel (E. Merck Art. 9385, eluent: hexane–EtOAc = 10:1). Pale yellow solid; **TLC**,  $R_f$  = 0.34 (hexane–EtOAc = 4:1); **IR** (neat) 2974, 1698, 1593, 1388, 1365, 1156, 775 cm<sup>-1</sup>; **<sup>1</sup>H NMR** (CDCl<sub>3</sub>, 400 MHz, two rotamers)  $\delta$  1.13 (s, 7.4H), 1.43 (s, 1.6H), 1.90–1.98 (m, 1H), 2.03–2.29 (m, 3H), 3.58–3.67 (m, 1H), 3.78–3.80 (m, 0.2H), 3.84–3.90 (m, 0.8H), 6.08 (s, 0.8H), 6.11 (s, 0.2H), 7.15 (q,  $J$  = 3.5 Hz, 1H), 7.31–7.52 (m, 8H), 8.11–8.12 (m, 0.2H), 8.16 (dd,  $J$  = 7.6, 1.1 Hz, 0.8H); **<sup>13</sup>C NMR** (CDCl<sub>3</sub>, 100 MHz, two rotamers)  $\delta$  22.4, 22.8, 28.0, 28.4, 38.1, 39.1, 47.9, 48.3, 67.9, 68.9, 76.7, 77.0, 77.3, 79.8, 80.1, 126.5, 127.5, 127.8, 127.8, 128.3, 128.5, 128.9, 129.2, 129.3, 134.0, 134.2, 135.3, 136.8, 137.1, 137.9, 138.0, 138.9, 139.0, 153.6, 199.5; **HRMS** (FAB)  $m/z$  calcd for [C<sub>24</sub>H<sub>25</sub>NO<sub>3</sub>+H]<sup>+</sup> 376.1913, found 376.1920.

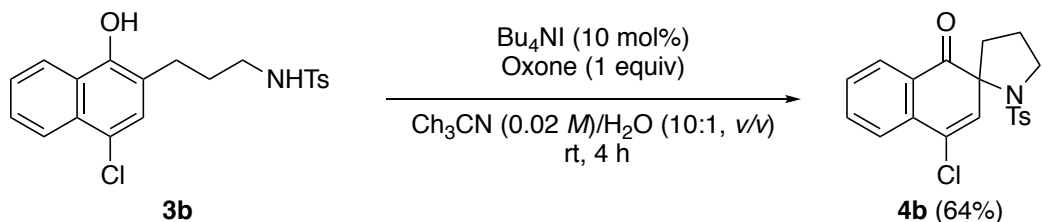

**4-Chloro-1'-tosyl-1H-spiro[naphthalene-2,2'-pyrrolidin]-1-one (4b):** 0.0248 g, 0.0639 mmol. This compound was purified by flash column chromatography on silica gel (E. Merck Art. 9385, eluent: hexane–EtOAc = 10:1). Pale yellow solid; **TLC**,  $R_f$  = 0.19 (hexane–EtOAc = 4:1); **IR** (neat) 2954, 1692, 1593, 1340, 1154, 1096, 664 cm<sup>-1</sup>; **<sup>1</sup>H NMR** (CDCl<sub>3</sub>, 400 MHz)  $\delta$  1.96–2.07 (m, 2H), 2.17–2.27

(m, 2H), 2.43 (s, 3H), 3.53–3.59 (m, 1H), 3.69–3.74 (m, 1H), 6.28 (s, 1H), 7.30 (d,  $J = 7.8$  Hz, 2H), 7.46–7.50 (m, 1H), 7.69–7.72 (m, 3H), 7.78 (d,  $J = 7.3$  Hz, 1H), 8.11 (dd,  $J = 7.8, 0.9$  Hz, 1H);  $^{13}\text{C}$  NMR ( $\text{CDCl}_3$ , 100 MHz)  $\delta$  21.5, 23.3, 39.7, 48.8, 71.0, 125.6, 127.6, 127.8, 128.4, 128.7, 129.3, 129.4, 133.0, 134.8, 134.9, 137.0, 143.4, 196.7; **HRMS** (FAB)  $m/z$  calcd for  $[\text{C}_{20}\text{H}_{18}^{35}\text{ClNO}_3\text{S}+\text{H}]^+ / [\text{C}_{20}\text{H}_{18}^{37}\text{ClNO}_3\text{S}+\text{H}]^+$  388.0774/390.0745, found 388.0780/390.0747.

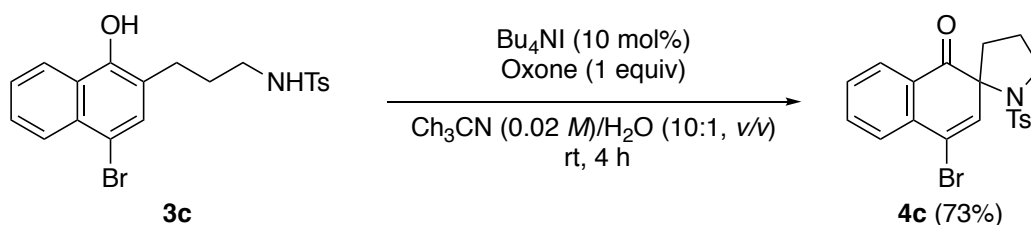

**4-Bromo-1'-tosyl-1H-spiro[naphthalene-2,2'-pyrrolidin]-1-one (4c):** 0.0317 g, 0.0733 mmol. This compound was purified by flash column chromatography on silica gel (E. Merck Art. 9385, eluent: hexane–EtOAc = 10:1). White solid; **TLC**,  $R_f = 0.19$  (hexane–EtOAc = 4:1); **IR** (neat) 2918, 1692, 1590, 1341, 1155, 1096, 663  $\text{cm}^{-1}$ ;  $^1\text{H}$  NMR ( $\text{CDCl}_3$ , 400 MHz)  $\delta$  1.94–2.07 (m, 2H), 2.16–2.27 (m, 2H), 2.43 (s, 3H), 3.52–3.58 (m, 1H), 3.73 (td,  $J = 7.9, 5.0$  Hz, 1H), 6.51 (s, 1H), 7.30 (d,  $J = 8.7$  Hz, 2H), 7.46 (td,  $J = 7.5, 1.1$  Hz, 1H), 7.67–7.76 (m, 4H), 8.09 (dd,  $J = 7.5, 1.1$  Hz, 1H);  $^{13}\text{C}$  NMR ( $\text{CDCl}_3$ , 100 MHz)  $\delta$  21.5, 23.3, 39.4, 48.8, 71.8, 119.1, 127.5, 127.7, 128.3, 128.8, 129.3, 129.4, 134.9, 135.3, 137.0, 137.2, 143.4, 196.6; **HRMS** (FAB)  $m/z$  calcd for  $[\text{C}_{20}\text{H}_{18}^{79}\text{BrNO}_3\text{S}+\text{H}]^+ / [\text{C}_{20}\text{H}_{18}^{81}\text{BrNO}_3\text{S}+\text{H}]^+$  432.0269/434.0249, found 432.0266/434.0235.

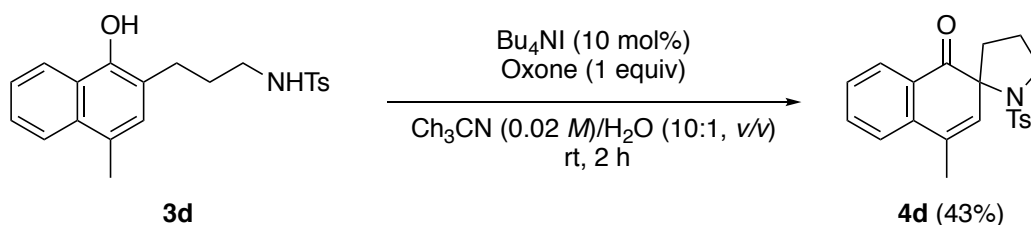

**4-Methyl-1'-tosyl-1H-spiro[naphthalene-2,2'-pyrrolidin]-1-one (4d):** 0.0158 g, 0.0429 mmol. This compound was purified by flash column chromatography on silica gel (E. Merck Art. 9385, eluent: hexane–EtOAc = 10:1). White solid; **TLC**,  $R_f = 0.19$  (hexane–EtOAc = 4:1); **IR** (neat) 2951, 1687, 1596, 1339, 1154, 1097, 671  $\text{cm}^{-1}$ ;  $^1\text{H}$  NMR ( $\text{CDCl}_3$ , 400 MHz)  $\delta$  1.93–2.02 (m, 2H), 2.12–2.21 (m, 2H), 2.42 (d,  $J = 1.4$  Hz, 3H), 3.56–3.67 (m, 2H), 6.00 (d,  $J = 1.4$  Hz, 1H), 7.27 (d,  $J = 8.2$  Hz, 2H), 7.36–7.40 (m, 2H), 7.63 (td,  $J = 7.6, 1.2$  Hz, 1H), 7.69–7.72 (m, 2H), 8.08 (dd,  $J = 8.2, 1.4$  Hz, 1H);  $^{13}\text{C}$  NMR ( $\text{CDCl}_3$ , 100 MHz)  $\delta$  19.3, 21.5, 23.1, 39.9, 48.8, 70.7, 124.5, 127.7, 127.7, 127.8, 128.7, 128.9, 129.2, 133.2, 134.7, 137.3, 138.3, 143.1, 198.7; **HRMS** (FAB)  $m/z$  calcd for  $[\text{C}_{21}\text{H}_{21}\text{NO}_3\text{S}+\text{H}]^+$  368.1820, found 368.1324.

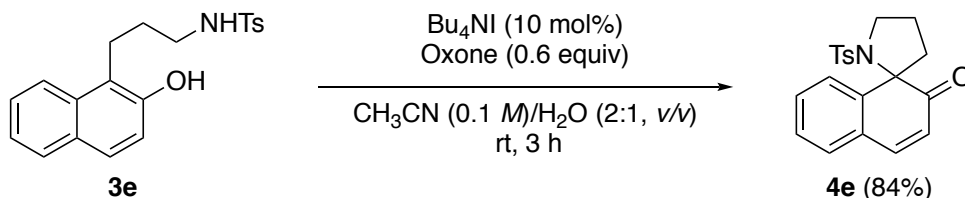

**1'-Tosyl-2H-spiro[naphthalene-1,2'-pyrrolidin]-2-one (4e):** 0.0298 g, 0.0843 mmol. This compound was purified by flash column chromatography on silica gel (E. Merck Art. 9385, eluent: hexane–EtOAc = 4:1). Pale white solid; **TLC**,  $R_f$  = 0.52 (hexane–EtOAc = 1:1); **IR** (neat) 2926, 1675, 1337, 1154, 1094, 1006, 754  $\text{cm}^{-1}$ ;  **$^1\text{H}$  NMR** ( $\text{CDCl}_3$ , 400 MHz)  $\delta$  1.94–2.00 (m, 1H), 2.04–2.21 (m, 2H), 2.29–2.36 (m, 1H), 2.42 (s, 3H), 3.70–3.81 (m, 2H), 6.22 (d,  $J$  = 9.6 Hz, 1H), 7.25–7.27 (m, 2H), 7.29–7.41 (m, 4H), 7.46 (d,  $J$  = 10.1 Hz, 1H), 7.62 (d,  $J$  = 8.2 Hz, 2H);  **$^{13}\text{C}$  NMR** ( $\text{CDCl}_3$ , 100 MHz)  $\delta$  21.7, 23.1, 44.2, 49.7, 75.1, 124.1, 126.5, 127.8, 127.9, 129.1, 129.2, 129.8, 130.3, 137.3, 143.2, 145.4, 145.8, 200.0; **HRMS** (FAB)  $m/z$  calcd for  $[\text{C}_{20}\text{H}_{19}\text{NO}_3\text{S}+\text{H}]^+$  354.1164, found 354.1163.

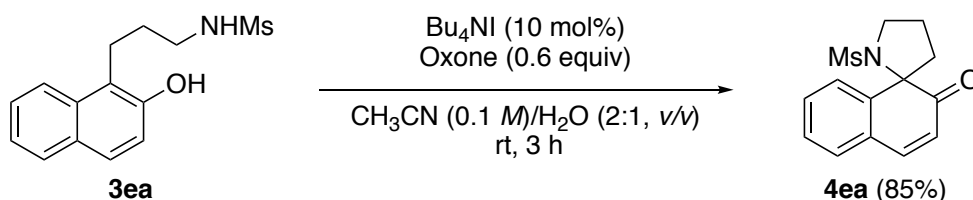

**1'-(Methylsulfonyl)-2H-spiro[naphthalene-1,2'-pyrrolidin]-2-one (4ea):**<sup>10</sup> 0.0235 g, 0.0847 mmol. This compound was purified by flash column chromatography on silica gel (E. Merck Art. 9385, eluent: hexane–EtOAc = 4:1). White solid; **TLC**,  $R_f$  = 0.33 (hexane–EtOAc = 1:1);  **$^1\text{H}$  NMR** ( $\text{CDCl}_3$ , 400 MHz)  $\delta$  1.99–2.05 (m, 1H), 2.14–2.20 (m, 2H), 2.34–2.41 (m, 1H), 3.10 (s, 3H), 3.73–3.78 (m, 1H), 3.93–3.98 (m, 1H), 6.17 (d,  $J$  = 10.1 Hz, 1H), 7.28–7.33 (m, 2H), 7.42–7.47 (m, 2H), 7.62 (d,  $J$  = 8.2 Hz, 1H);  **$^{13}\text{C}$  NMR** ( $\text{CDCl}_3$ , 100 MHz)  $\delta$  22.7, 39.9, 44.1, 49.9, 75.8, 123.7, 125.8, 127.7, 128.4, 129.8, 130.6, 145.9, 146.5, 200.5.

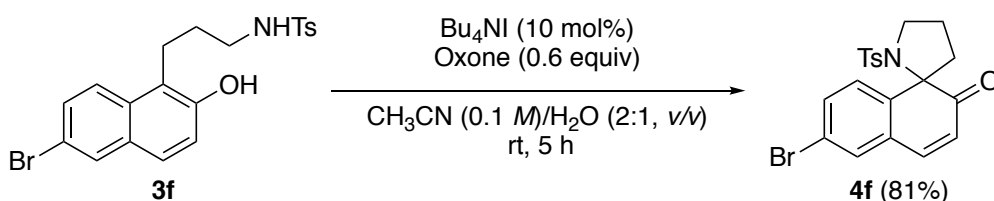

**6-Bromo-1'-tosyl-2H-spiro[naphthalene-1,2'-pyrrolidin]-2-one (4f):** 0.0352 g, 0.0814 mmol. This compound was purified by flash column chromatography on silica gel (E. Merck Art. 9385, eluent: hexane–EtOAc = 4:1). White solid; **TLC**,  $R_f$  = 0.57 (hexane–EtOAc = 1:1); **IR** (neat) 2916, 1678, 1337, 1154, 1096, 815, 754  $\text{cm}^{-1}$ ;  **$^1\text{H}$  NMR** ( $\text{CDCl}_3$ , 400 MHz)  $\delta$  1.91–1.97 (m, 1H), 2.00–2.10 (m, 1H), 2.12–2.20 (m, 1H), 2.28–2.34 (m, 1H), 2.43 (s, 3H), 3.68–3.80 (m, 2H), 6.25 (d,  $J$  = 9.6 Hz, 1H), 7.27–7.33 (m, 3H), 7.34–7.39 (m, 1H), 7.44–7.48 (m, 2H), 7.62 (d,  $J$  = 8.2 Hz, 2H);  **$^{13}\text{C}$  NMR** ( $\text{CDCl}_3$ , 100 MHz)  $\delta$  21.5, 22.9, 43.8, 49.5, 74.6, 121.4, 125.2, 127.8, 128.1, 129.2, 130.8, 132.0, 132.8, 136.9, 143.3,

143.6, 144.5, 199.0; **HRMS** (FAB)  $m/z$  calcd for  $[\text{C}_{20}\text{H}_{18}^{79}\text{BrNO}_3\text{S}+\text{H}]^+ / [\text{C}_{20}\text{H}_{18}^{81}\text{BrNO}_3\text{S}+\text{H}]^+$  432.0269/434.0249, found 432.0251/434.0255.

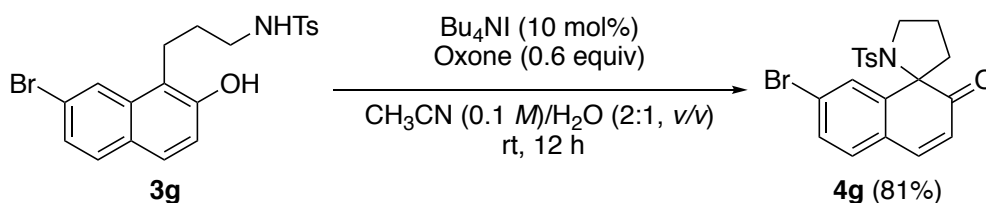

**7-Bromo-1'-tosyl-2H-spiro[naphthalene-1,2'-pyrrolidin]-2-one (4g):** 0.0349 g, 0.0807 mmol. This compound was purified by flash column chromatography on silica gel (E. Merck Art. 9385, eluent: hexane–EtOAc = 4:1). White solid; **TLC**,  $R_f$  = 0.53 (hexane–EtOAc = 1:1); **IR** (neat) 3025, 1678, 1585, 1338, 1155, 1095, 673  $\text{cm}^{-1}$ ;  **$^1\text{H}$  NMR** ( $\text{CDCl}_3$ , 400 MHz)  $\delta$  1.91–2.06 (m, 2H), 2.23–2.38 (m, 2H), 2.43 (s, 4H), 3.67–3.73 (m, 1H), 3.90–3.95 (m, 1H), 6.25 (d,  $J$  = 10.1 Hz, 1H), 7.20 (d,  $J$  = 8.2 Hz, 1H), 7.26–7.28 (m, 3H), 7.38–7.45 (m, 2H), 7.52 (d,  $J$  = 8.2 Hz, 2H);  **$^{13}\text{C}$  NMR** ( $\text{CDCl}_3$ , 100 MHz)  $\delta$  21.5, 22.8, 43.7, 49.6, 74.1, 124.3, 124.8, 127.2, 128.2, 129.4, 129.7, 130.8, 130.9, 137.3, 143.2, 143.9, 146.8, 198.9; **HRMS** (FAB)  $m/z$  calcd for  $[\text{C}_{20}\text{H}_{18}^{79}\text{BrNO}_3\text{S}+\text{H}]^+ / [\text{C}_{20}\text{H}_{18}^{81}\text{BrNO}_3\text{S}+\text{H}]^+$  432.0269/434.0249, found 432.0266/434.0235.

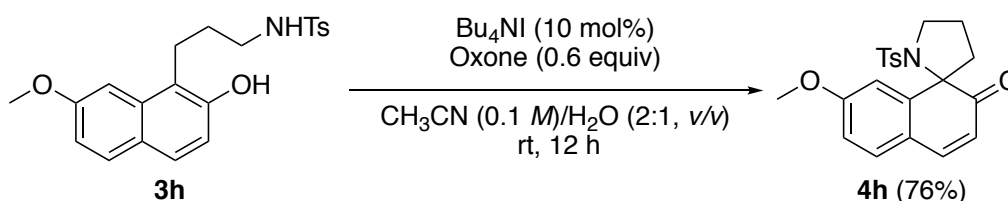

**7-Methoxy-1'-tosyl-2H-spiro[naphthalene-1,2'-pyrrolidin]-2-one (4h):** 10.0291 g, 0.0758 mmol. This compound was purified by flash column chromatography on silica gel (E. Merck Art. 9385, eluent: hexane–EtOAc = 4:1). White solid; **TLC**,  $R_f$  = 0.48 (hexane–EtOAc = 1:1); **IR** (neat) 2953, 1671, 1602, 1336, 1286, 1232, 1154, 1094, 673,  $\text{cm}^{-1}$ ;  **$^1\text{H}$  NMR** ( $\text{CDCl}_3$ , 400 MHz)  $\delta$  1.93–2.02 (m, 1H), 2.03–2.13 (m, 1H), 2.14–2.23 (m, 1H), 2.29–2.36 (m, 1H), 2.41 (s, 3H), 3.73–3.77 (m, 2H), 3.73 (s, 3H), 6.09 (d,  $J$  = 9.8 Hz, 1H), 6.79–6.82 (m, 1H), 6.87 (d,  $J$  = 2.3 Hz, 1H), 7.25–7.27 (m, 3H), 7.40 (d,  $J$  = 9.8 Hz, 1H), 7.62 (d,  $J$  = 7.8 Hz, 2H);  **$^{13}\text{C}$  NMR** ( $\text{CDCl}_3$ , 100 MHz)  $\delta$  21.5, 22.8, 44.1, 49.6, 55.2, 75.0, 112.5, 112.9, 121.3, 122.3, 127.7, 129.0, 131.3, 137.3, 143.0, 145.2, 147.8, 161.3, 199.8; **HRMS** (FAB)  $m/z$  calcd for  $[\text{C}_{21}\text{H}_{21}\text{NO}_4\text{S}+\text{H}]^+$  384.1270, found 384.1269.

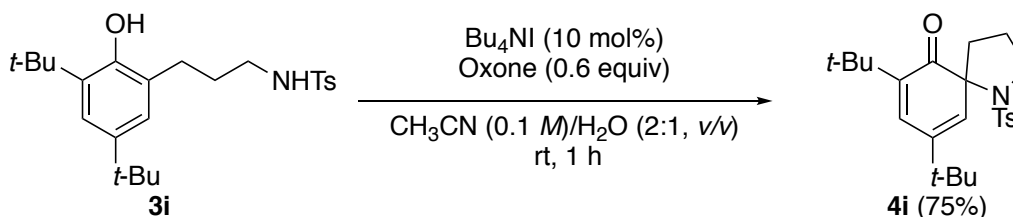

**7,9-Di-tert-butyl-1'-tosyl-1-azaspiro[4.5]deca-7,9-dien-6-one (4i):** 0.0311 g, 0.0749 mmol. This compound was purified by flash column chromatography on silica gel (E. Merck Art. 9385, eluent:

hexane–EtOAc = 10:1). Brown solid; **TLC**,  $R_f$  = 0.76 (hexane–EtOAc = 1:1); **IR** (neat) 2959, 1672, 1652, 1343, 1157, 1104, 665  $\text{cm}^{-1}$ ;  **$^1\text{H}$  NMR** ( $\text{CDCl}_3$ , 400 MHz)  $\delta$  1.15 (s, 9H), 1.21 (s, 9H), 1.82–1.92 (m, 2H), 2.00–2.10 (m, 2H), 2.40 (s, 3H), 3.62–3.68 (m, 2H), 6.04 (d,  $J$  = 2.5 Hz, 1H), 6.91 (d,  $J$  = 2.5 Hz, 1H), 7.25 (d,  $J$  = 8.0 Hz, 2H), 7.66 (d,  $J$  = 8.0 Hz, 2H);  **$^{13}\text{C}$  NMR** ( $\text{CD}_2\text{Cl}_2$ , 100 MHz)  $\delta$  21.6, 22.7, 28.8, 29.3, 34.5, 34.7, 39.4, 49.8, 73.3, 127.7, 129.6, 133.0, 135.8, 138.6, 140.5, 143.3, 143.4, 200.4; **HRMS** (FAB)  $m/z$  calcd for  $[\text{C}_{24}\text{H}_{33}\text{NO}_3\text{S}+\text{H}]^+$  415.2181, found 415.2174.

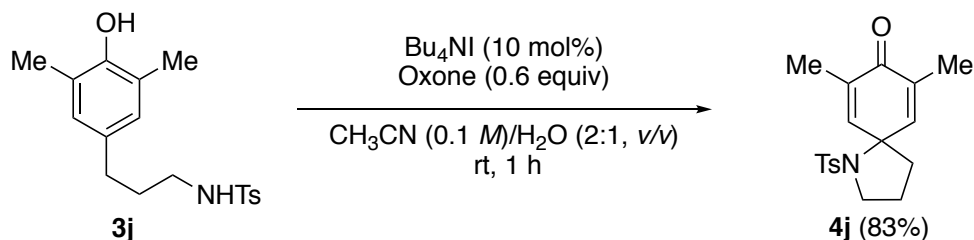

**7,9-Dimethyl-1-tosyl-1-azaspiro[4.5]deca-6,9-dien-8-one (4j):** 0.0276 g, 0.0832 mmol. This compound was purified by flash column chromatography on silica gel (E. Merck Art. 9385, eluent: hexane–EtOAc = 10:1). White solid; **TLC**,  $R_f$  = 0.57 (hexane–EtOAc = 1:1); **IR** (neat) 2919, 1643, 1336, 1155, 1006, 664  $\text{cm}^{-1}$ ;  **$^1\text{H}$  NMR** ( $\text{CDCl}_3$ , 400 MHz)  $\delta$  1.82 (s, 6H), 1.98–2.05 (m, 4H), 2.43 (s, 3H), 3.67–3.70 (m, 2H), 6.38 (s, 2H), 7.27 (d,  $J$  = 8.2 Hz, 2H), 7.59 (d,  $J$  = 8.2 Hz, 2H);  **$^{13}\text{C}$  NMR** ( $\text{CDCl}_3$ , 100 MHz)  $\delta$  15.9, 21.5, 23.2, 40.0, 49.0, 63.4, 127.7, 129.3, 133.9, 136.4, 143.5, 144.8, 186.4; **HRMS** (FAB)  $m/z$  calcd for  $[\text{C}_{18}\text{H}_{21}\text{NO}_3\text{S}+\text{H}]^+$  332.1320, found 332.1325.

## Procedures for Control Experiments

### Control Experiments to Probe Active Species

**Using  $\text{I}_2$  and  $\text{Bu}_4\text{NOH}$  (Scheme 3b, Entries 1 and 8):** To a solution of **1a** (0.0139 g, 0.0500 mmol) and 40% aqueous tetrabutylammonium hydroxide (0.0650 mL, 0.100 mmol) in  $\text{CH}_3\text{CN}$  (0.500 mL) and  $\text{H}_2\text{O}$  (0.250 mL) were added iodine (0.0129 g, 0.0500 mmol) at room temperature. After stirring for 1 h, small amount of reaction mixture was sampled *via* syringe and poured into saturated aqueous  $\text{Na}_2\text{S}_2\text{O}_3$  to quench the reaction. The volatiles were removed under reduced pressure, and the residue was dissolved into  $\text{CDCl}_3$  to measure the conversion yield, which was determined by  $^1\text{H}$  NMR analysis. Similar control experiment was also performed using **3a** instead of **1a** and similar results were obtained.

**Using  $\text{I}_2$  and  $\text{K}_2\text{CO}_3$  (Scheme 3b, Entries 2 and 9):** To a solution of **1a** (0.0139 g, 0.0500 mmol) and  $\text{K}_2\text{CO}_3$  (0.0138 g, 0.100 mmol) in toluene (0.500 mL) and  $\text{H}_2\text{O}$  (0.250 mL) were added iodine (0.0129 g, 0.0500 mmol) at room temperature. After stirring for 1 h, small amount of reaction mixture was sampled *via* syringe and poured into saturated aqueous  $\text{Na}_2\text{S}_2\text{O}_3$  to quench the reaction. The volatiles were removed under reduced pressure, and the residue was dissolved into  $\text{CDCl}_3$  to measure the conversion yield, which was determined by  $^1\text{H}$  NMR analysis. Similar control experiment was also performed using **3a** instead of **1a** and similar results were obtained.

**Using Bu<sub>4</sub>NI<sub>3</sub> (Scheme 3b, Entries 3 and 10):** To a solution of **1a** (0.0139 g, 0.0500 mmol) in CH<sub>3</sub>CN (0.500 mL) and H<sub>2</sub>O (0.250 mL) was added Bu<sub>4</sub>NI<sub>3</sub> (0.0311 g, 0.0500 mmol) at room temperature. After stirring for 24 h, small amount of reaction mixture was sampled *via* syringe and poured into saturated aqueous Na<sub>2</sub>S<sub>2</sub>O<sub>3</sub> to quench the reaction. The volatiles were removed under reduced pressure, and the residue was dissolved into CDCl<sub>3</sub> to measure the conversion yield, which was determined by <sup>1</sup>H NMR analysis. Similar control experiments were also performed using **3a** instead of **1a**.

**Using I<sub>2</sub> (Scheme 3b, Entries 4, 5, 7 and 11):** To a solution of **1a** (0.0139 g, 0.0500 mmol) in CH<sub>3</sub>CN (0.500 mL) and H<sub>2</sub>O (0.250 mL) was added iodine (0.0129 g, 0.0500 mmol) at room temperature. After stirring for 1 h, small amount of reaction mixture was sampled *via* syringe and poured into saturated aqueous Na<sub>2</sub>S<sub>2</sub>O<sub>3</sub> to quench the reaction. The volatiles were removed under reduced pressure, and the residue was dissolved into CDCl<sub>3</sub> to measure the conversion yield, which was determined by <sup>1</sup>H NMR analysis. Similar control experiments were also performed using **3a** instead of **1a**.

**Using I<sub>2</sub> and AcOH (Scheme 3b, Entry 6):** To a solution of **1a** (0.0139 g, 0.0500 mmol) and AcOH (3.00 μL, 0.0500 mmol) in toluene (0.500 mL) and H<sub>2</sub>O (0.250 mL) was added iodine (0.0129 g, 0.0500 mmol) at room temperature. After stirring for 1 h, small amount of reaction mixture was sampled *via* syringe and poured into saturated aqueous Na<sub>2</sub>S<sub>2</sub>O<sub>3</sub> to quench the reaction. The volatiles were removed under reduced pressure, and the residue was dissolved into CDCl<sub>3</sub> to measure the conversion yield, which was determined by <sup>1</sup>H NMR analysis.

#### Control Experiments to Probe the Influence of Tethers (Scheme 3c)

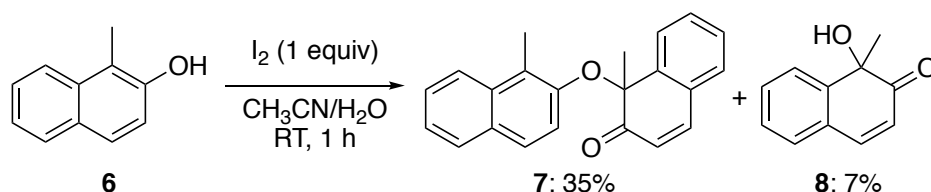

To a solution of **6** (0.00791 g, 0.0500 mmol) in CH<sub>3</sub>CN (0.500 mL) and H<sub>2</sub>O (0.0250 mL) was added iodine (0.0129 g, 0.0500 mmol) at room temperature. After stirring for 1 h, small amount of reaction mixture was sampled *via* syringe and poured into saturated aqueous Na<sub>2</sub>S<sub>2</sub>O<sub>3</sub> to quench the reaction. The volatiles were removed under reduced pressure, and the residue was dissolved into CDCl<sub>3</sub> to measure the conversion yield, which was determined by <sup>1</sup>H NMR analysis. **7**<sup>5,11</sup> and **8**<sup>12</sup> were known compounds.

## References

1. Uyanik, M.; Sasakura, N.; Kuwahata, M.; Ejima, Y.; Ishihara, K. *Chem. Lett.* **2015**, *44*, 381–383.
2. Jain, N.; Xu, S.; Ciufolini, M. A. *Chem. Eur. J.* **2017**, *23*, 4542–4546.
3. Sarkar, D.; Ghosh, M. K.; Rout, N. *Org. Biomol. Chem.*, **2016**, *14*, 7883–7898.
4. Oleynik, A. S.; Kuprina, T. S.; Pevneva, N. Y.; Markov, A. F.; Kandalintseva, N. V.; Prosenko, I. A. E.; Grigor'ev, A. *Russ. Chem. Bull.* **2007**, *56* 1135–1143.
5. Uyanik, M.; Nishioka, K.; Ishihara, K. *Heterocycles* **2017**, *95*, 1132–1147.
6. Uyanik, M.; Yasui, T.; Ishihara, K. *J. Org. Chem.* **2017**, *82*, 11946–11953.
7. Kohsuke, A.; Kenichi, M.; Junki, N.; Ryota, H.; Koichi, M. *Org. Lett.* **2016**, *18*, 3354–3357.
8. Basarić, N.; Došlić, N.; Ivković, J.; Wang, Y.-H.; Veljković, J.; Mlinarić-Majerski, K.; Wan, P. *J. Org. Chem.* **2013** *78*, 1811–1823.
9. Panetta, J. A.; Rapoport, H. *J. Org. Chem.* **1982**, *47*, 946–950.
10. Jain, N.; Ciufolini, M. A. *Synlett* **2015**, *26*, 631–634.
11. Yi, J.-C.; Wu, Z.-J.; You, S.-L. *Chin. J. Chem.* **2019**, *37*, 903–908.
12. Uyanik, M.; Mutsuga, T.; Ishihara, K. *Angew. Chem. Int. Ed.* **2017**, *56*, 3956–3960.

**1a**,  $^1\text{H}$  NMR ( $\text{CDCl}_3$ , 400 MHz)

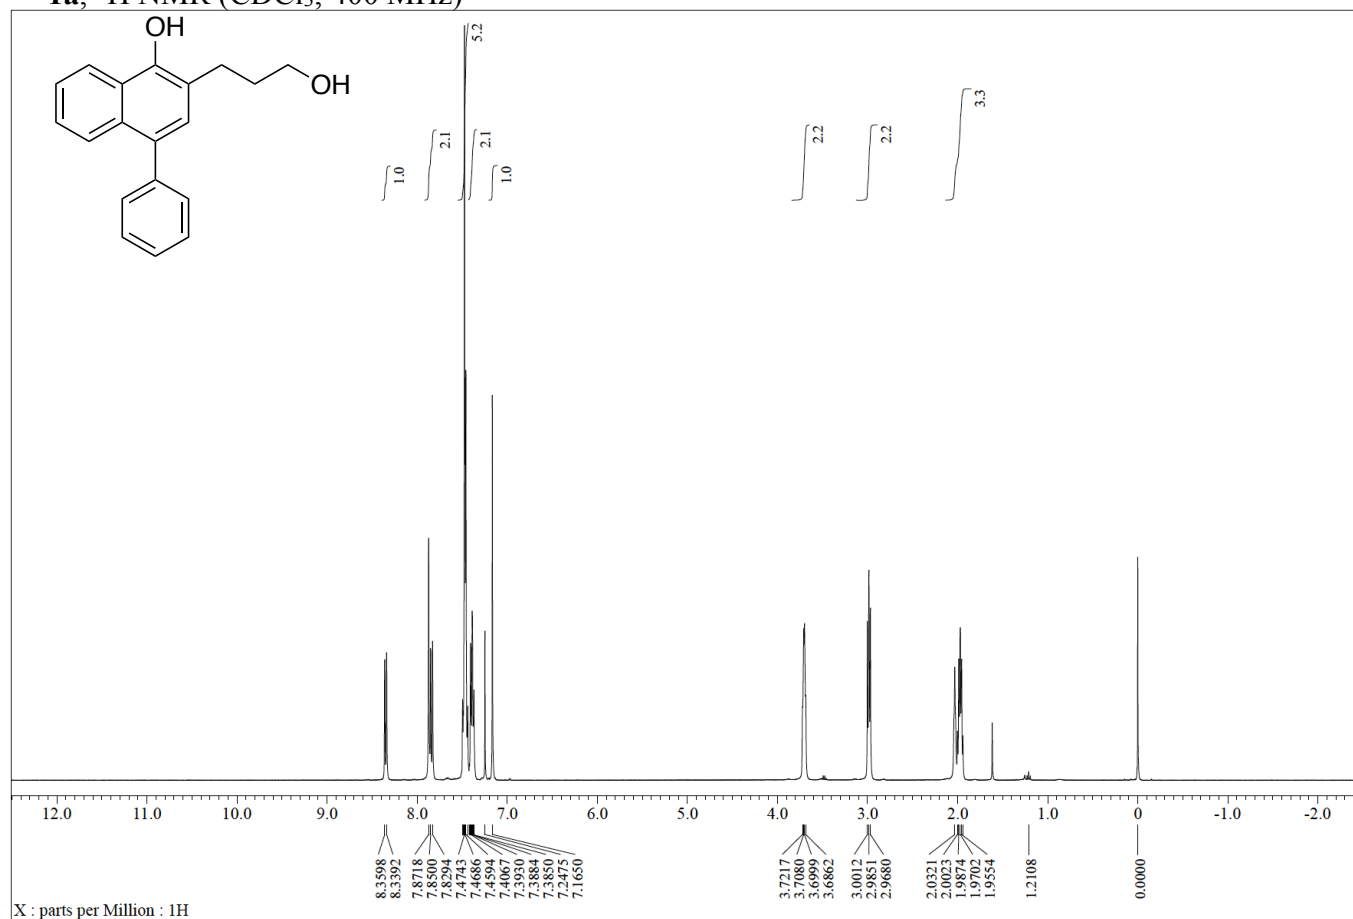

**1a**,  $^{13}\text{C}$  NMR ( $\text{CDCl}_3$ , 100 MHz)

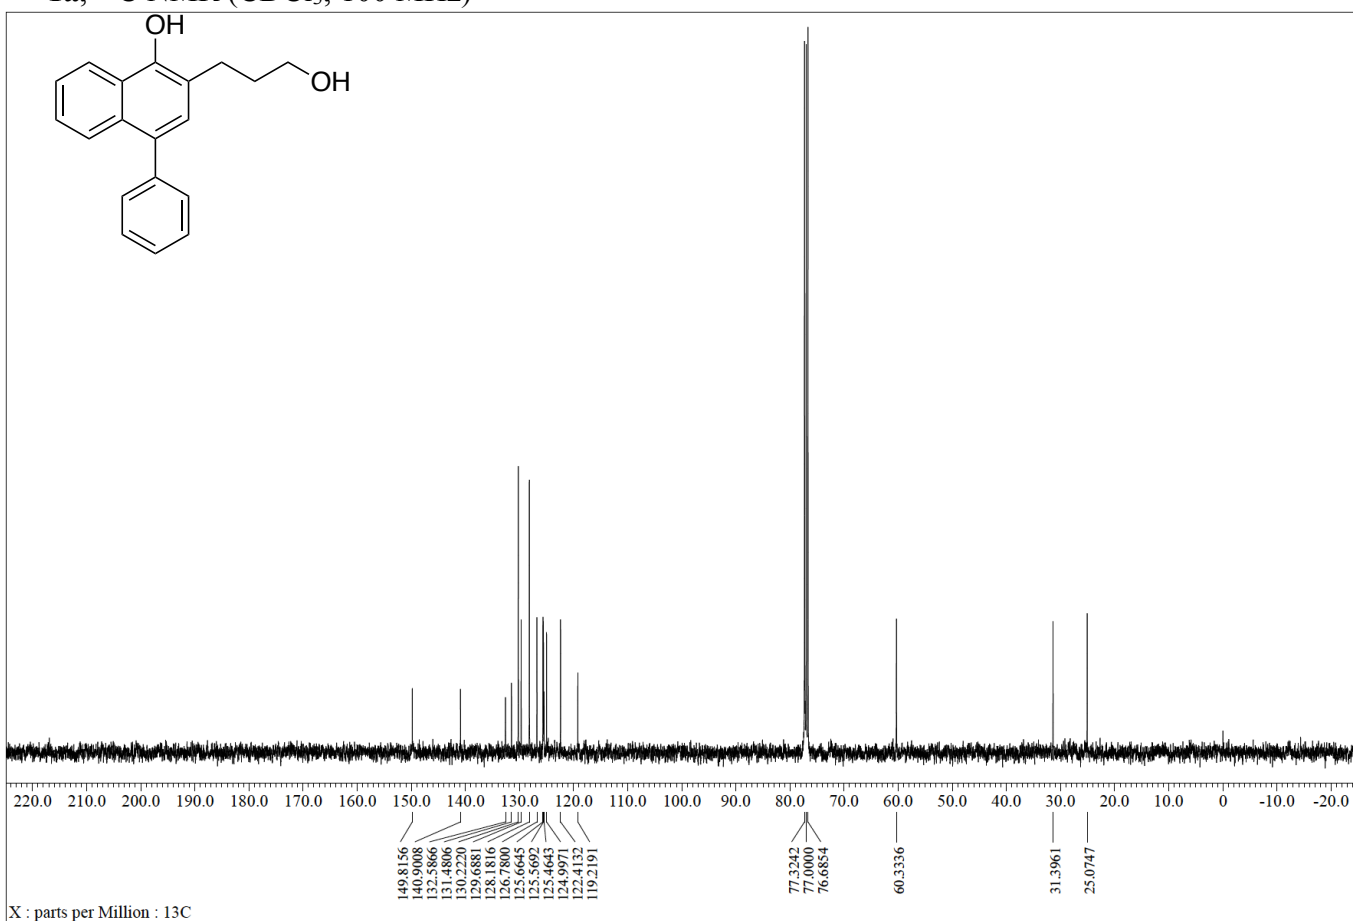



**1b**,  $^1\text{H}$  NMR ( $\text{CDCl}_3$ , 400 MHz)

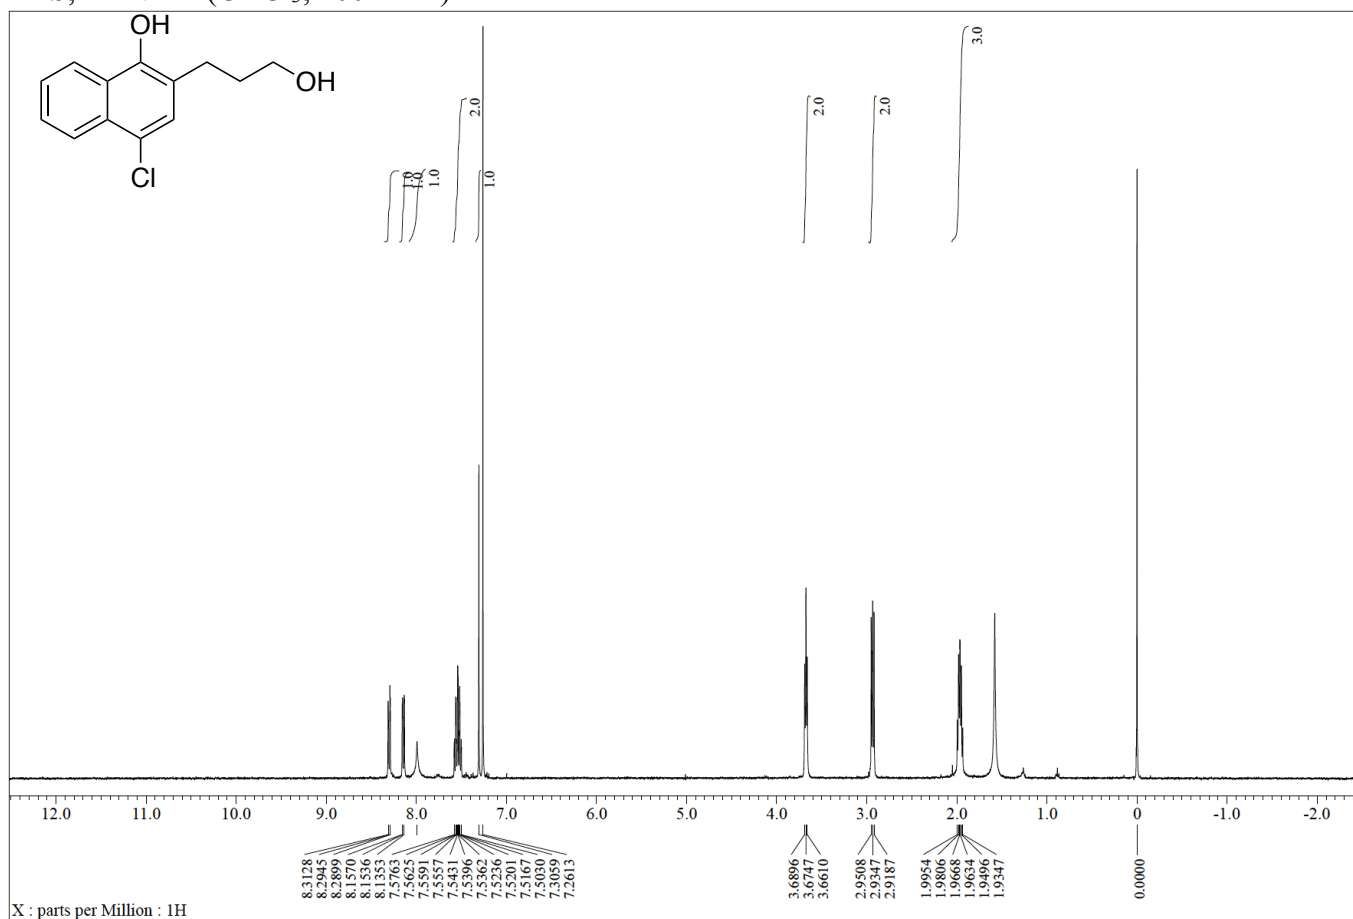

**1b**,  $^{13}\text{C}$  NMR ( $\text{CDCl}_3$ , 100 MHz)

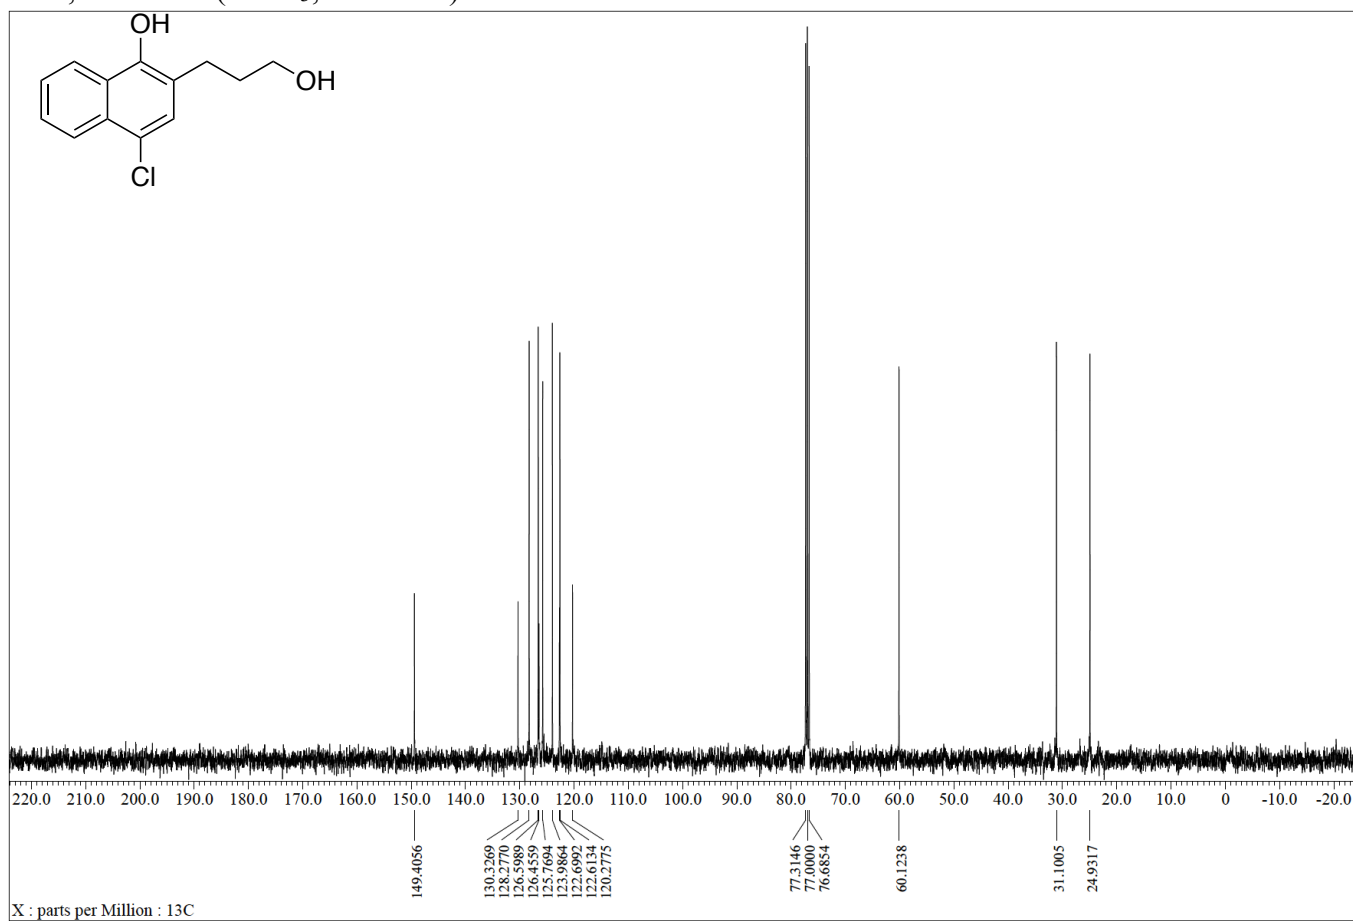

**1c**,  $^1\text{H}$  NMR ( $\text{CDCl}_3$ , 400 MHz)

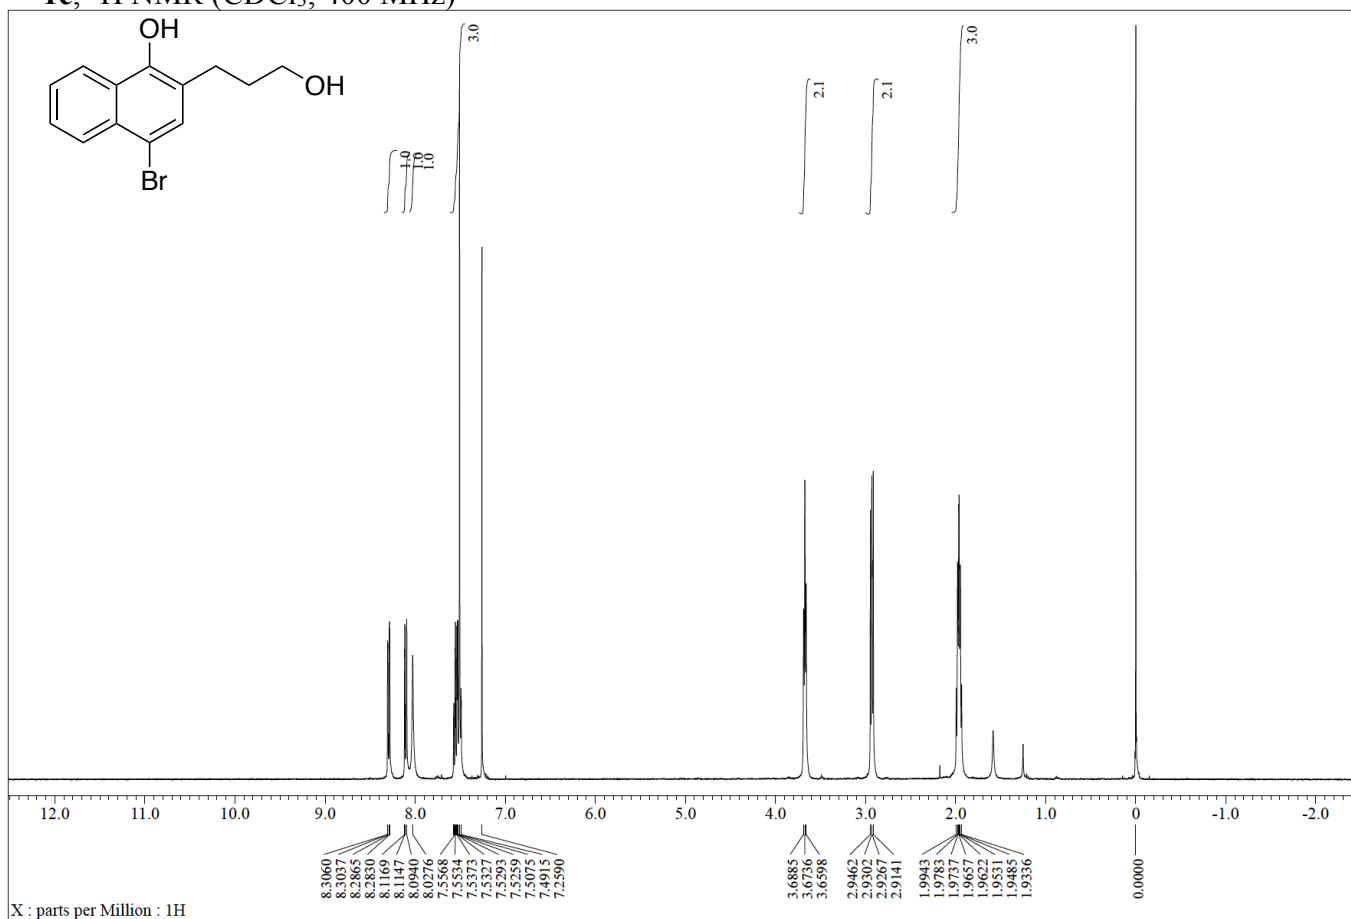

**1c**,  $^{13}\text{C}$  NMR ( $\text{CDCl}_3$ , 100 MHz)

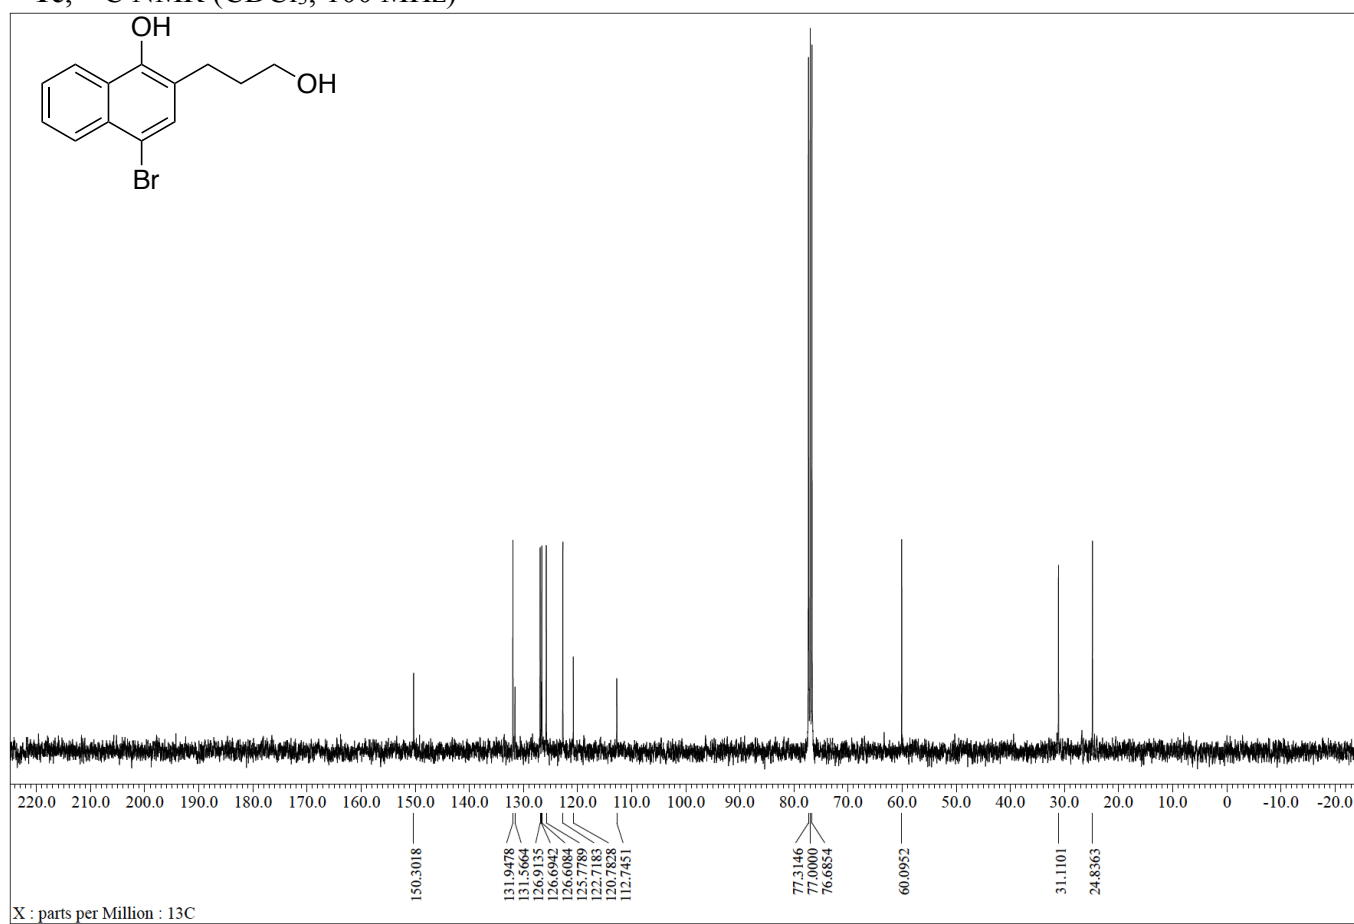

**1d**,  $^1\text{H}$  NMR ( $\text{CDCl}_3$ , 400 MHz)

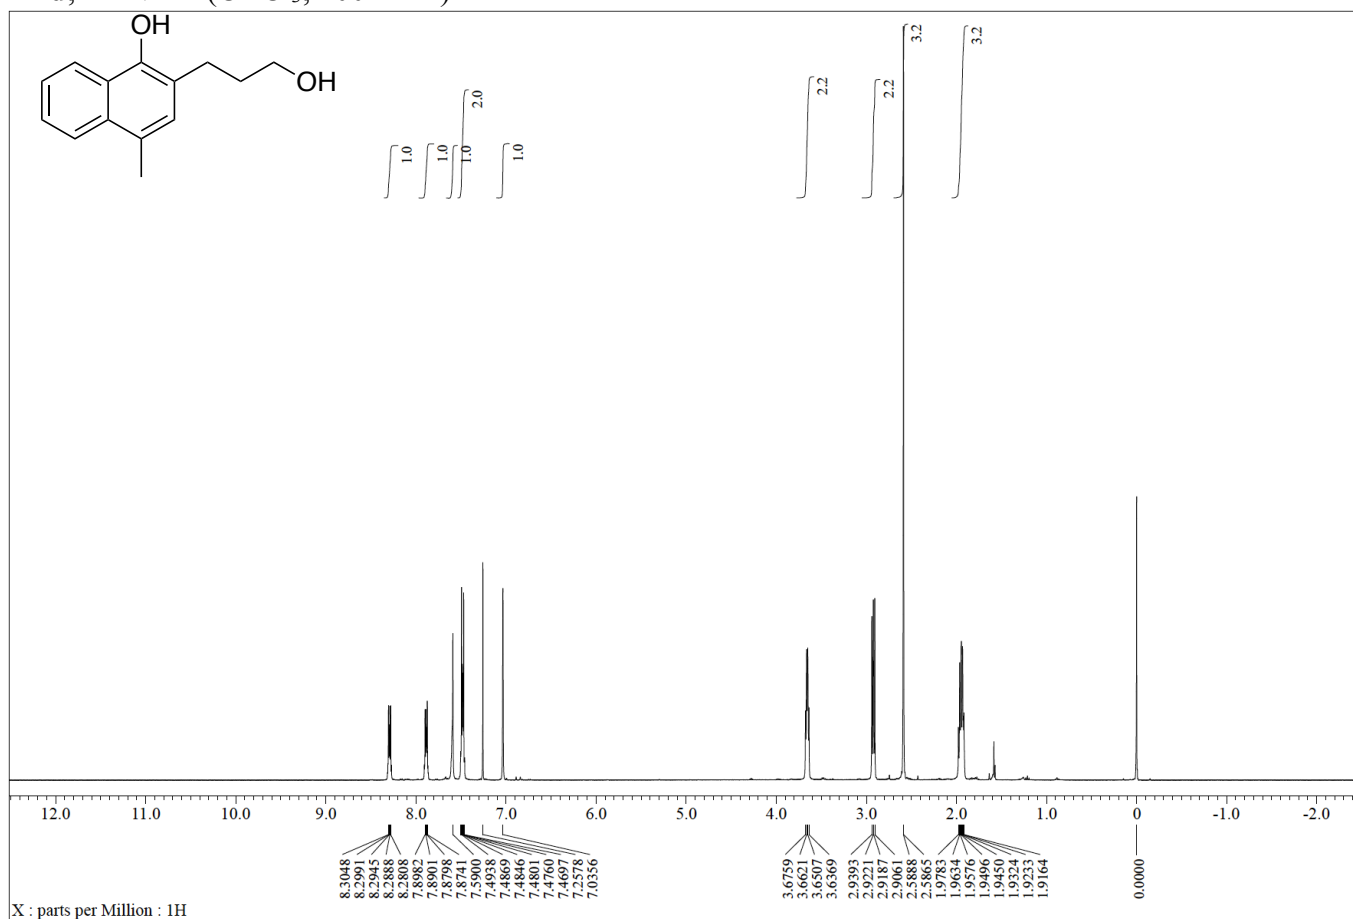

**1d**,  $^{13}\text{C}$  NMR ( $\text{CDCl}_3$ , 100 MHz)

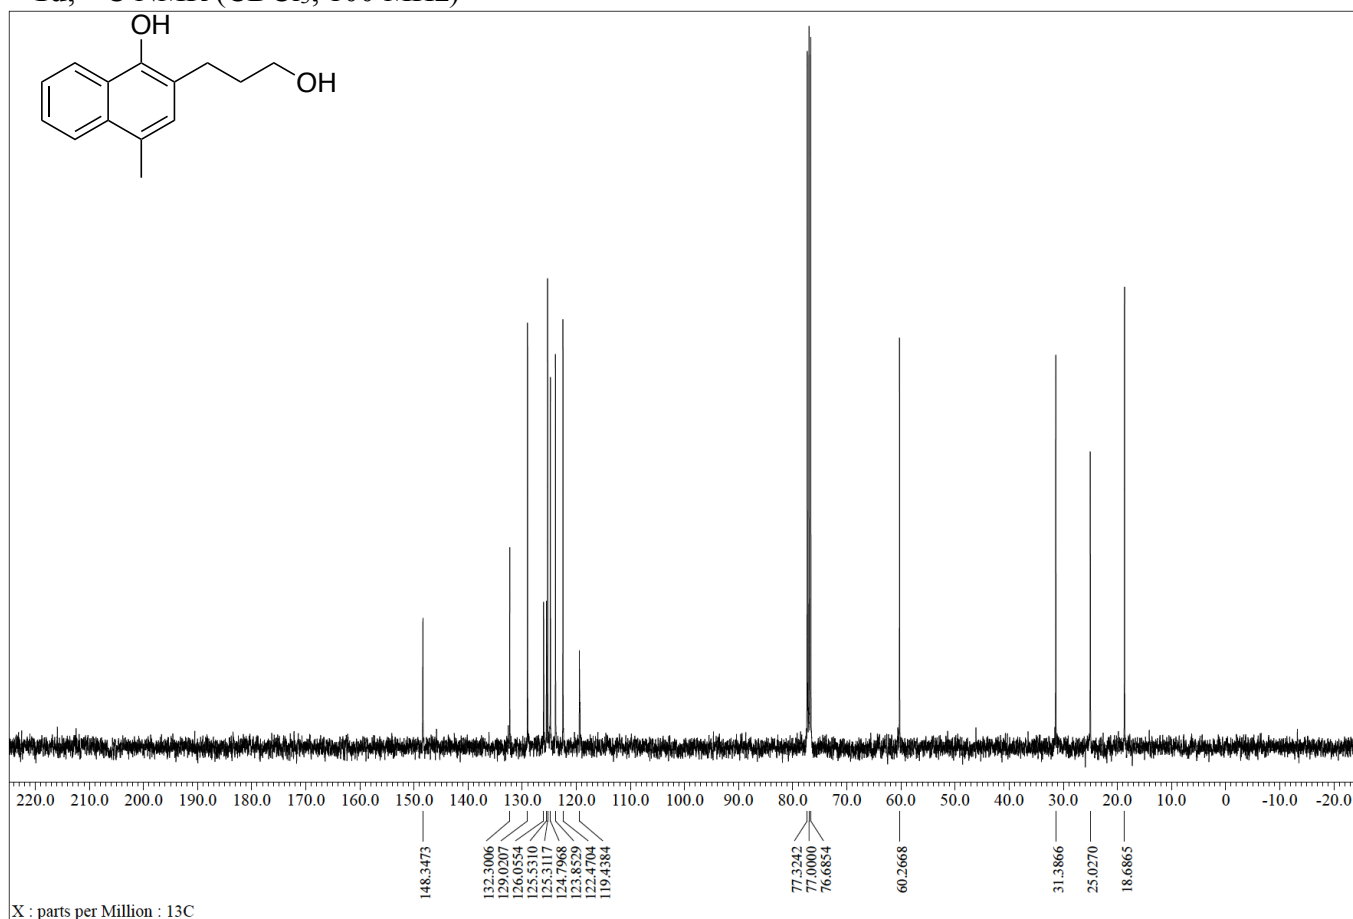

OCCc1ccc(O)cc1

Chemical structure of 2-(3-hydroxypropyl)naphthalen-1-ol is shown above the spectrum.

Integration values (from left to right): 1.0, 1.0, 1.9, 0.9, 2.2, 2.3, 1.0, 2.3.

Chemical shifts (ppm) listed below the spectrum (from left to right): 7.9062, 7.8844, 7.7905, 7.7699, 7.6679, 7.6450, 7.4812, 7.4606, 7.4571, 7.3495, 7.3472, 7.3300, 7.3266, 7.2532, 7.1731, 7.1513, 3.6862, 3.6702, 3.6392, 3.6255, 3.6117, 3.4915, 3.4433, 3.2601, 3.2429, 3.2268, 2.0584, 2.0458, 2.0413, 2.0287, 2.0126, 0.0000.

X : parts per Million : 1H

OCCc1ccc(O)cc2ccccc12

152.3136  
133.2159  
129.4593  
128.6488  
128.0863  
126.2842  
122.9376  
122.6230  
118.7043  
117.7985  
77.3146  
77.0000  
76.6758  
60.5147  
30.1852  
19.9832

X : parts per Million :  $^{13}\text{C}$

**1f**,  $^1\text{H}$  NMR ( $\text{CDCl}_3$ , 400 MHz)

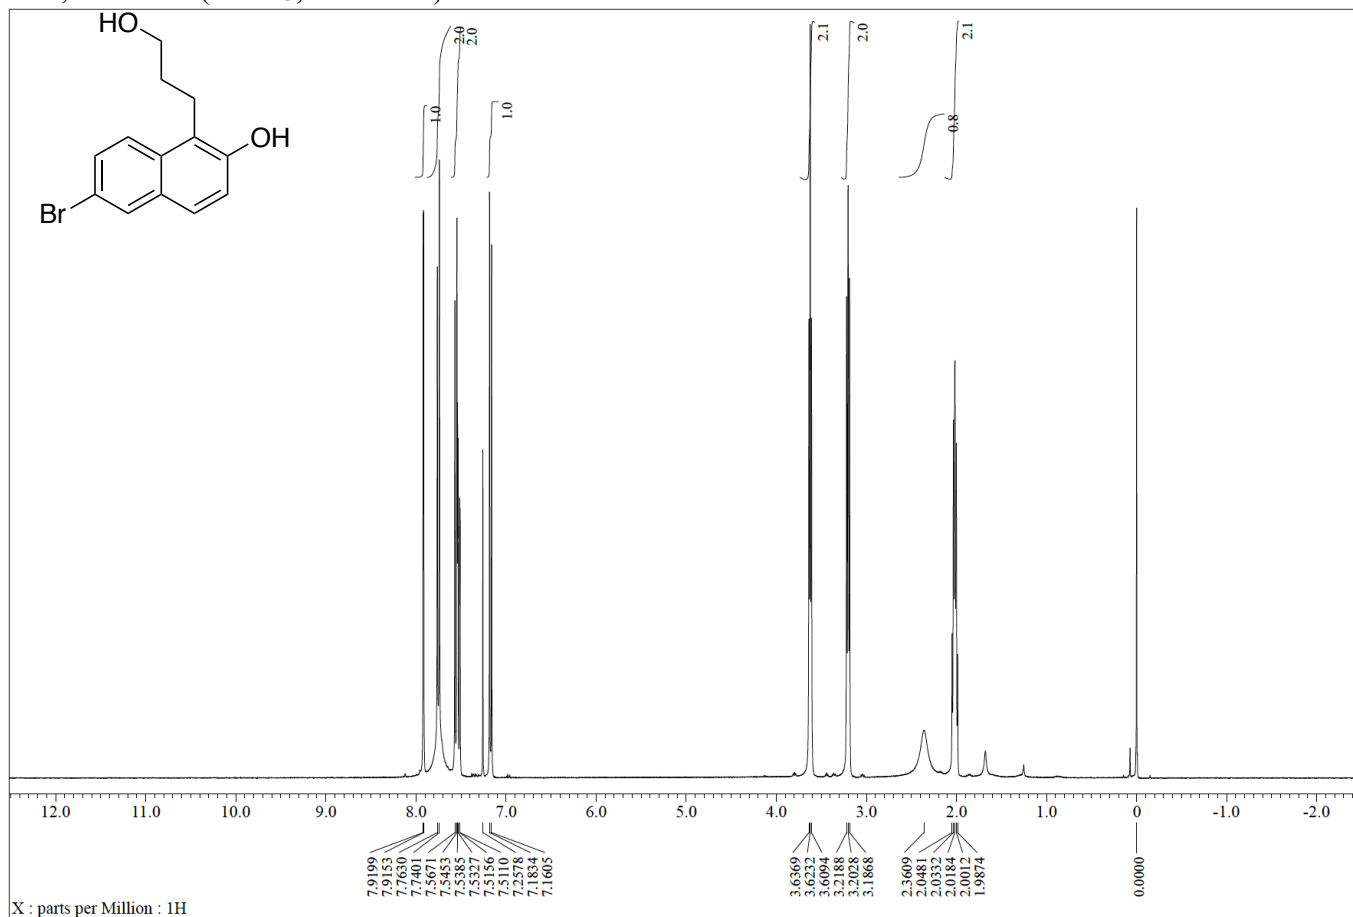

**1f**,  $^{13}\text{C}$  NMR ( $\text{CDCl}_3$ , 100 MHz)

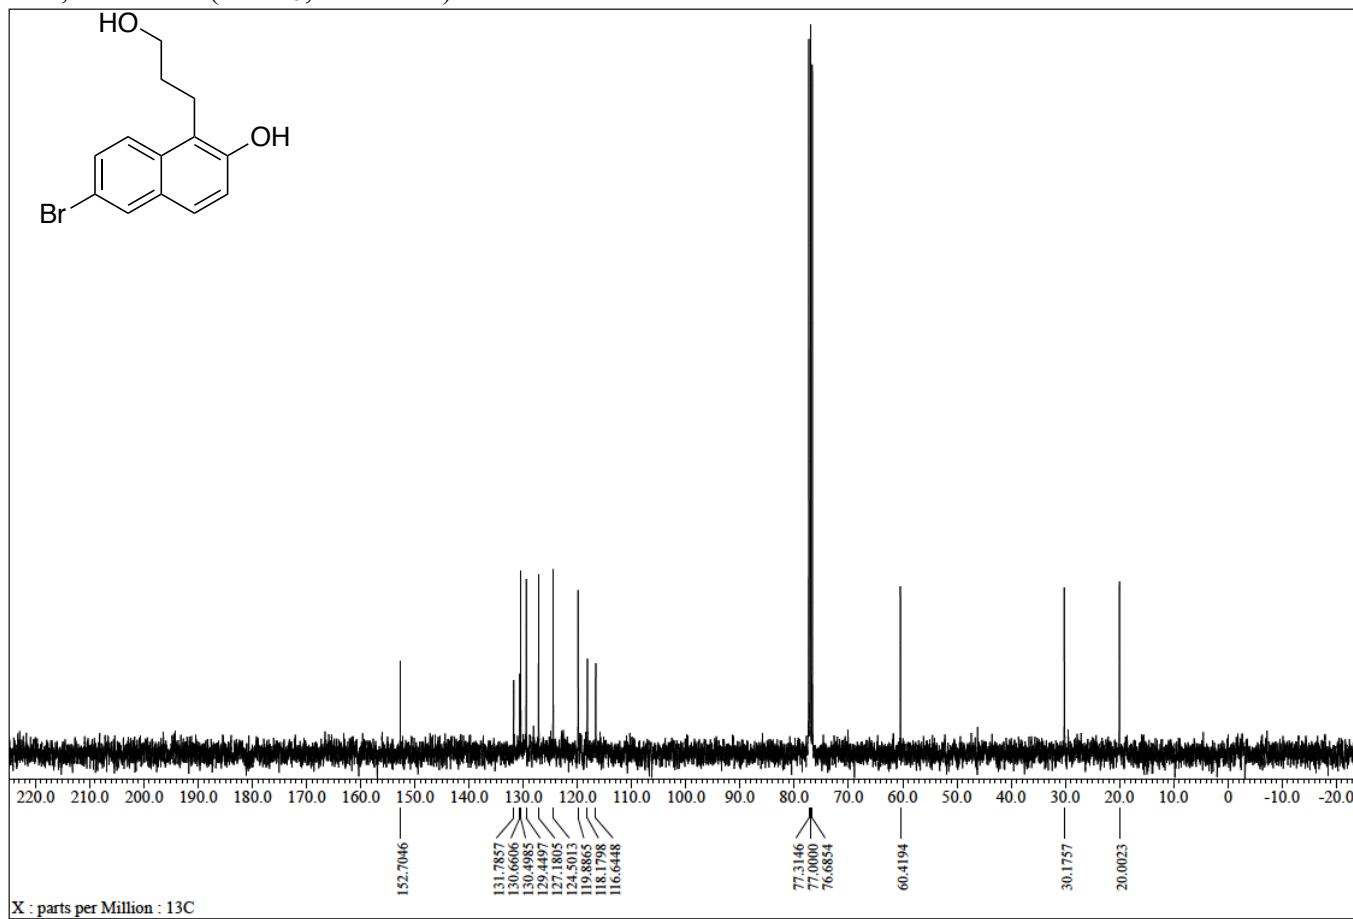

**1g**,  $^1\text{H}$  NMR ( $\text{CDCl}_3$ , 400 MHz)

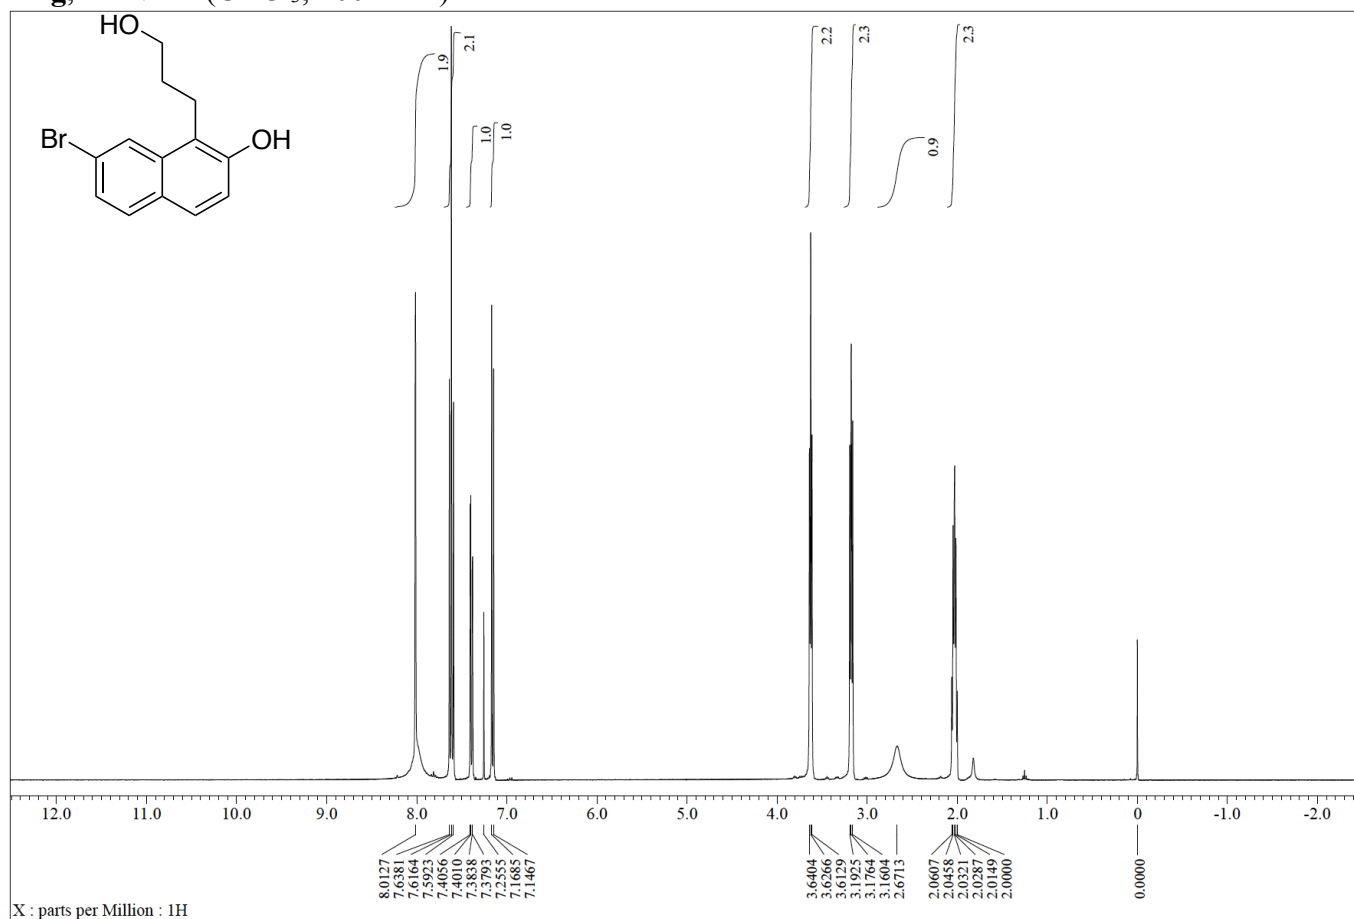

**1g**,  $^{13}\text{C}$  NMR ( $\text{CDCl}_3$ , 100 MHz)

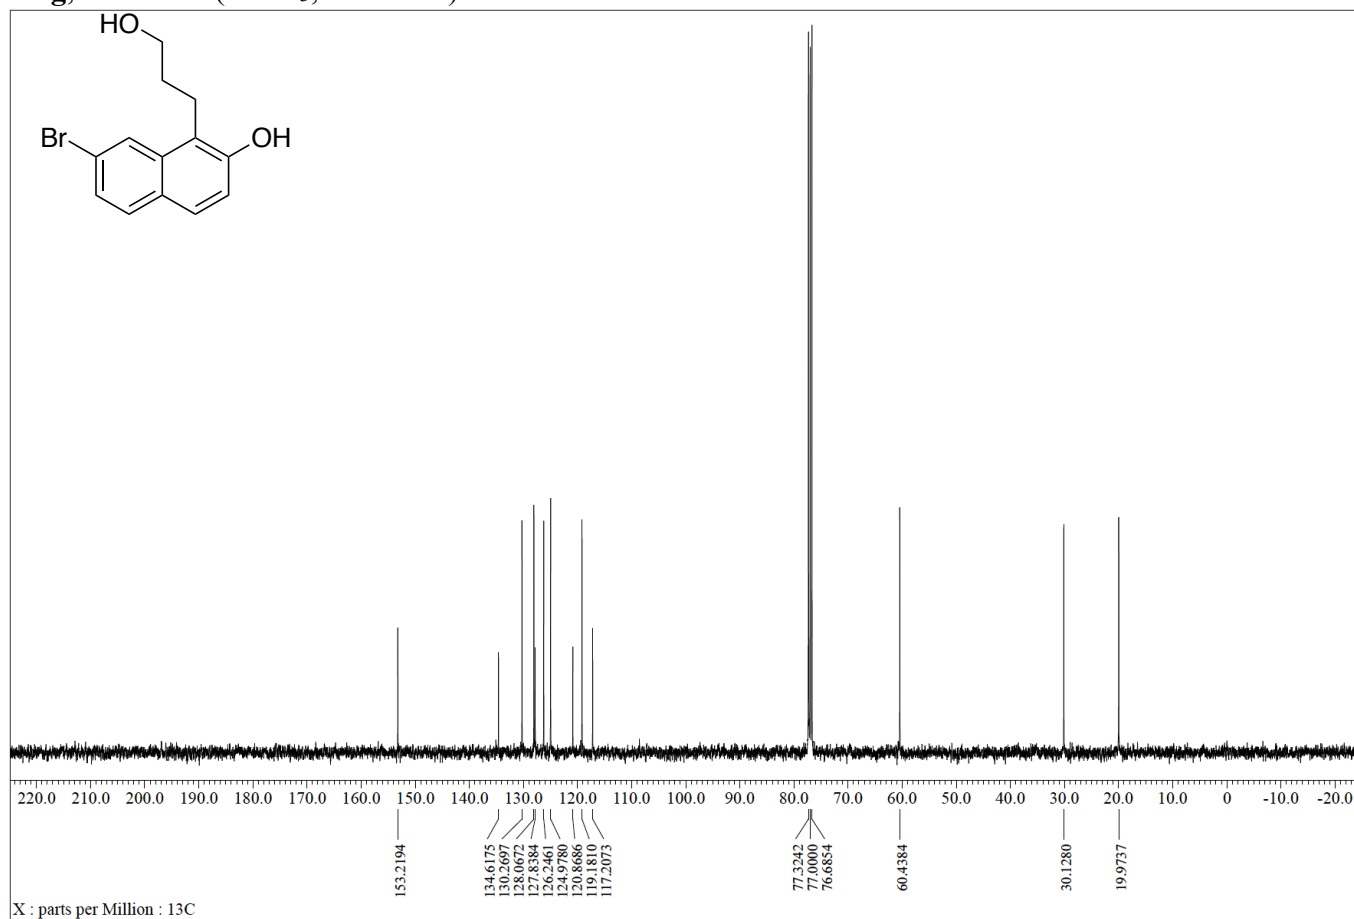

**1h**,  $^1\text{H}$  NMR ( $\text{CDCl}_3$ , 400 MHz)

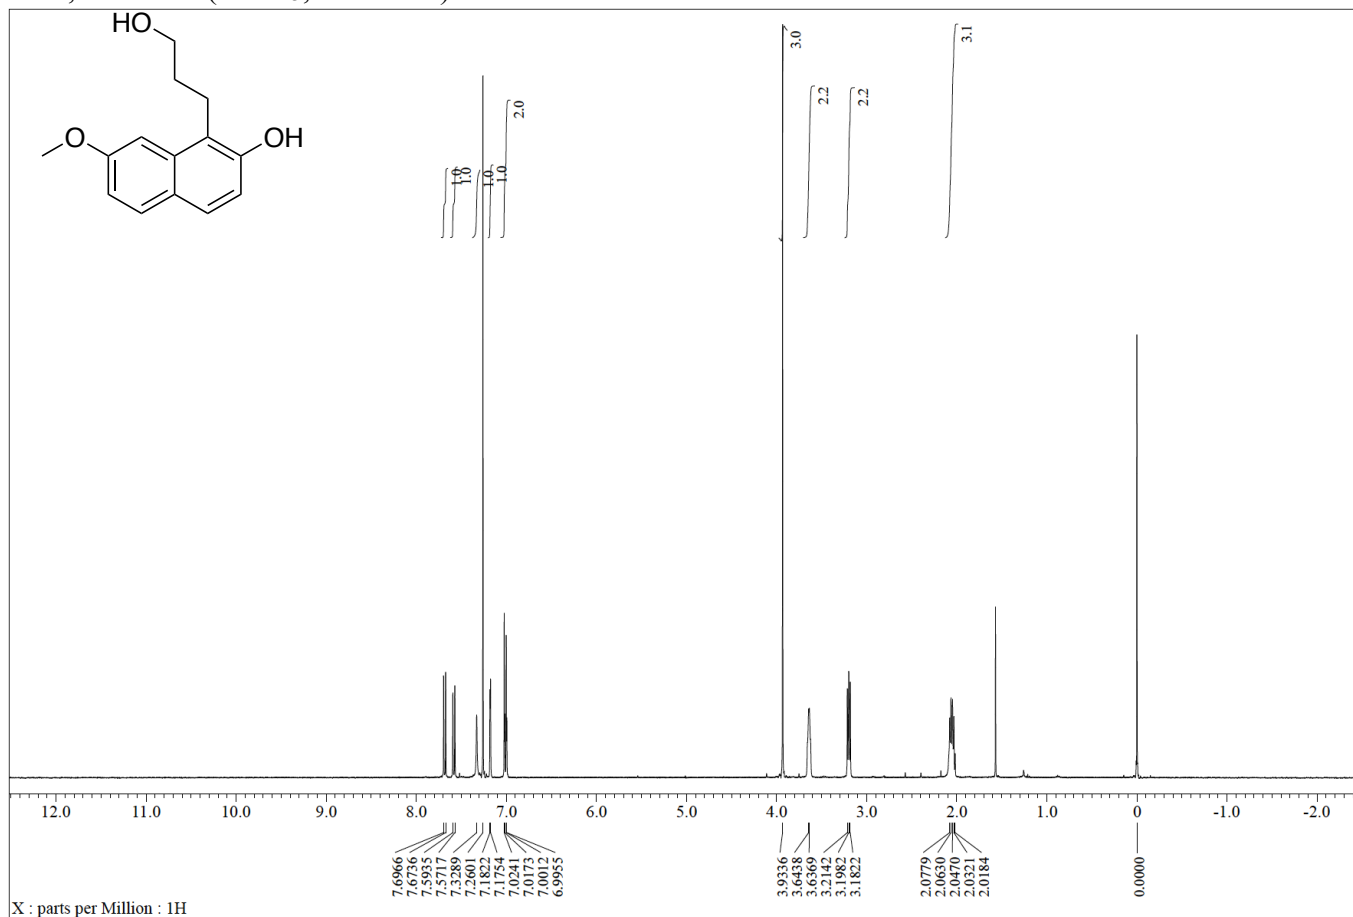

**1h**,  $^{13}\text{C}$  NMR ( $\text{CDCl}_3$ , 100 MHz)

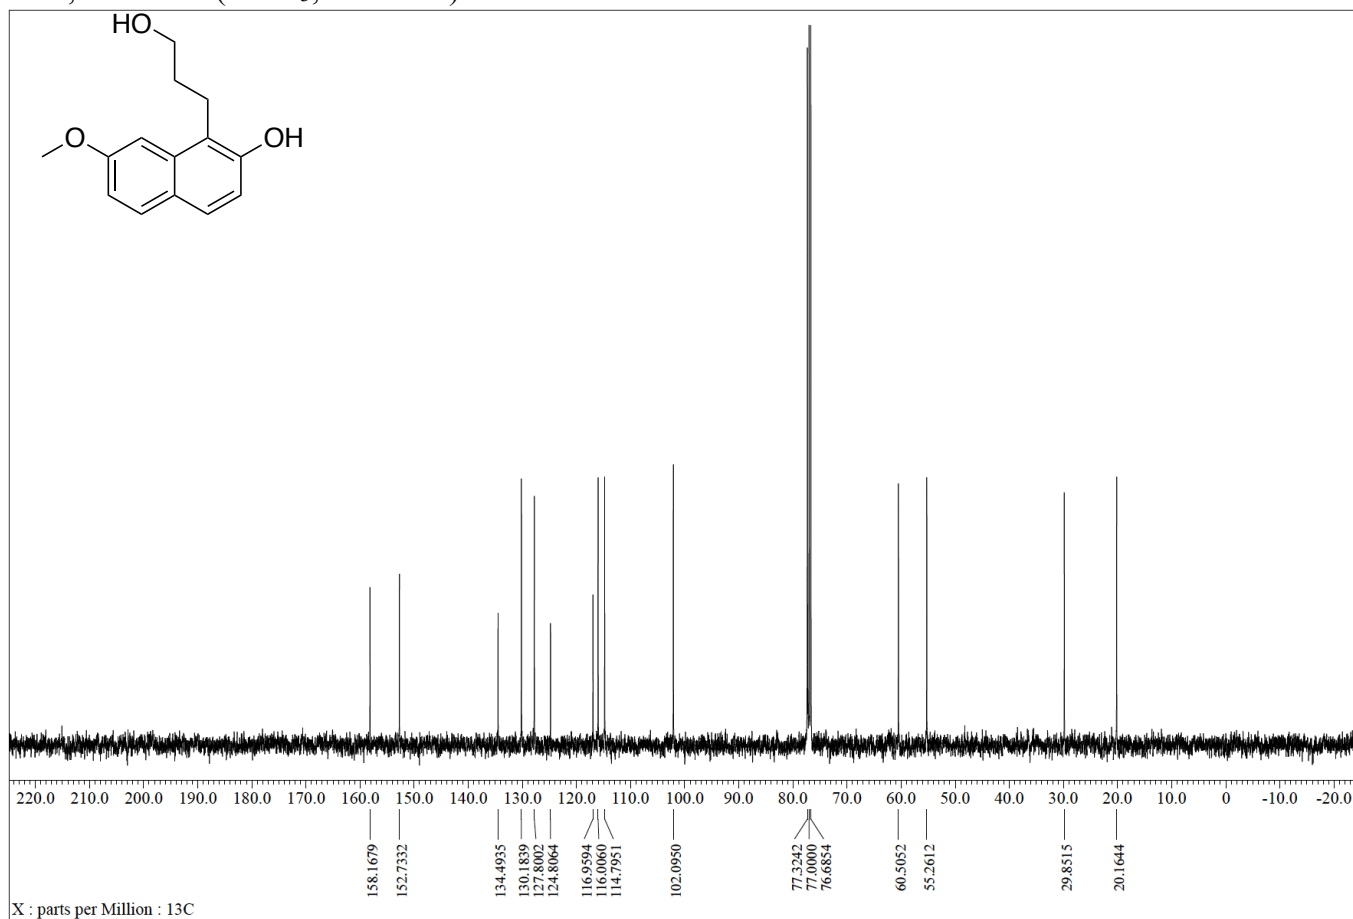

**1i**,  $^1\text{H}$  NMR ( $\text{CDCl}_3$ , 400 MHz)

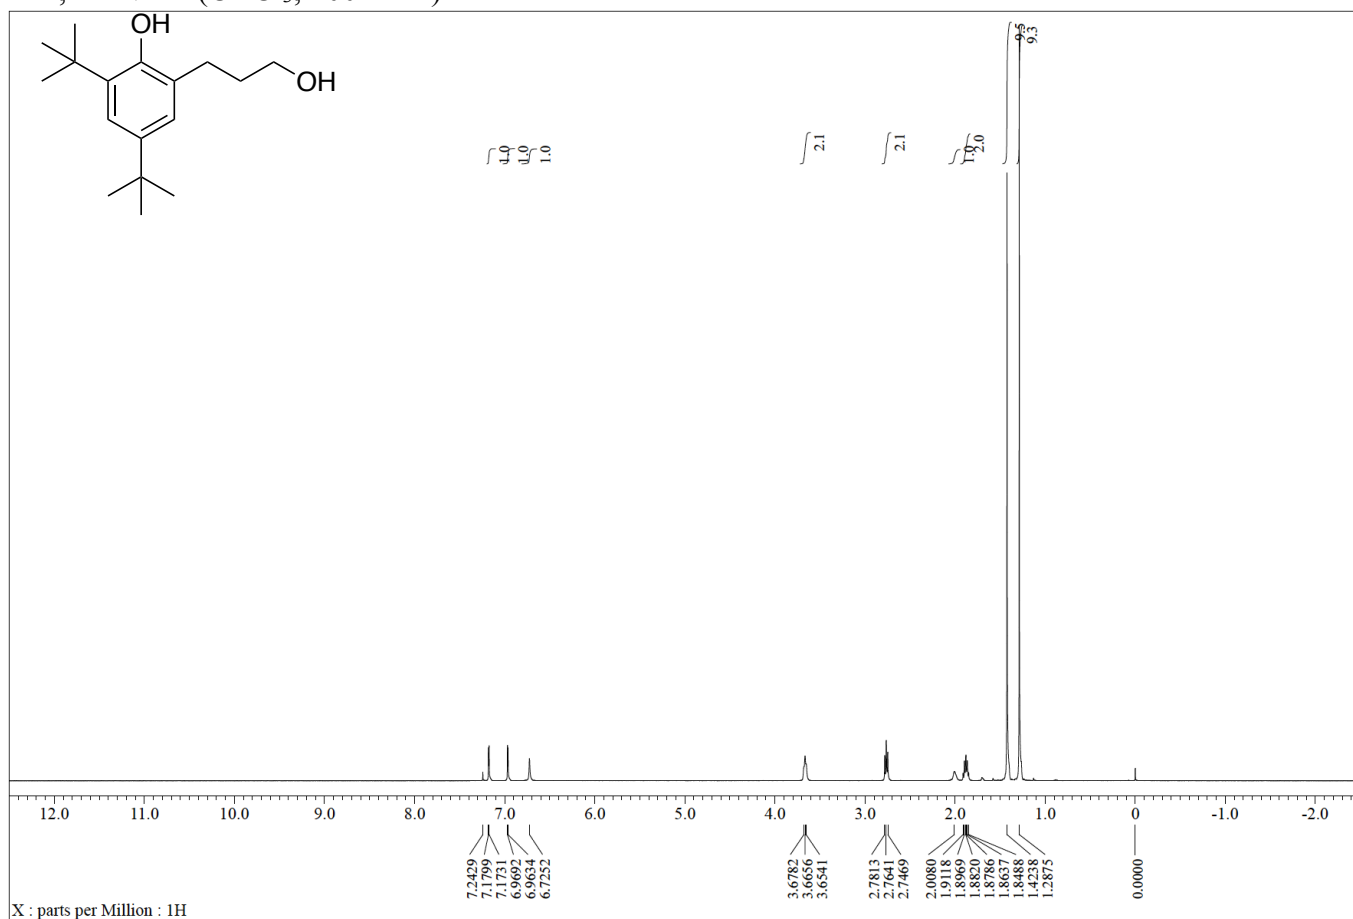

**1i**,  $^{13}\text{C}$  NMR ( $\text{CDCl}_3$ , 100 MHz)

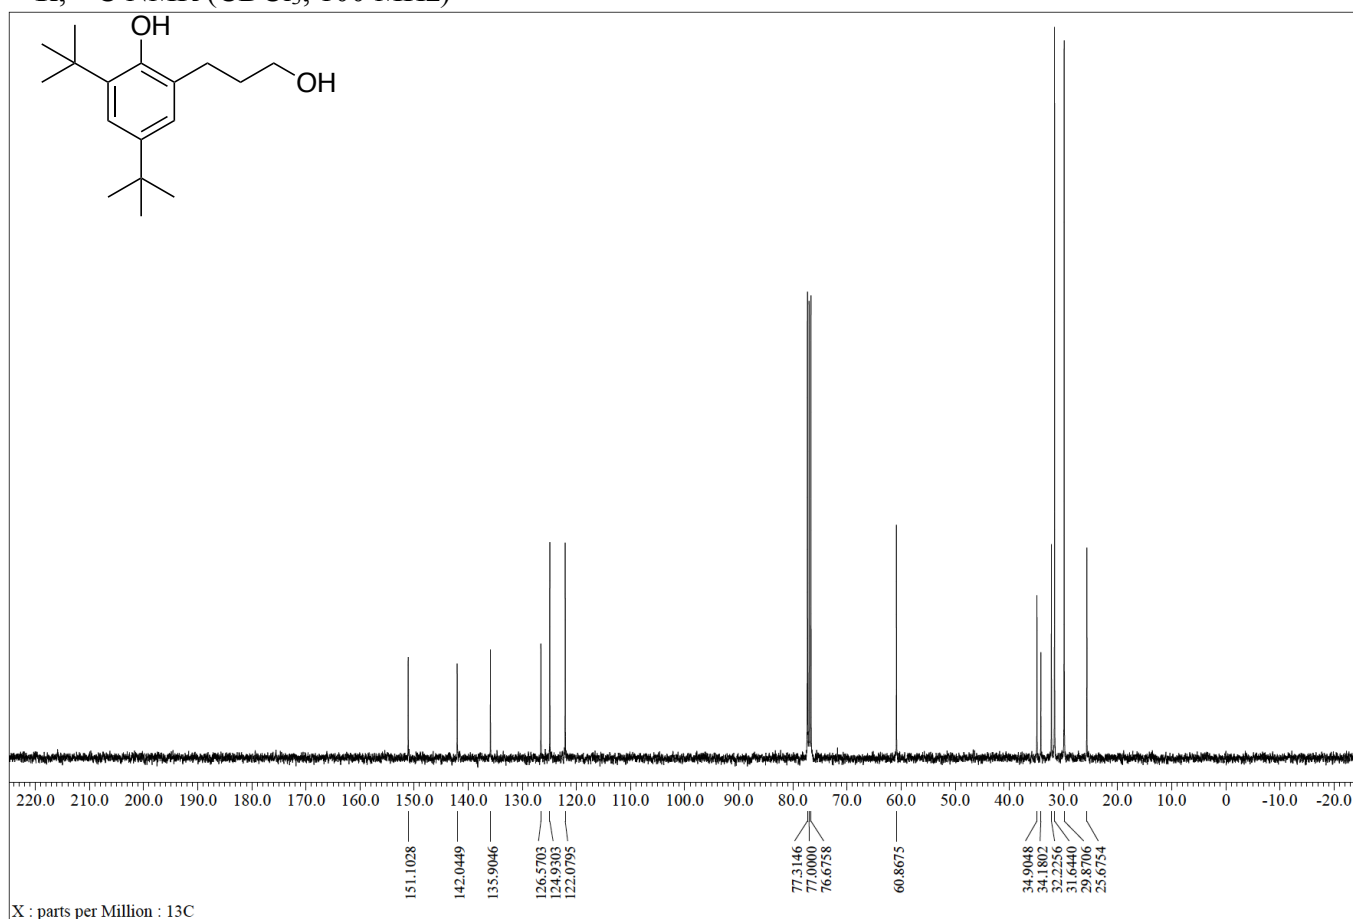



**1j**,  $^1\text{H}$  NMR ( $\text{CDCl}_3$ , 400 MHz)

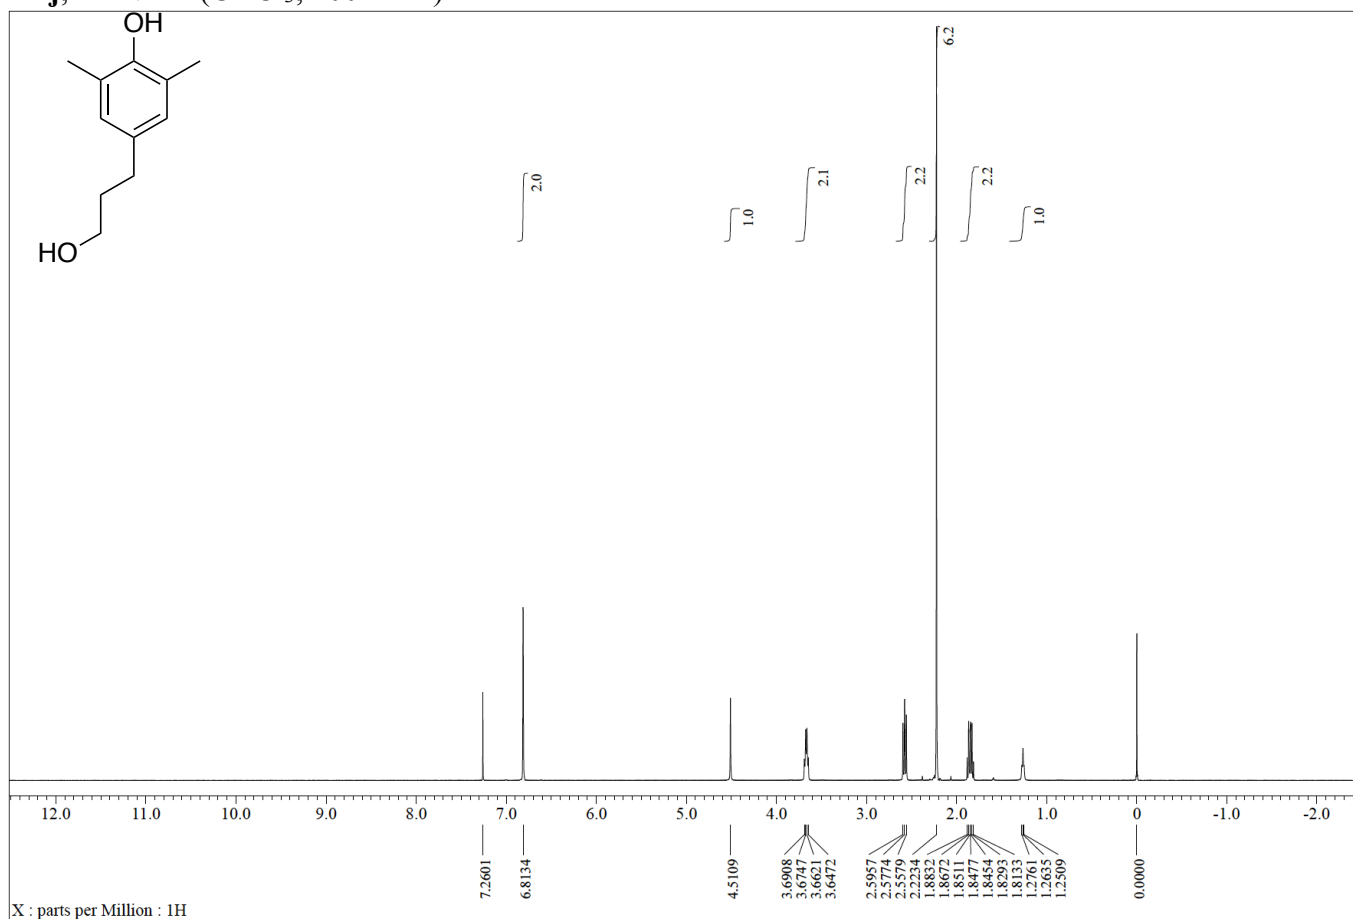

**1j**,  $^{13}\text{C}$  NMR ( $\text{CDCl}_3$ , 100 MHz)

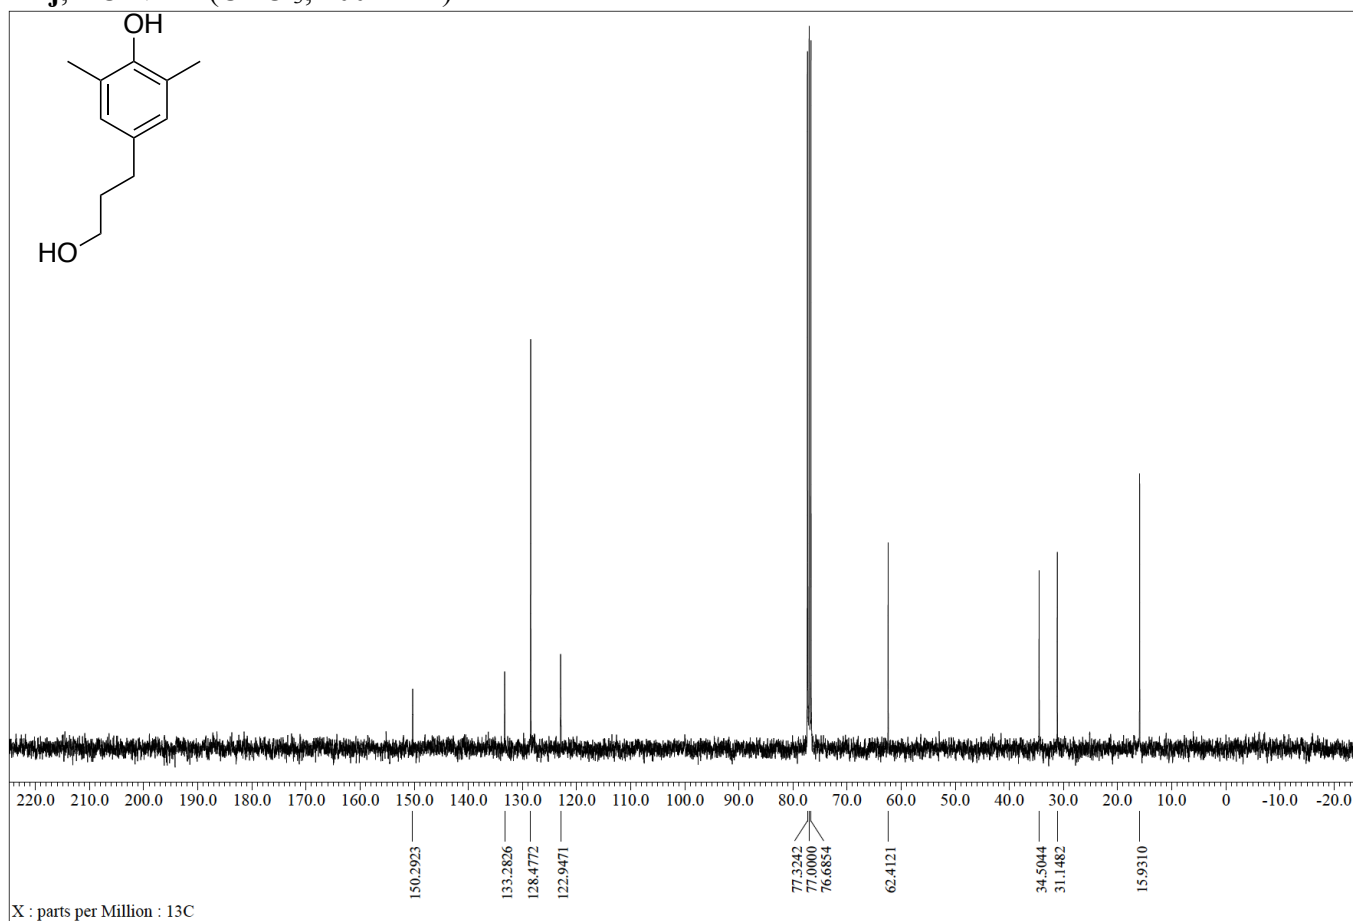

**1k**,  $^1\text{H}$  NMR ( $\text{CDCl}_3$ , 400 MHz)

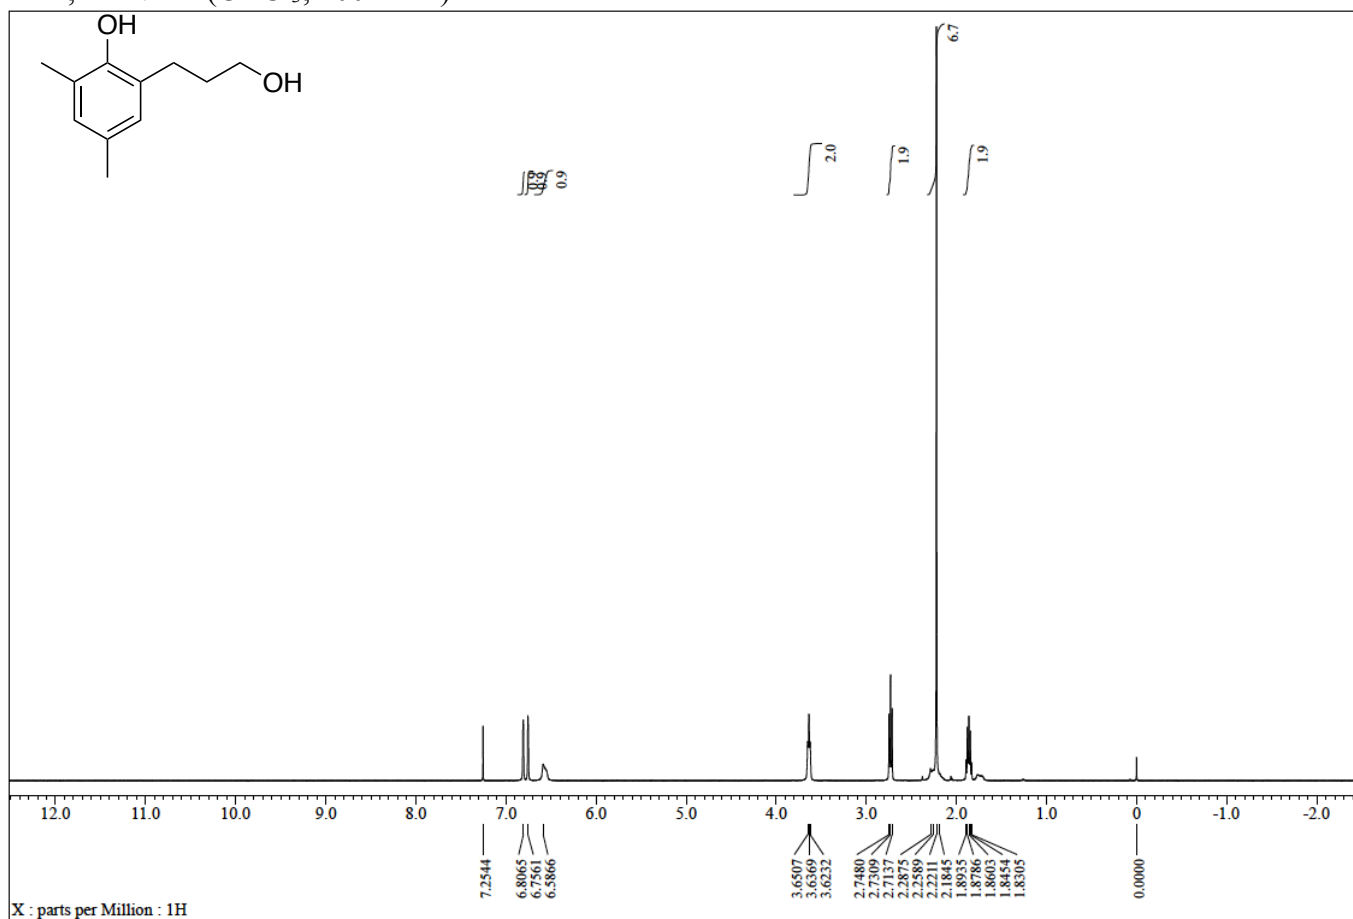

**1k**,  $^{13}\text{C}$  NMR ( $\text{CDCl}_3$ , 100 MHz)

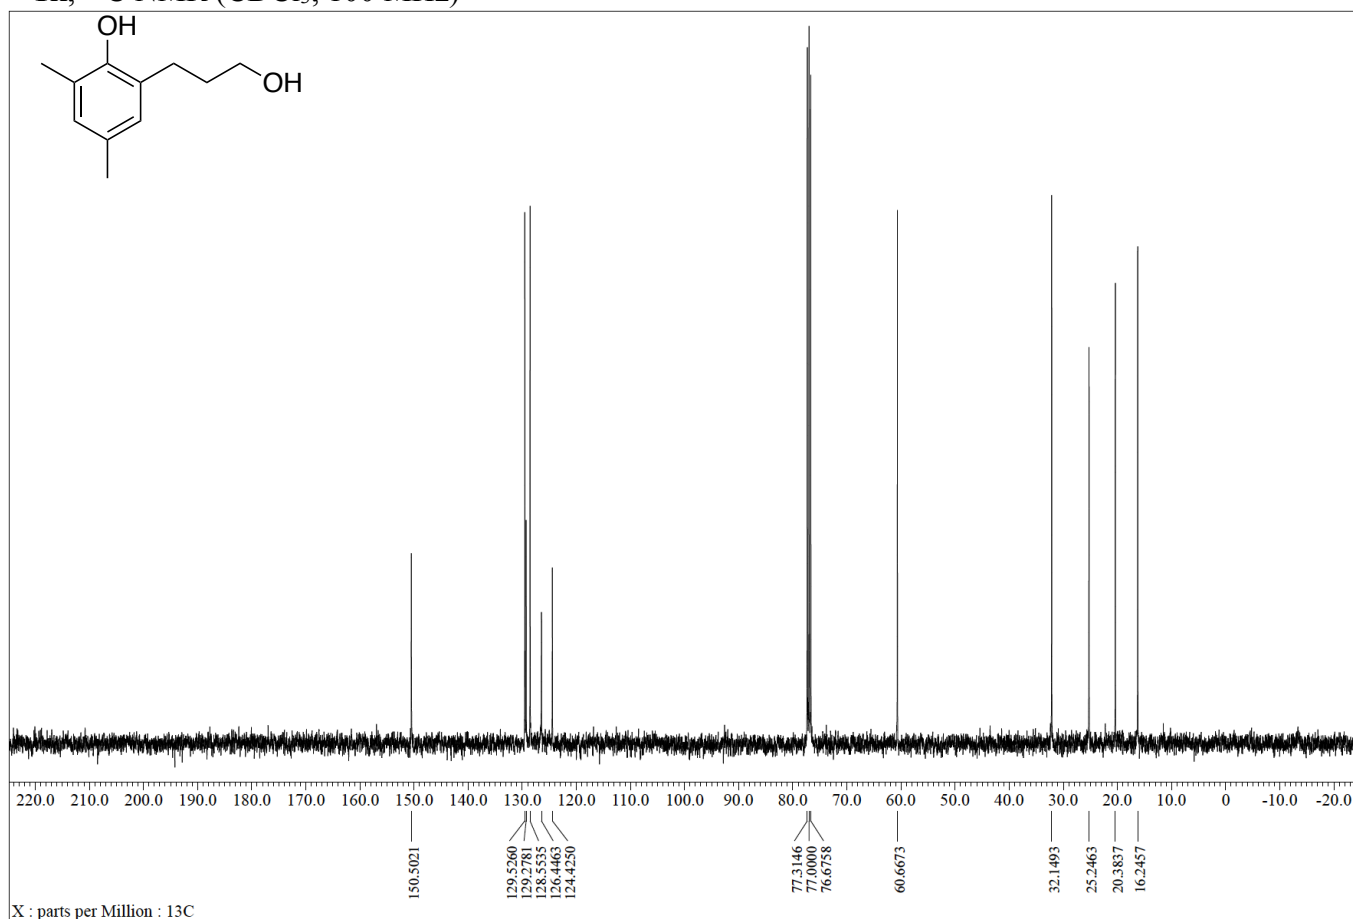

**11**,  $^1\text{H}$  NMR ( $\text{CDCl}_3$ , 400 MHz)

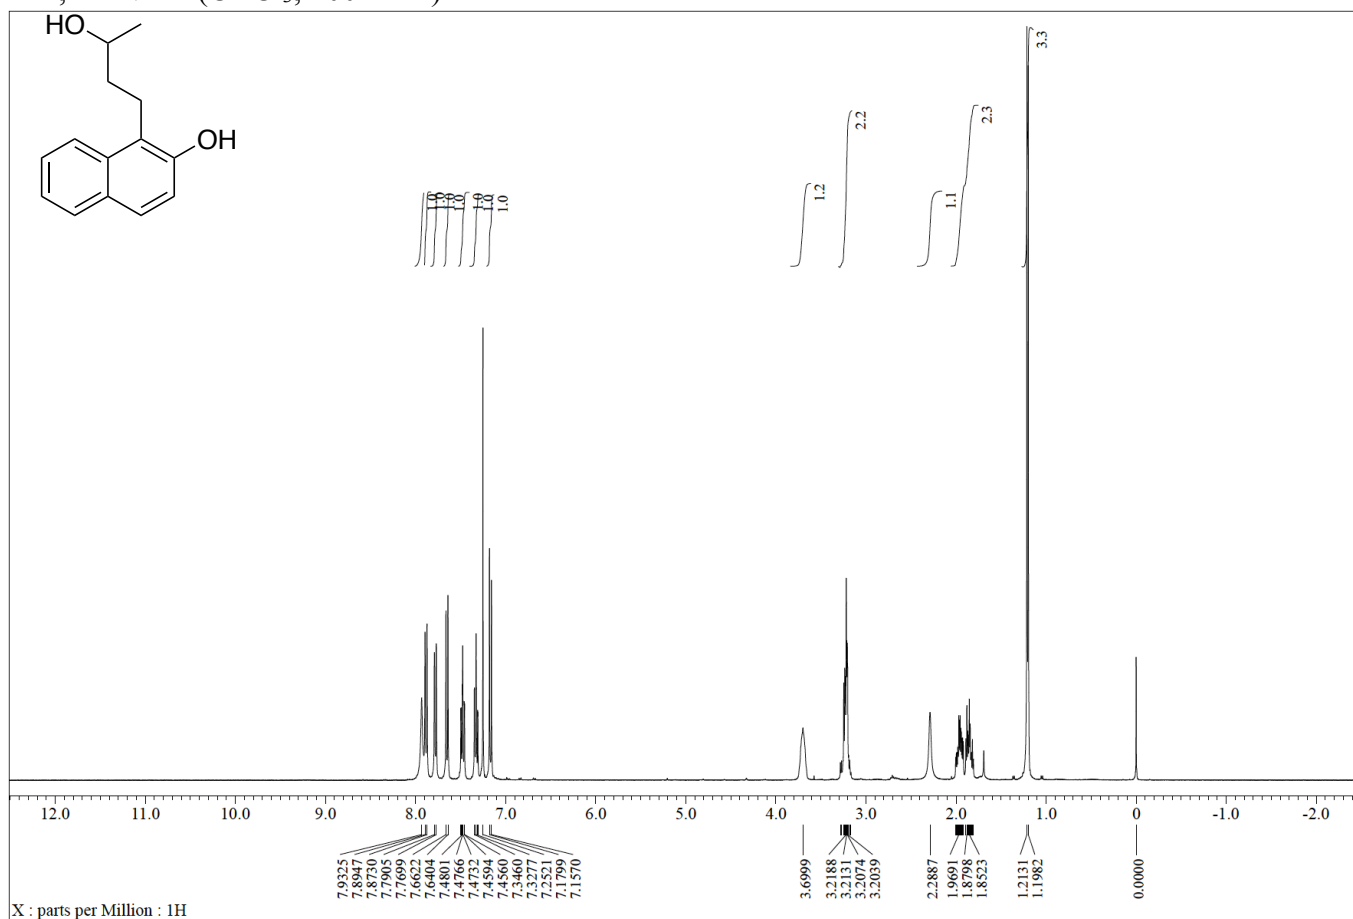

**11**,  $^{13}\text{C}$  NMR ( $\text{CDCl}_3$ , 100 MHz)

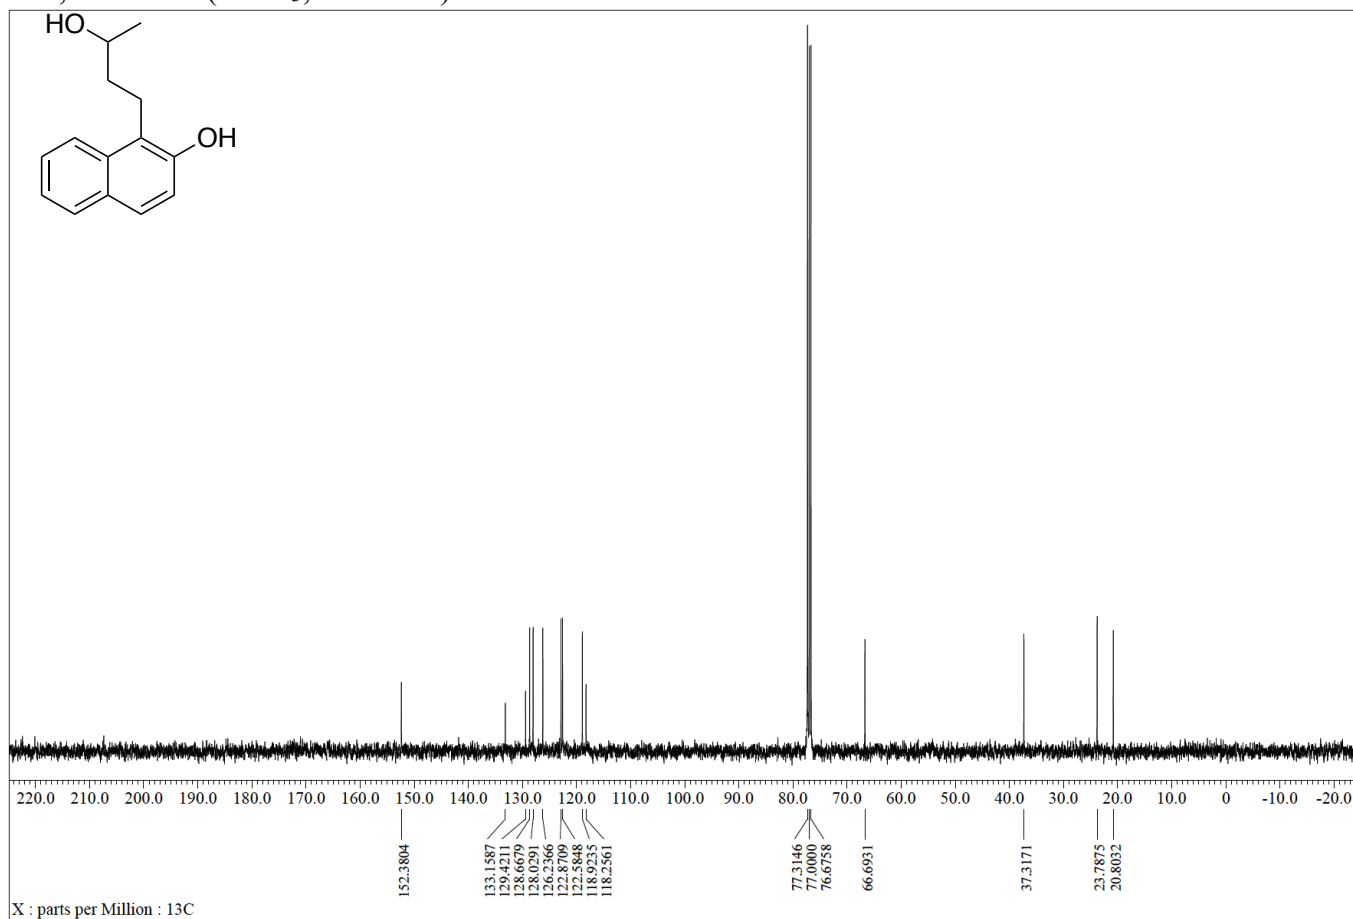



**1n**,  $^1\text{H}$  NMR ( $\text{CDCl}_3$ , 400 MHz)

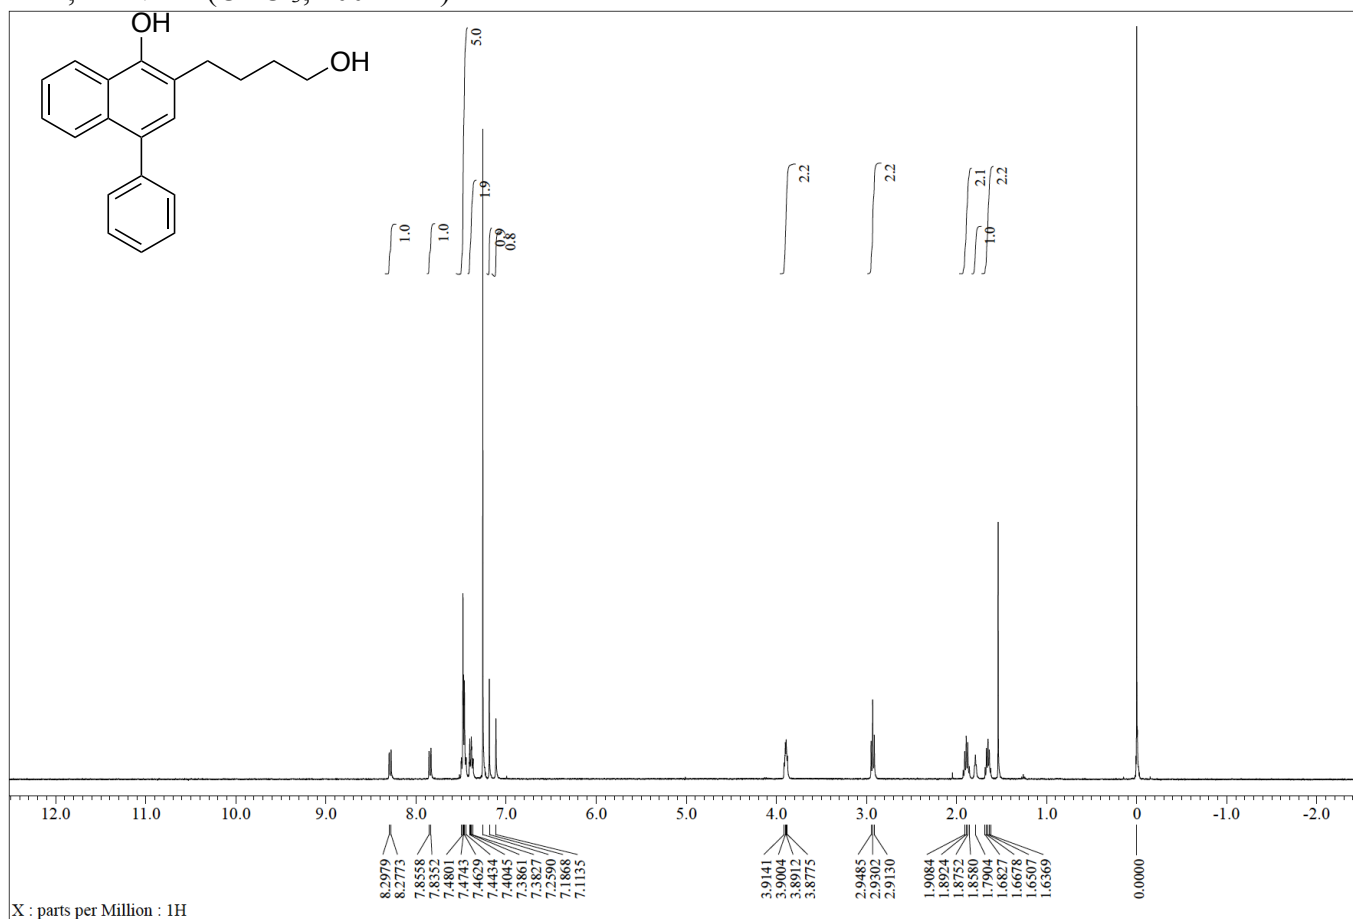

**1n**,  $^{13}\text{C}$  NMR ( $\text{C}_6\text{D}_6$ , 100 MHz)

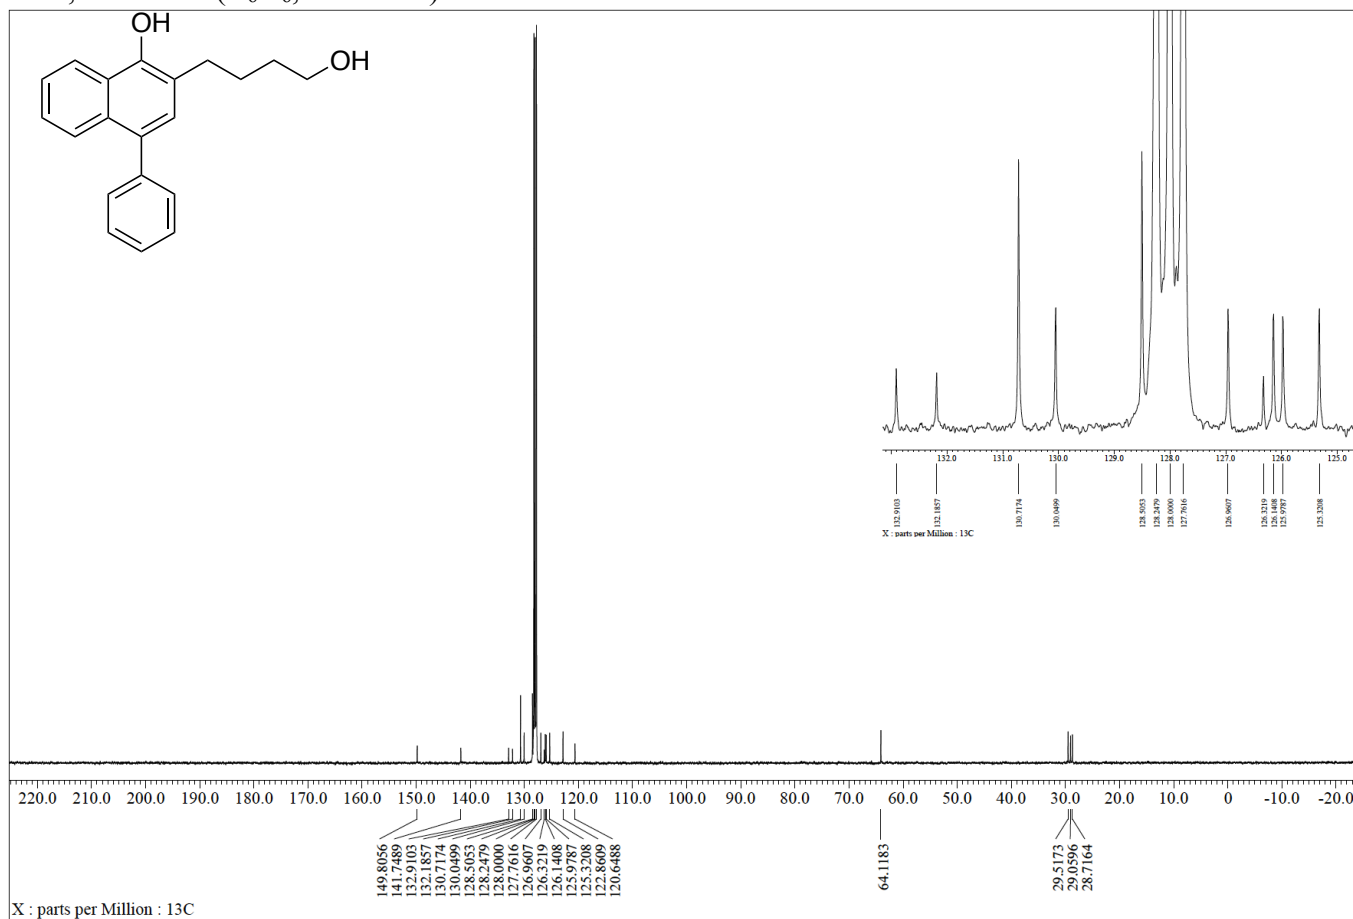

**3a**,  $^1\text{H}$  NMR ( $\text{CDCl}_3$ , 400 MHz)

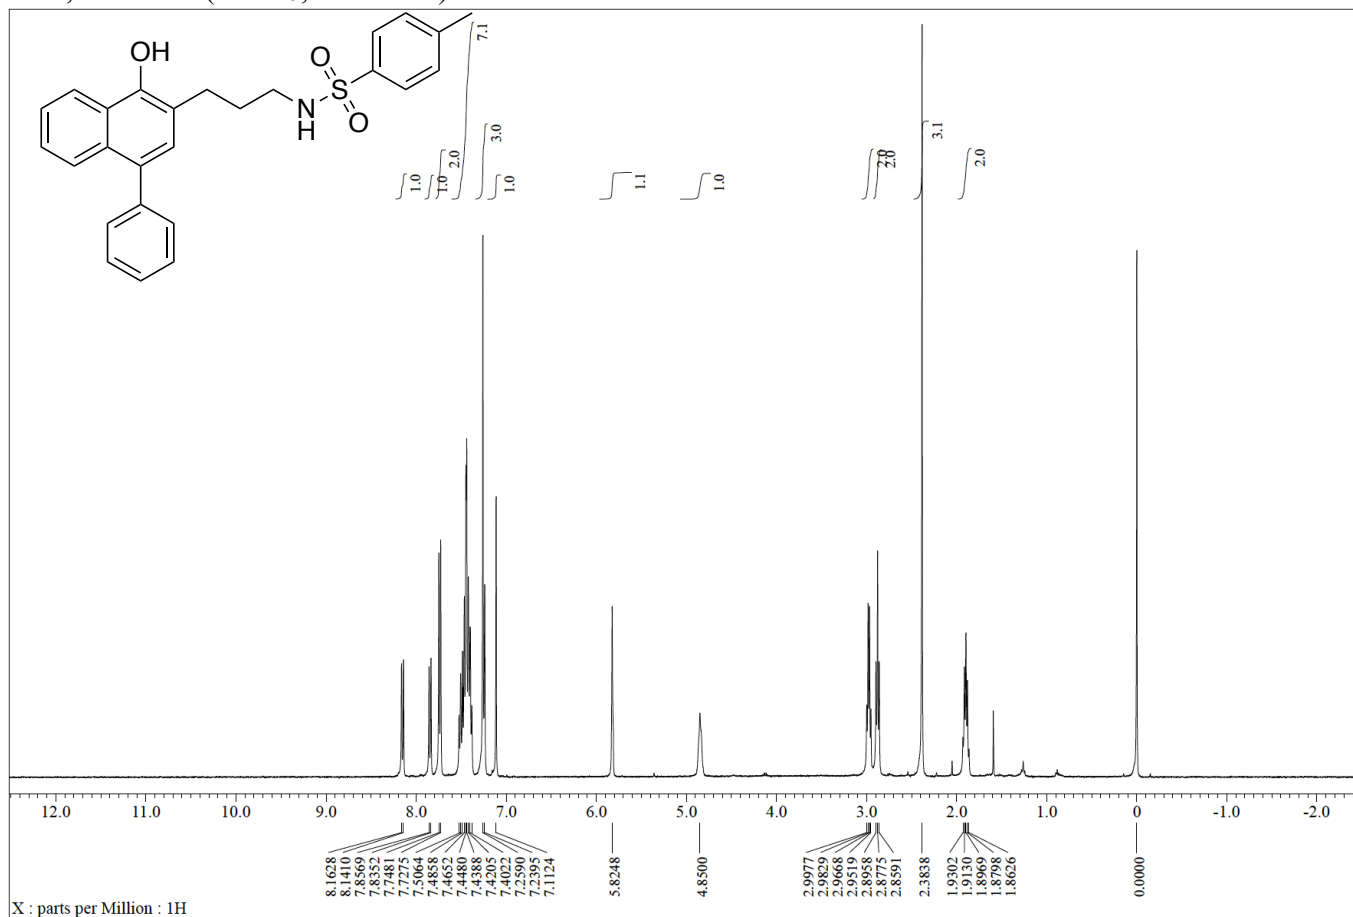

**3a**,  $^{13}\text{C}$  NMR ( $\text{CDCl}_3$ , 100 MHz)

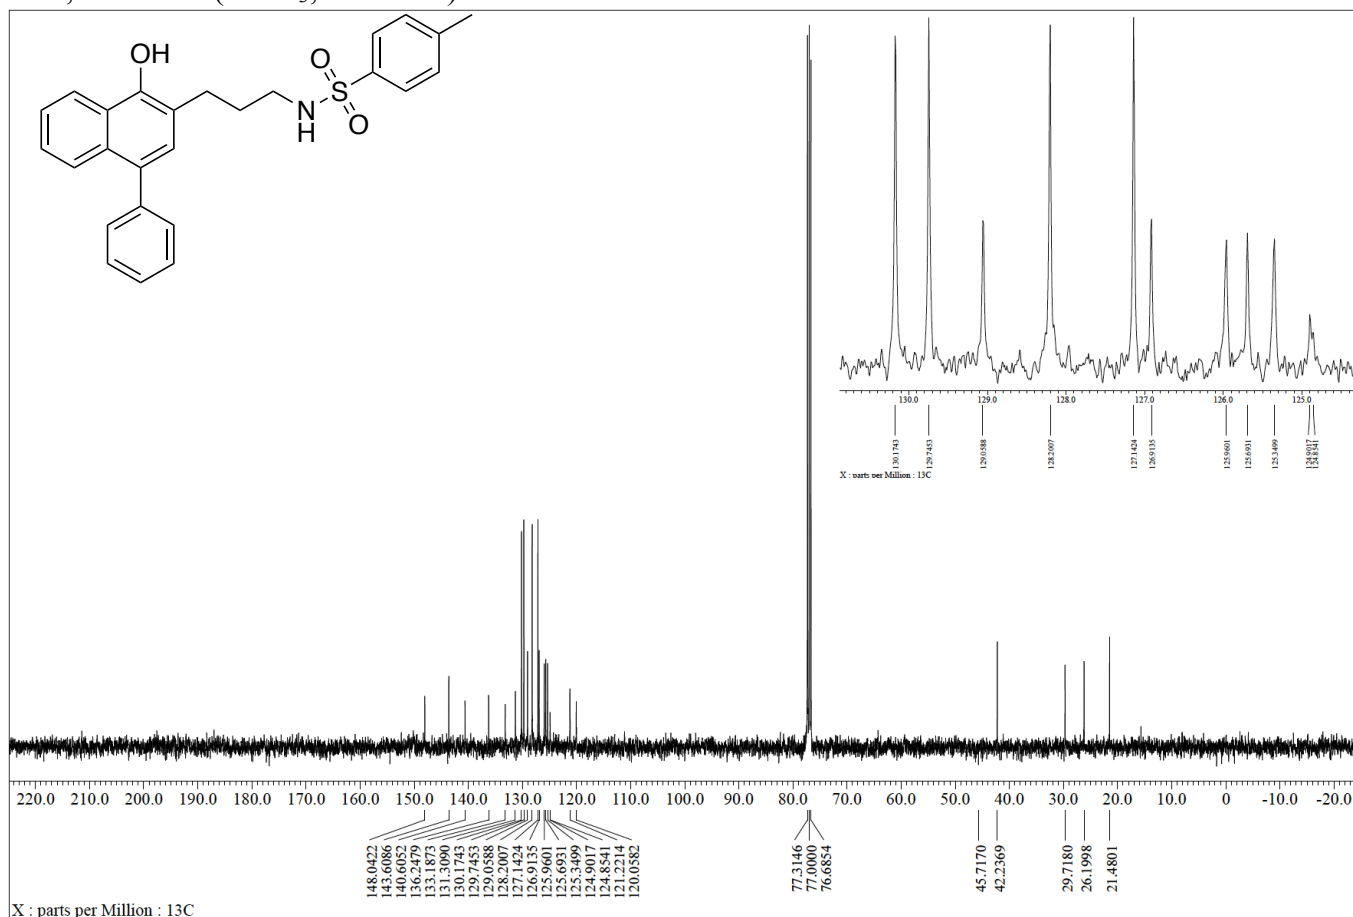

**3aa**,  $^1\text{H}$  NMR (DMSO- $d_6$ , 400 MHz)

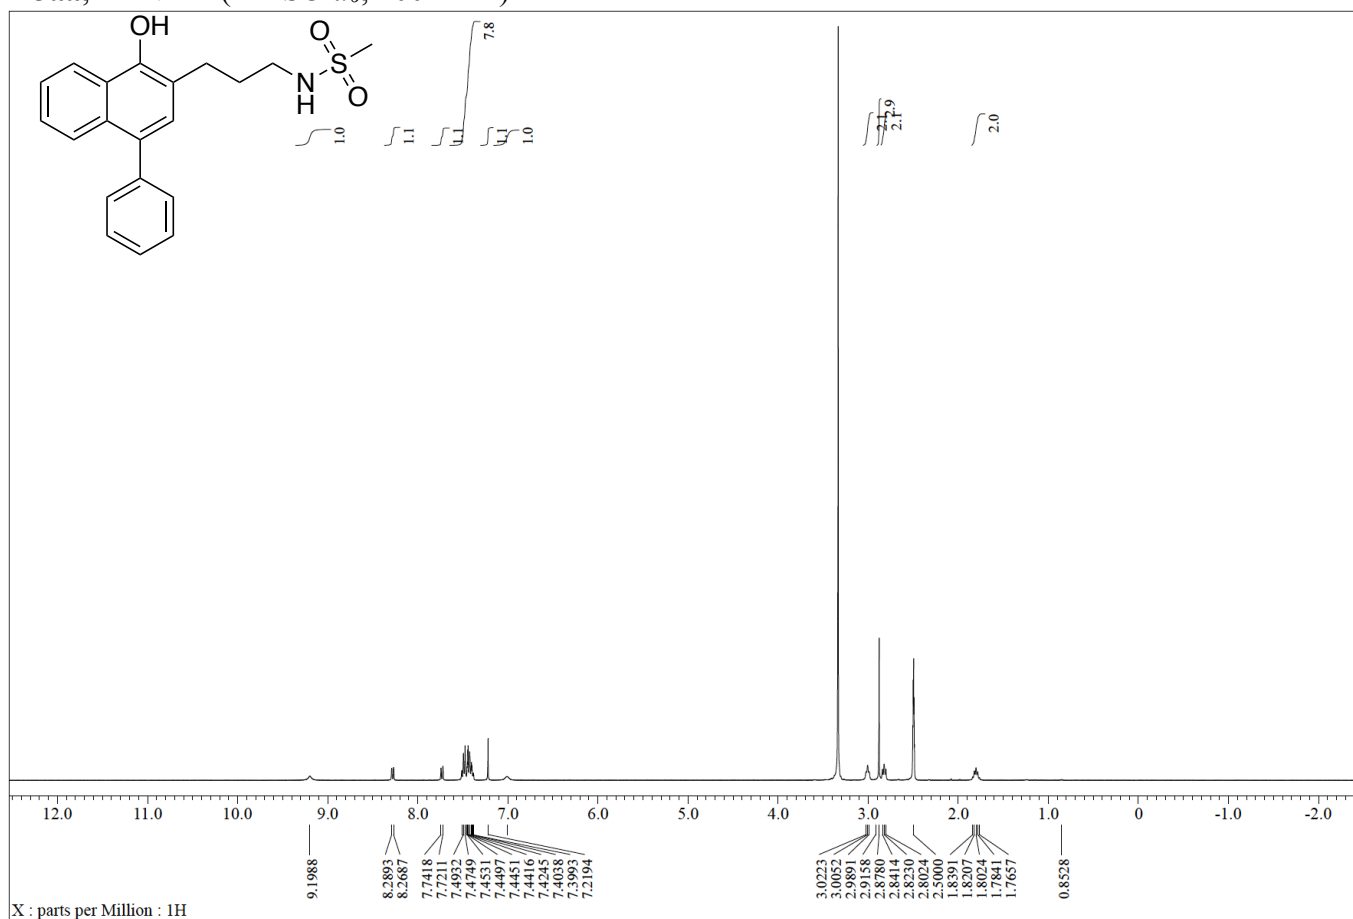

**3aa**,  $^{13}\text{C}$  NMR (DMSO- $d_6$ , 100 MHz)

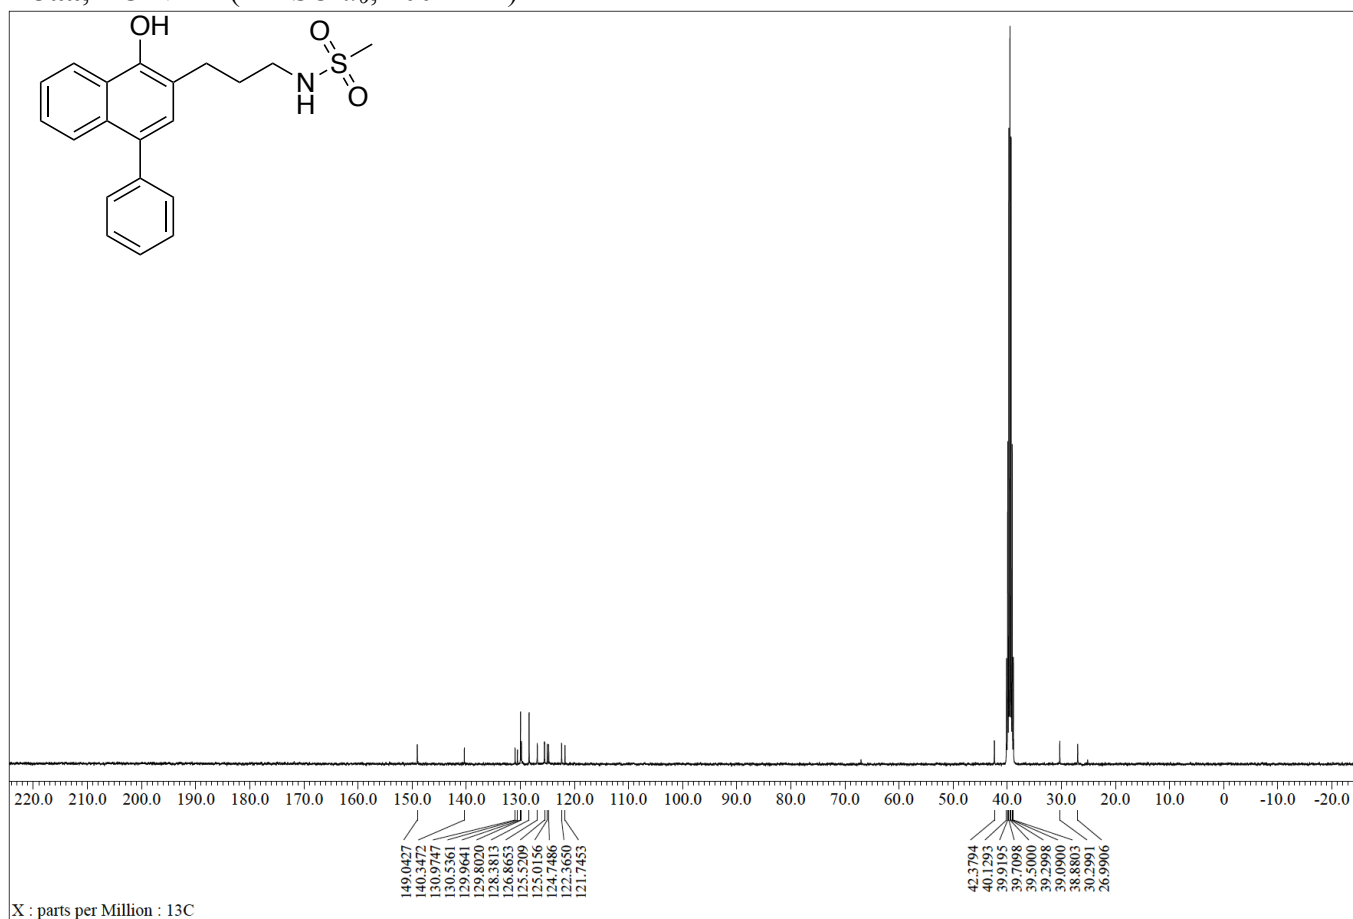

**3ab**,  $^1\text{H}$  NMR ( $\text{CDCl}_3$ , 400 MHz)

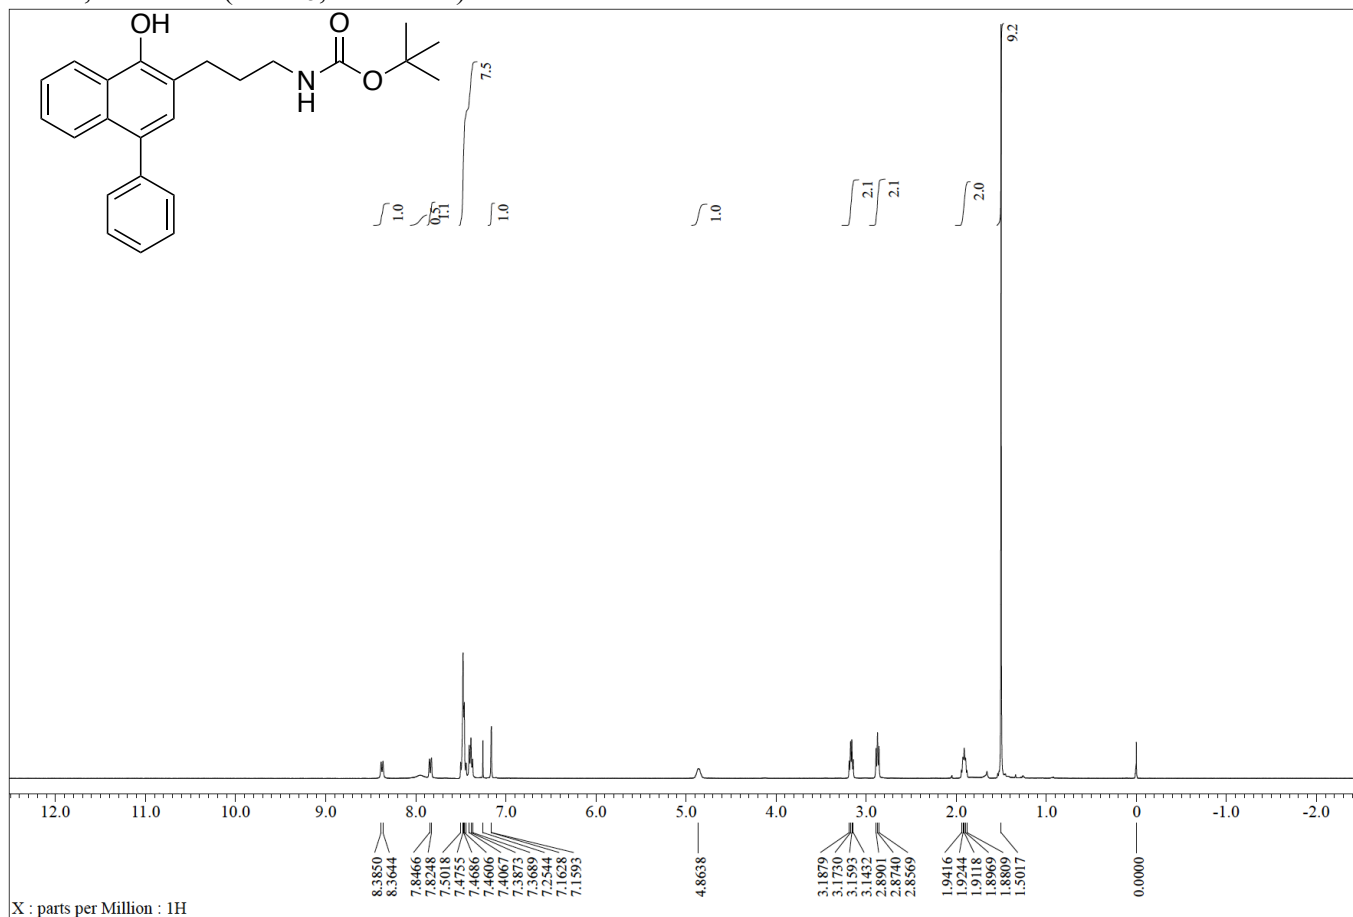

**3ab**,  $^{13}\text{C}$  NMR ( $\text{CDCl}_3$ , 100 MHz)

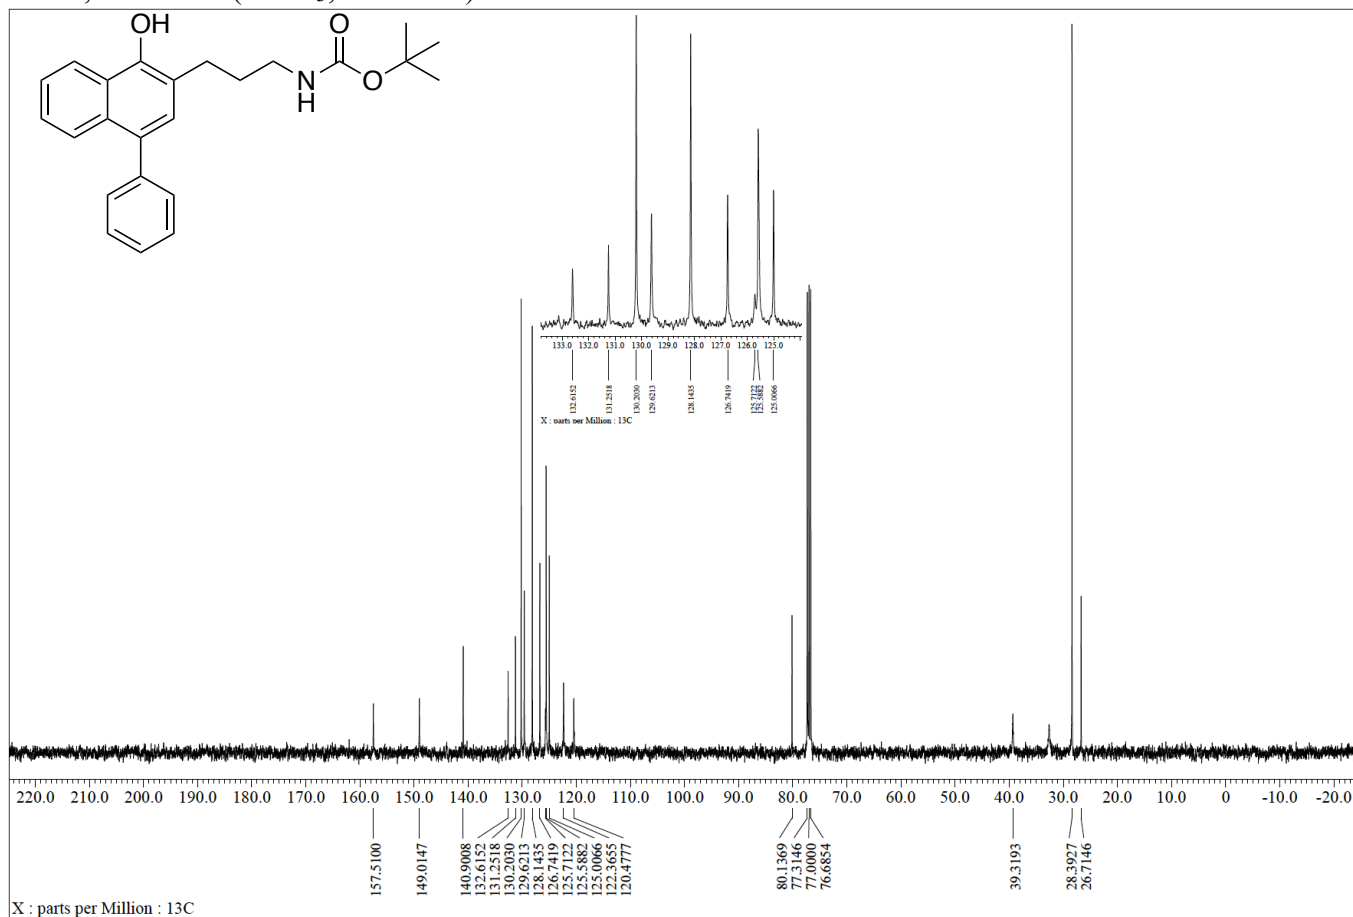



**3b**,  $^1\text{H}$  NMR ( $\text{CDCl}_3$ , 400 MHz)

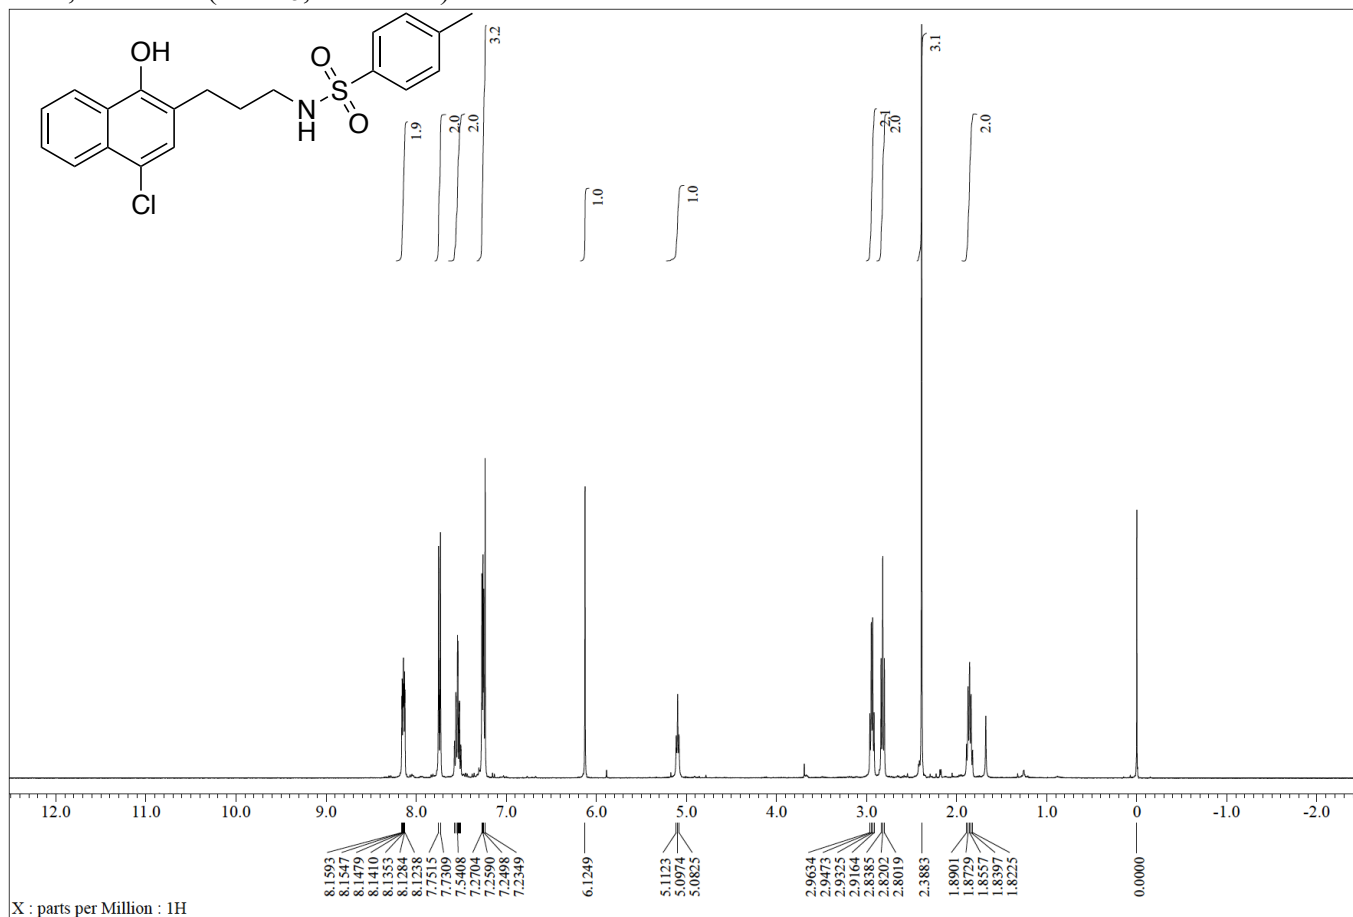

**3b**,  $^{13}\text{C}$  NMR ( $\text{CDCl}_3$ , 100 MHz)

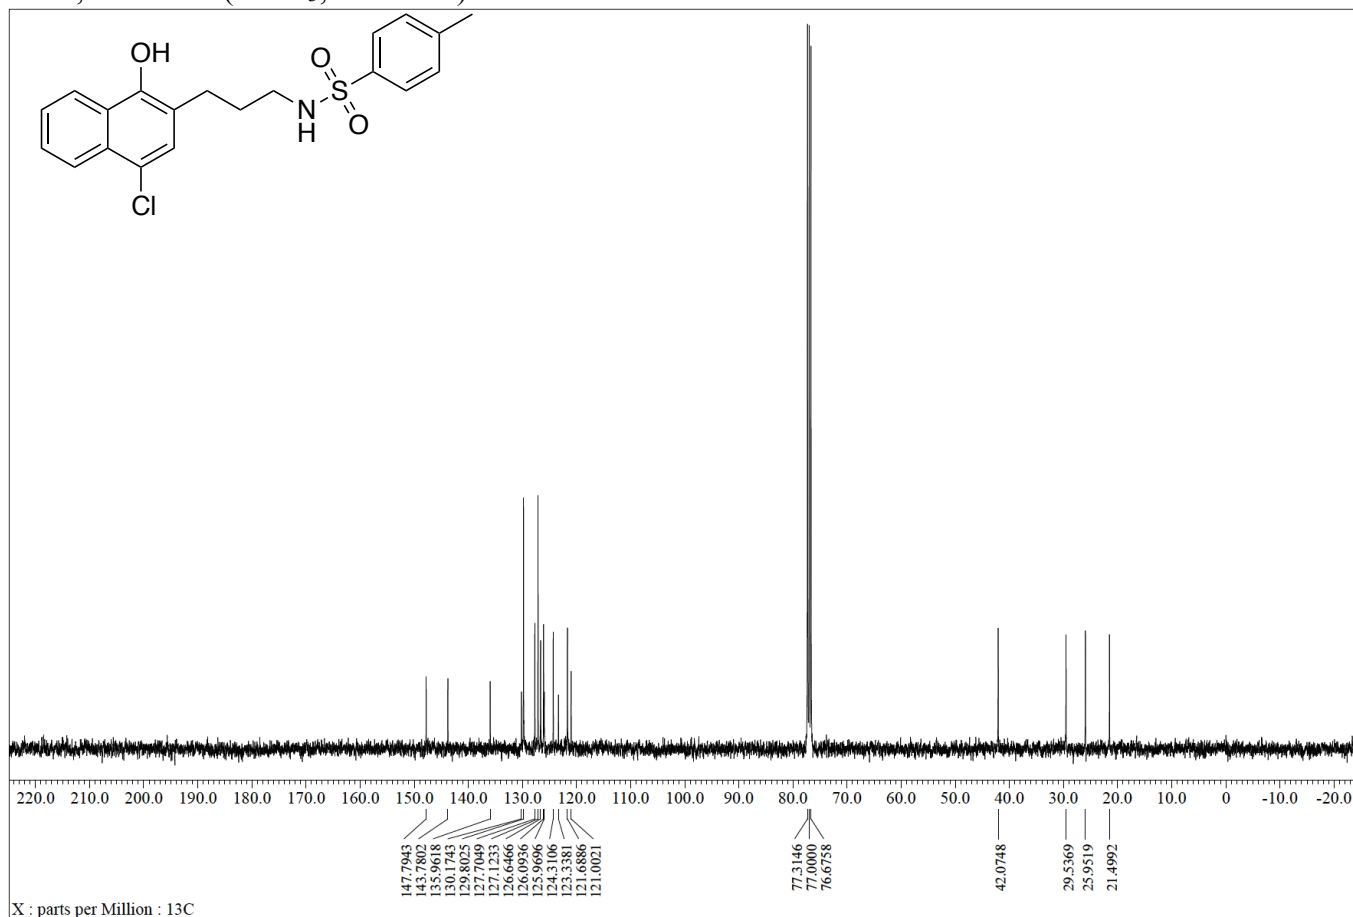

**3c**,  $^1\text{H}$  NMR ( $\text{CDCl}_3$ , 400 MHz)

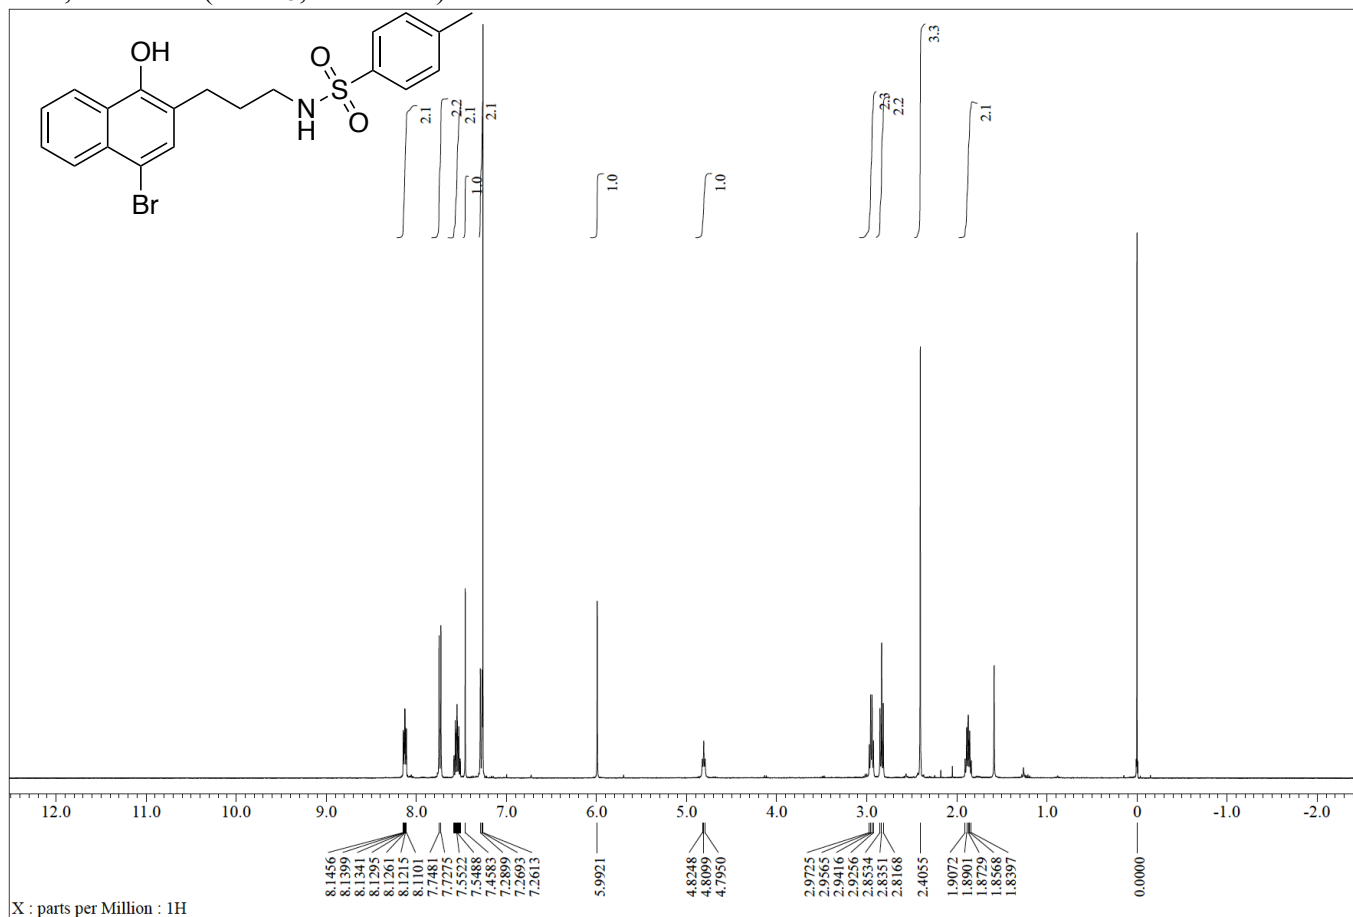

**3c**,  $^{13}\text{C}$  NMR ( $\text{CD}_2\text{Cl}_2$ , 100 MHz)

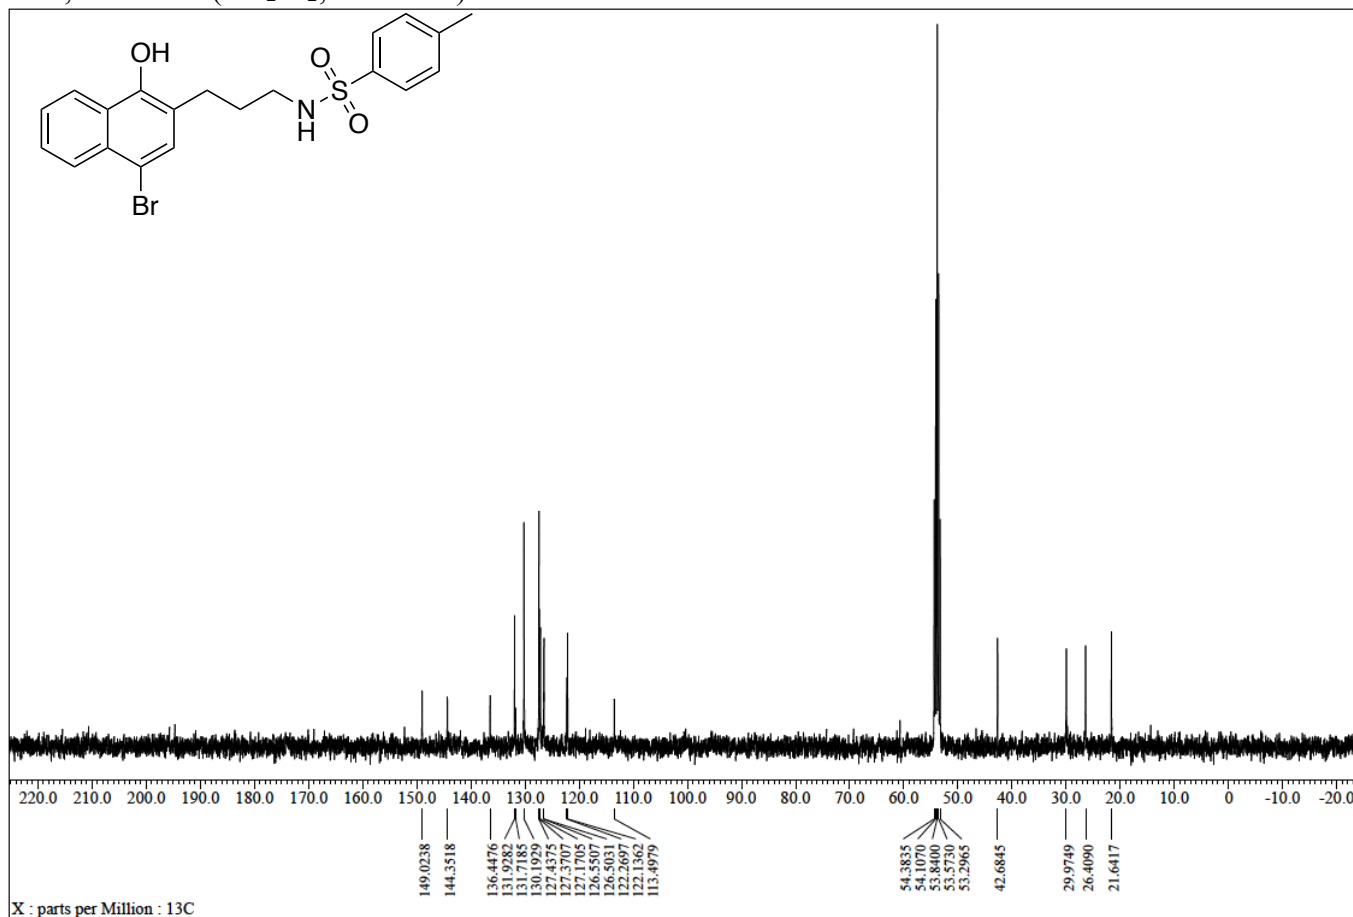

**3d**,  $^1\text{H}$  NMR ( $\text{CDCl}_3$ , 400 MHz)

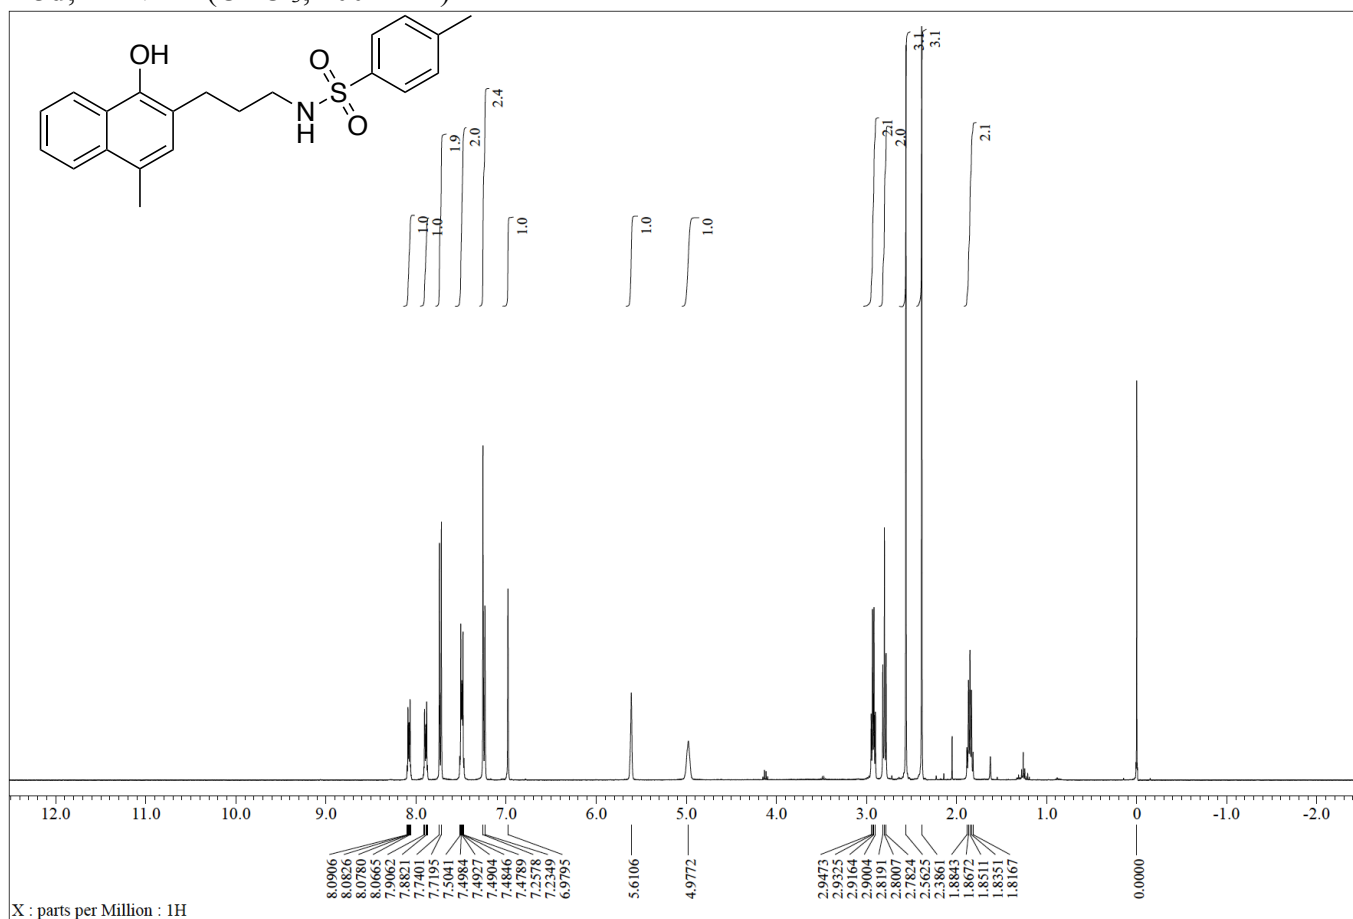

**3d**,  $^{13}\text{C}$  NMR ( $\text{CDCl}_3$ , 100 MHz)

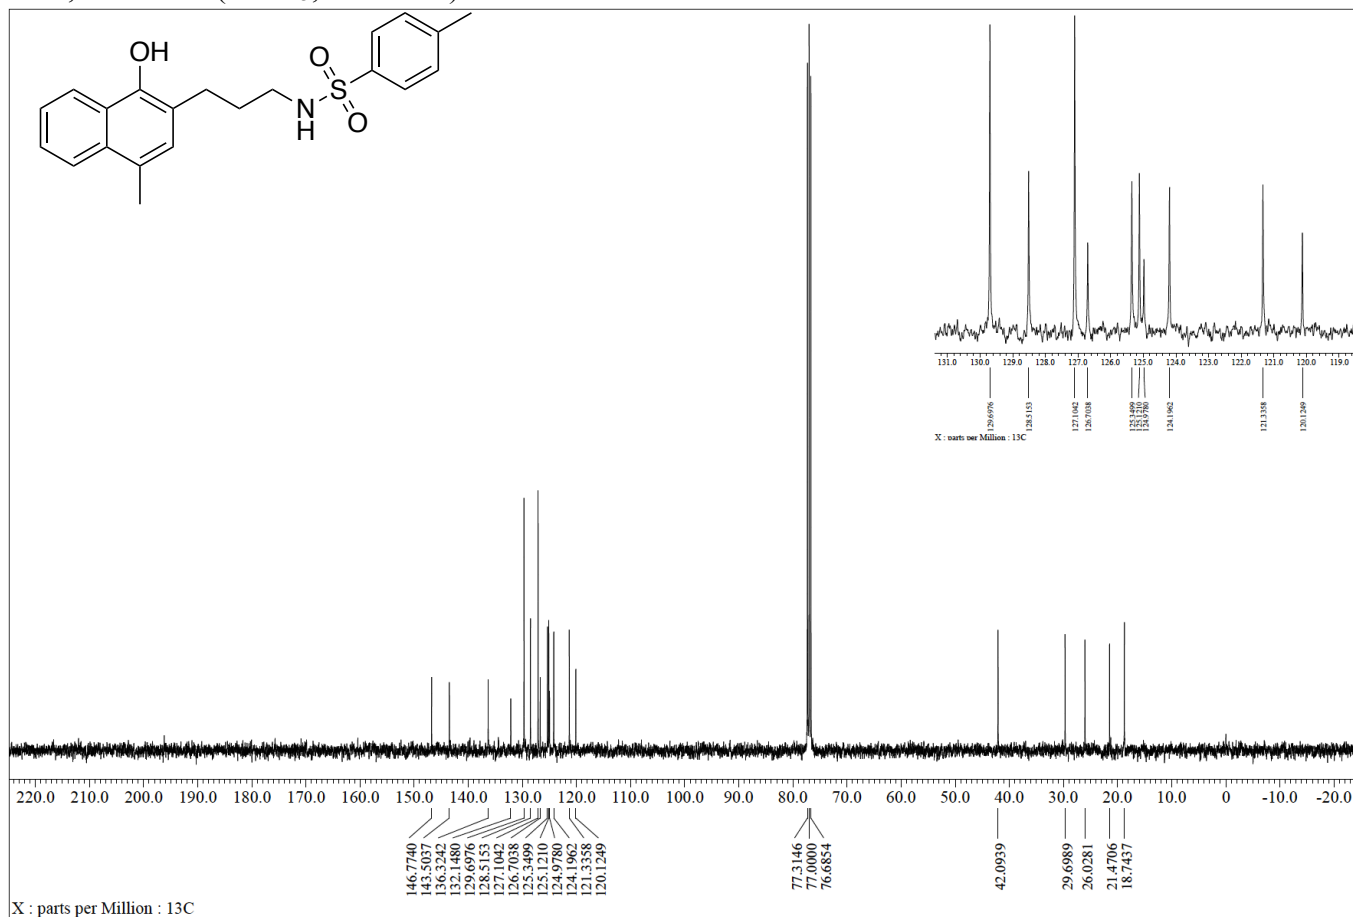

**3e**,  $^1\text{H}$  NMR ( $\text{CDCl}_3$ , 400 MHz)

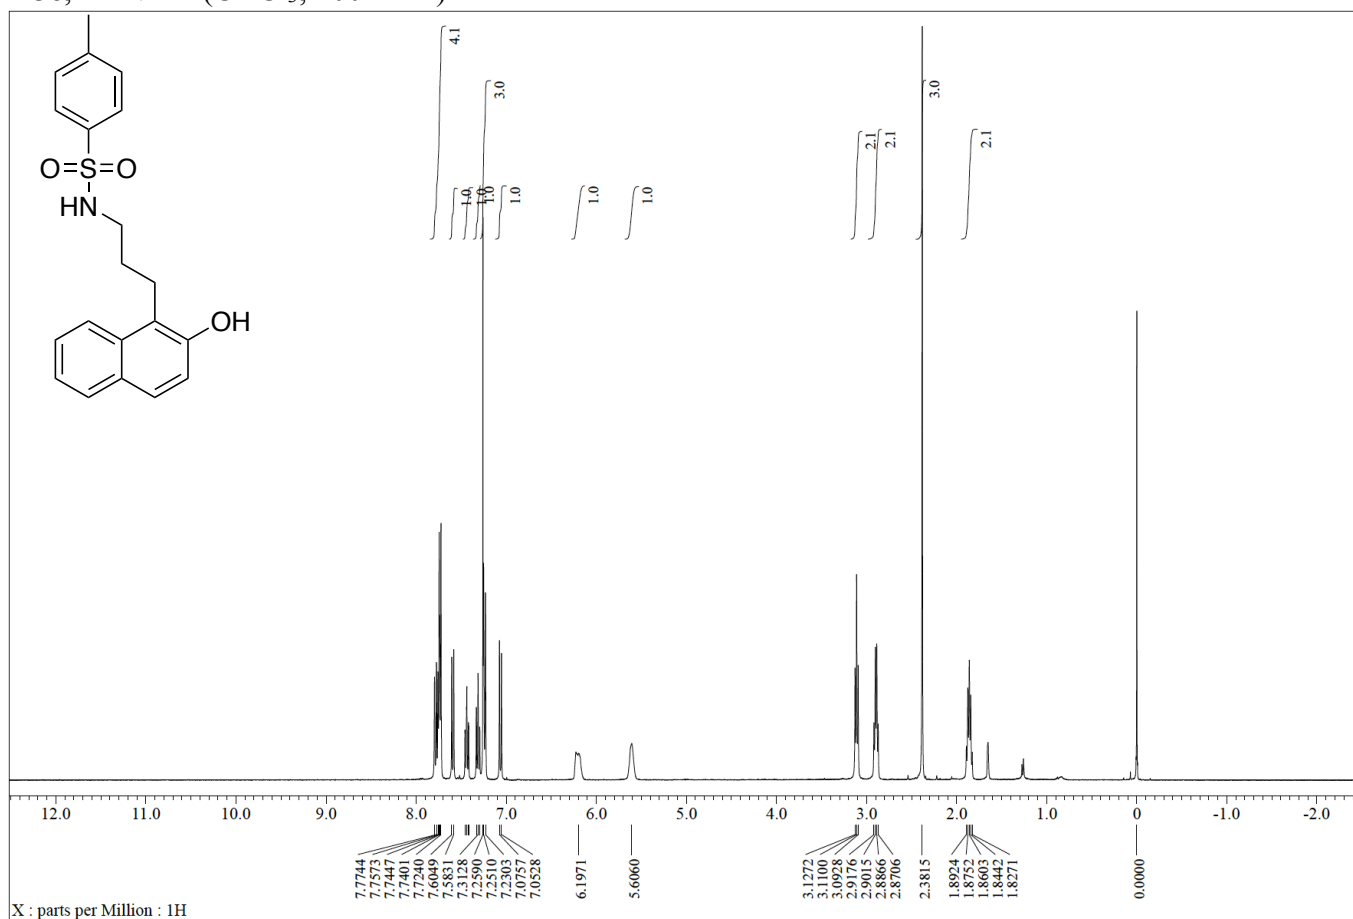

**3e**,  $^{13}\text{C}$  NMR ( $\text{CDCl}_3$ , 100 MHz)

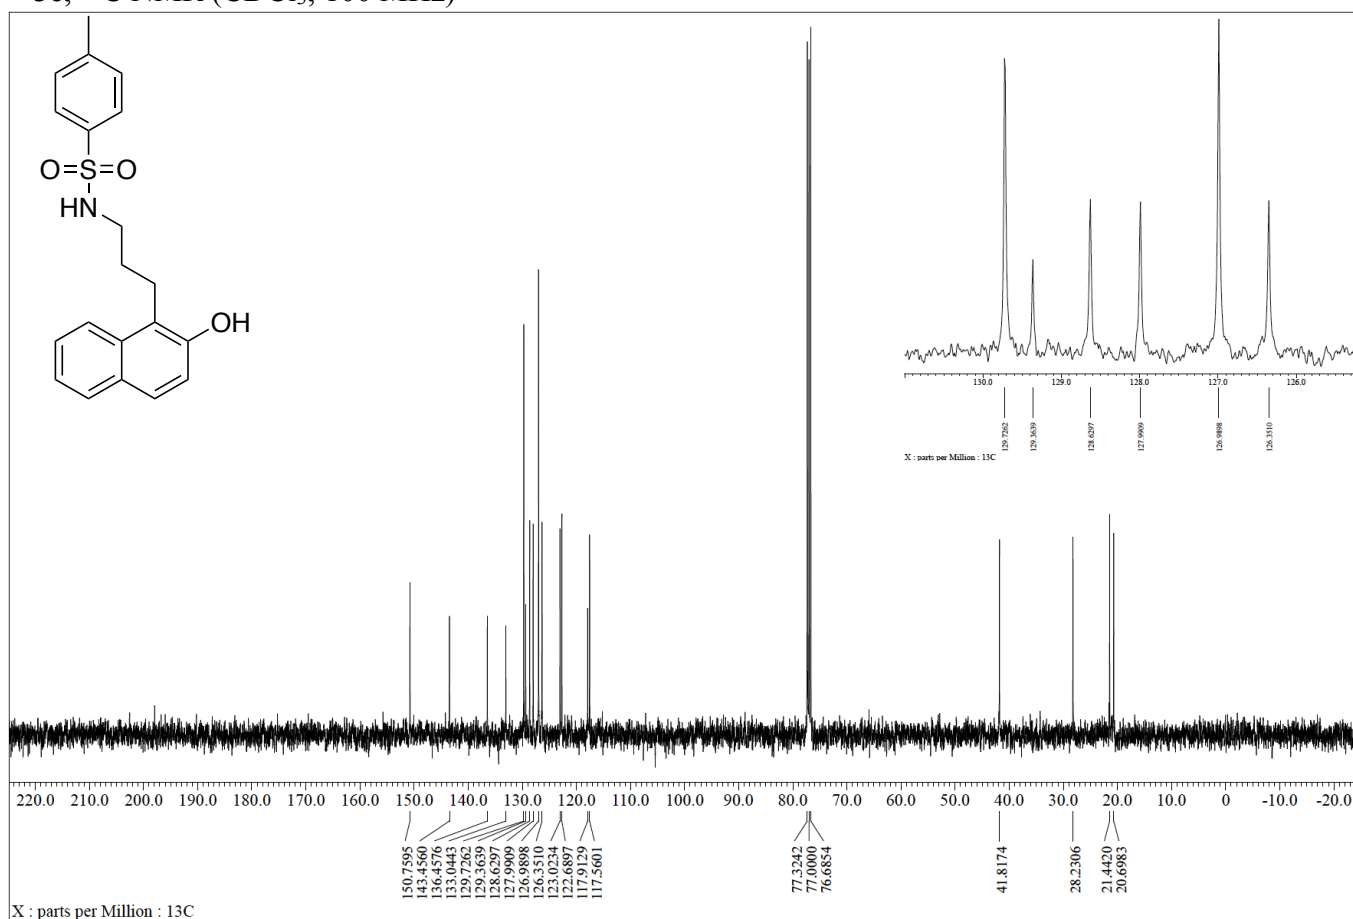

**3ea**,  $^1\text{H}$  NMR ( $\text{CDCl}_3$ , 400 MHz)

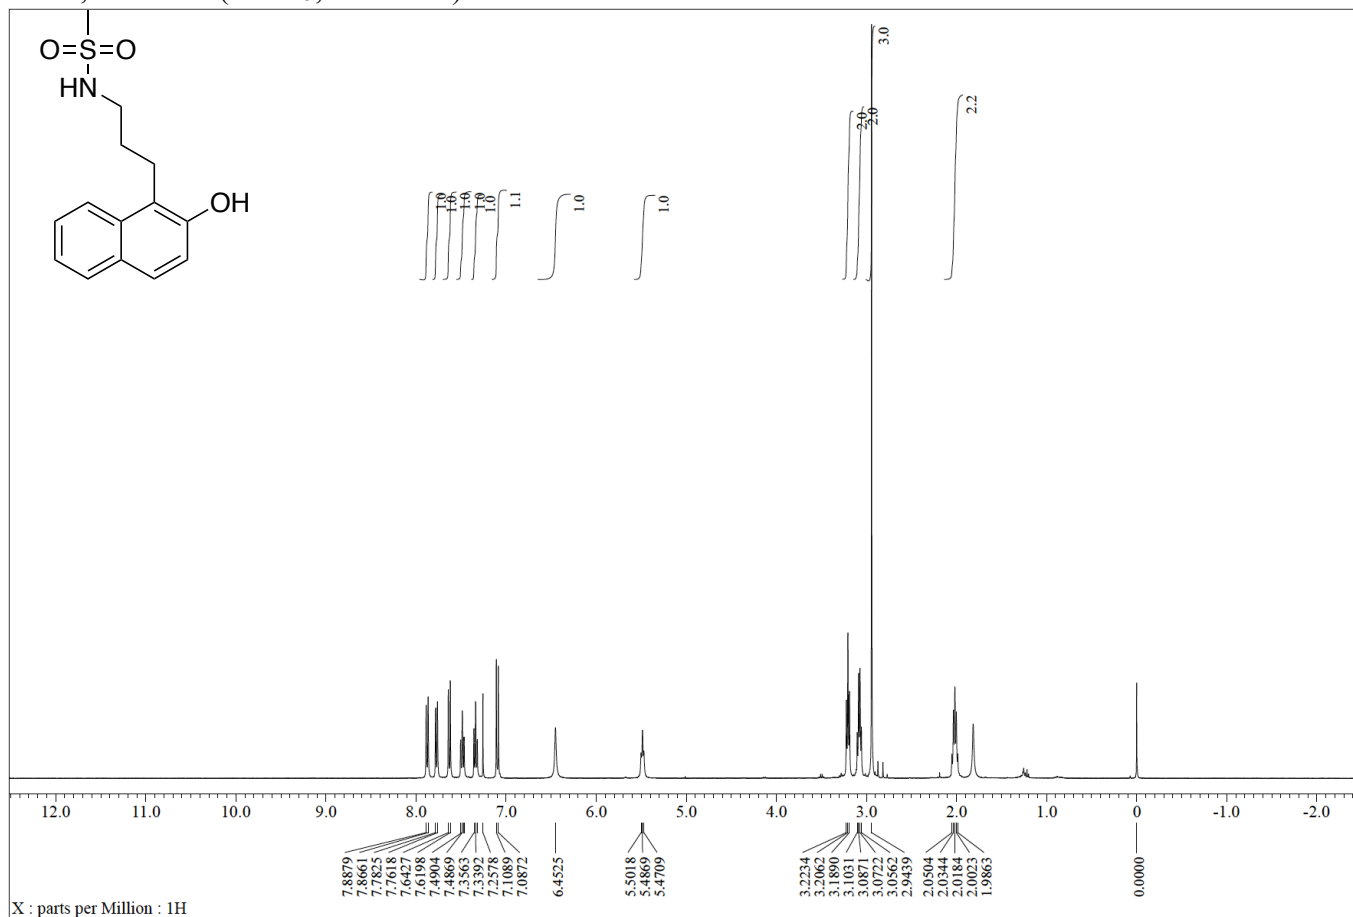

**3ea**,  $^{13}\text{C}$  NMR ( $\text{CDCl}_3$ , 100 MHz)

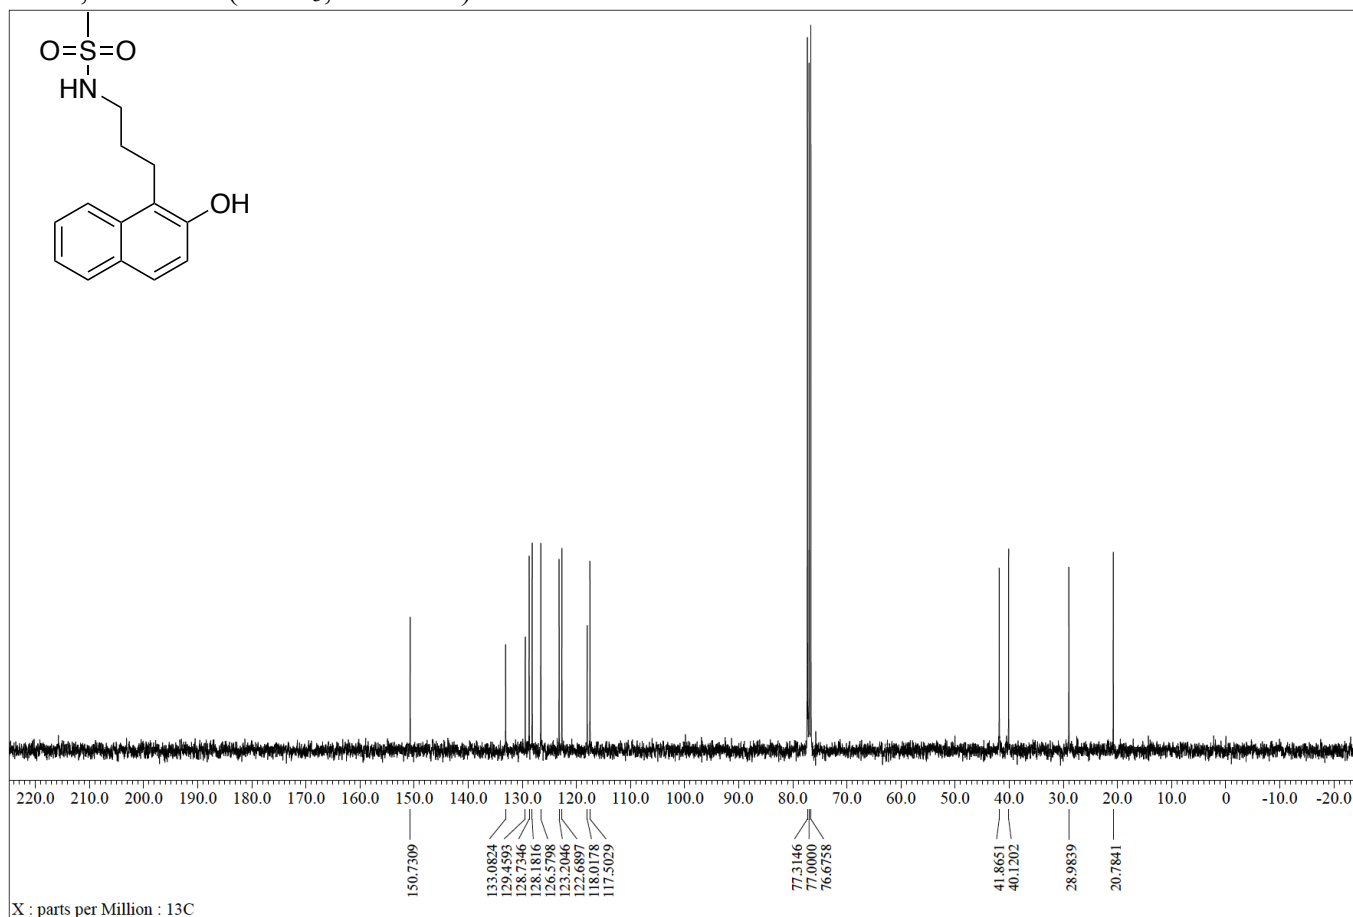

**3f**,  $^1\text{H}$  NMR ( $\text{CDCl}_3$ , 400 MHz)

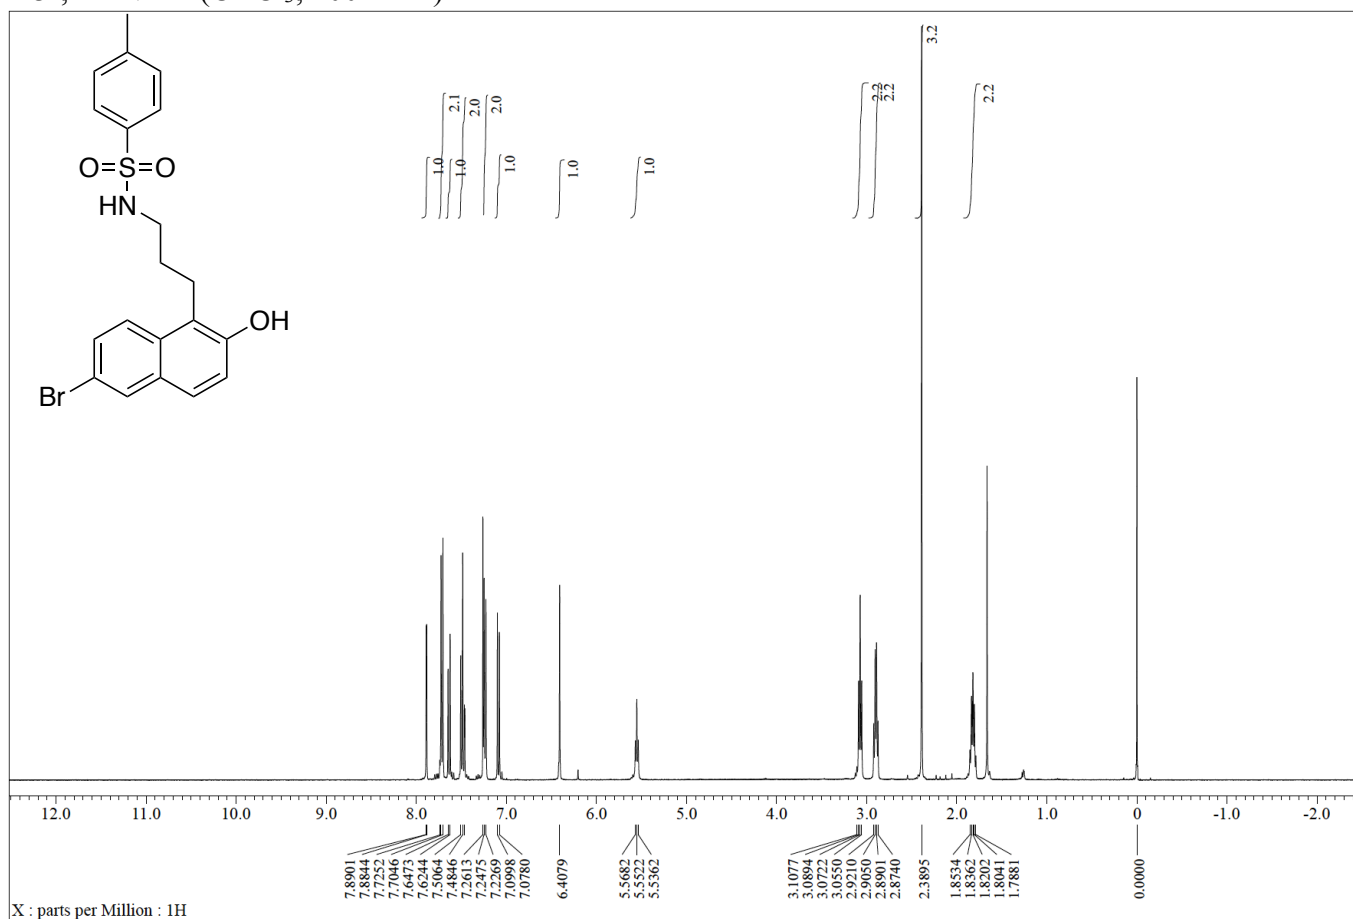

**3f**,  $^{13}\text{C}$  NMR ( $\text{CDCl}_3$ , 100 MHz)

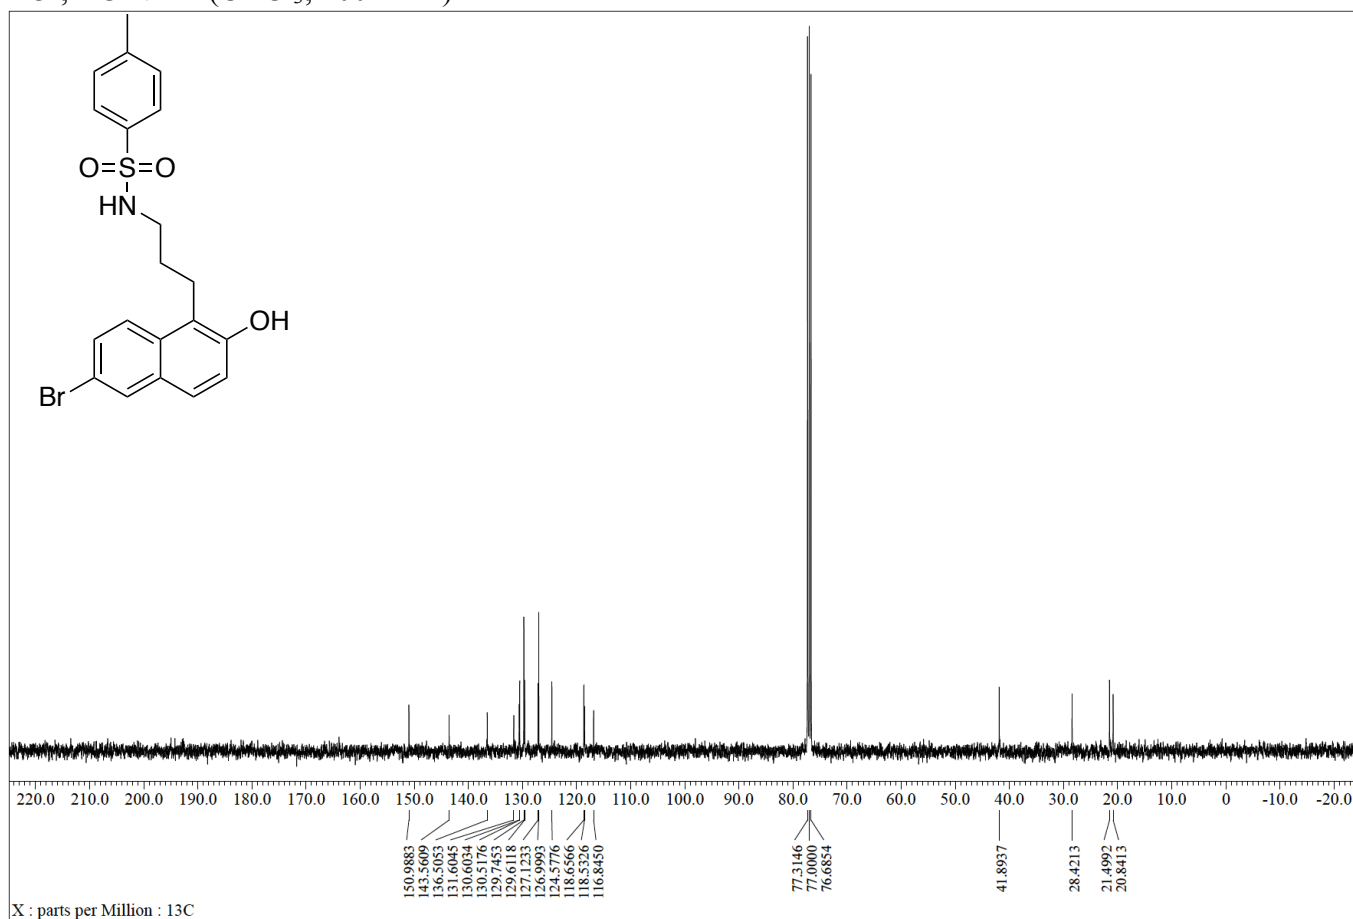

**3g**,  $^1\text{H}$  NMR ( $\text{CDCl}_3$ , 400 MHz)

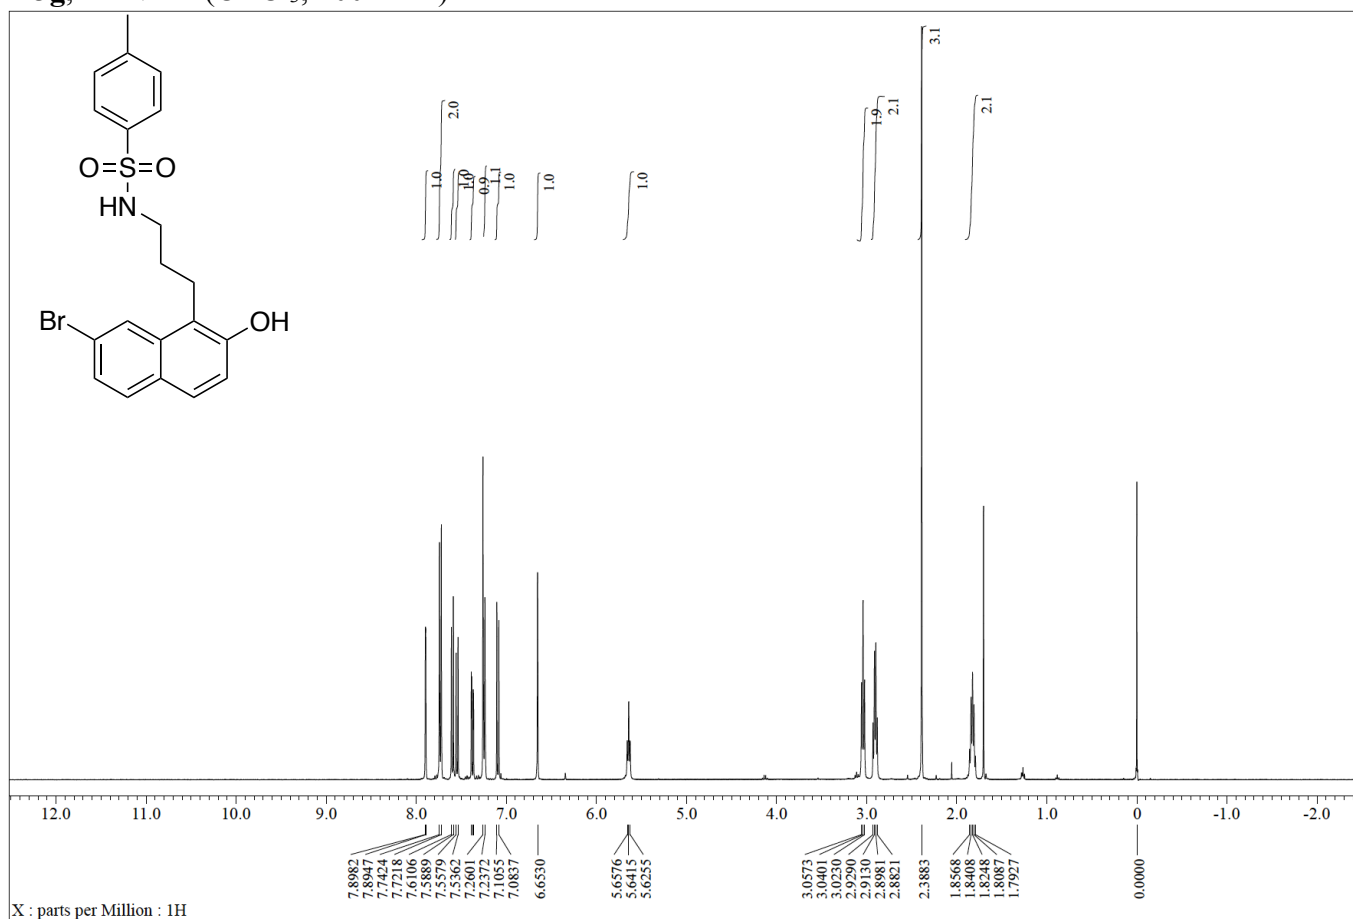

**3g**,  $^{13}\text{C}$  NMR ( $\text{CDCl}_3$ , 100 MHz)

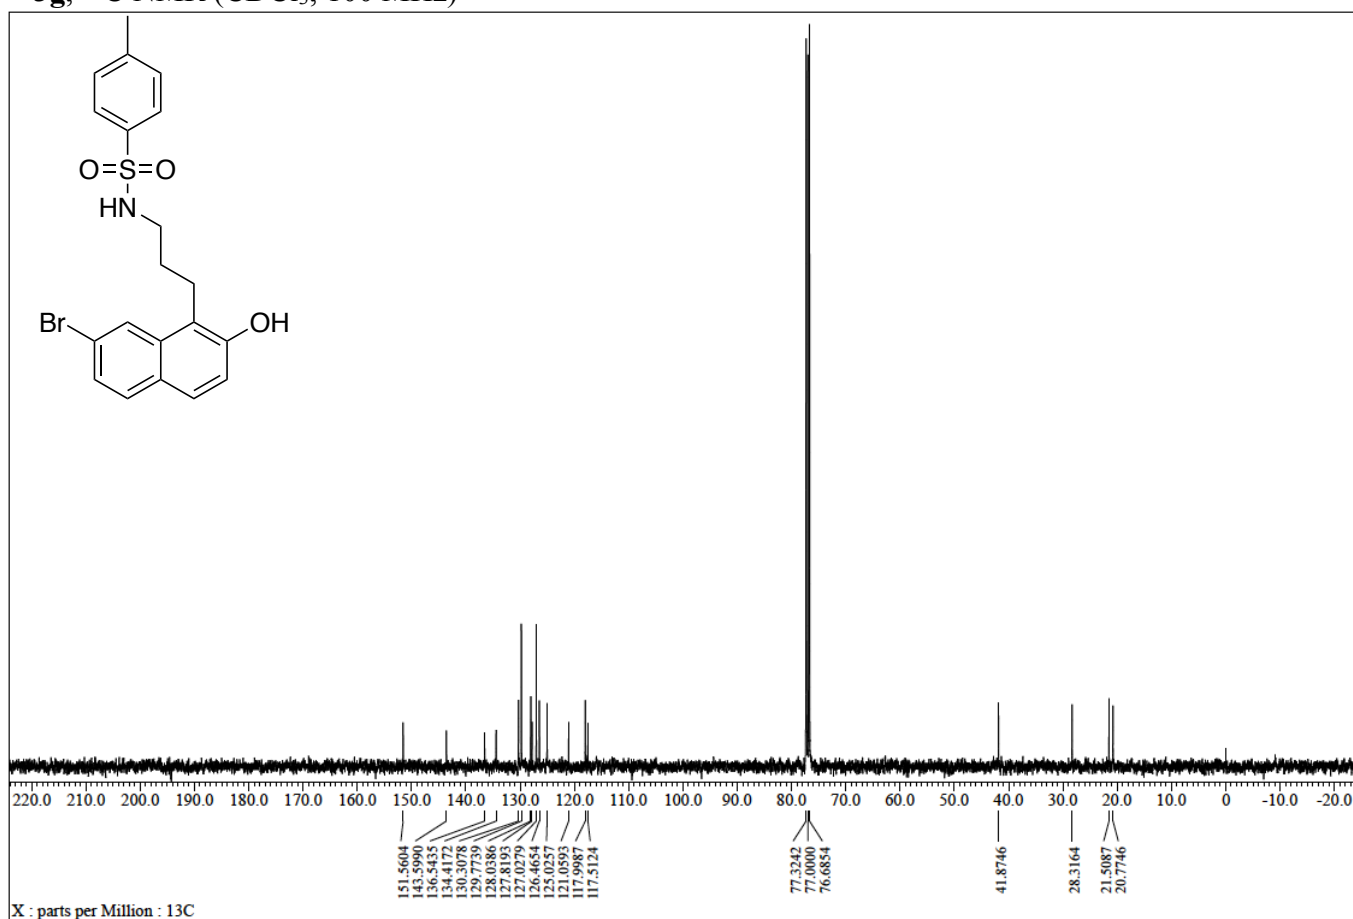

**3h**,  $^1\text{H}$  NMR ( $\text{CD}_3\text{CN}$ , 500 MHz)

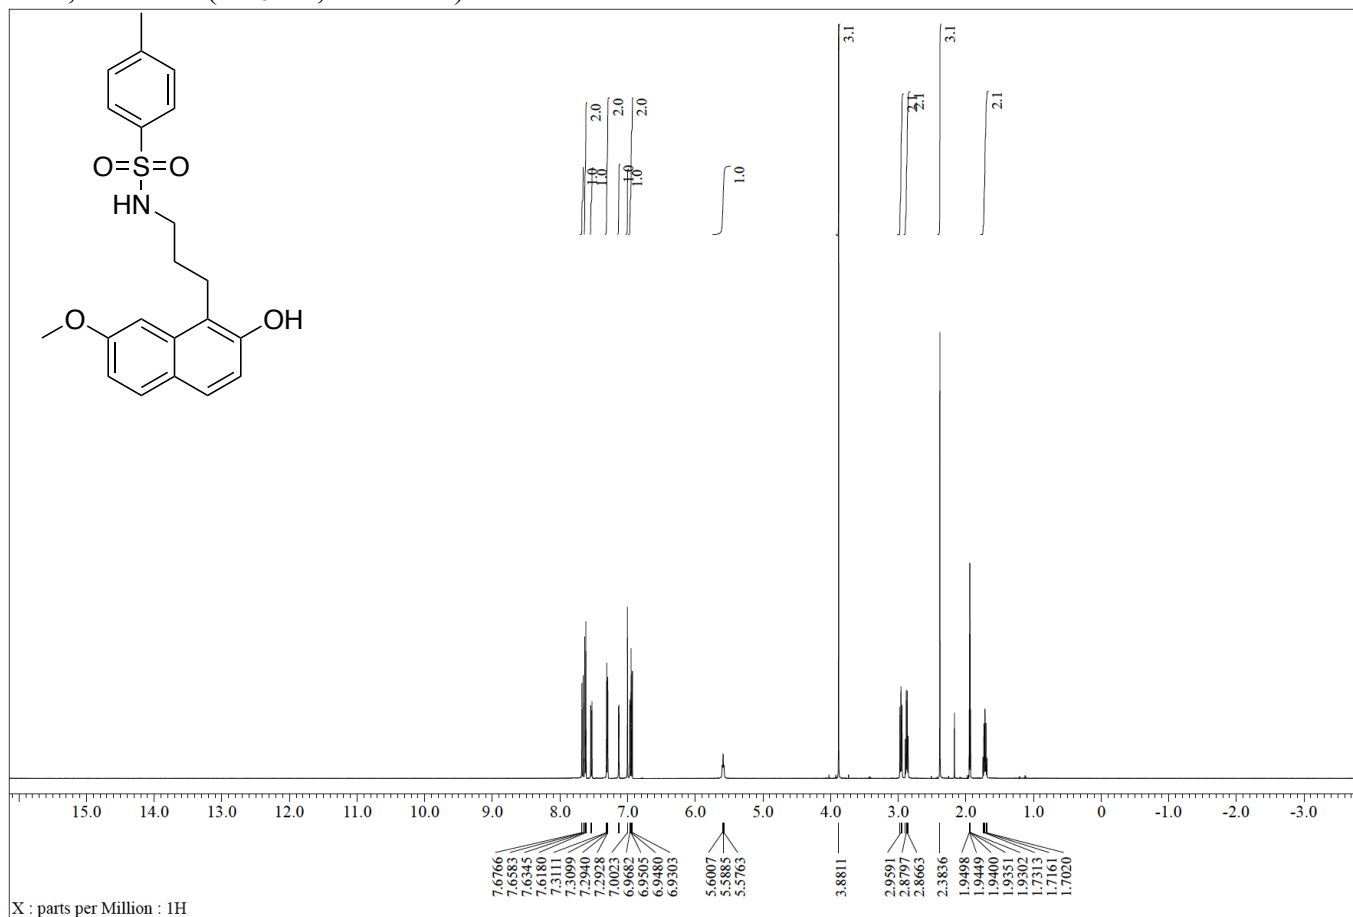

**3h**,  $^{13}\text{C}$  NMR ( $\text{CD}_3\text{CN}$ , 125 MHz)

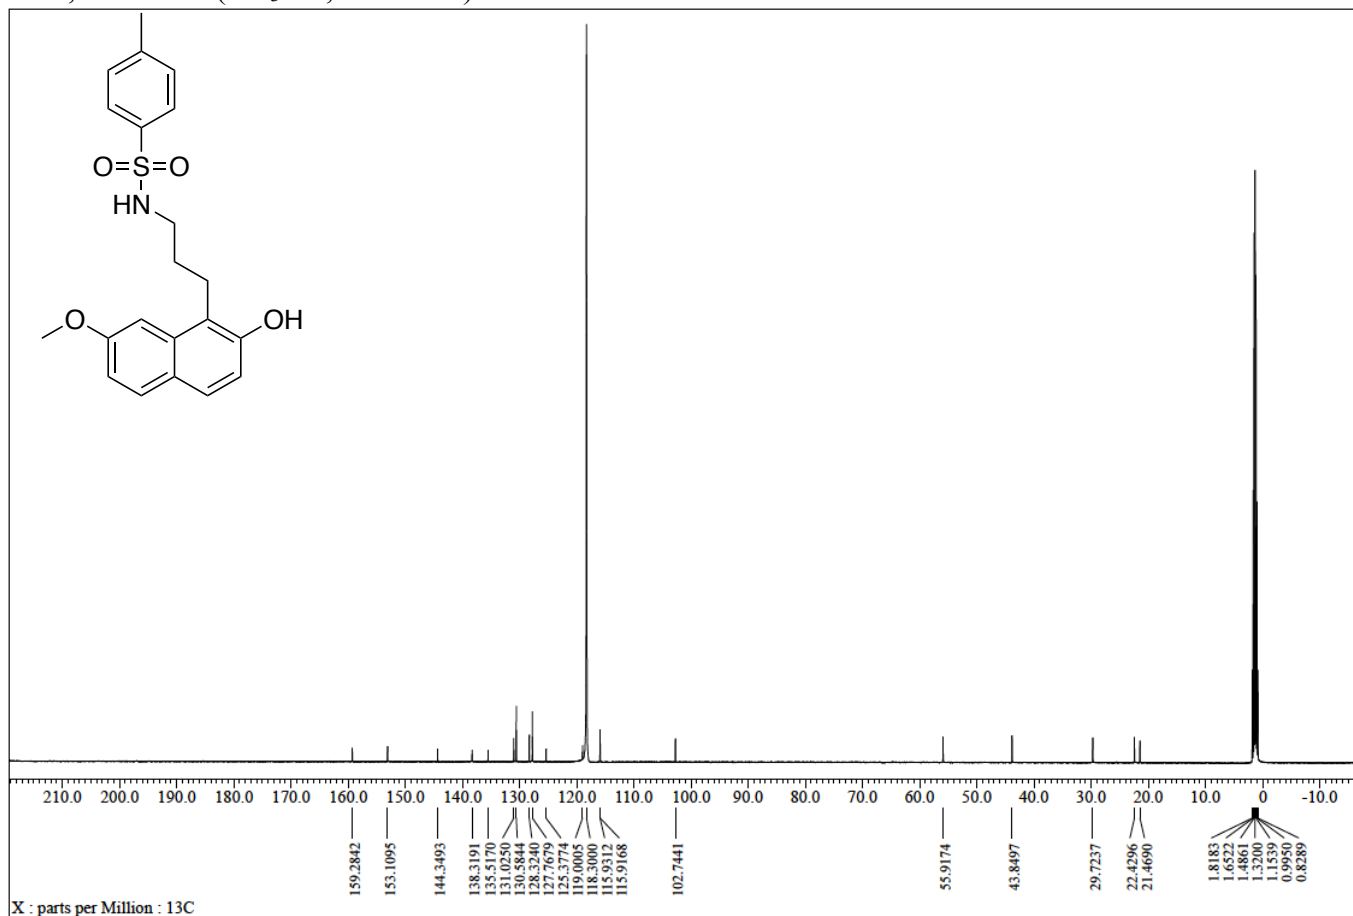



**3i**,  $^1\text{H}$  NMR ( $\text{CDCl}_3$ , 400 MHz)

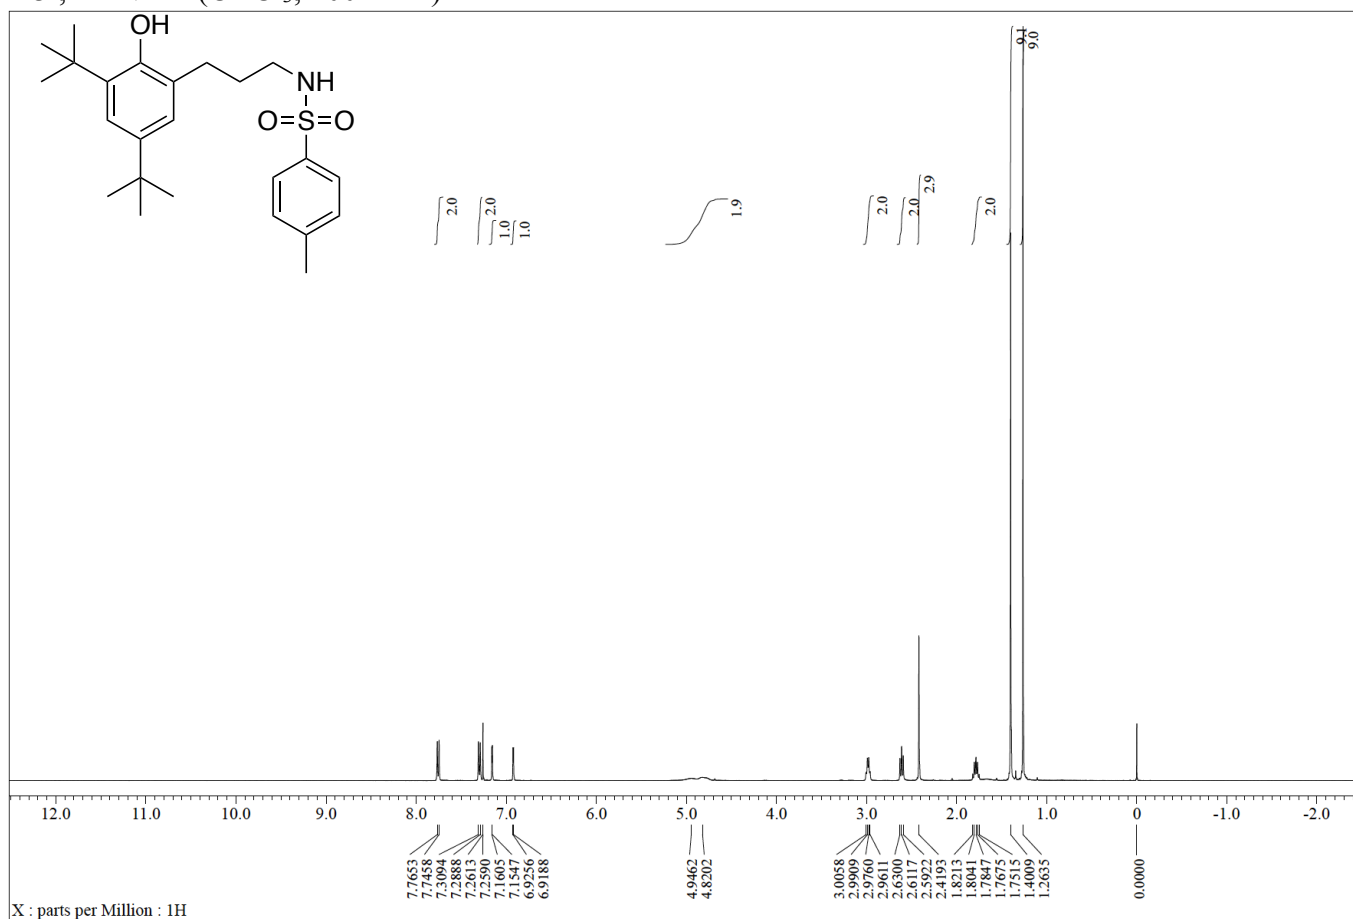

**3i**,  $^{13}\text{C}$  NMR ( $\text{CDCl}_3$ , 100 MHz)

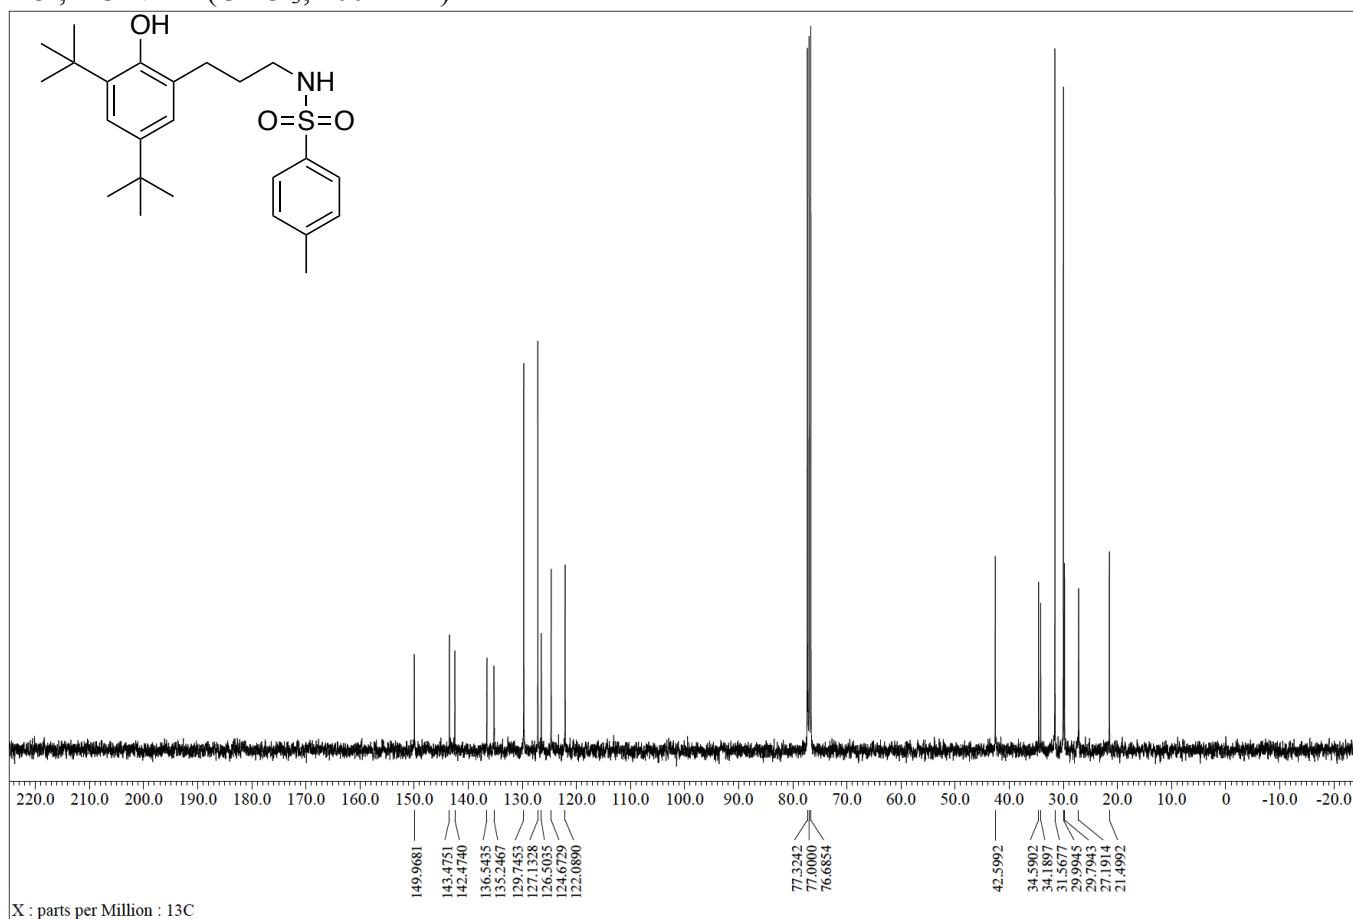

**3j**,  $^1\text{H}$  NMR ( $\text{CDCl}_3$ , 400 MHz)

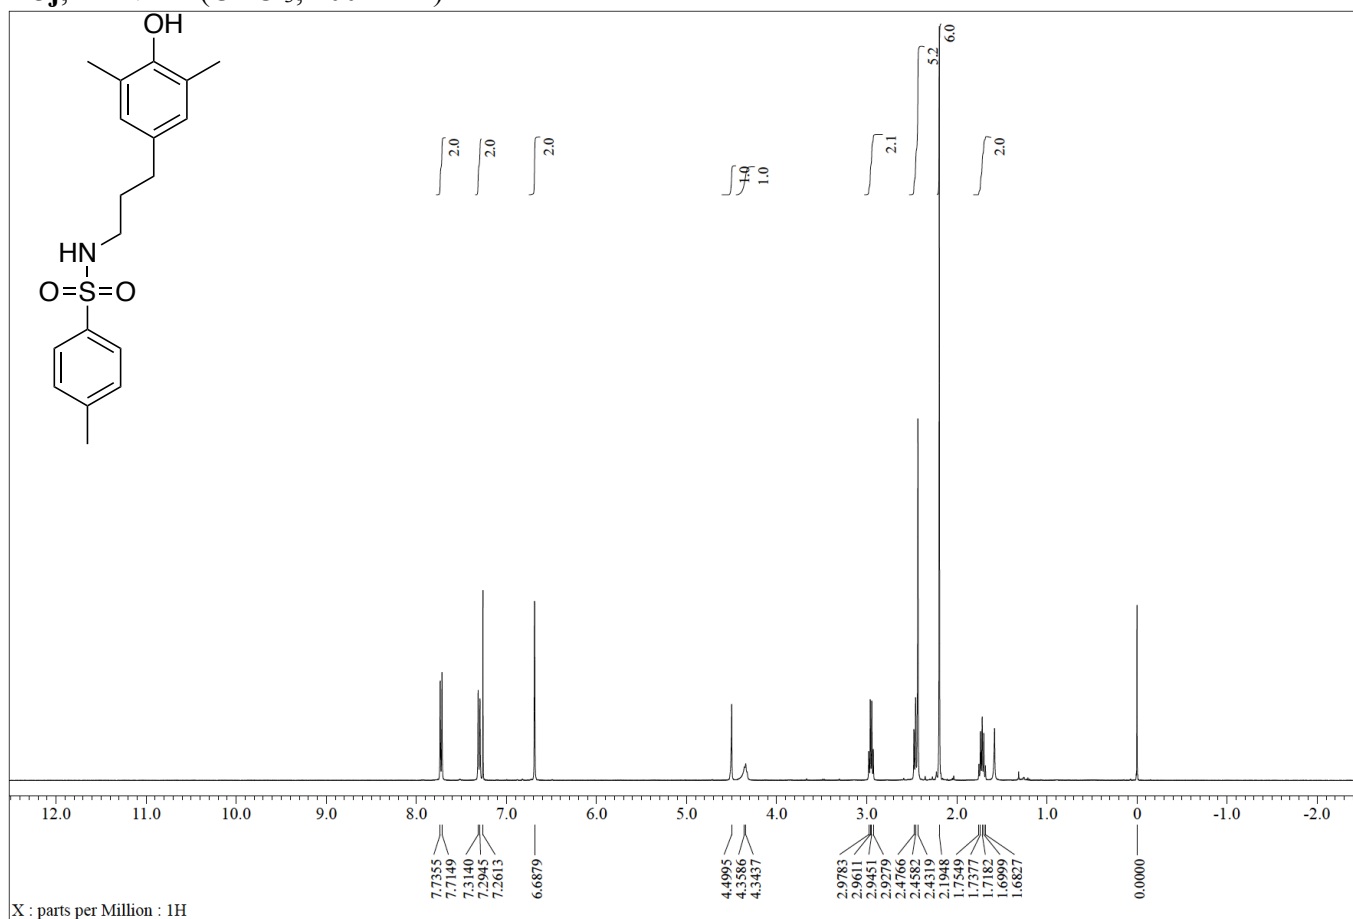

**3j**,  $^{13}\text{C}$  NMR ( $\text{CDCl}_3$ , 100 MHz)

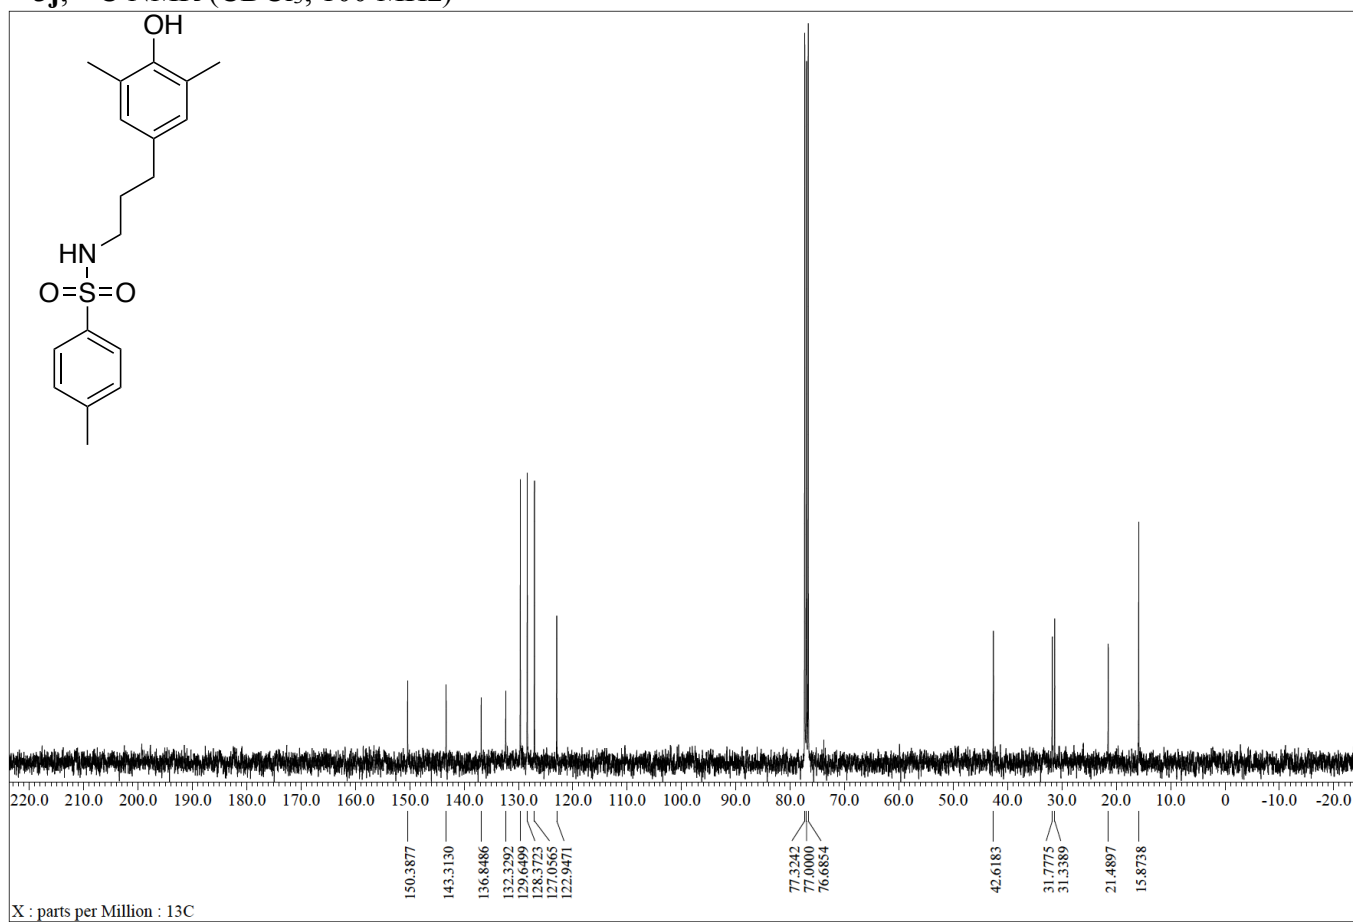

O=C1C(=C(C2=CC=CC=C2)C3=CC=CC=C3)C(=O)C1C4CCOCC4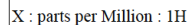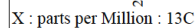

**2b**,  $^1\text{H}$  NMR ( $\text{CDCl}_3$ , 400 MHz)

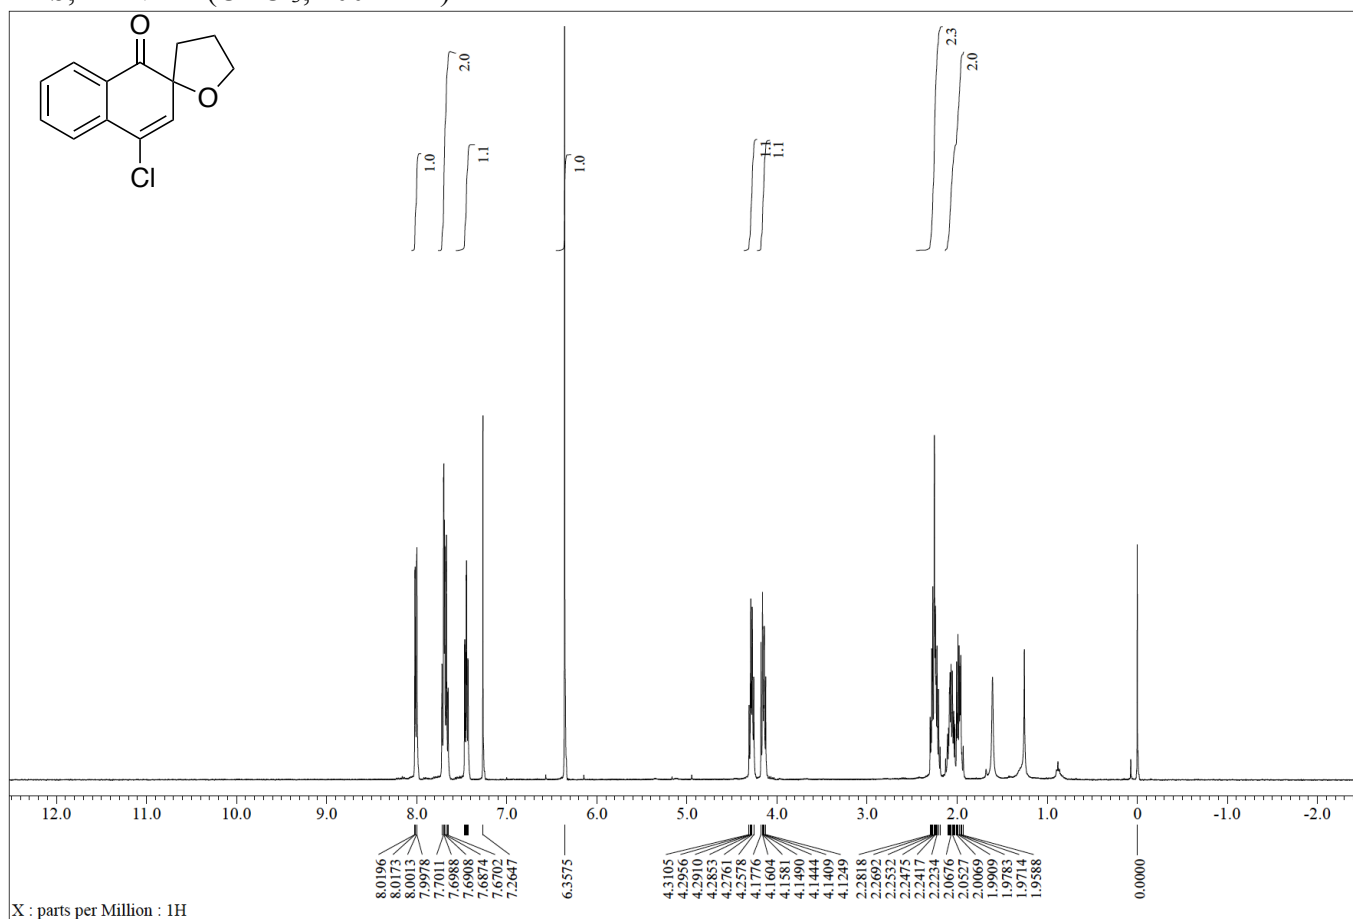

**2b**,  $^{13}\text{C}$  NMR ( $\text{CDCl}_3$ , 100 MHz)

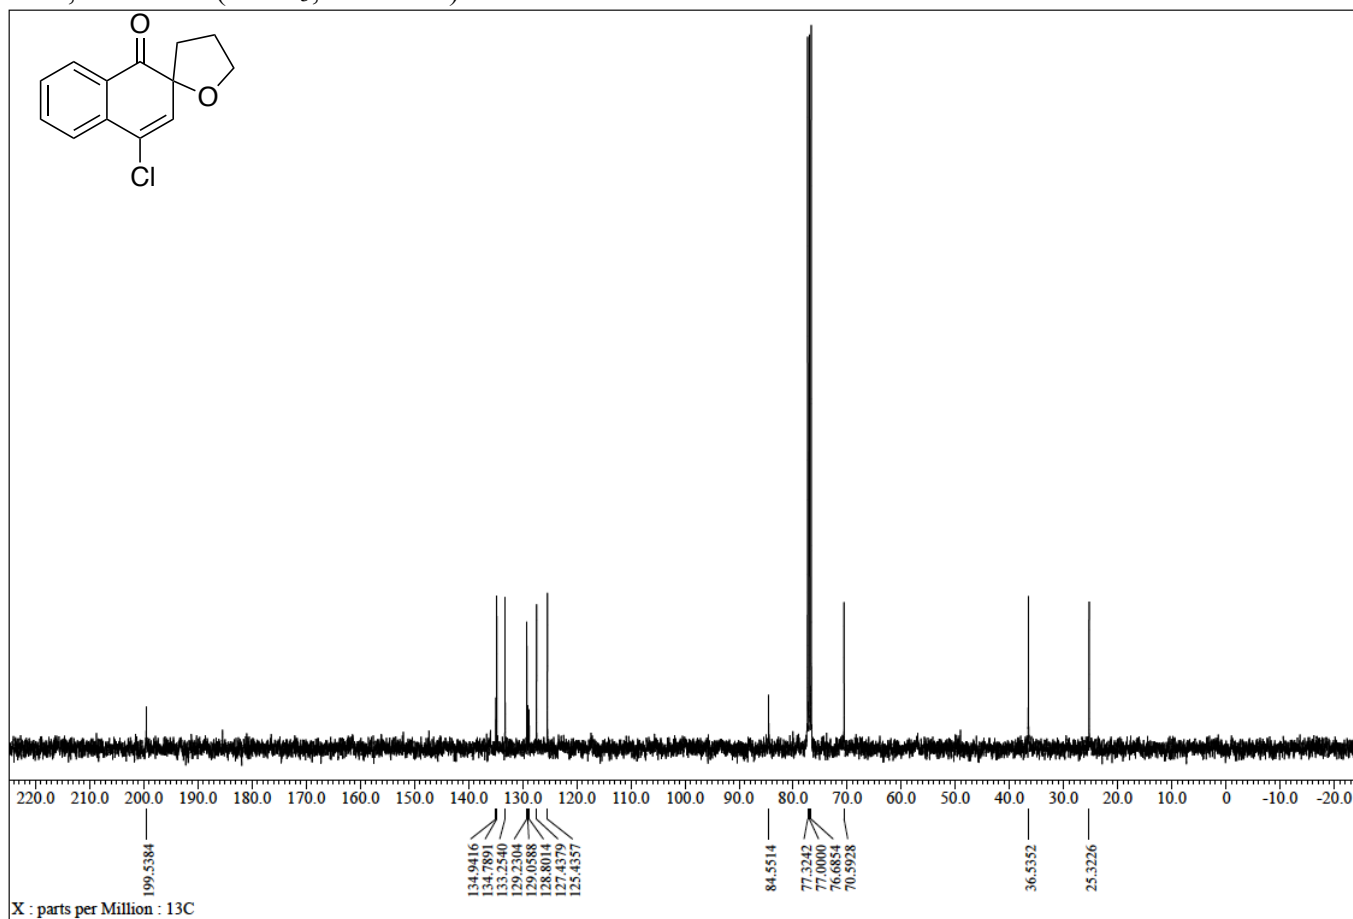

**2c**,  $^1\text{H}$  NMR ( $\text{CDCl}_3$ , 400 MHz)

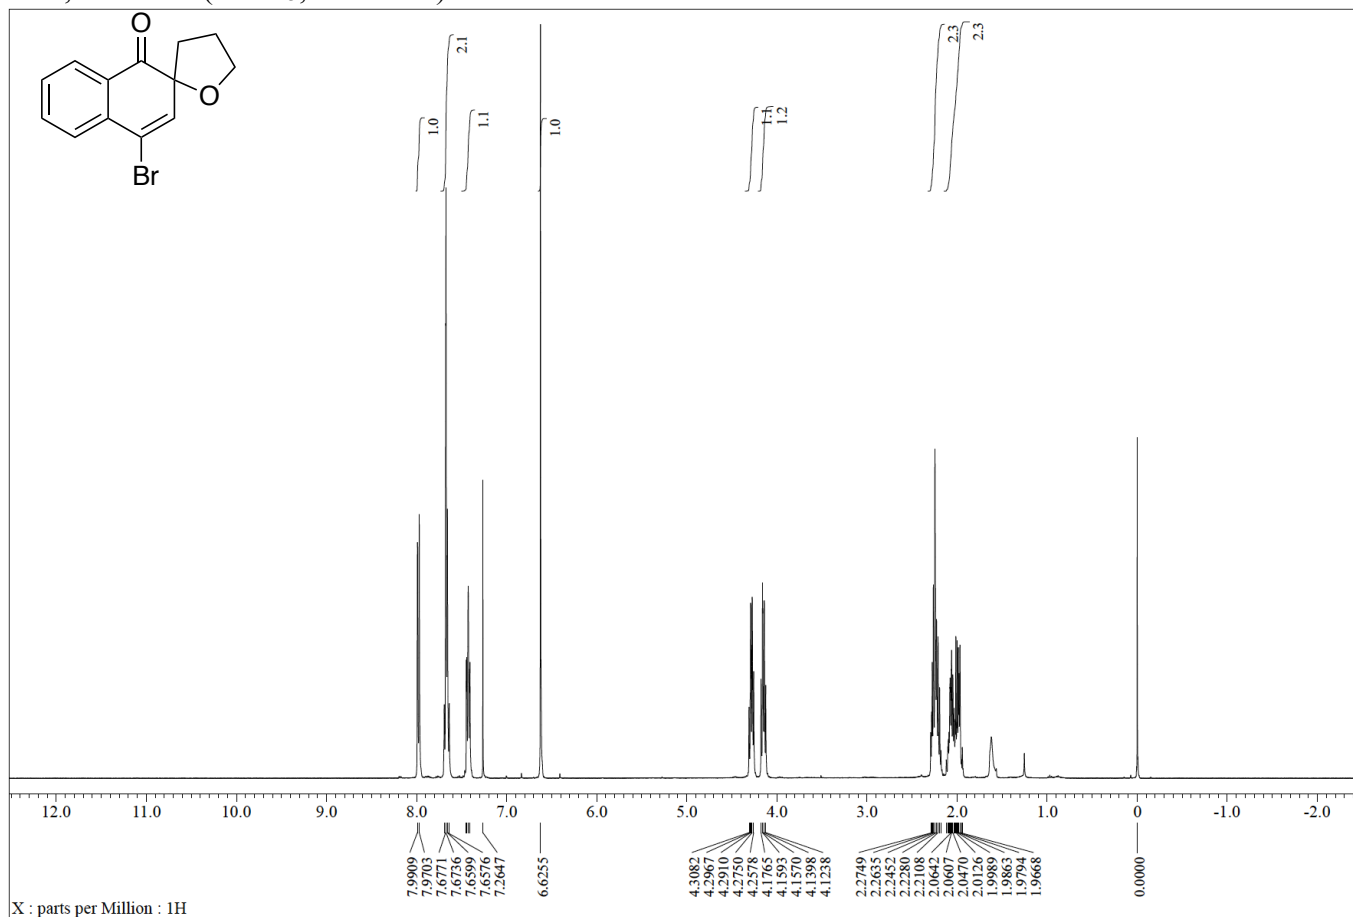

**2c**,  $^{13}\text{C}$  NMR ( $\text{CDCl}_3$ , 100 MHz)

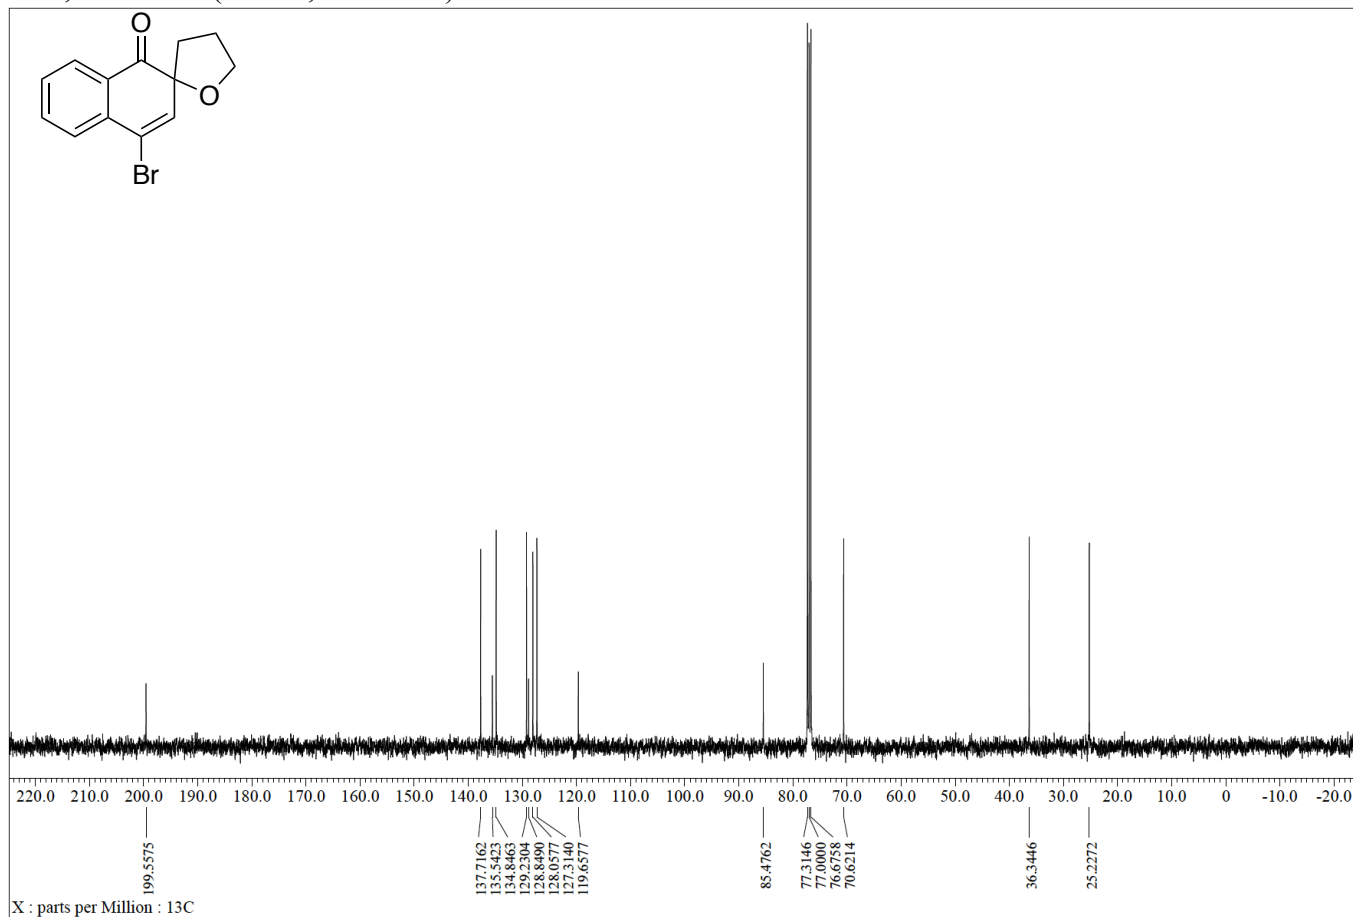

**2d**,  $^1\text{H}$  NMR ( $\text{CDCl}_3$ , 400 MHz)

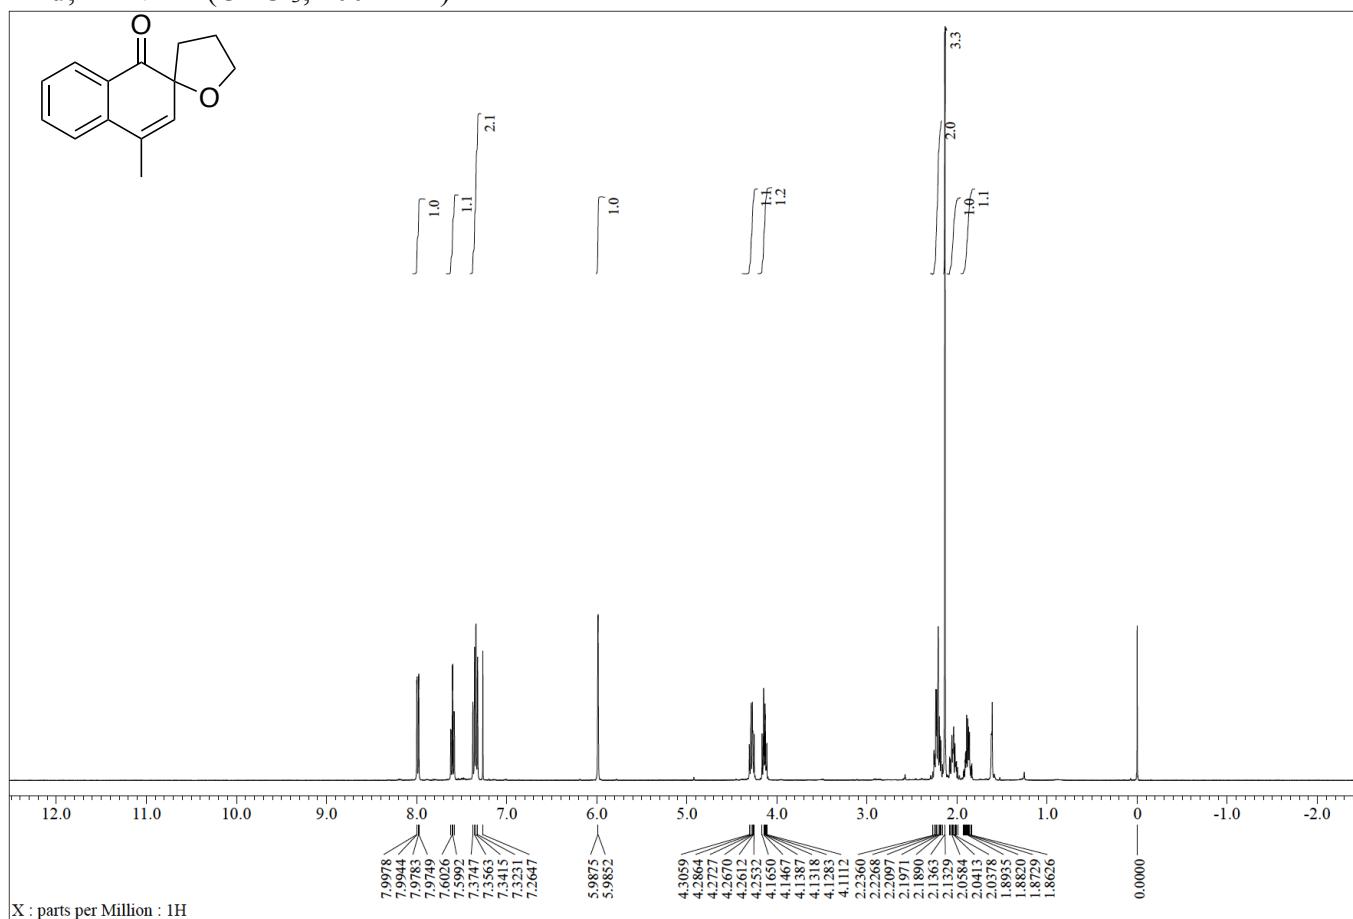

**2d**,  $^{13}\text{C}$  NMR ( $\text{CDCl}_3$ , 100 MHz)

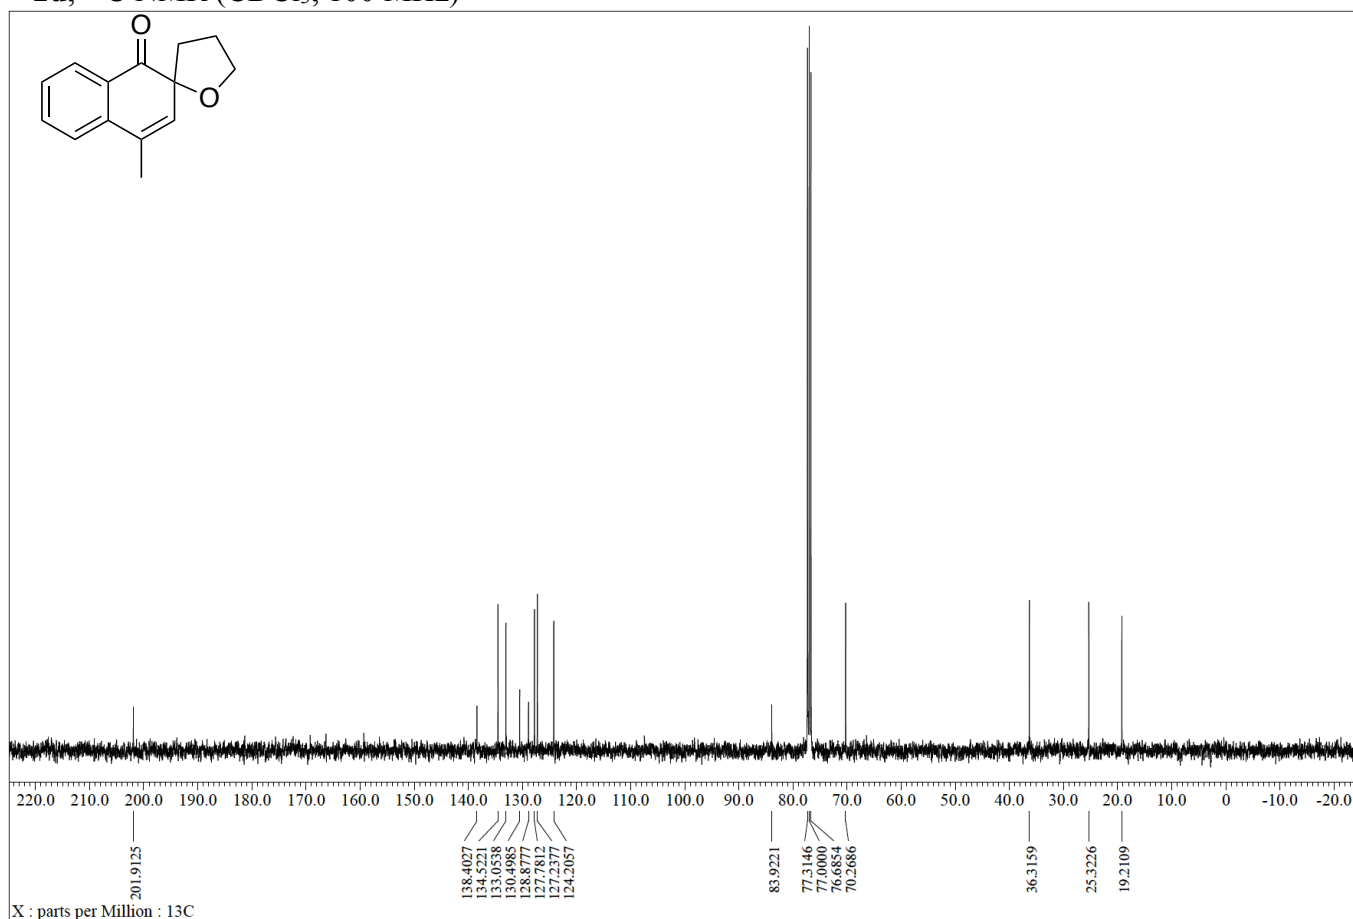

**2e**,  $^1\text{H}$  NMR ( $\text{CDCl}_3$ , 400 MHz)

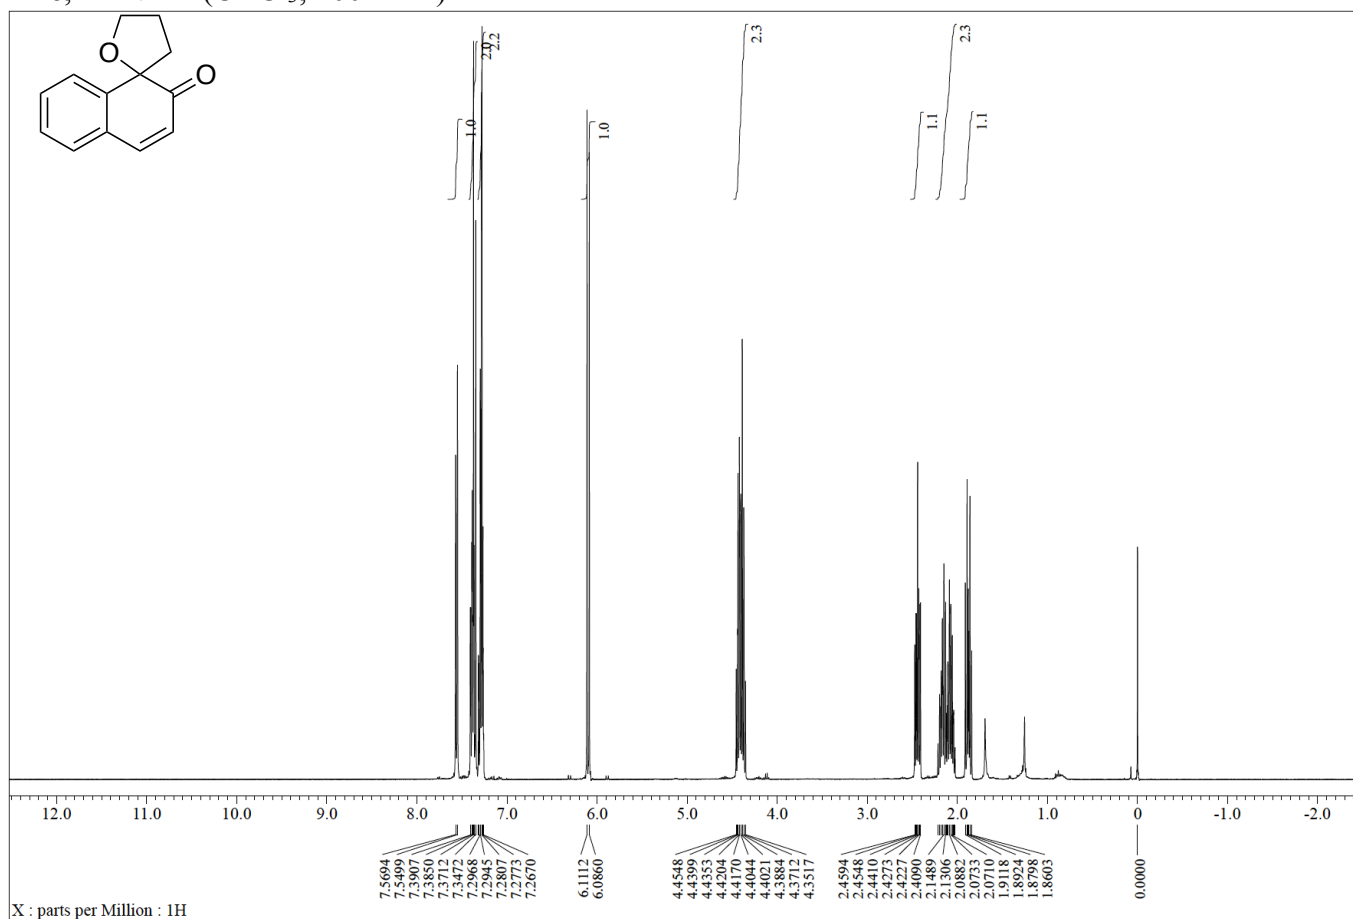

**2e**,  $^{13}\text{C}$  NMR ( $\text{CDCl}_3$ , 100 MHz)

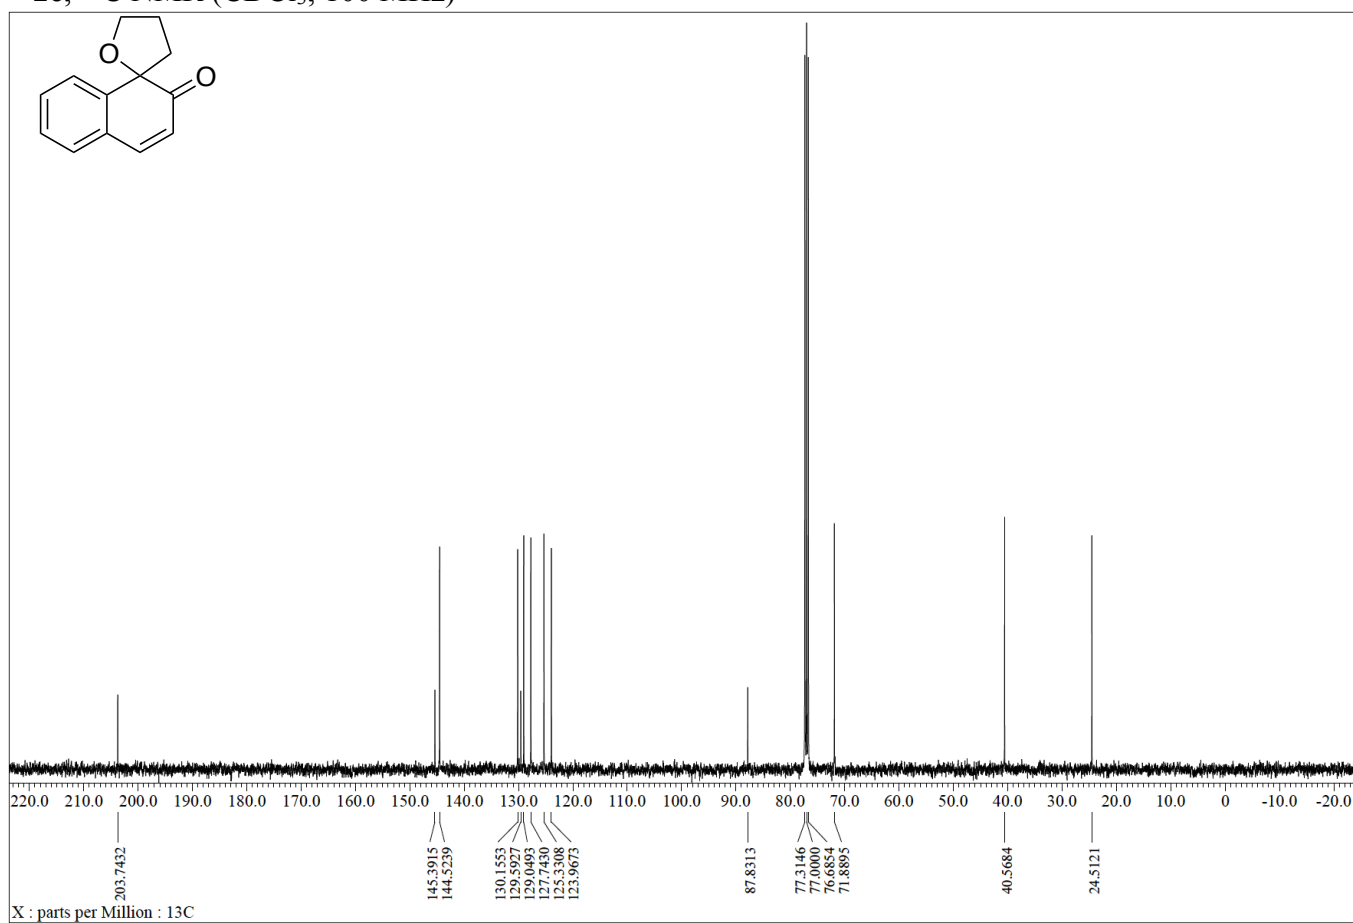

**2f**,  $^1\text{H}$  NMR ( $\text{CDCl}_3$ , 400 MHz)

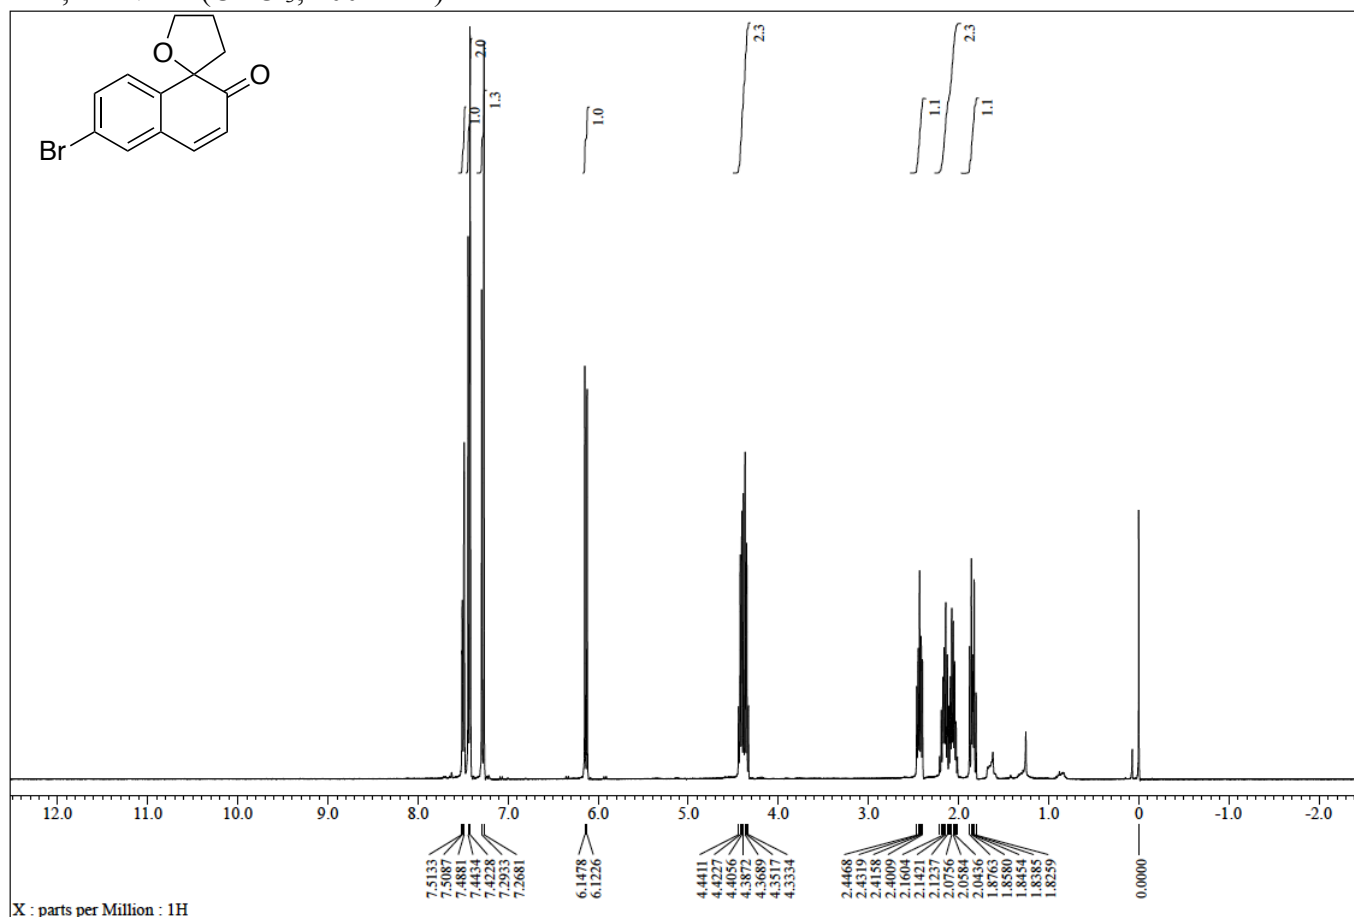

**2f**,  $^{13}\text{C}$  NMR ( $\text{CDCl}_3$ , 100 MHz)

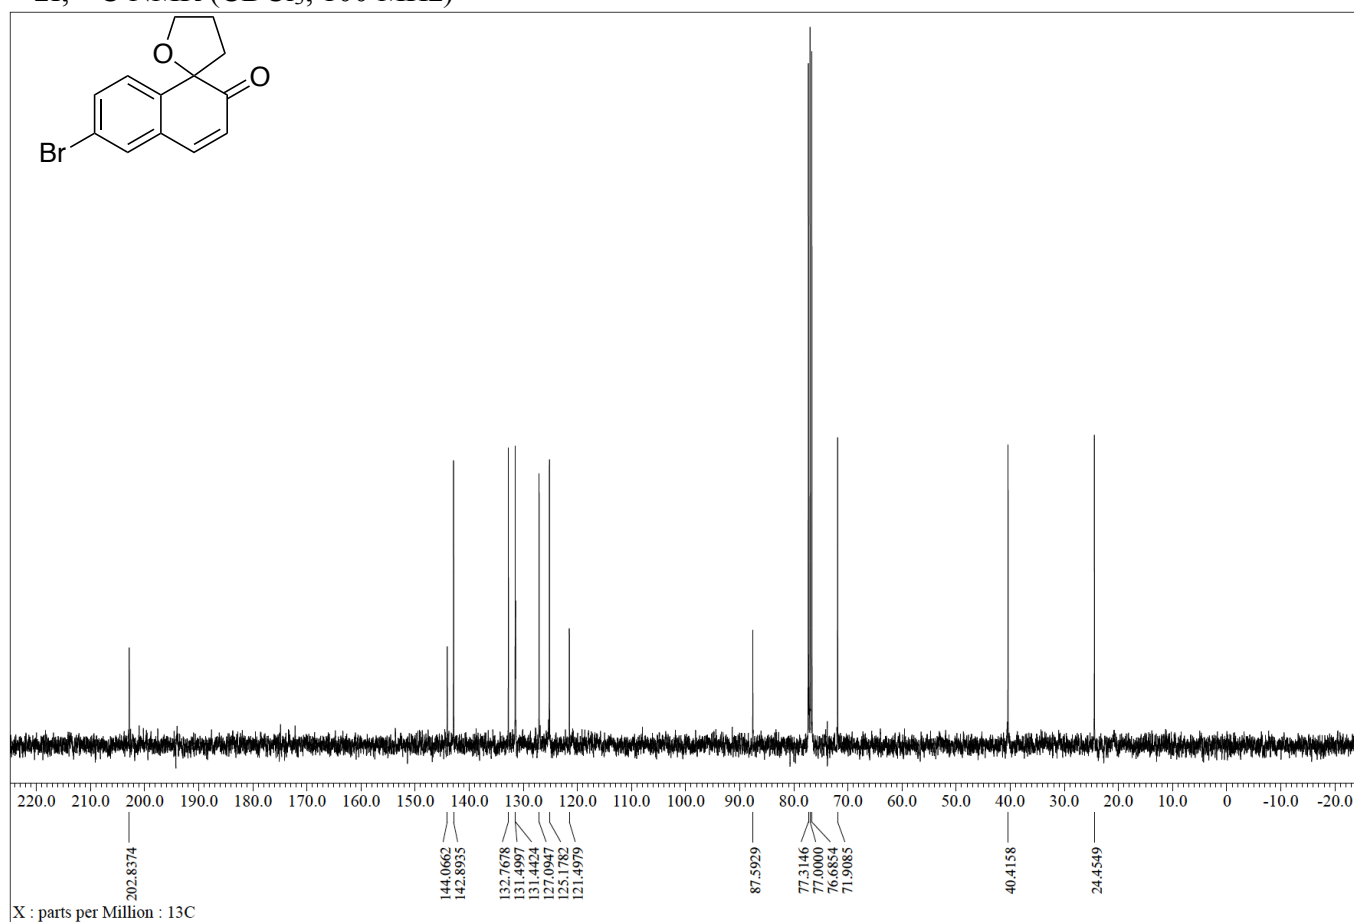



**2g**,  $^1\text{H}$  NMR ( $\text{CDCl}_3$ , 400 MHz)

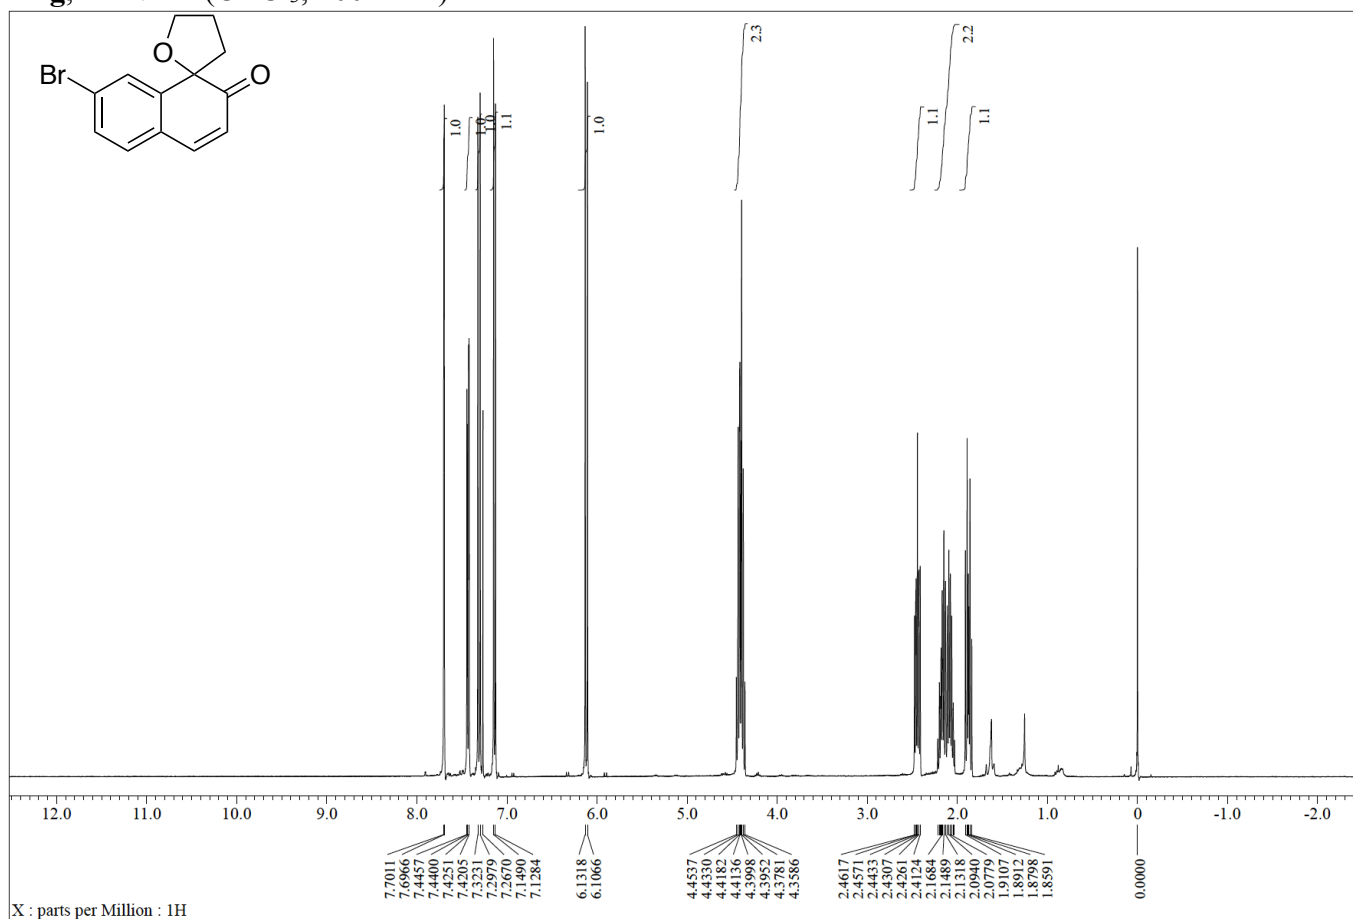

**2g**,  $^{13}\text{C}$  NMR ( $\text{CDCl}_3$ , 100 MHz)

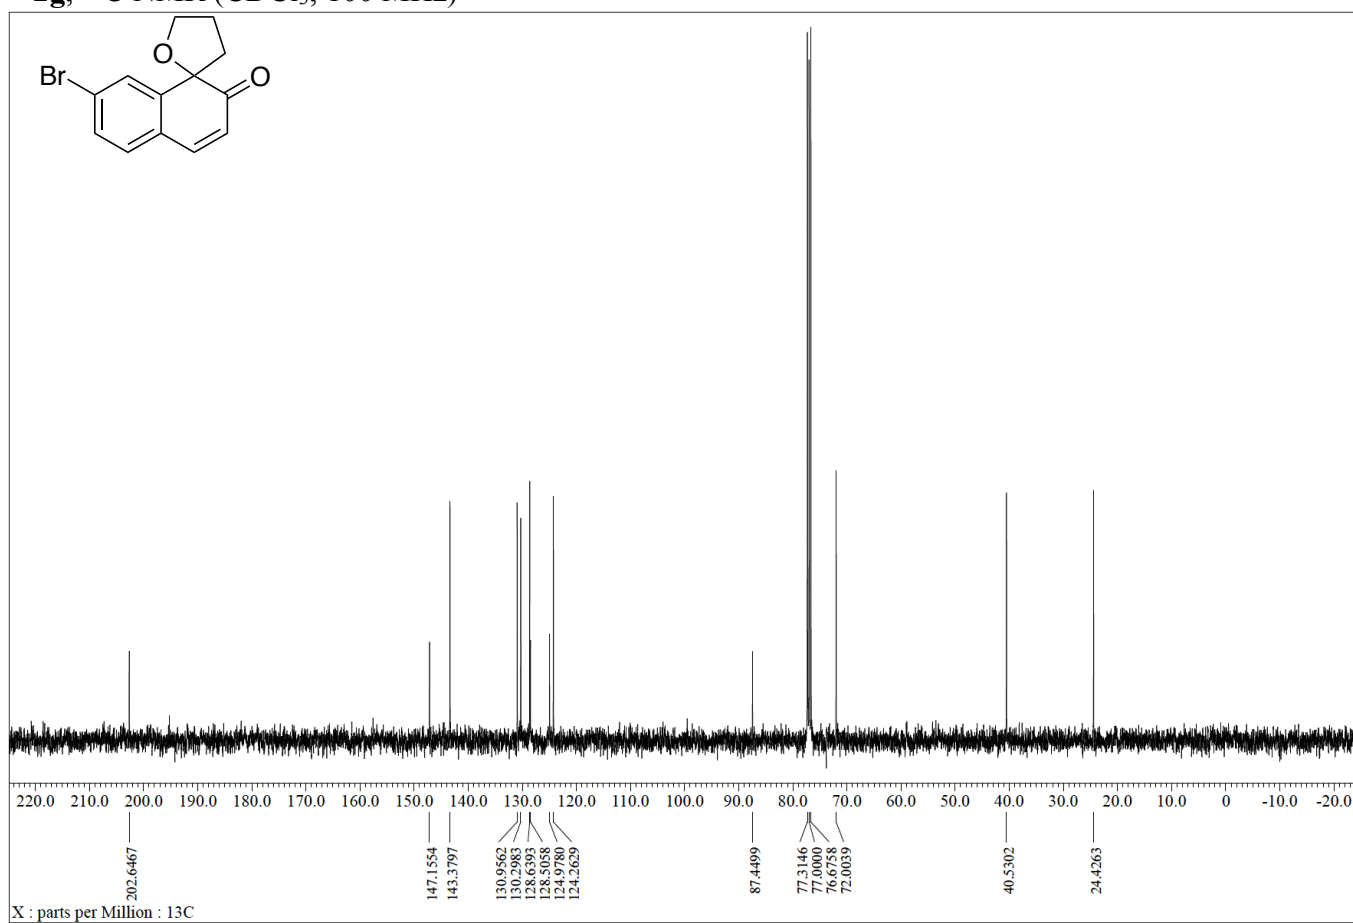

**2h**,  $^1\text{H}$  NMR ( $\text{CDCl}_3$ , 400 MHz)

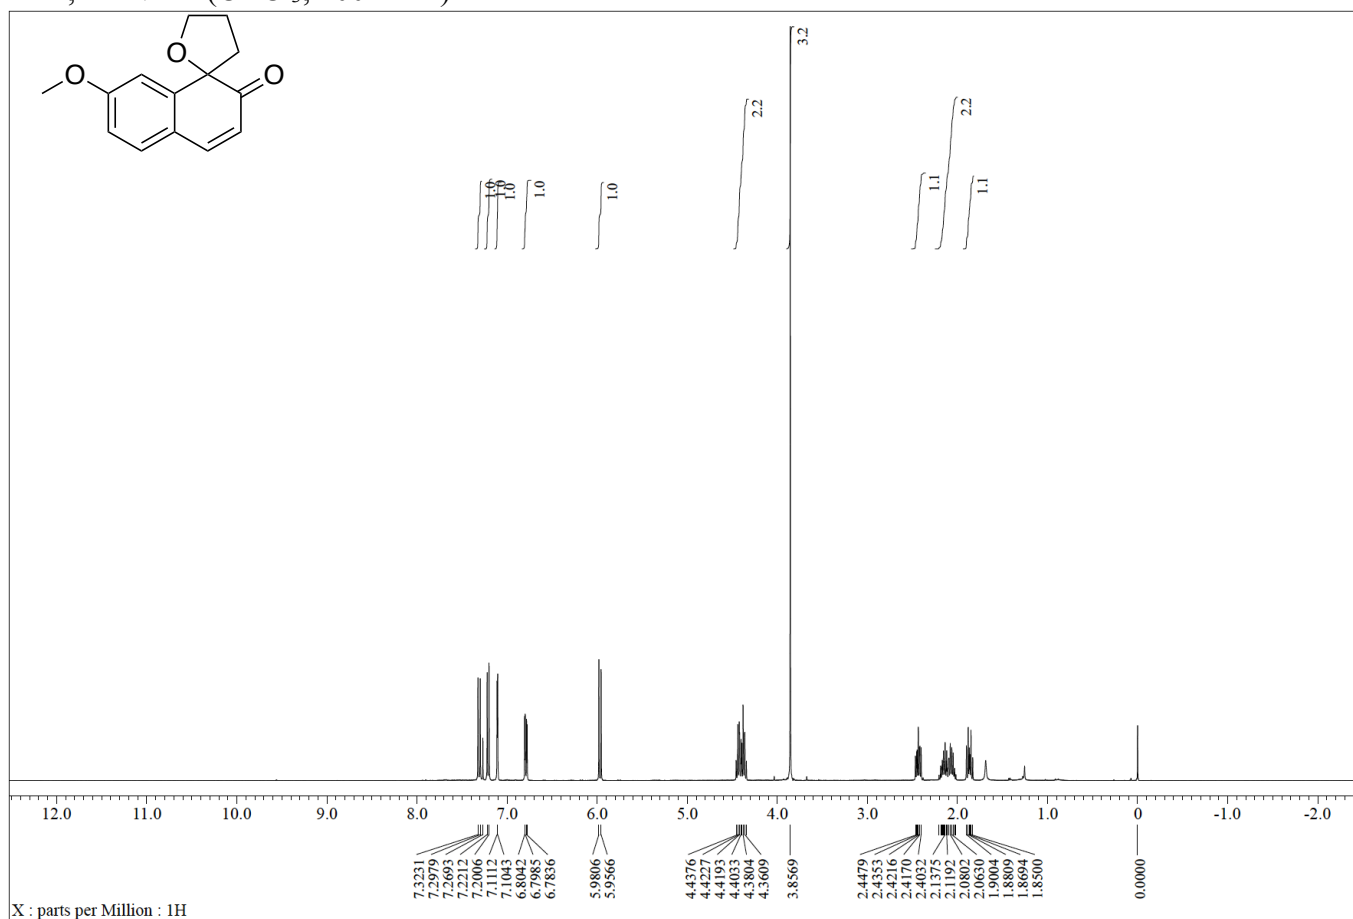

**2h**,  $^{13}\text{C}$  NMR ( $\text{CDCl}_3$ , 100 MHz)

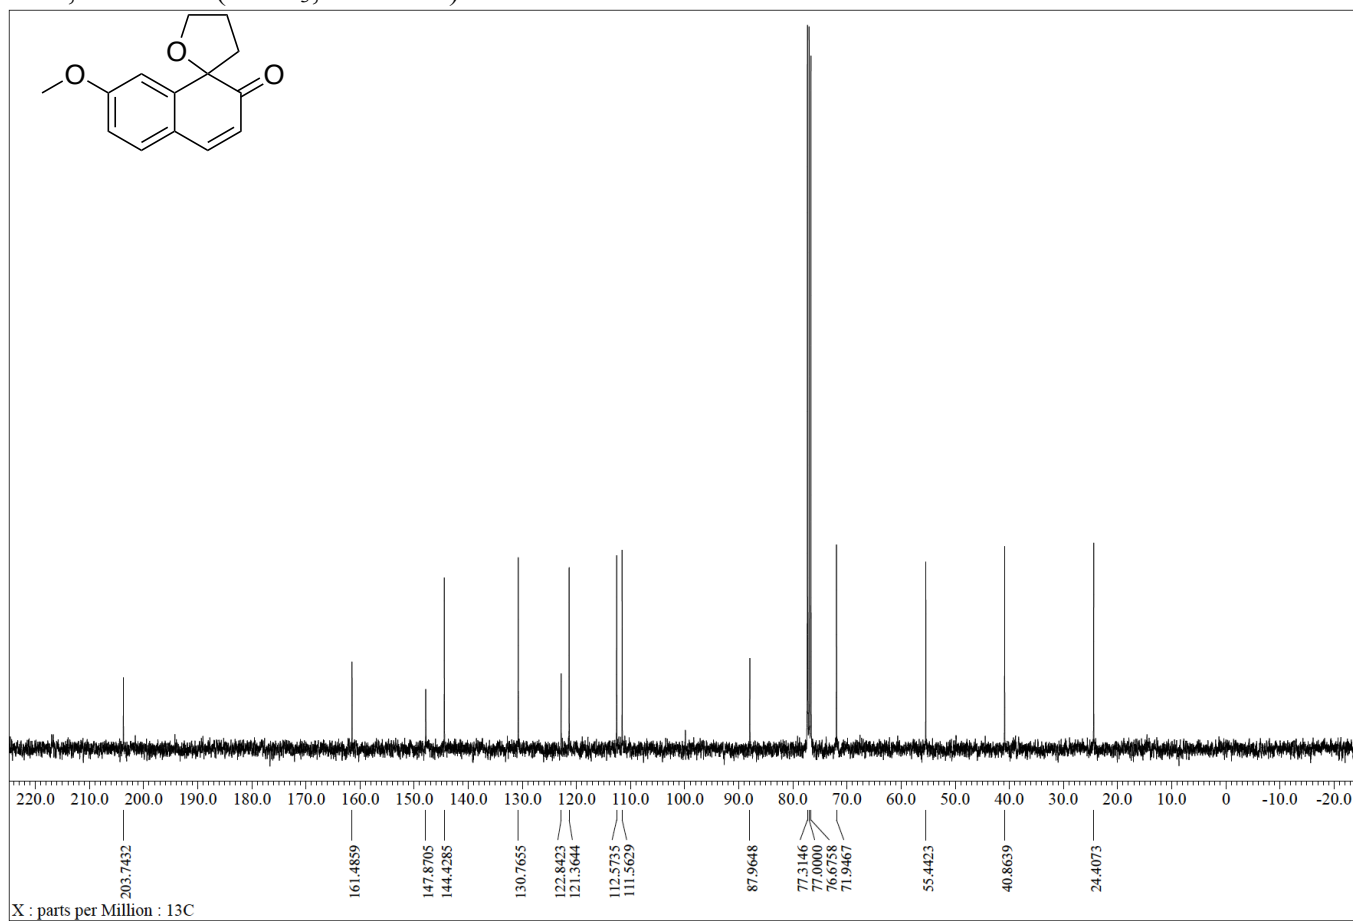

**2i**,  $^1\text{H}$  NMR ( $\text{CDCl}_3$ , 400 MHz)

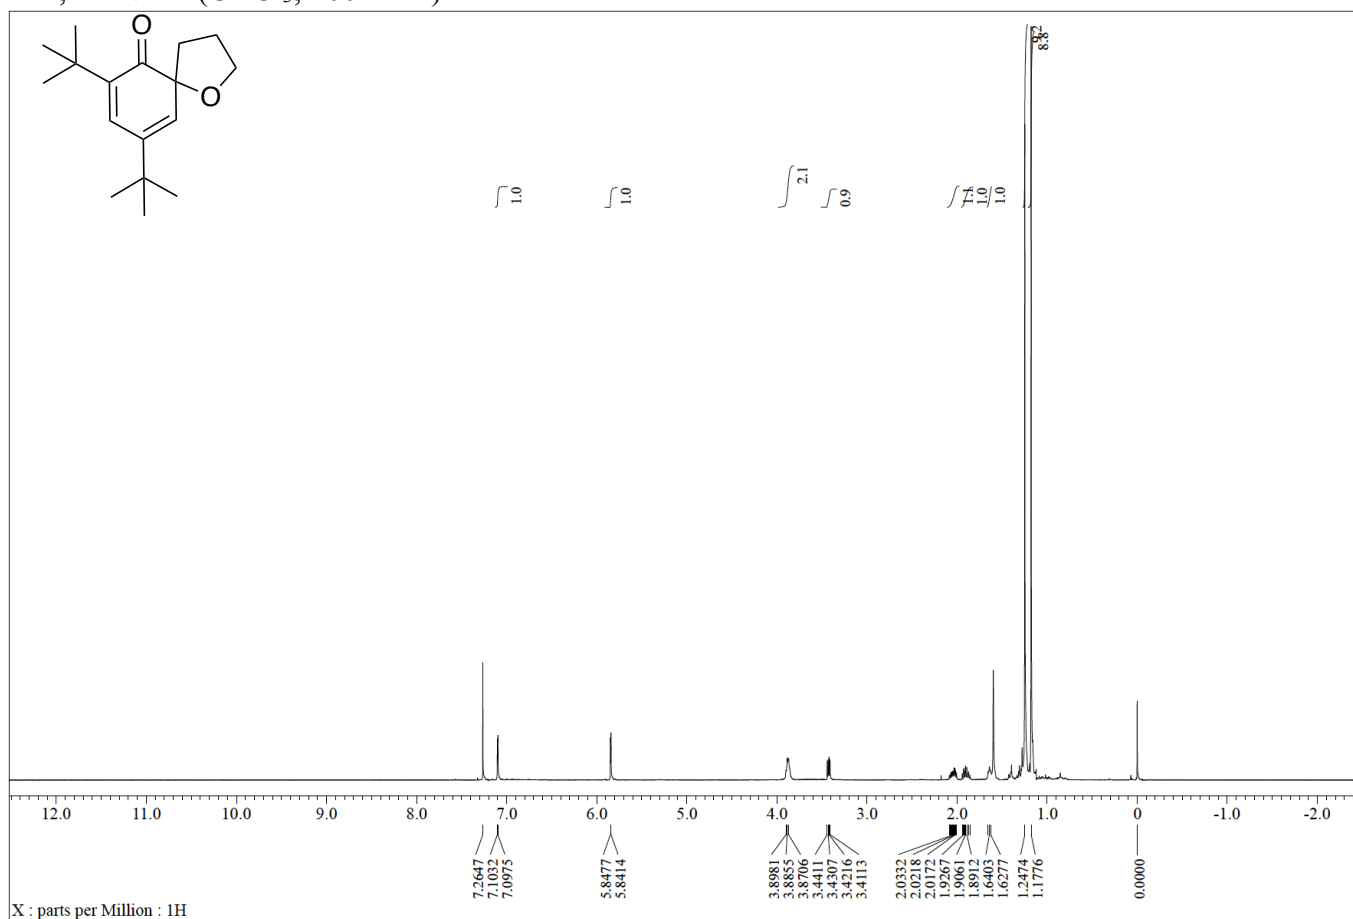

**2i**,  $^{13}\text{C}$  NMR ( $\text{CDCl}_3$ , 100 MHz)

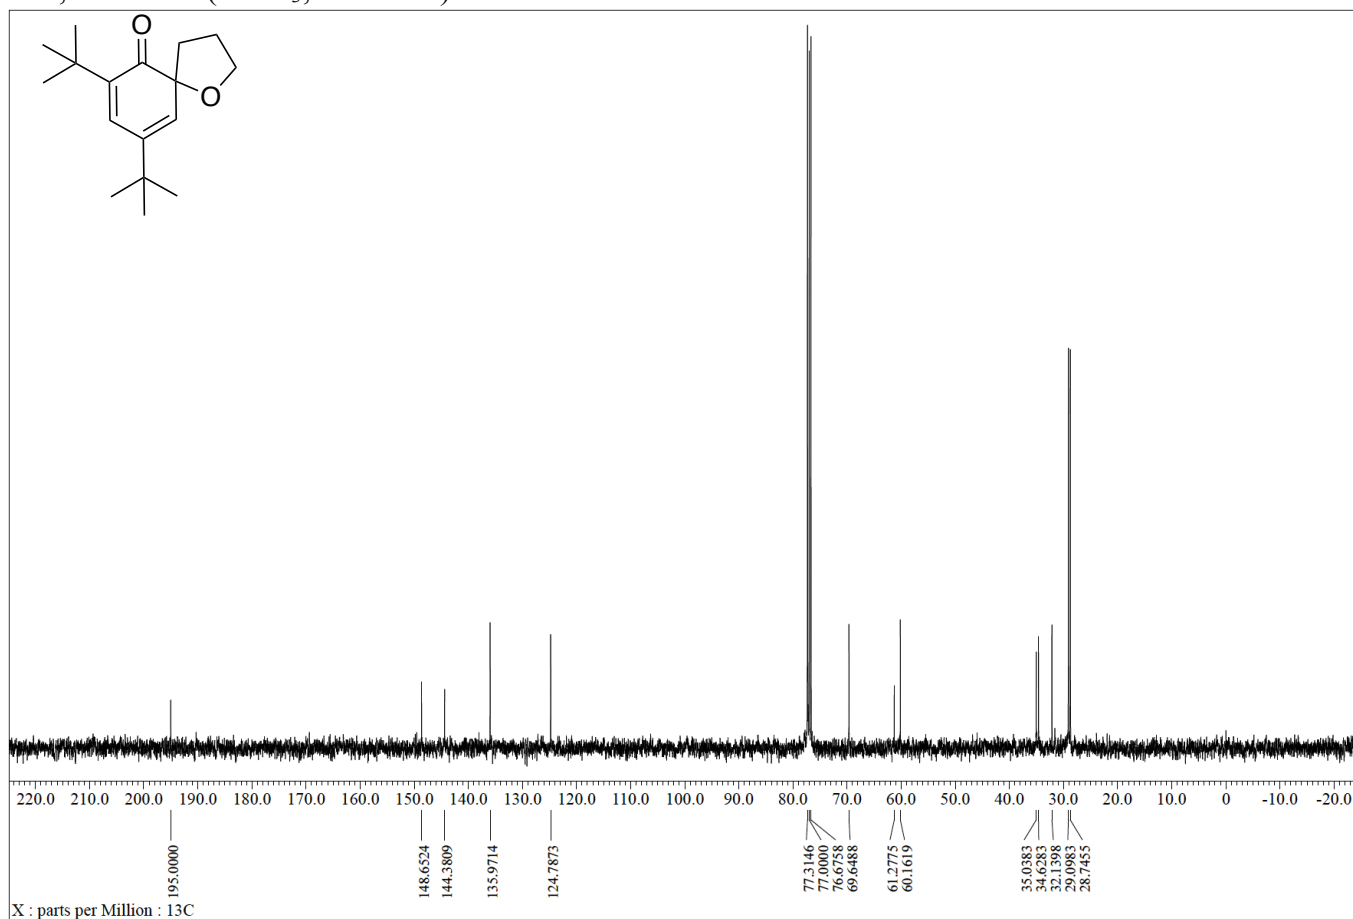

**2j**,  $^1\text{H}$  NMR ( $\text{CDCl}_3$ , 400 MHz)

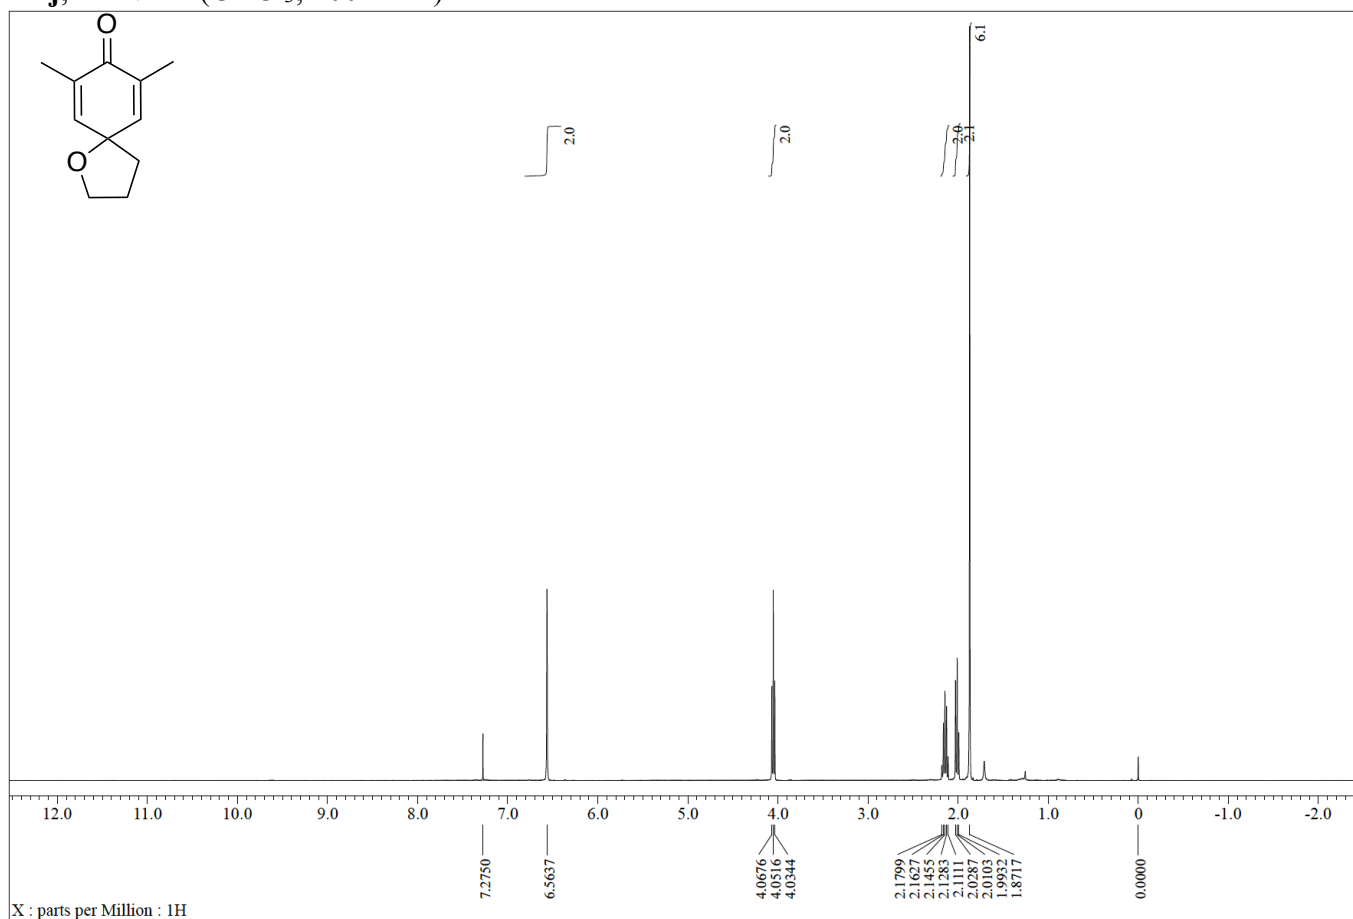

**2j**,  $^{13}\text{C}$  NMR ( $\text{CDCl}_3$ , 100 MHz)

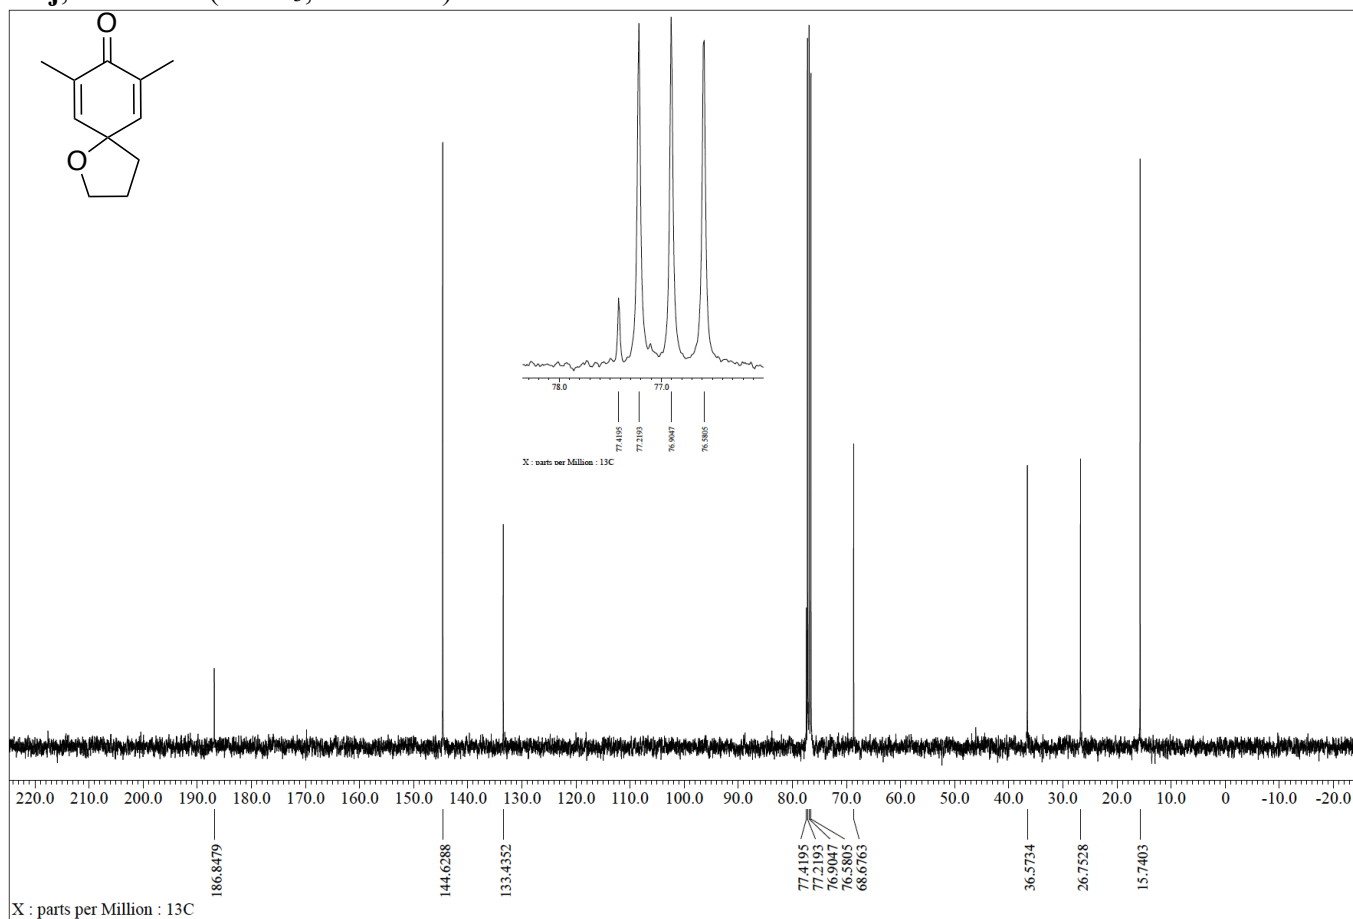

**2l (major),  $^1\text{H}$  NMR (CDCl<sub>3</sub>, 400 MHz)**

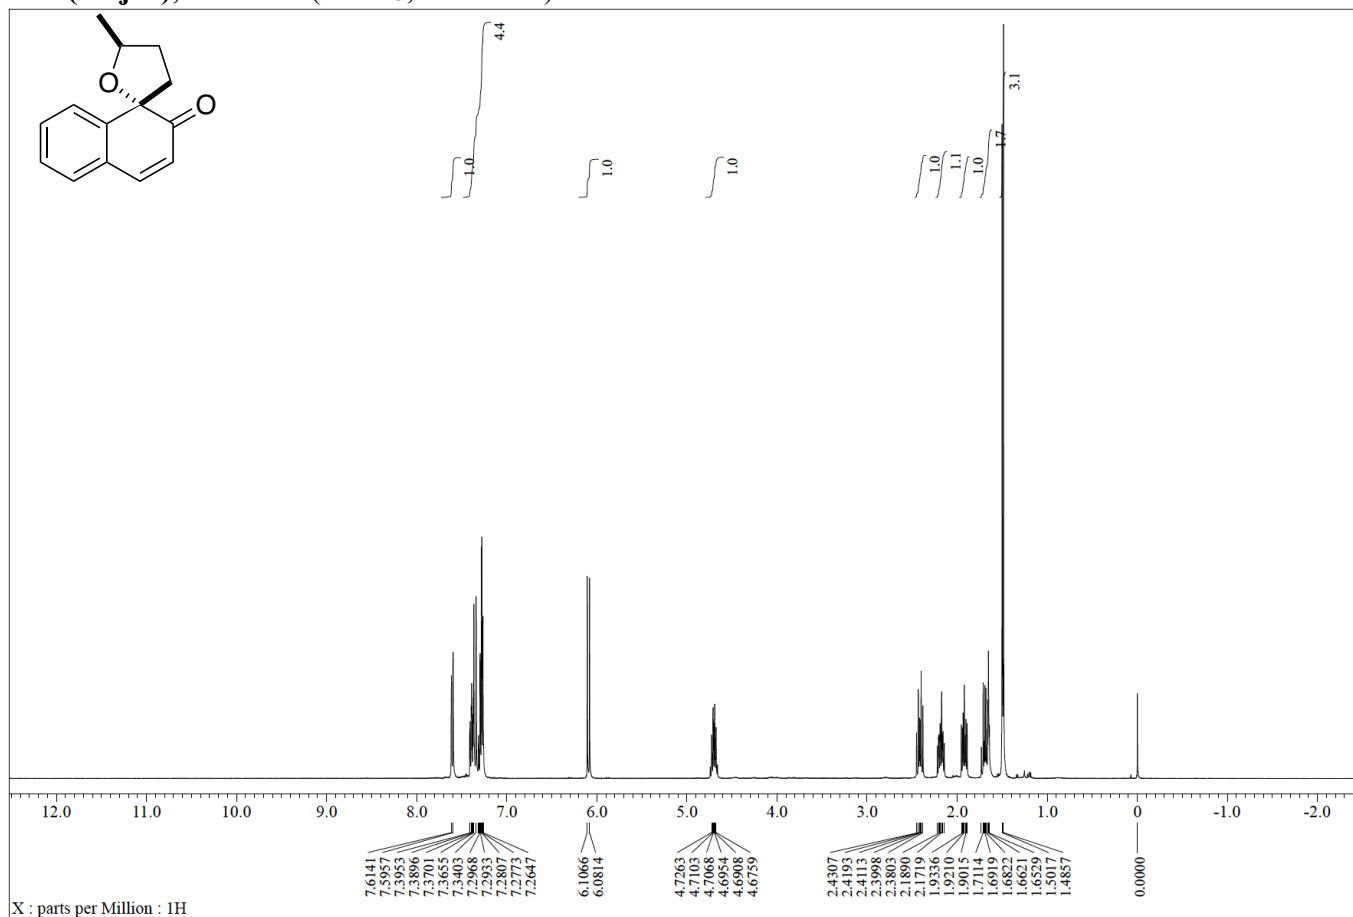

**2l (major),  $^{13}\text{C}$  NMR (CDCl<sub>3</sub>, 100 MHz)**

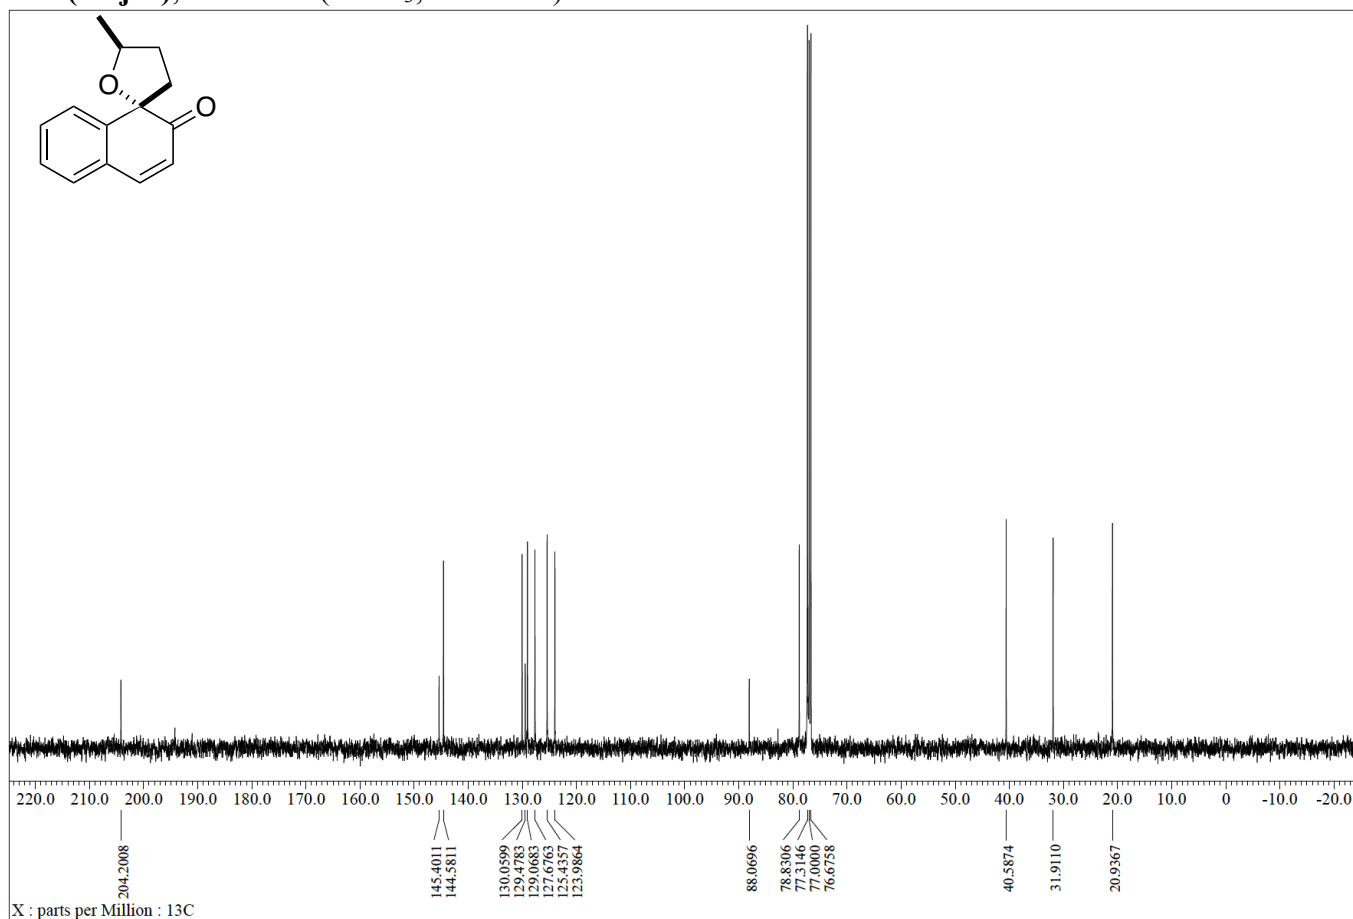

**2l (minor),  $^1\text{H}$  NMR ( $\text{CDCl}_3$ , 500 MHz)**

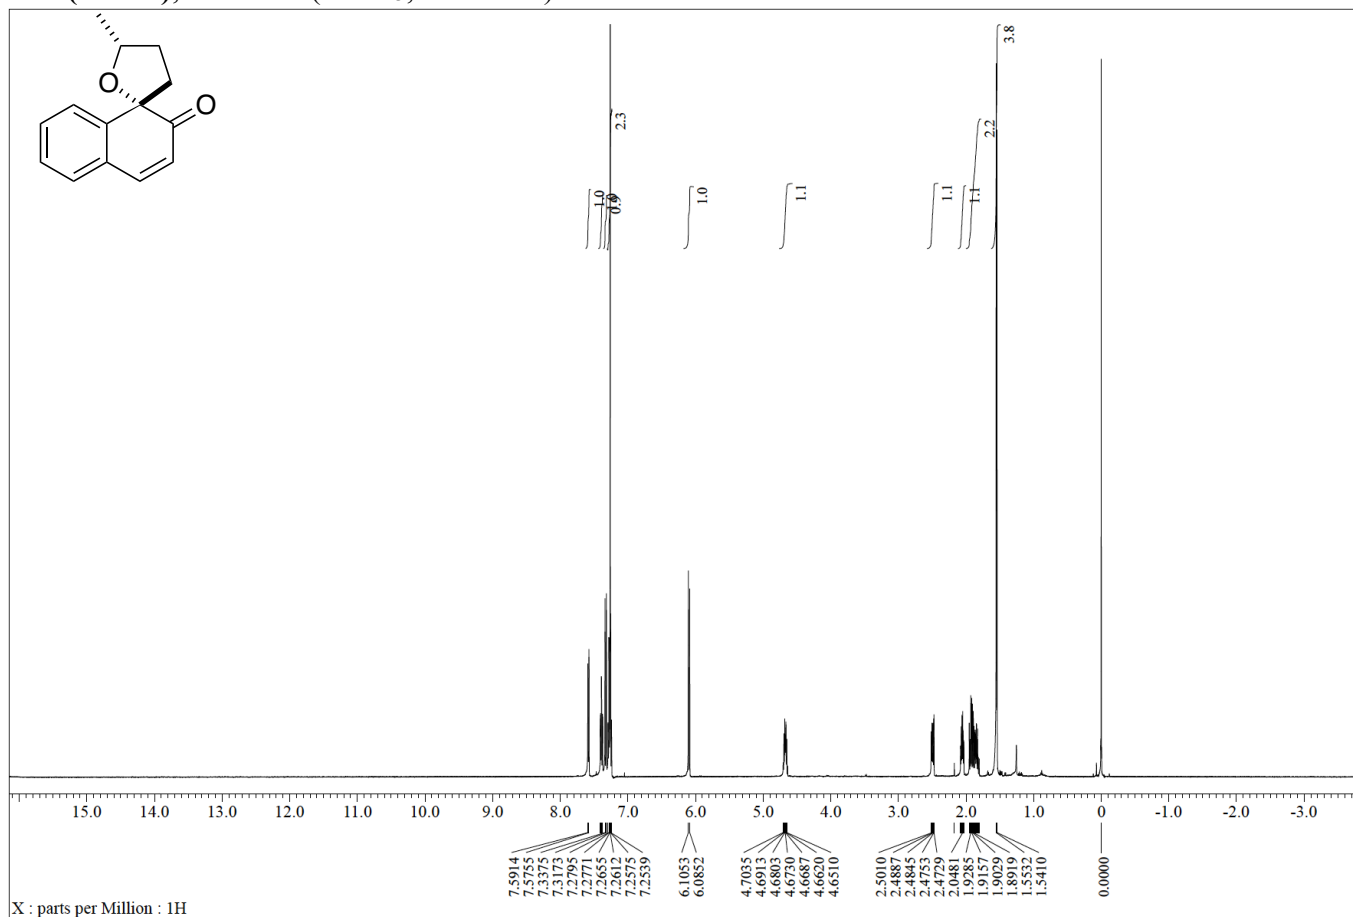

**2l (minor),  $^{13}\text{C}$  NMR ( $\text{CDCl}_3$ , 125 MHz)**

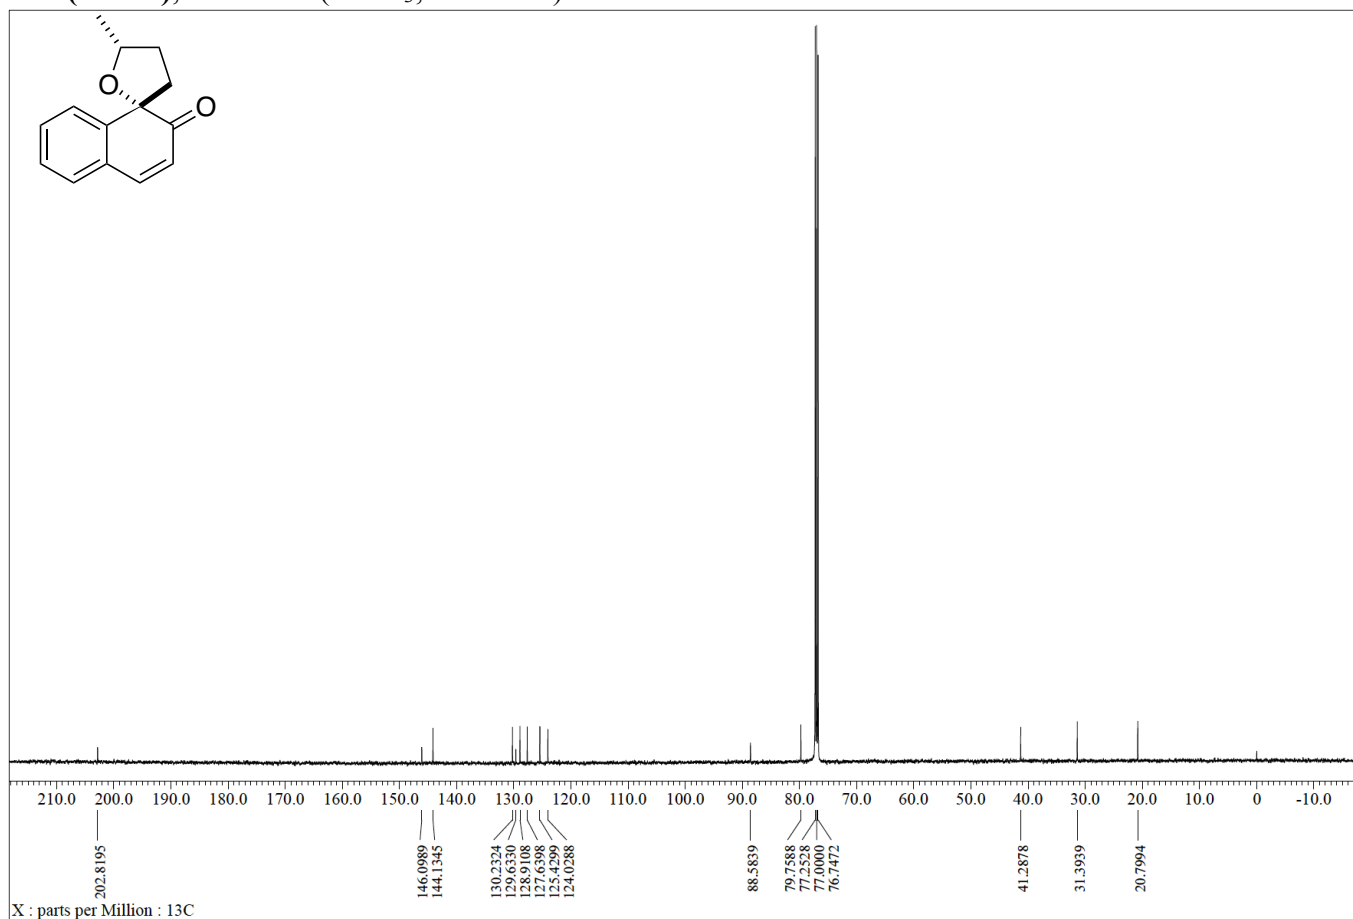

**2m**,  $^1\text{H}$  NMR ( $\text{CDCl}_3$ , 400 MHz)

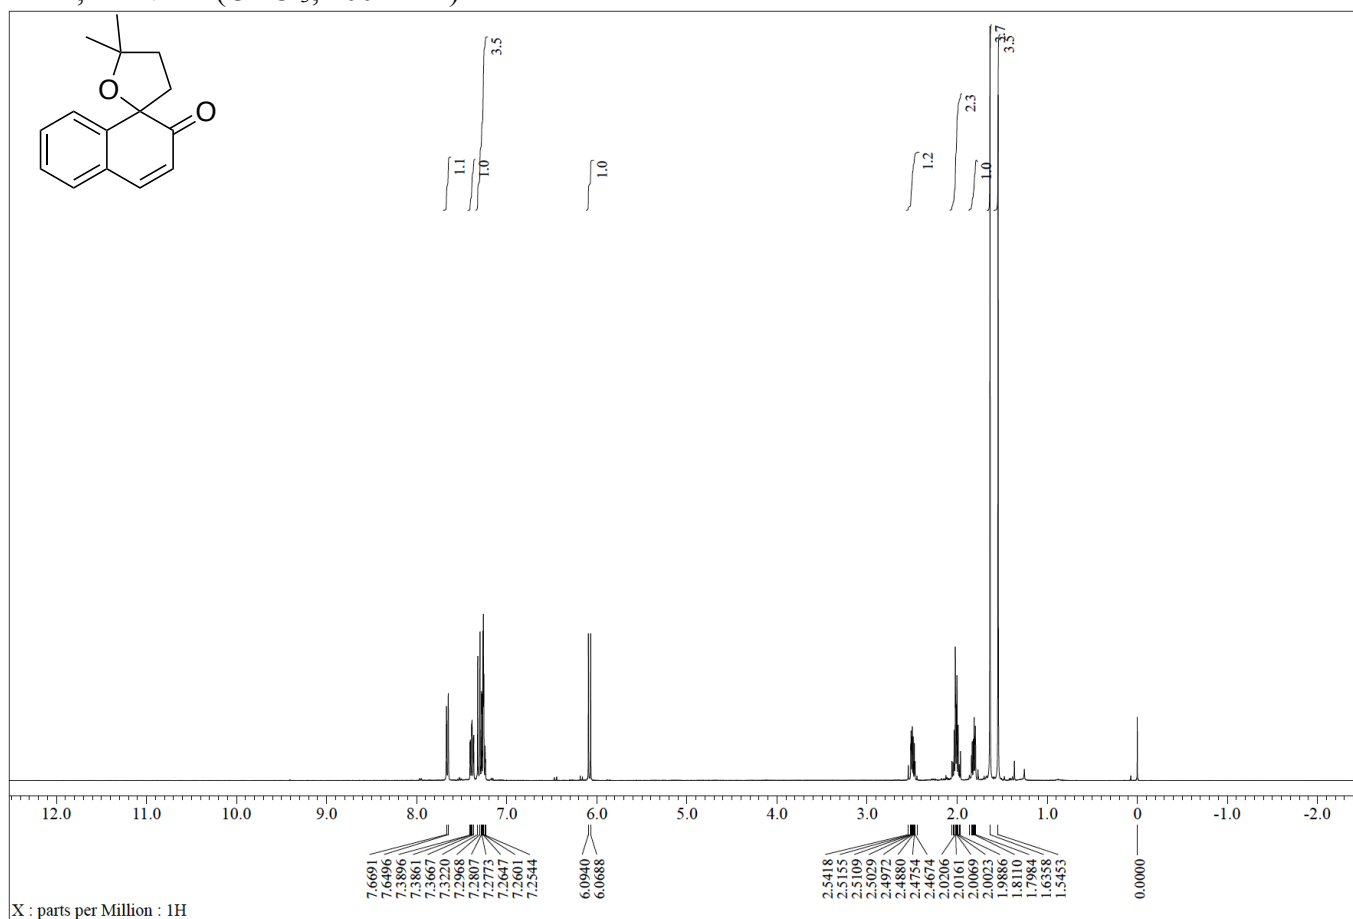

**2m**,  $^{13}\text{C}$  NMR ( $\text{CDCl}_3$ , 100 MHz)

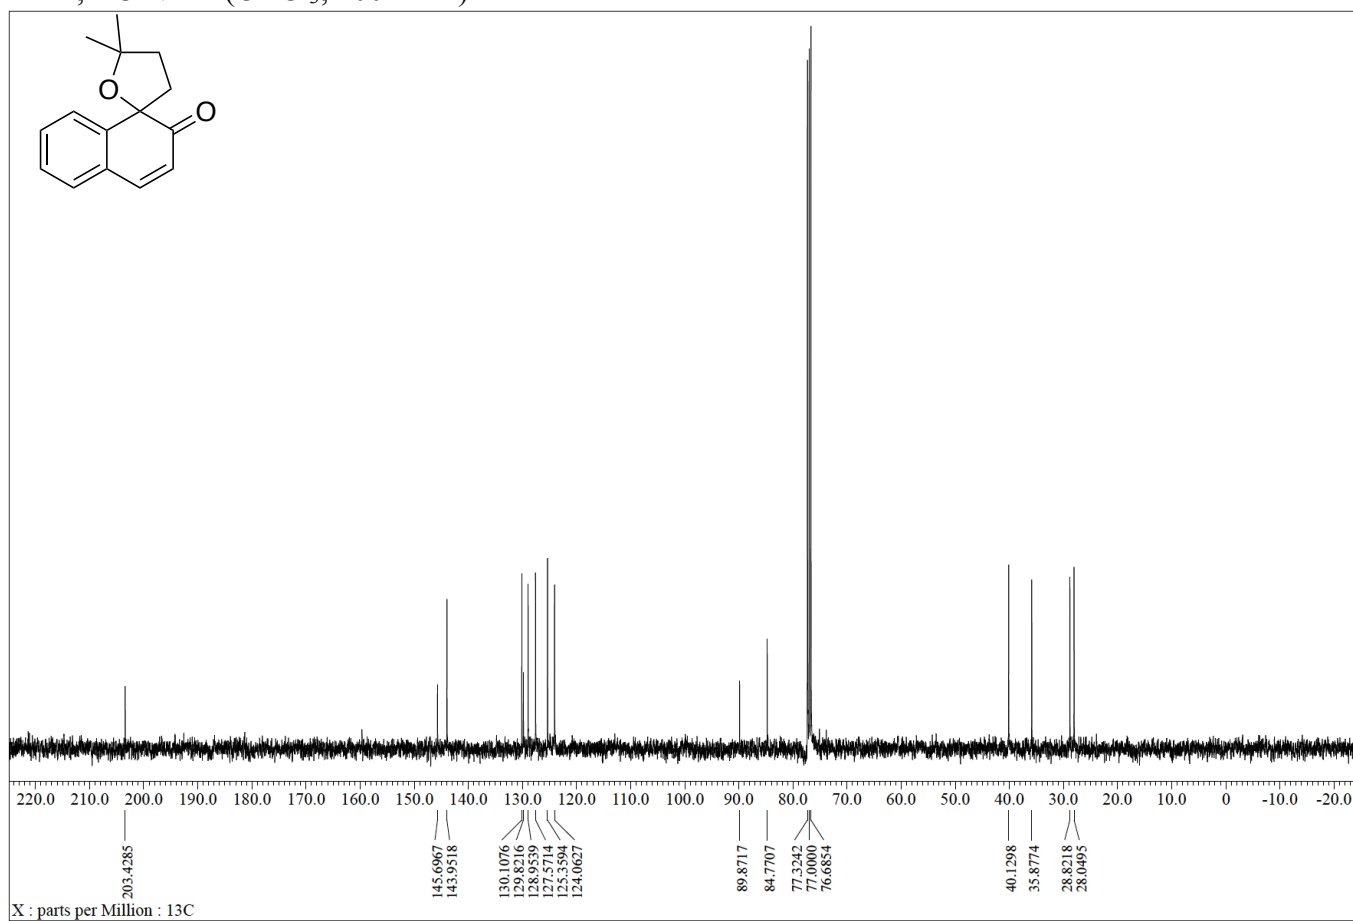

**2n**,  $^1\text{H}$  NMR ( $\text{CDCl}_3$ , 400 MHz)

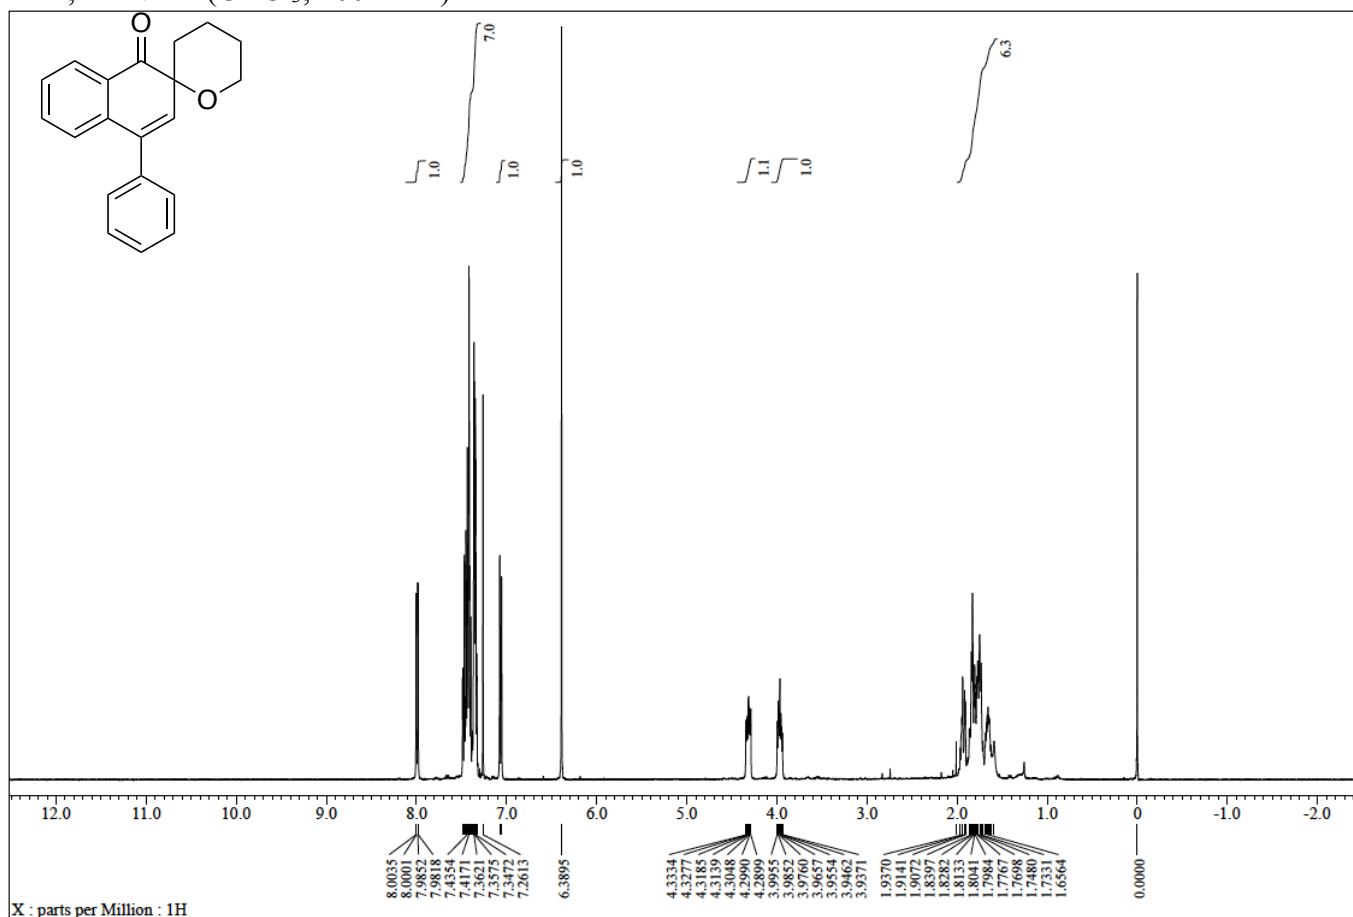

**2n**,  $^{13}\text{C}$  NMR ( $\text{CDCl}_3$ , 100 MHz)

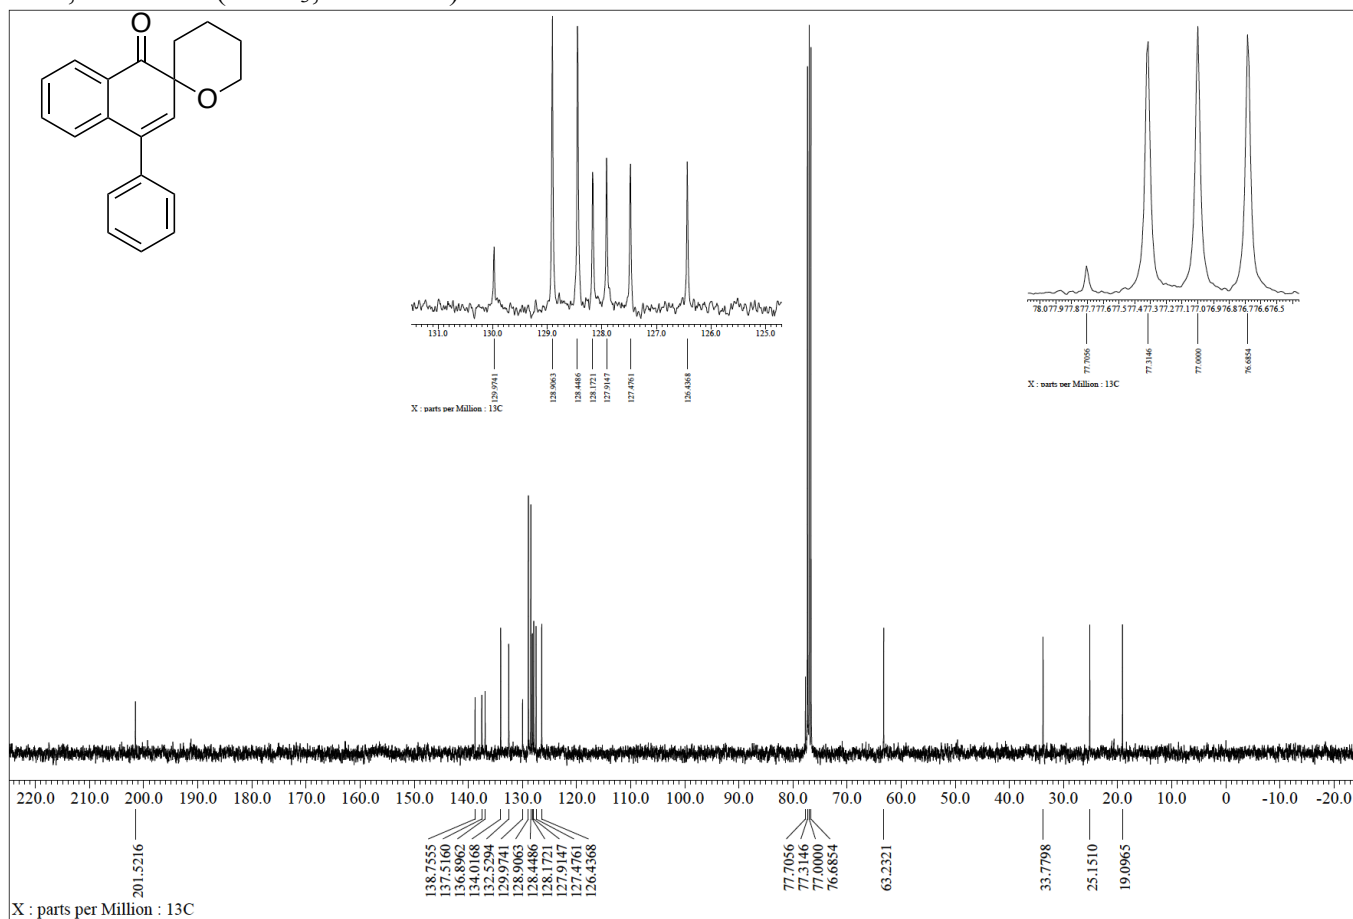



**5**,  $^1\text{H}$  NMR ( $\text{CDCl}_3$ , 500 MHz)

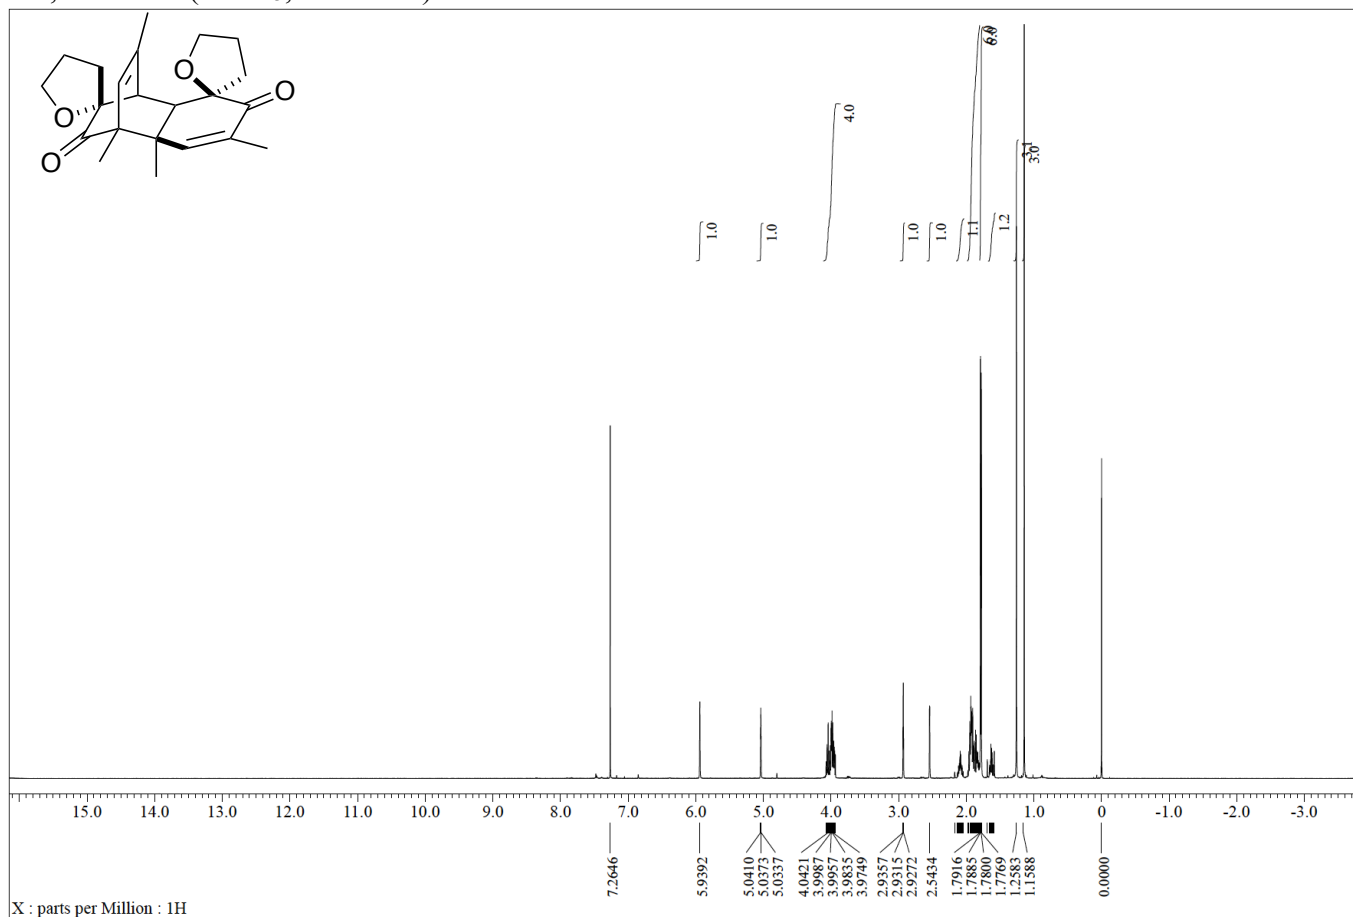

**5**,  $^{13}\text{C}$  NMR ( $\text{CDCl}_3$ , 125 MHz)

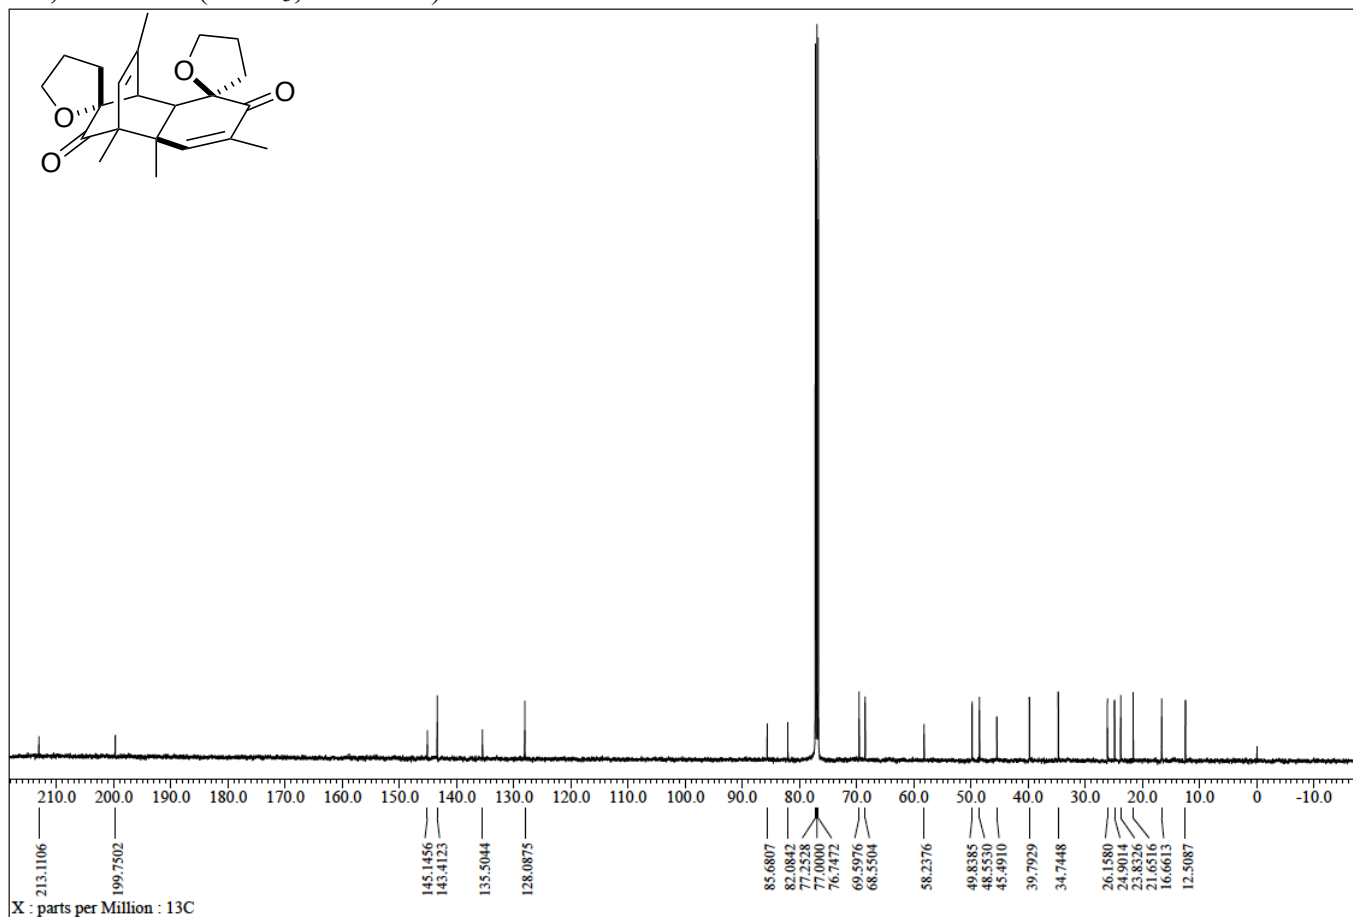

**4a**,  $^1\text{H}$  NMR ( $\text{CDCl}_3$ , 400 MHz)

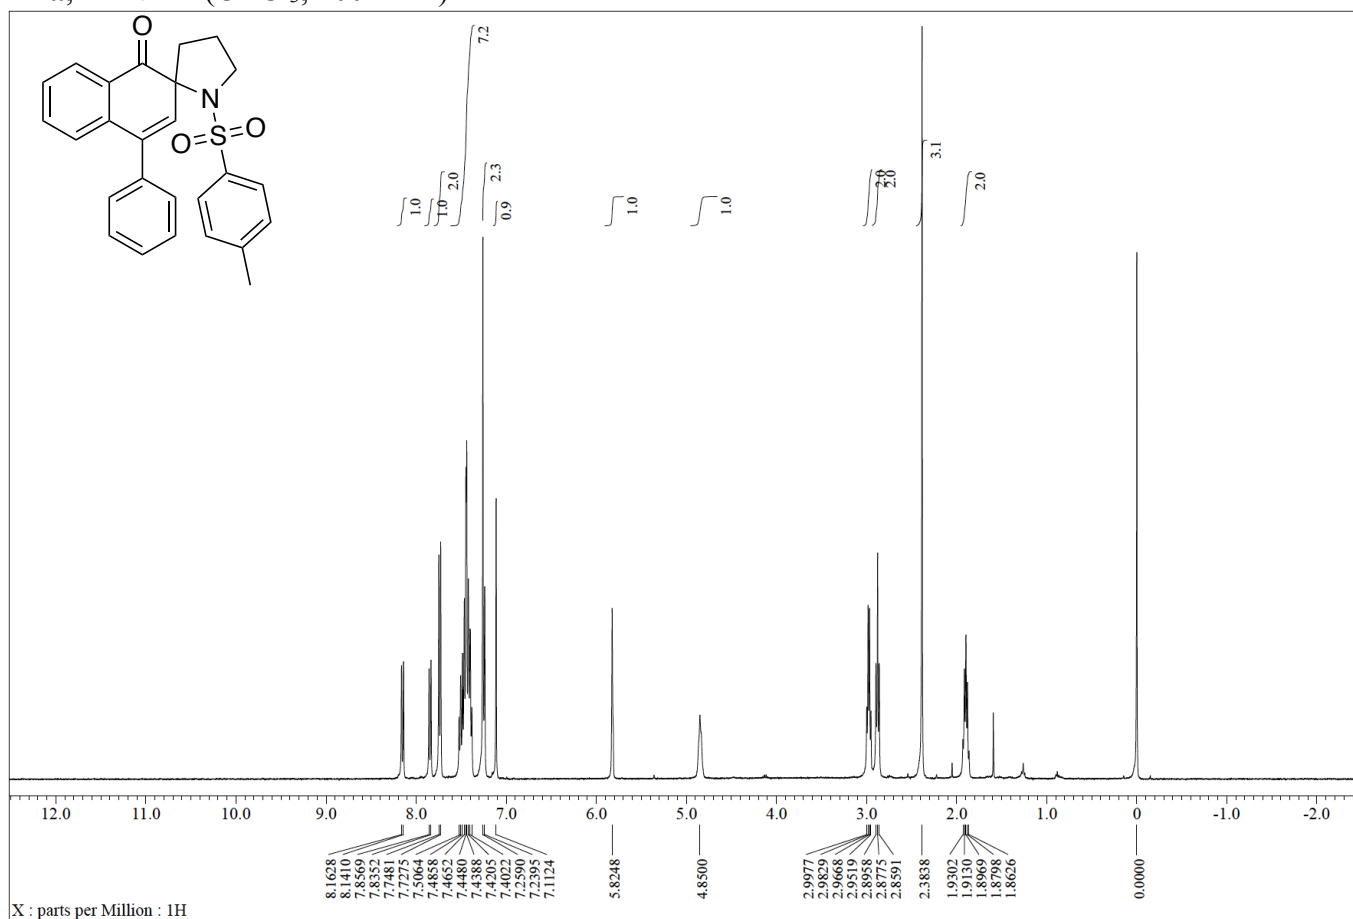

**4a**,  $^{13}\text{C}$  NMR ( $\text{CDCl}_3$ , 100 MHz)

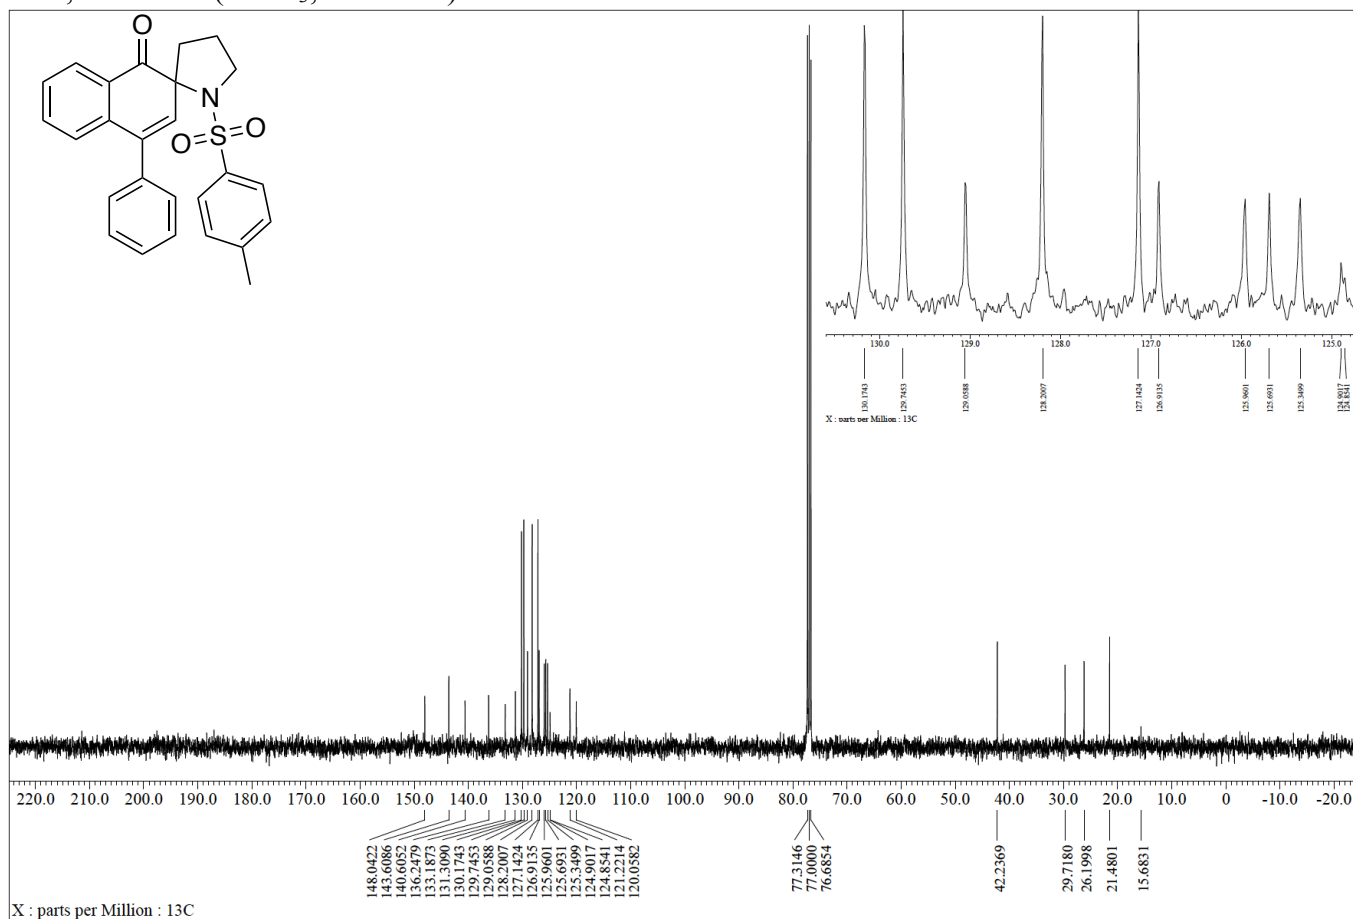

**4aa**,  $^1\text{H}$  NMR ( $\text{CDCl}_3$ , 400 MHz)

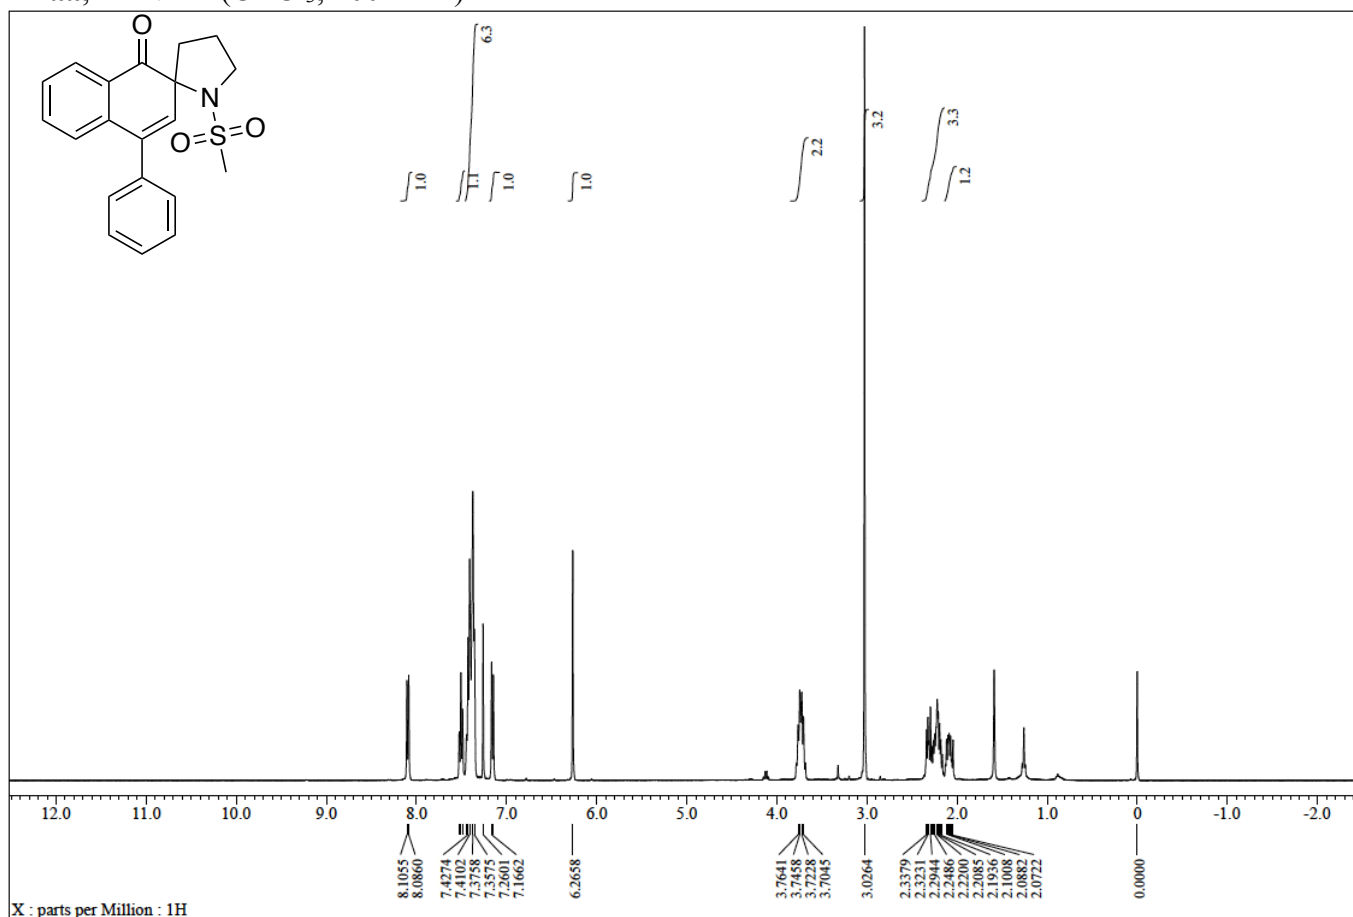

**4aa**,  $^{13}\text{C}$  NMR ( $\text{CDCl}_3$ , 100 MHz)

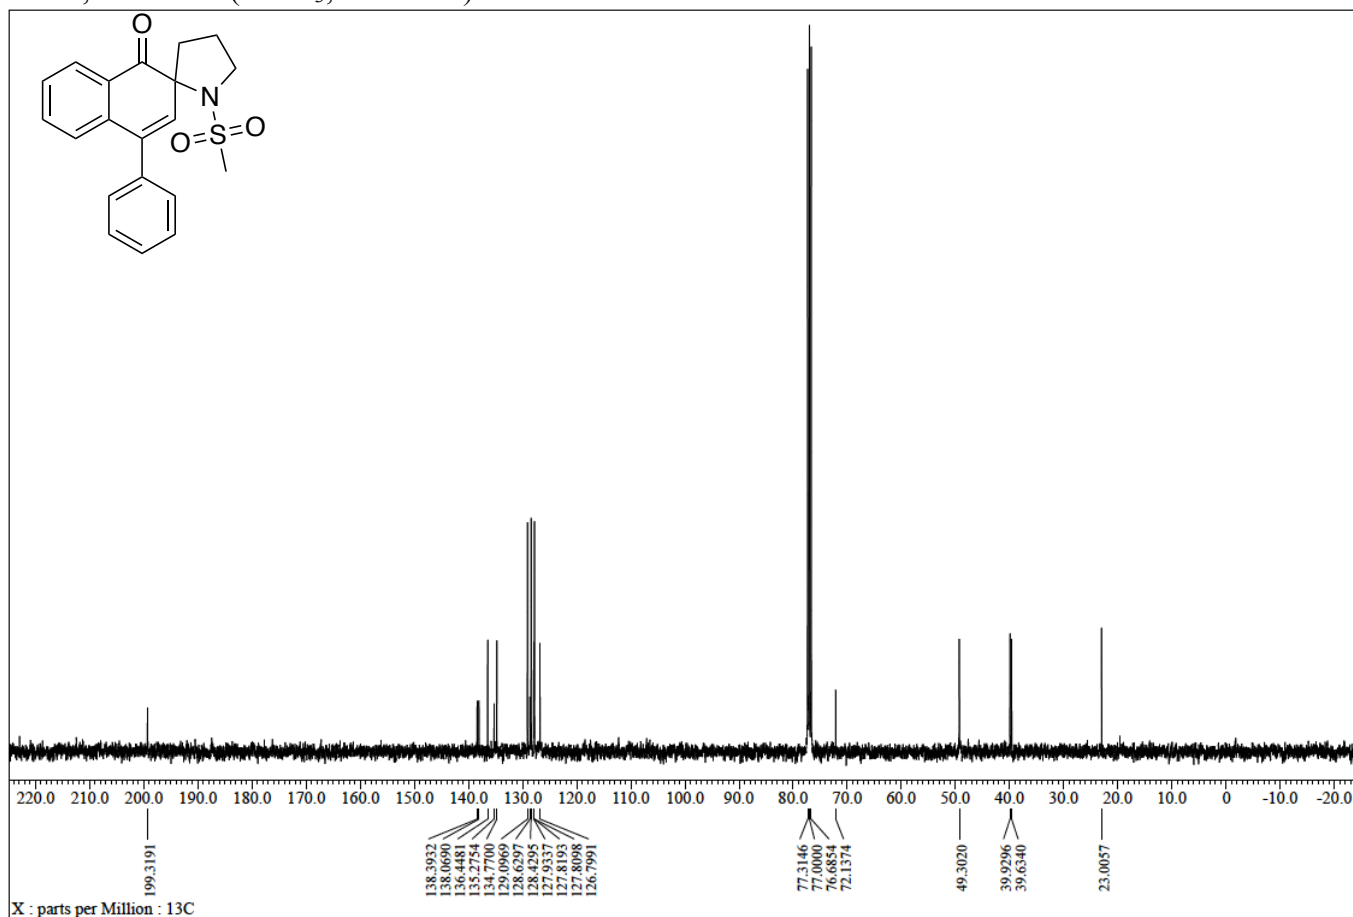

**4ab**,  $^1\text{H}$  NMR ( $\text{CDCl}_3$ , 400 MHz)

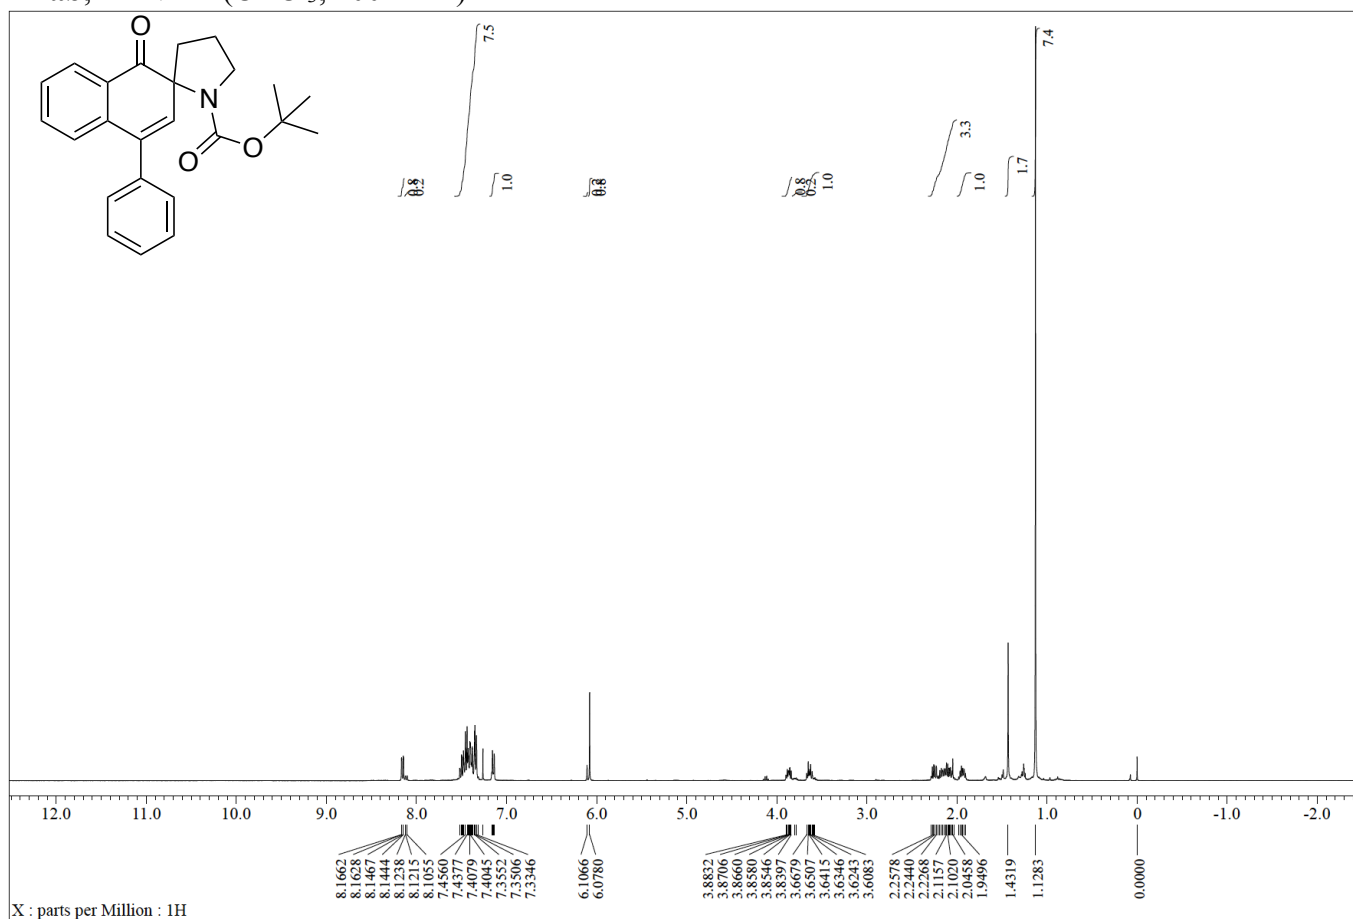

**4ab**,  $^{13}\text{C}$  NMR ( $\text{CDCl}_3$ , 100 MHz)

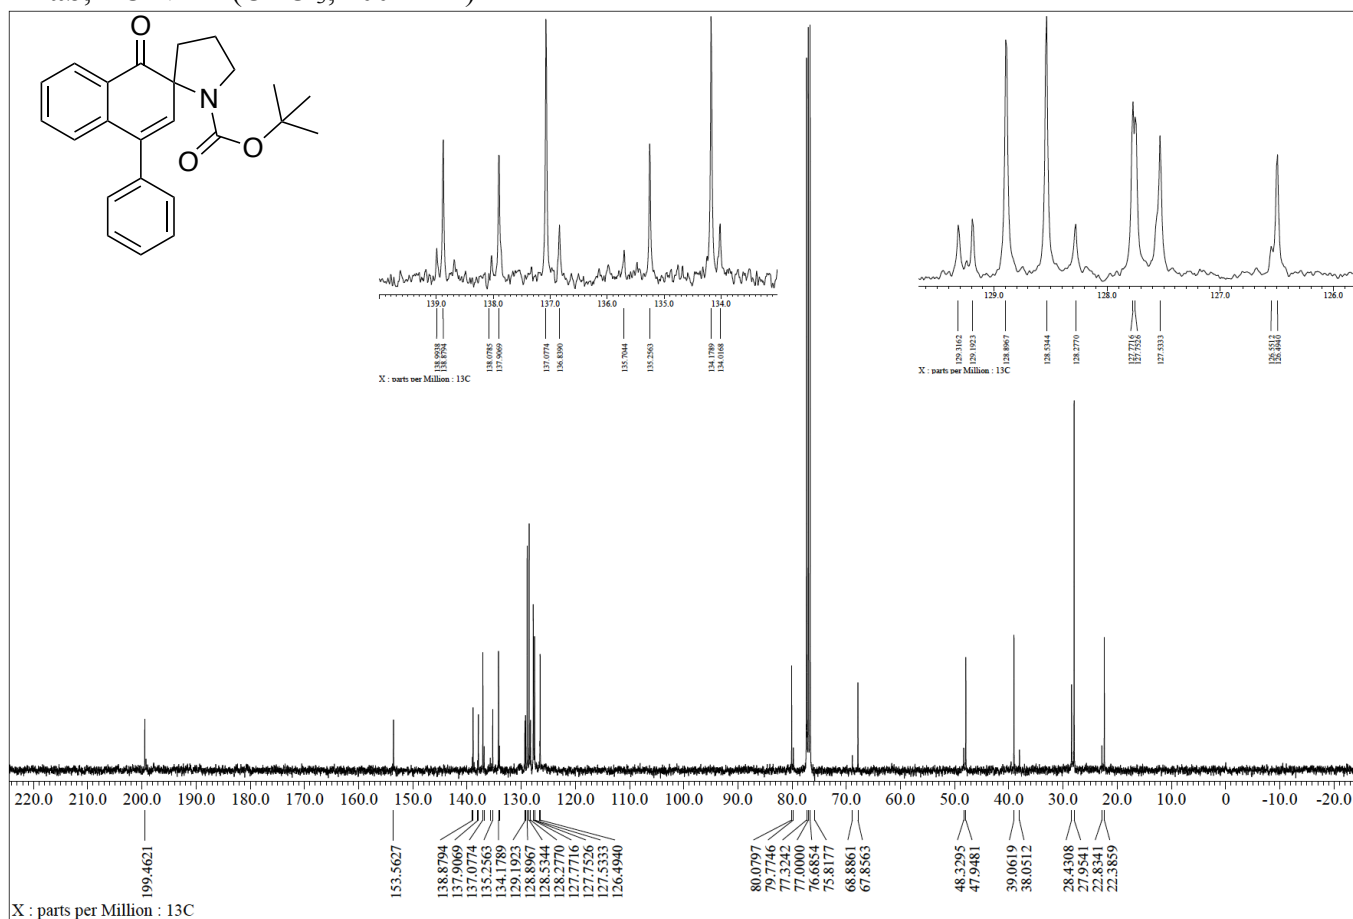

**4b**,  $^1\text{H}$  NMR ( $\text{CDCl}_3$ , 400 MHz)

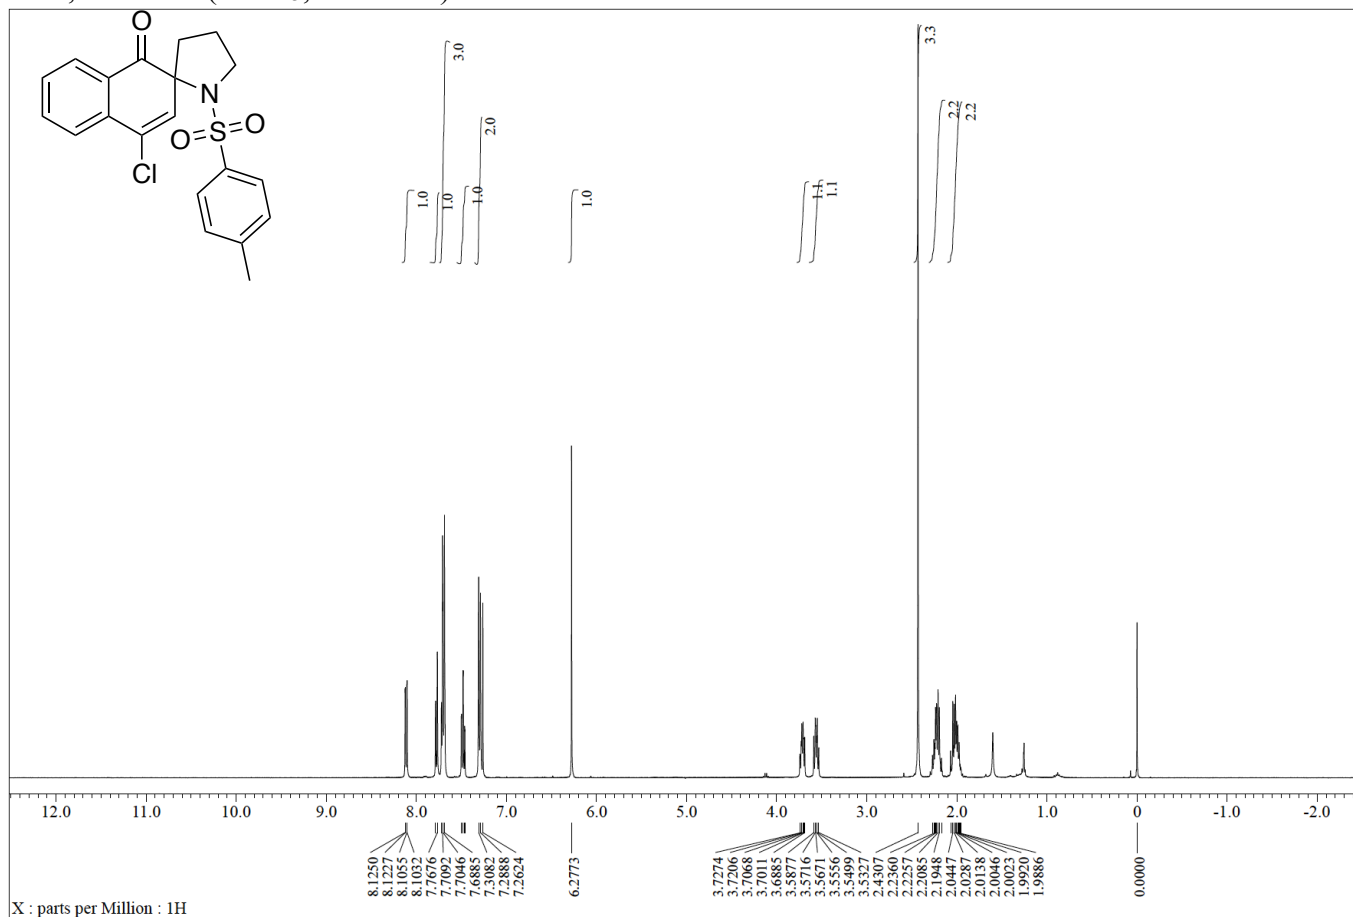

**4b**,  $^{13}\text{C}$  NMR ( $\text{CDCl}_3$ , 100 MHz)

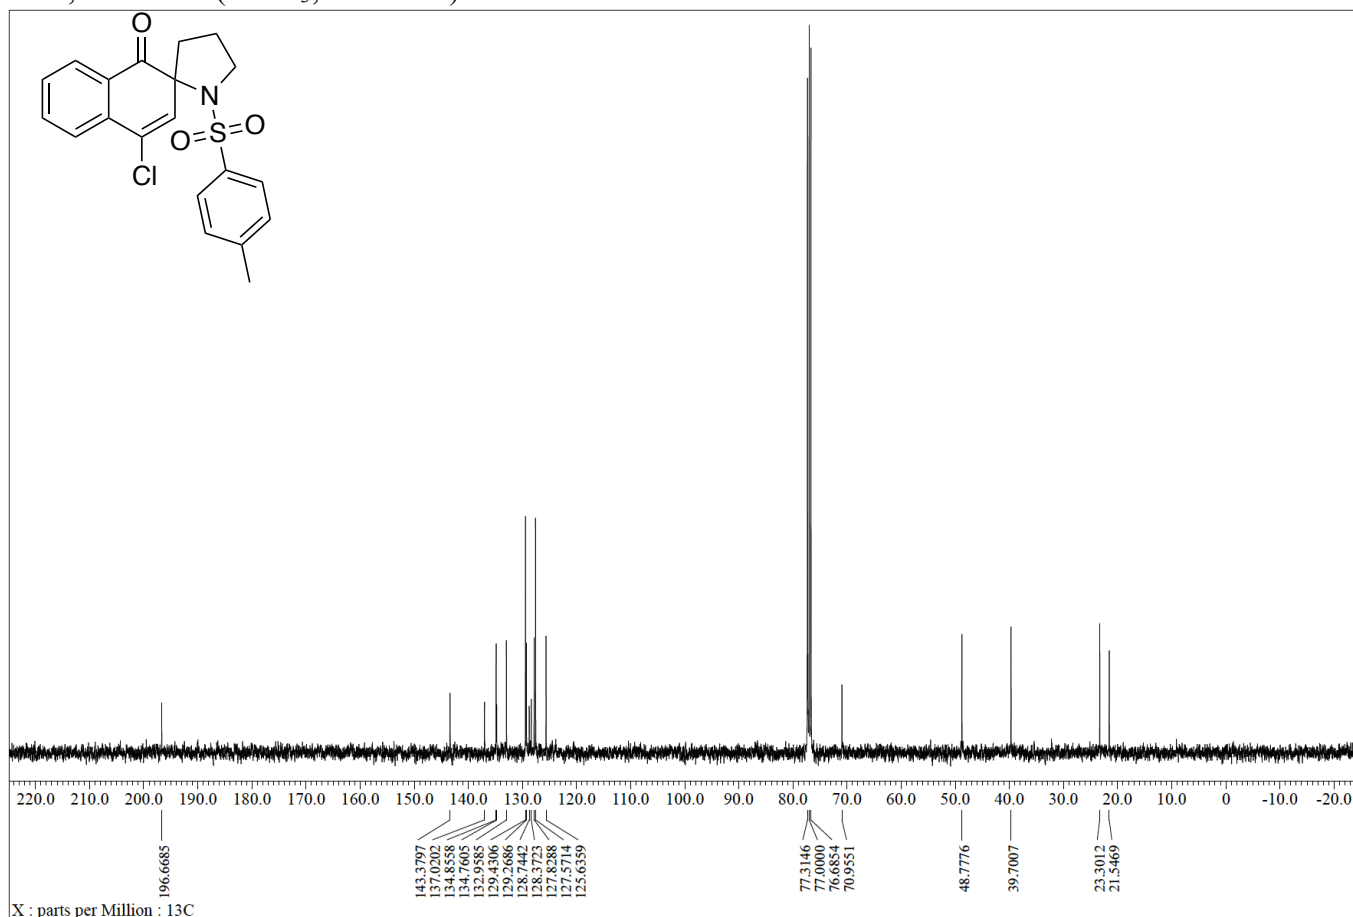

**4c**,  $^1\text{H}$  NMR ( $\text{CDCl}_3$ , 400 MHz)

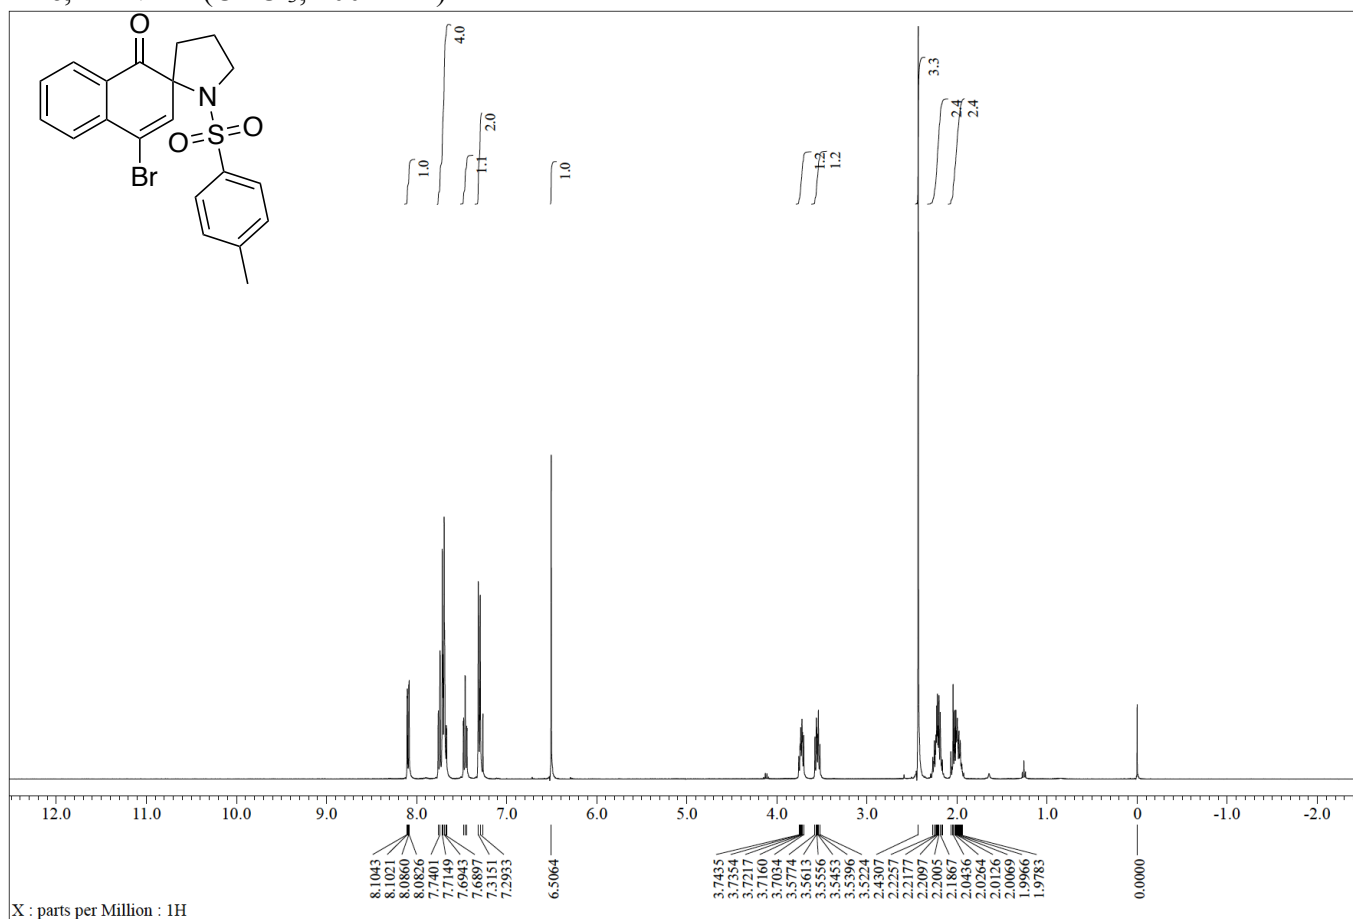

**4c**,  $^{13}\text{C}$  NMR ( $\text{CDCl}_3$ , 100 MHz)

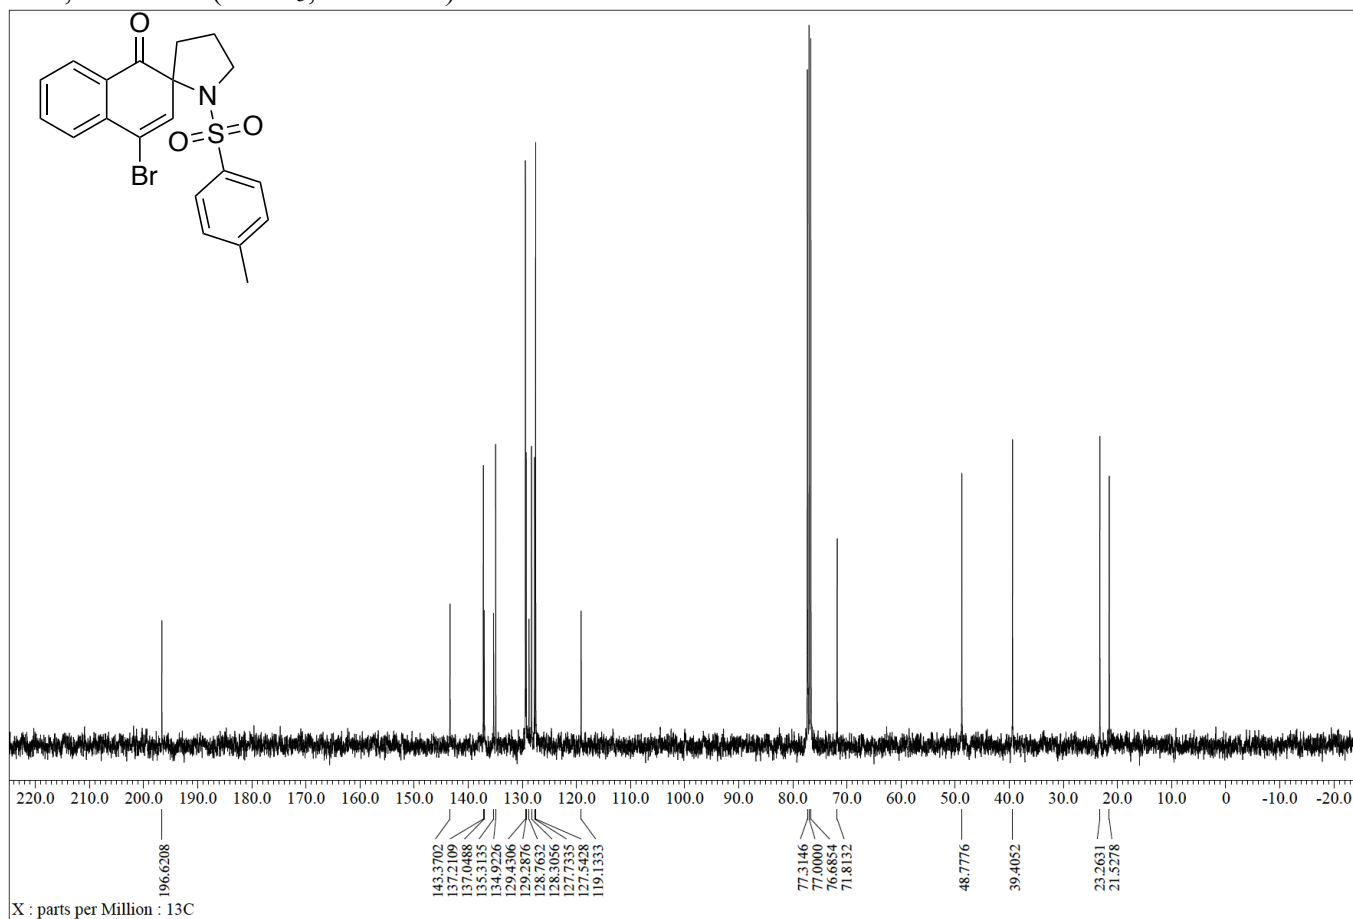

**4d**,  $^1\text{H}$  NMR ( $\text{CDCl}_3$ , 400 MHz)

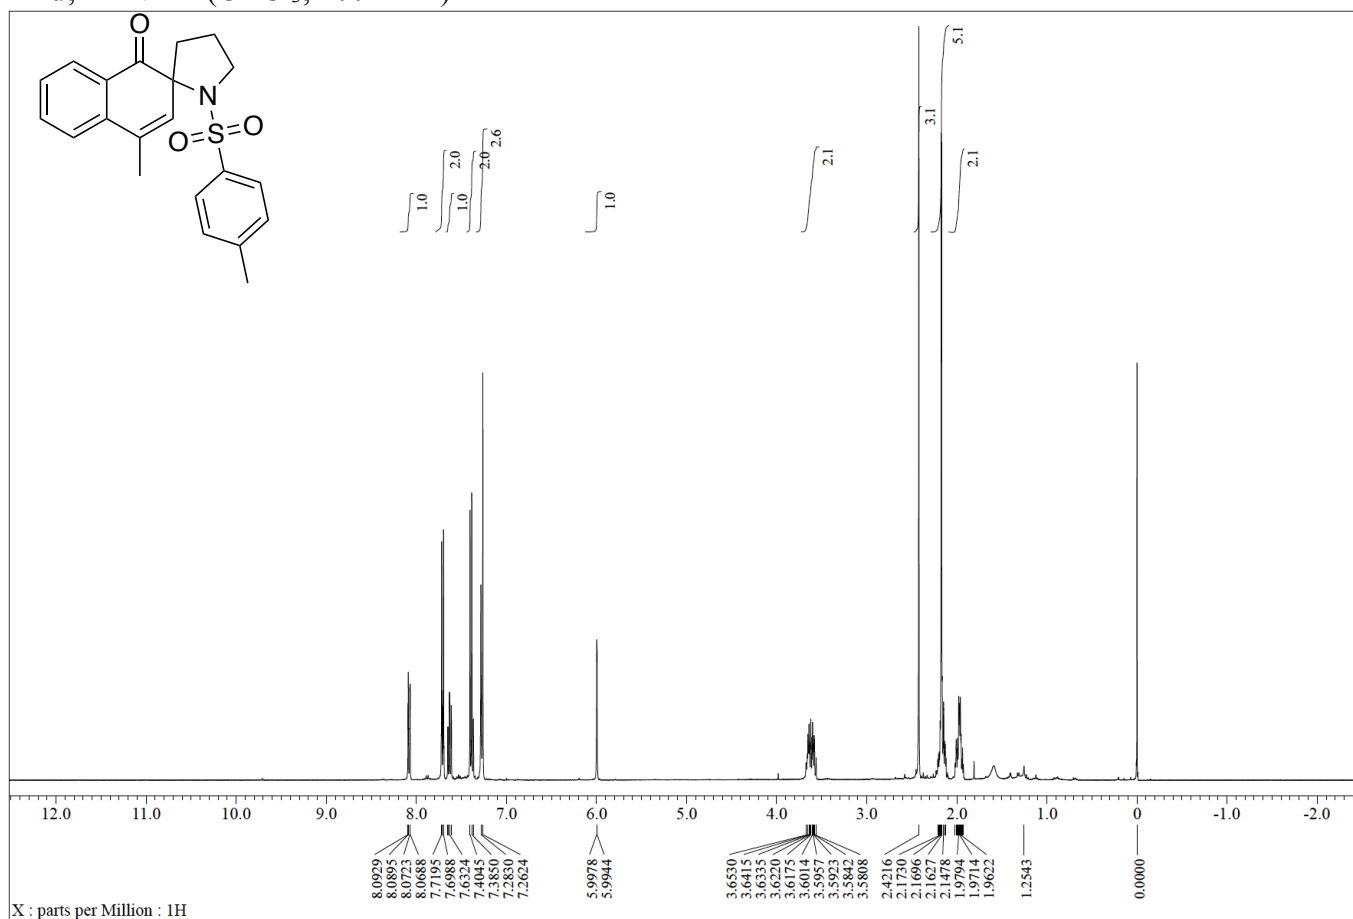

**4d**,  $^{13}\text{C}$  NMR ( $\text{CDCl}_3$ , 100 MHz)

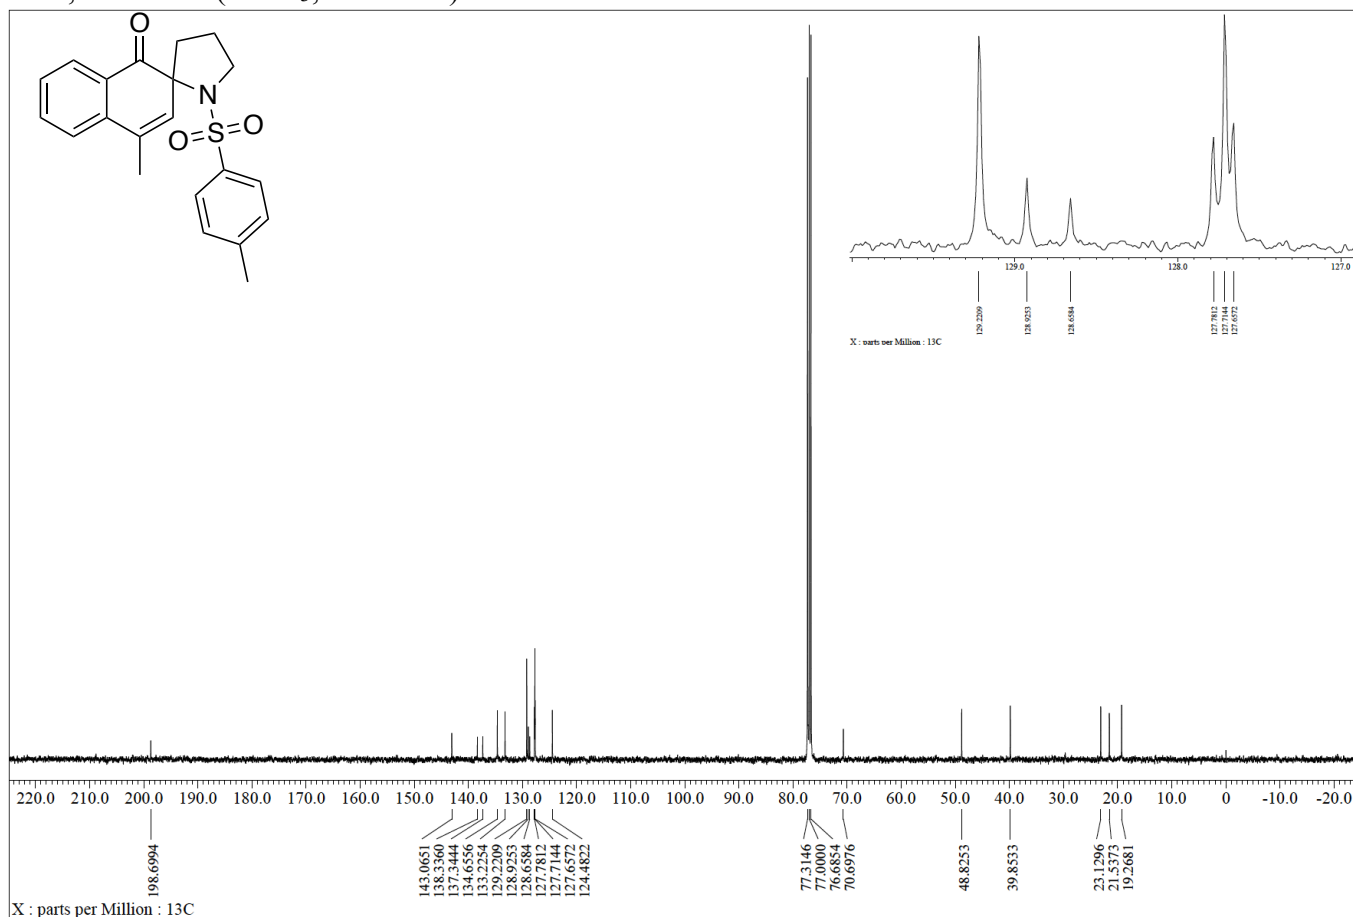

**4e**,  $^1\text{H}$  NMR ( $\text{CDCl}_3$ , 400 MHz)

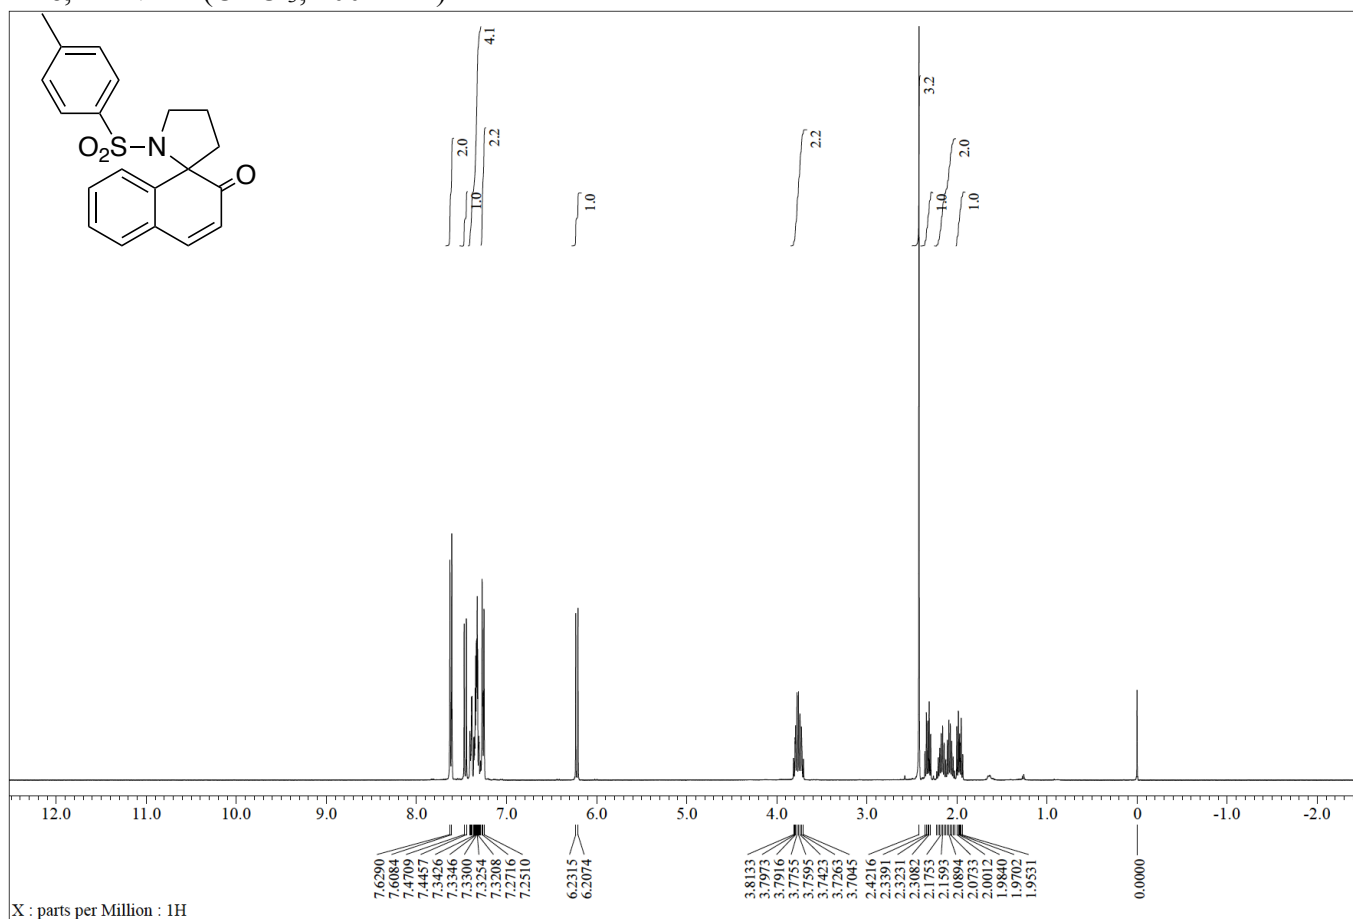

**4e**,  $^{13}\text{C}$  NMR ( $\text{CDCl}_3$ , 100 MHz)

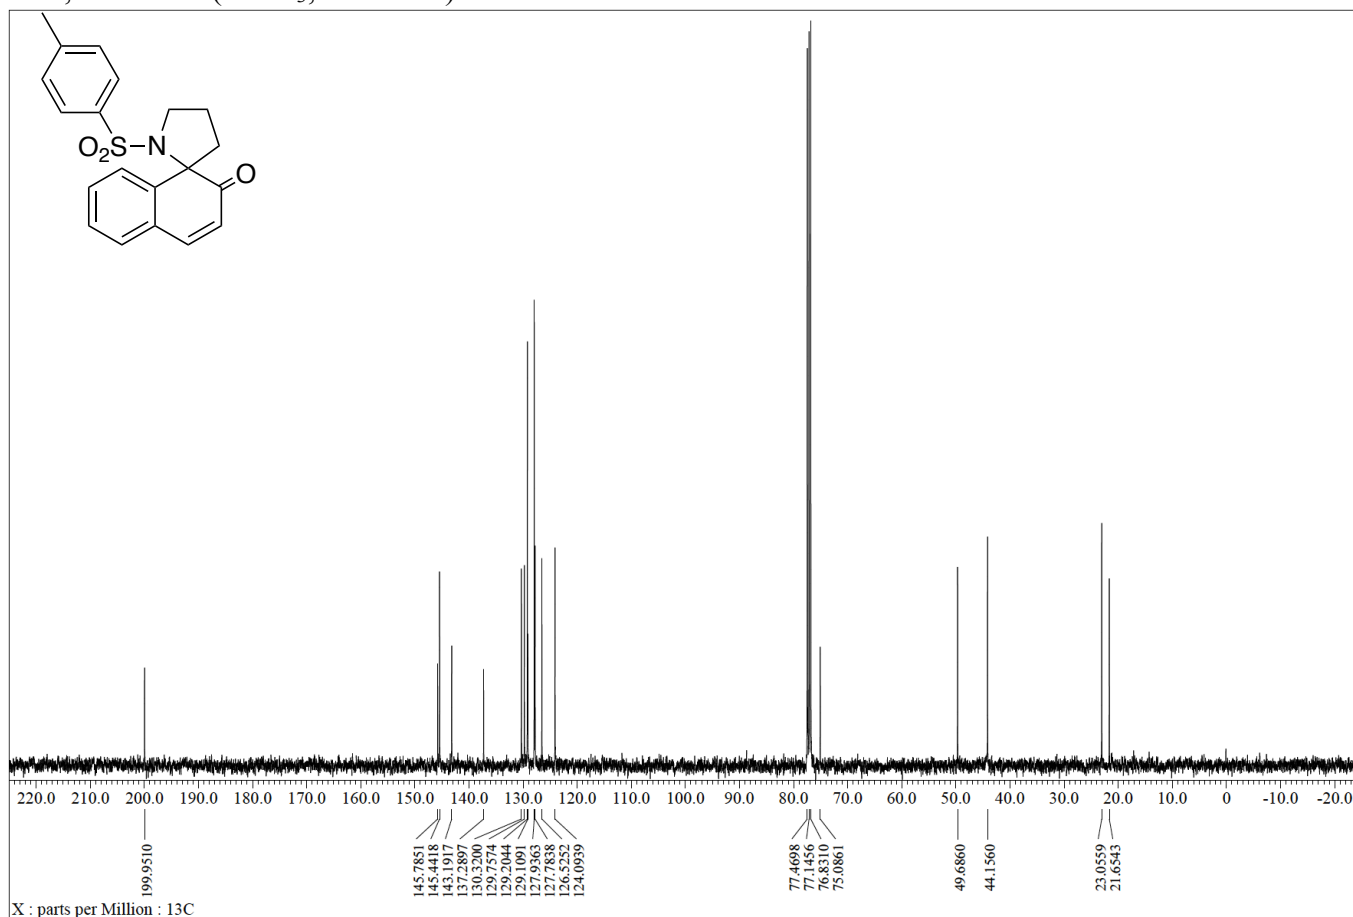



**4ea**,  $^1\text{H}$  NMR ( $\text{CDCl}_3$ , 400 MHz)

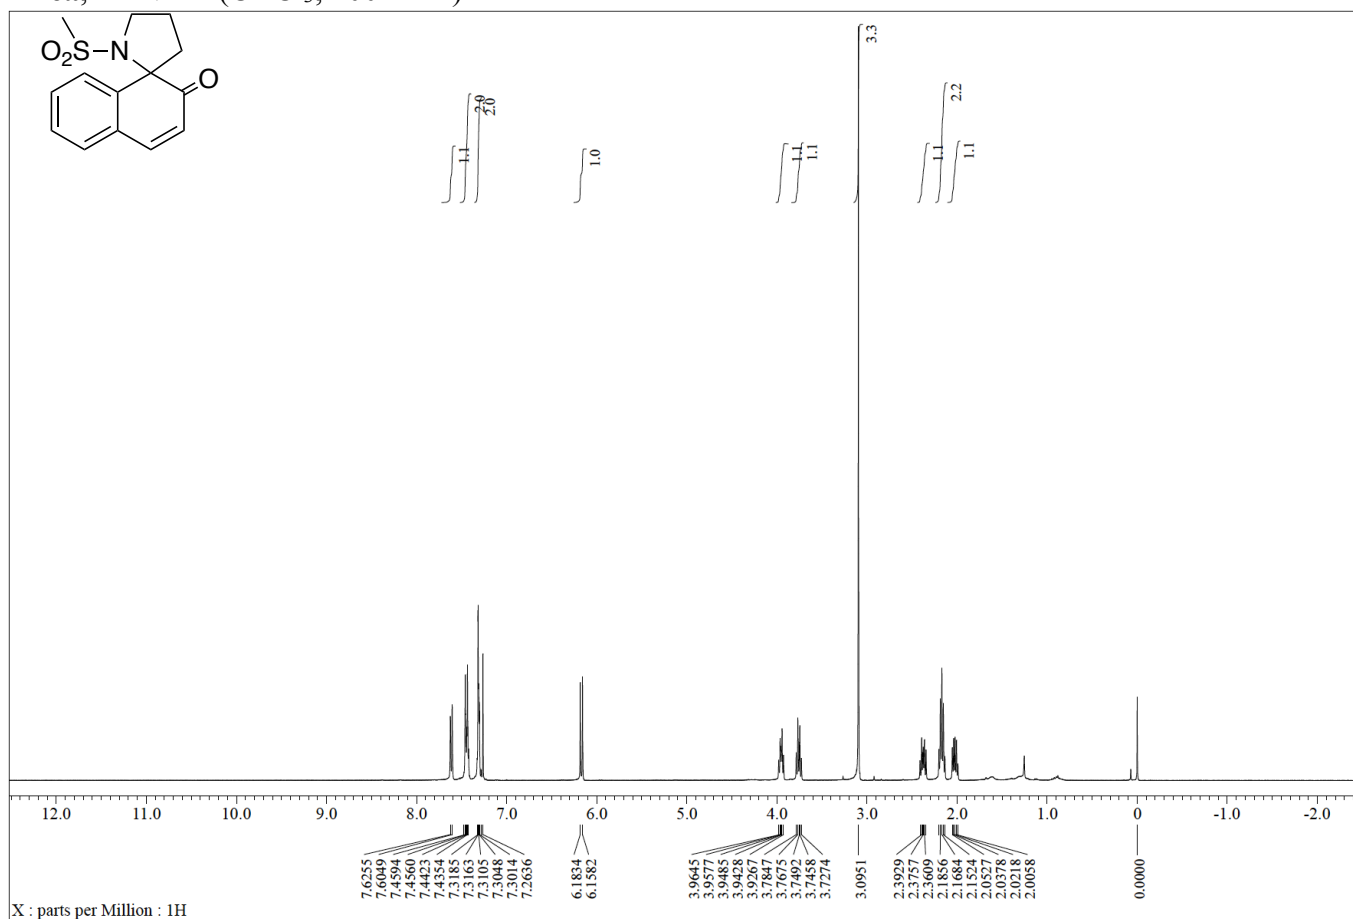

**4ea**,  $^{13}\text{C}$  NMR ( $\text{CDCl}_3$ , 100 MHz)

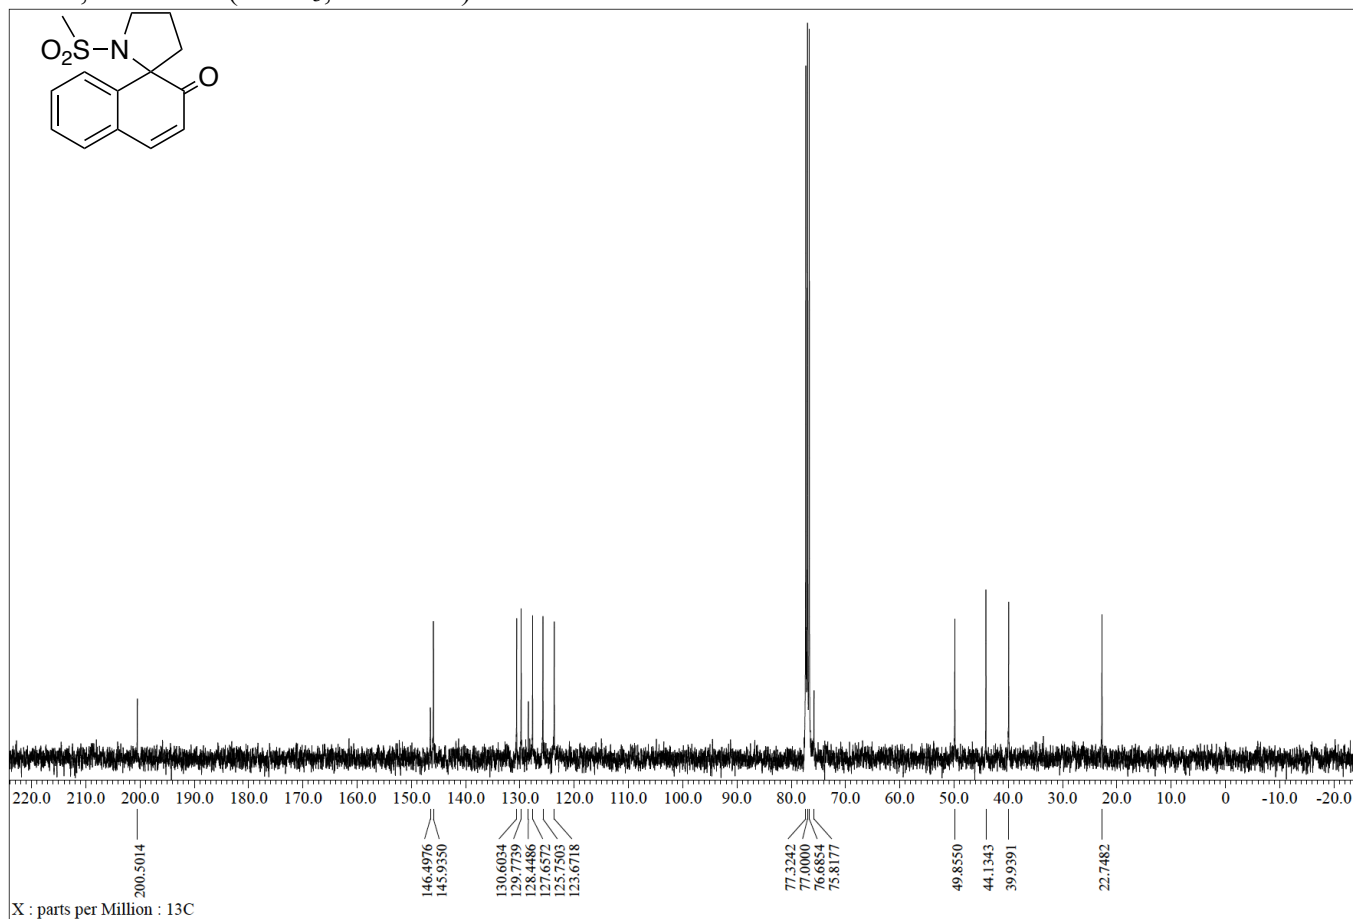

**4f**,  $^1\text{H}$  NMR ( $\text{CDCl}_3$ , 400 MHz)

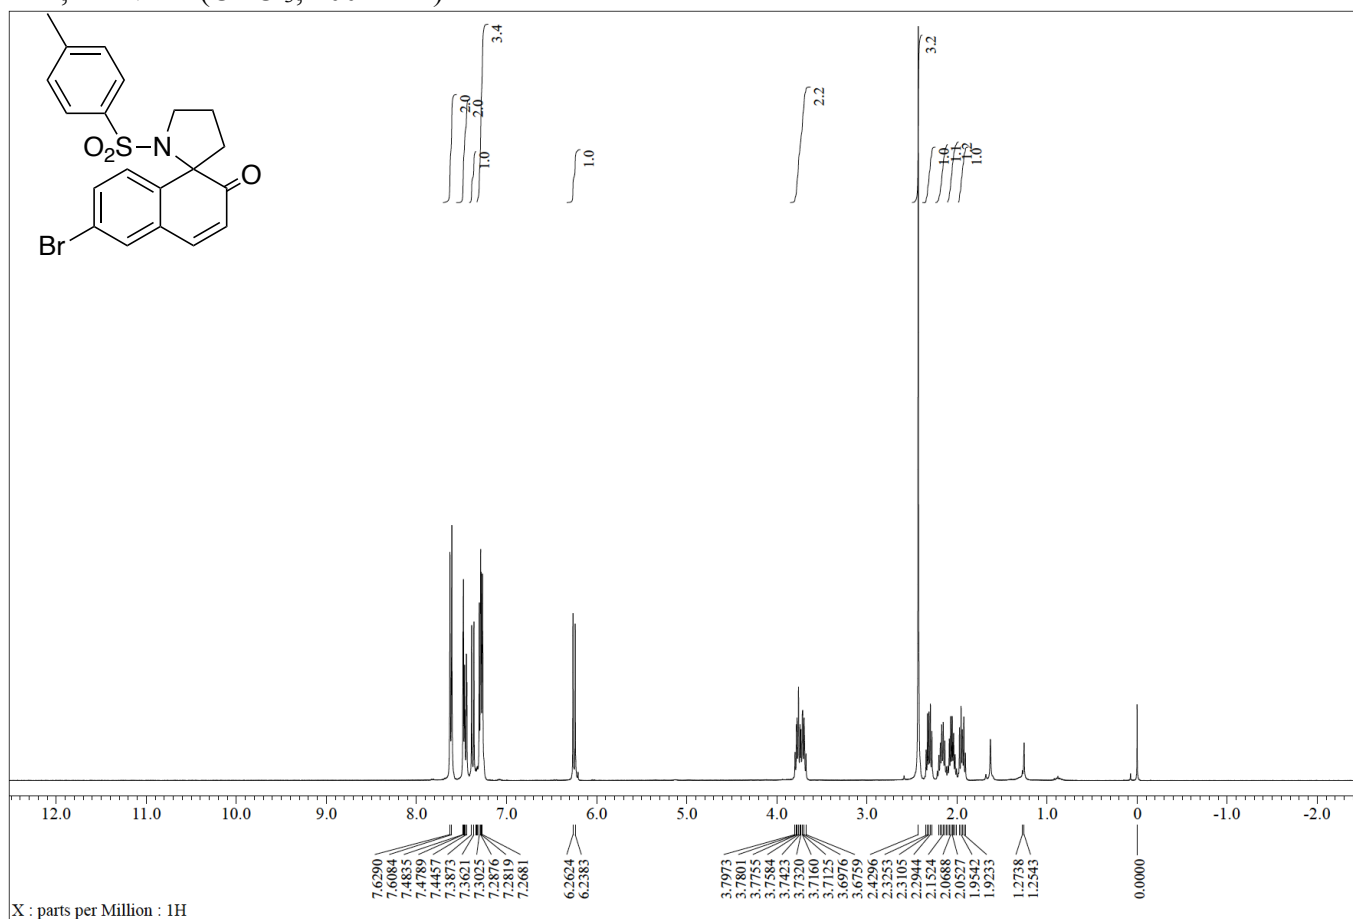

**4f**,  $^{13}\text{C}$  NMR ( $\text{CDCl}_3$ , 100 MHz)

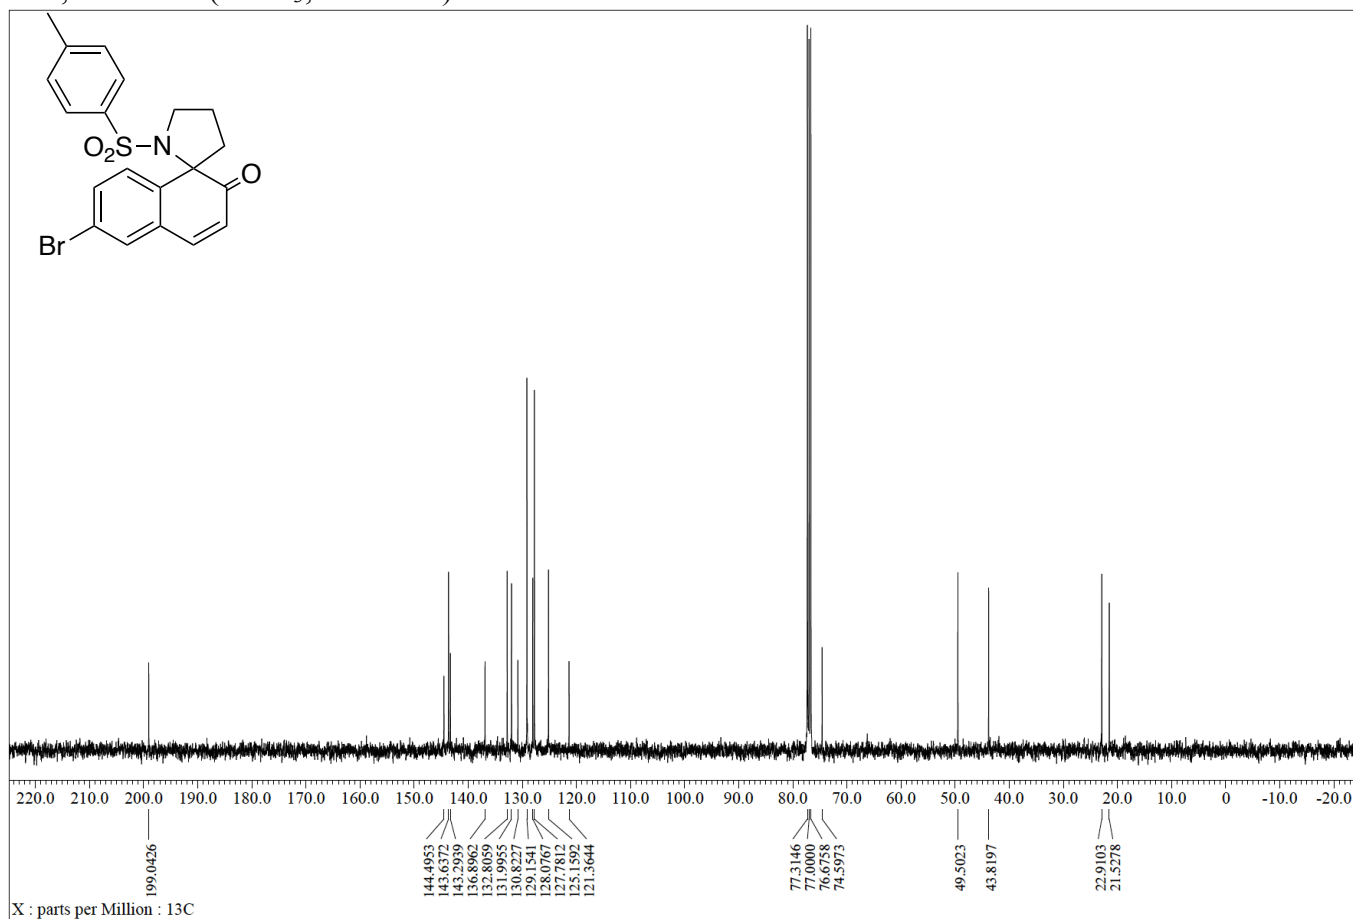

**4g**,  $^1\text{H}$  NMR ( $\text{CDCl}_3$ , 400 MHz)

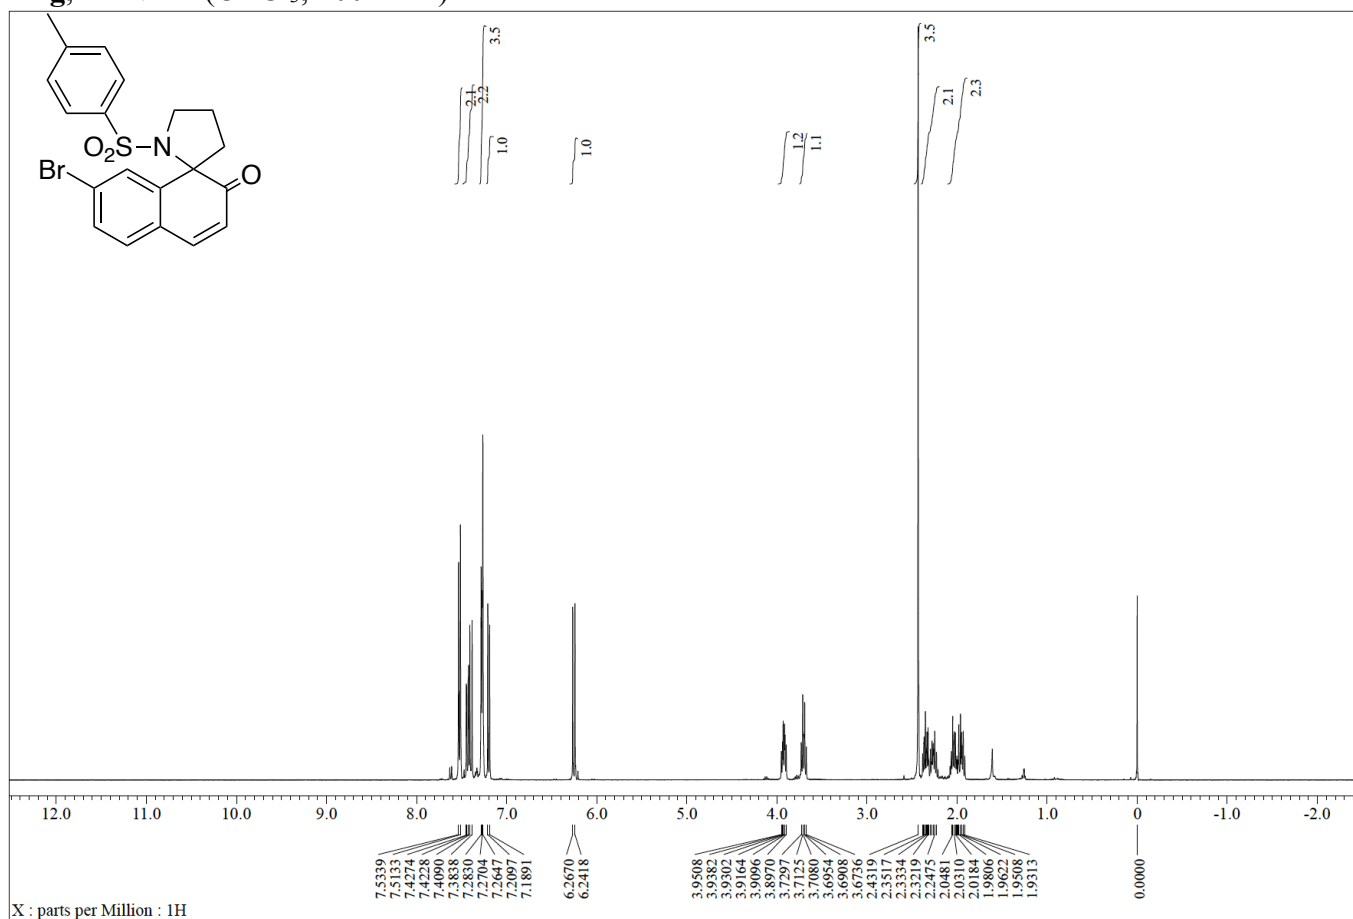

**4g**,  $^{13}\text{C}$  NMR ( $\text{CDCl}_3$ , 100 MHz)

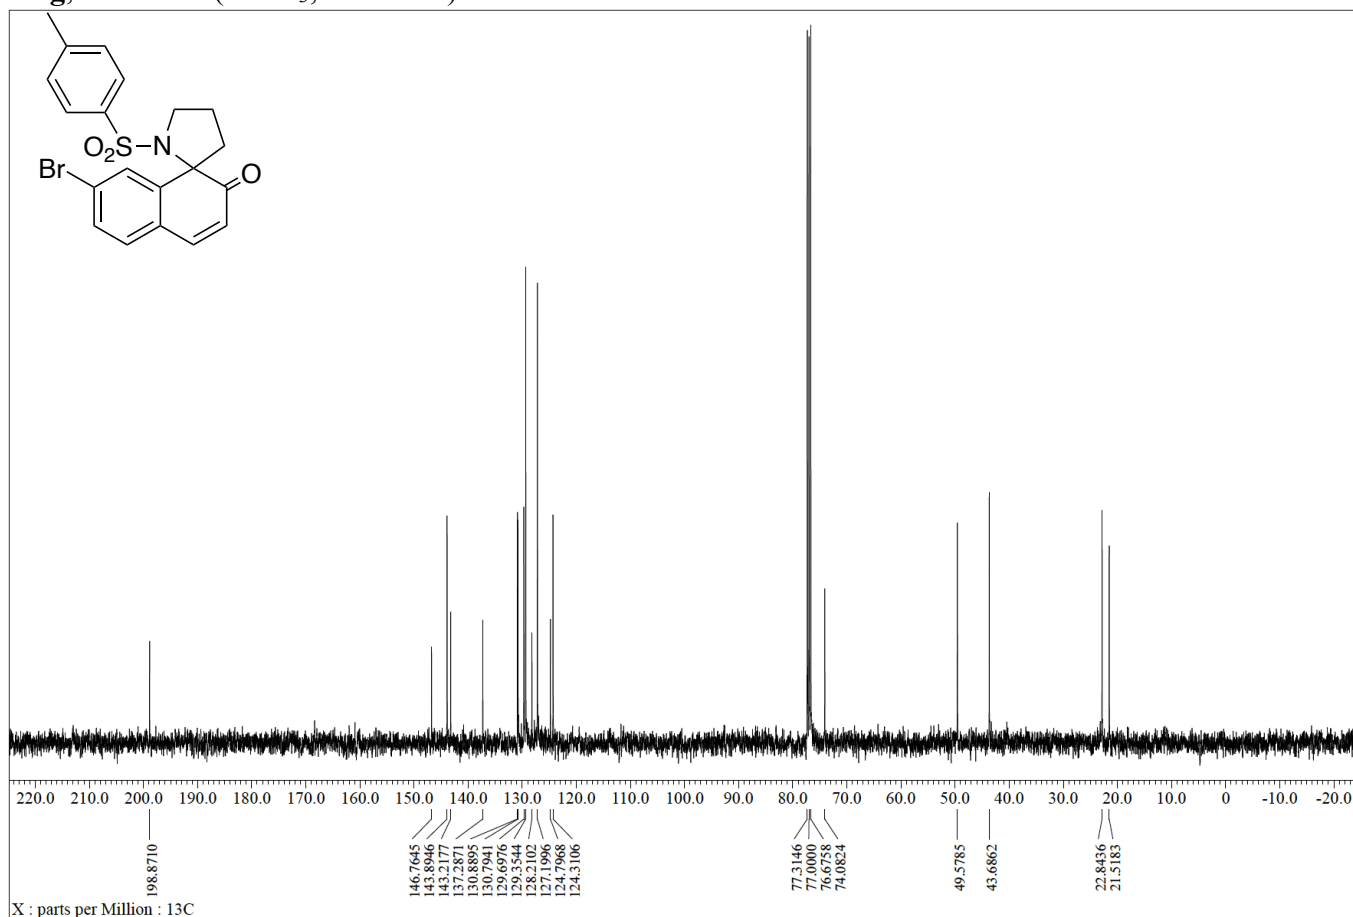

**4h**,  $^1\text{H}$  NMR ( $\text{CDCl}_3$ , 400 MHz)

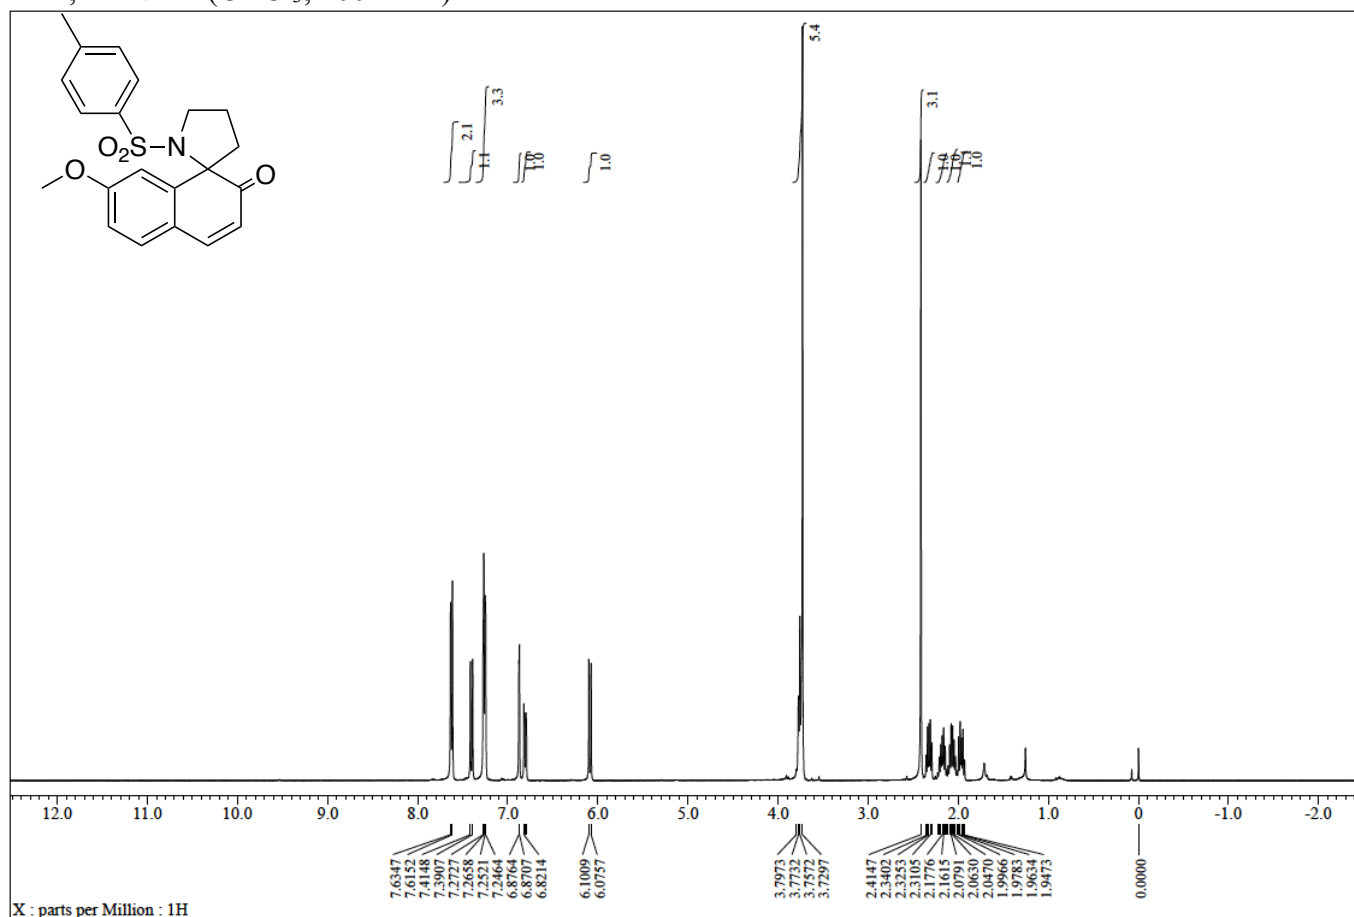

**4h**, <sup>13</sup>C NMR (CDCl<sub>3</sub>, 100 MHz)

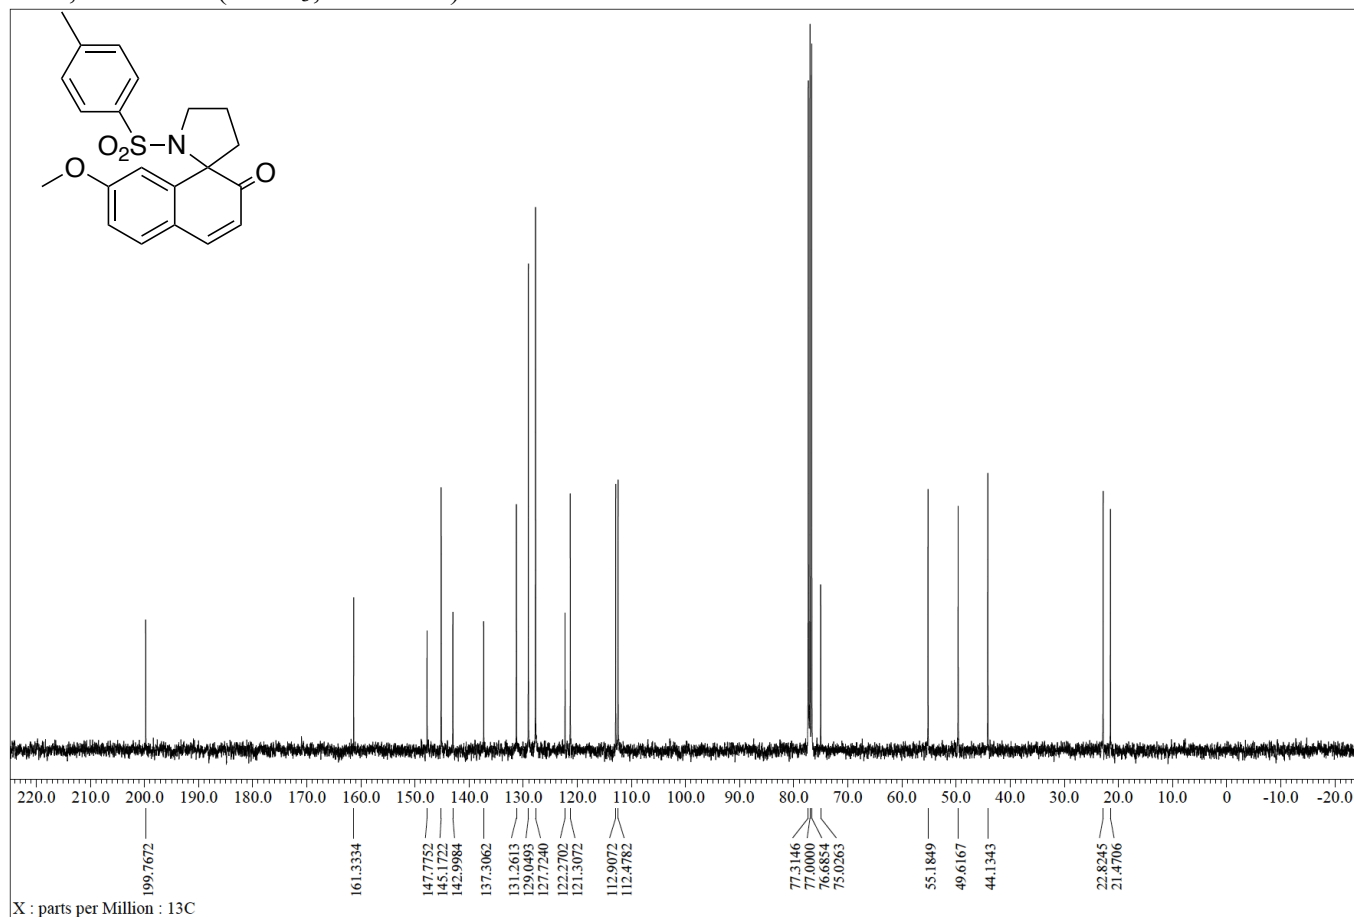

**4i**,  $^1\text{H}$  NMR ( $\text{CDCl}_3$ , 400 MHz)

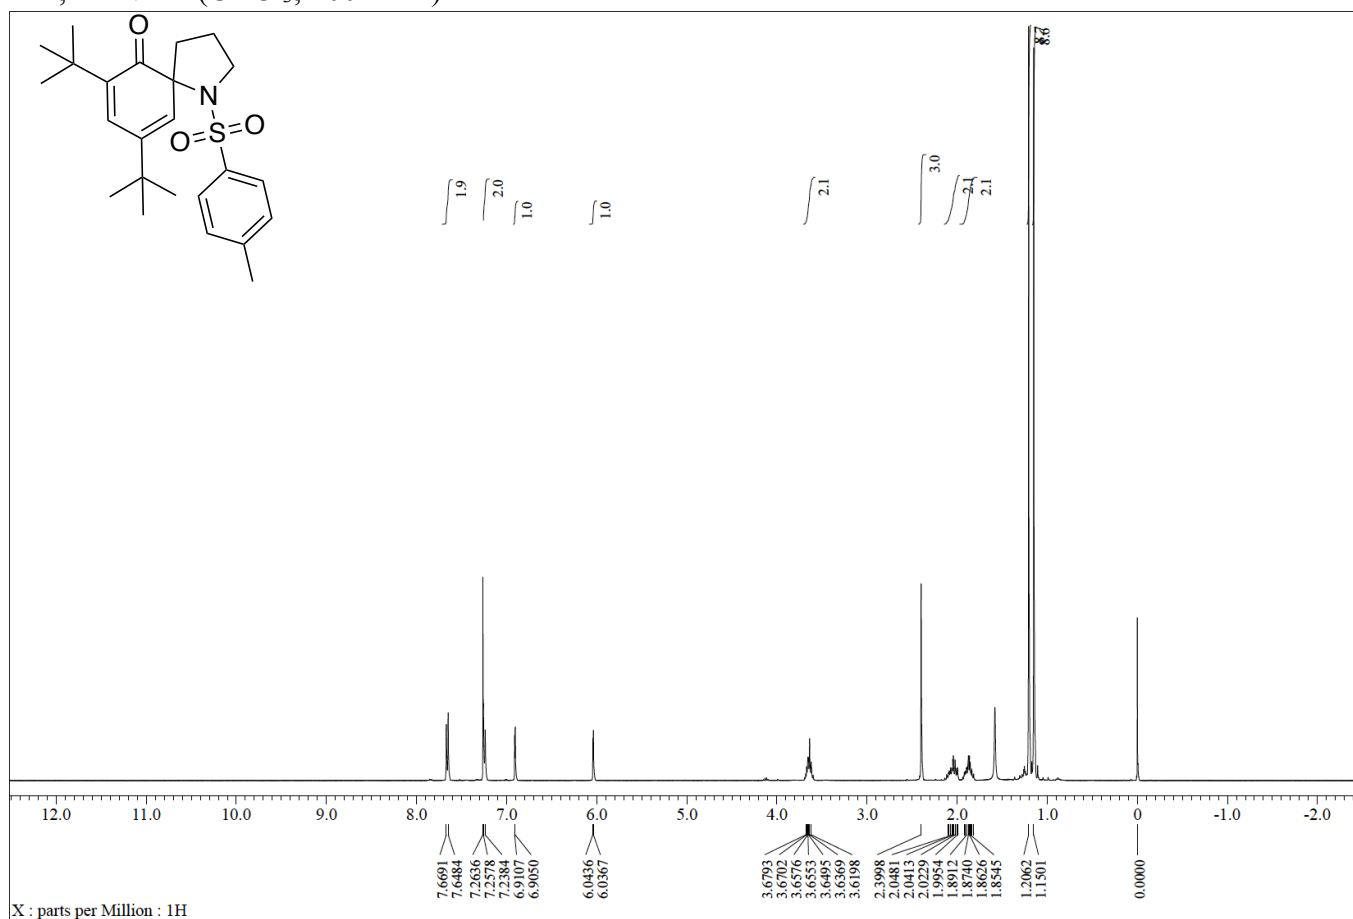

**4i**,  $^{13}\text{C}$  NMR ( $\text{CD}_2\text{Cl}_2$ , 100 MHz)

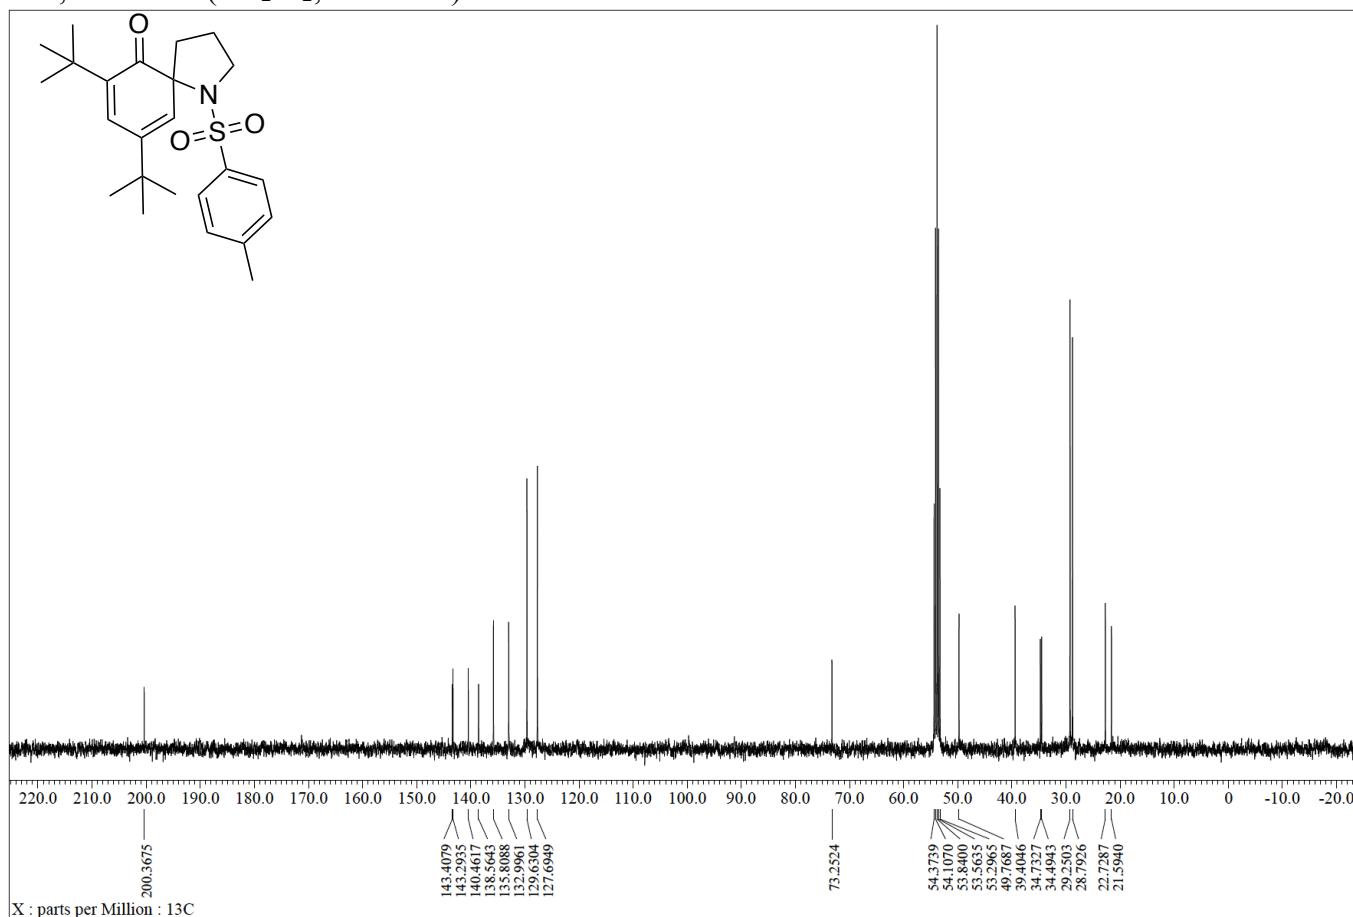

**4j**,  $^1\text{H}$  NMR ( $\text{CDCl}_3$ , 400 MHz)

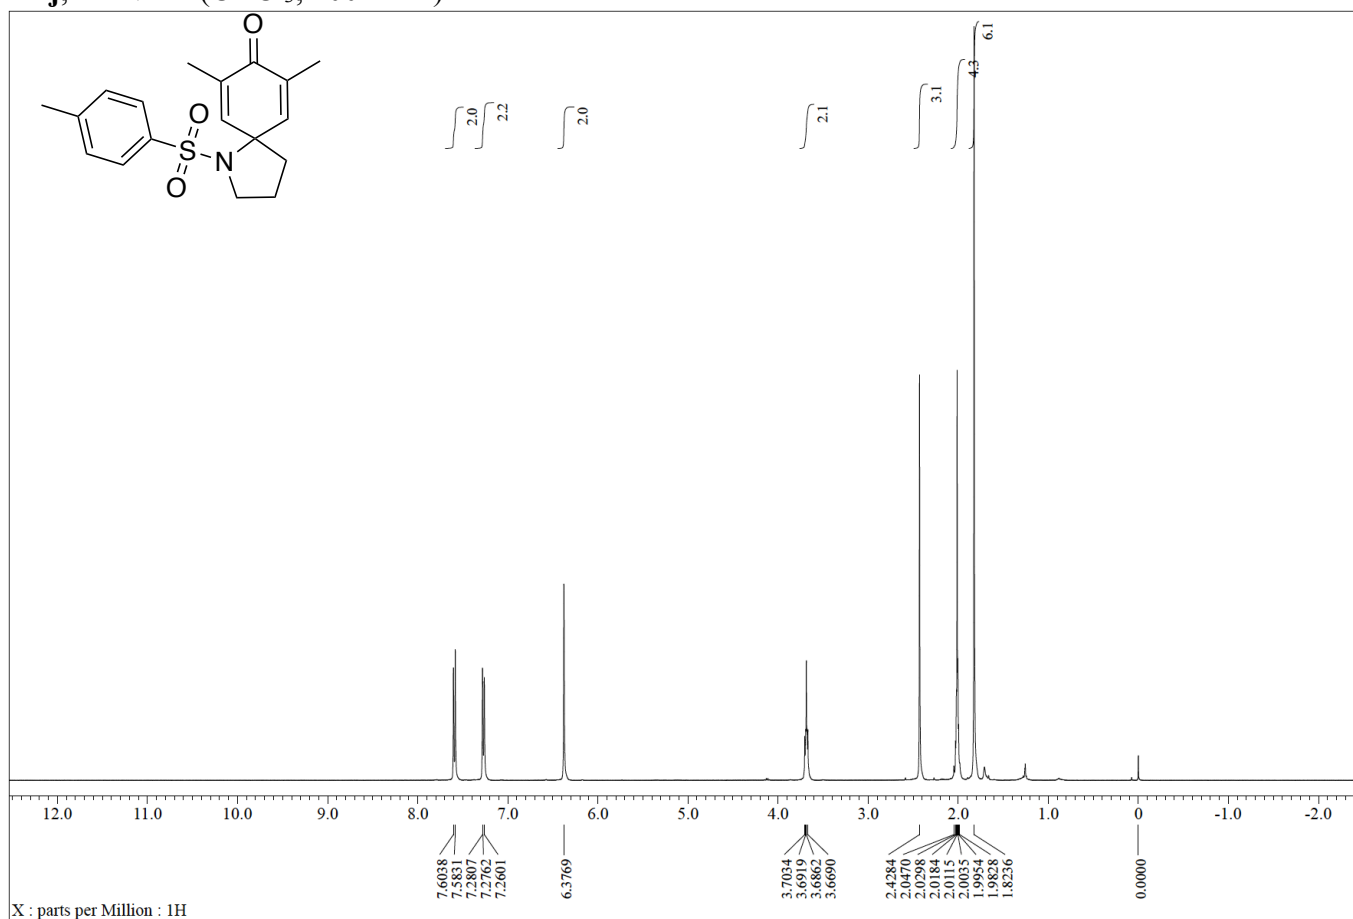

**4j**,  $^{13}\text{C}$  NMR ( $\text{CDCl}_3$ , 100 MHz)

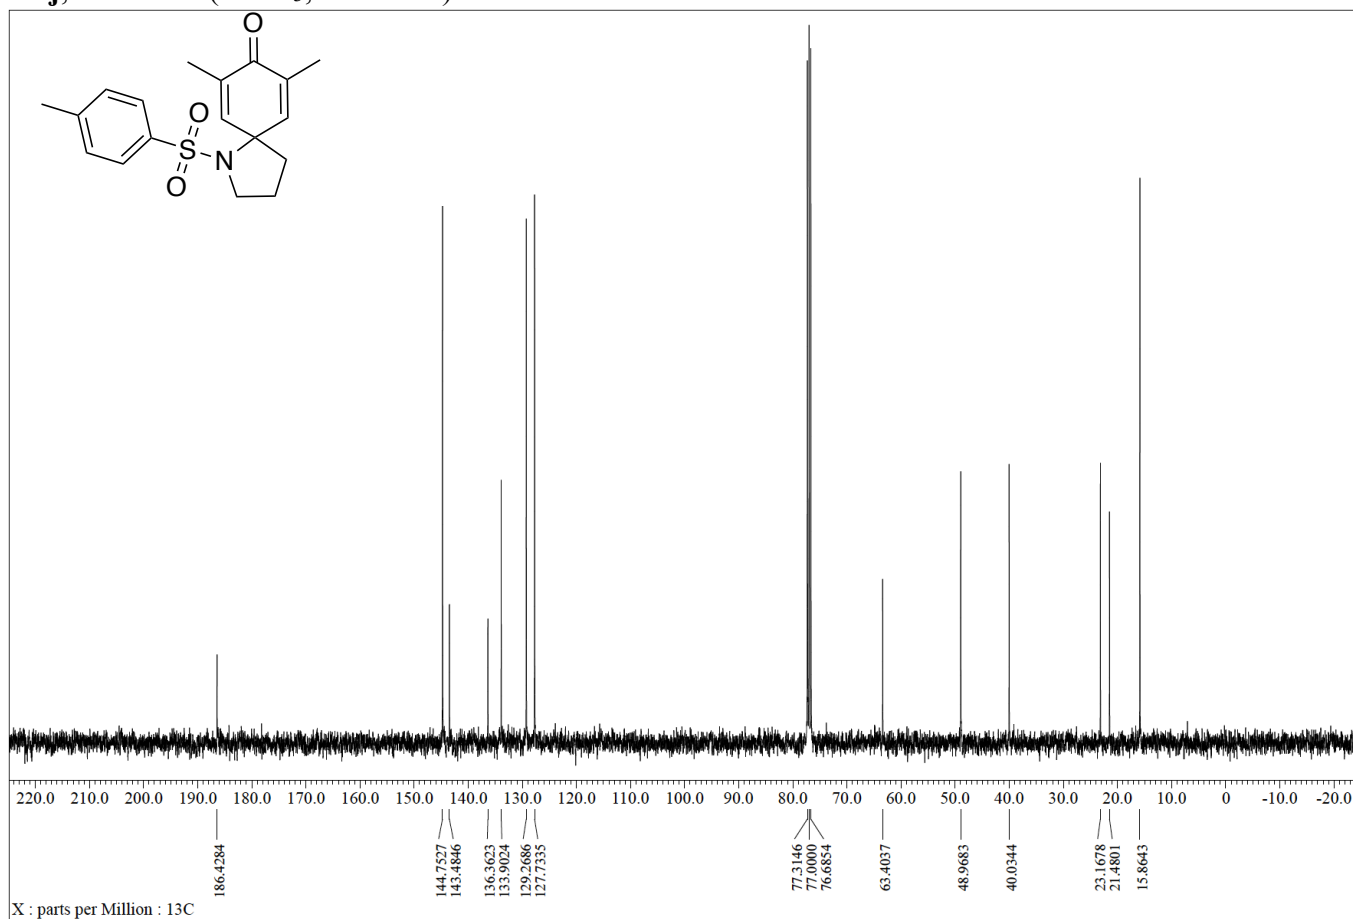

Supplement: Supplementary file 1 [file 20422662]
